# Supplementary material for: Albumin-to-Globulin ratio as an independent risk factor for predicting prognostic risk in patients with acute coronary syndrome undergoing percutaneous coronary intervention
Source: Research Square preprint supplement (doi:10.21203/rs.3.rs-6715881/v1), 2025-06-02
Supplement: Supplementary file 1 [file 1fa3671e6037b1d5ffa57483.xlsx]

## Sheet: AGR
No	姓名	年份	入院日	住院号	总蛋白	白蛋白	球蛋白	白球比值	再入院日期	再入院诊断	再入院支架	ACS分型诊断	随访日	罪犯血管	一支血管病变	两支病变血管	三支血管病变	UA	STEMI	NSTEMI	性别（男1，女0）	年龄	年龄gt651	射血分数EF％	EFlt40	WBC#10（3.59.5x109）	WBC↑	HGB	男性低于120女性110	HGB130	PLT#10血小板125350x109	PLT↑（gt35010）	HDL（0.821.96）	TCH（总胆固醇）（25.2）	TC≥5.21，lt5.20	TGm（甘油三酯）（0.51.7）	TG≥1.71，lt1.70	HDL（0.821.96）_A	HDL＜1.01，≥1.00	LDLmax（1.823.38）	LDL≥3.41，lt3.40	肌酸激酶同工酶CKMB峰值（016UL）	CKMB↑（gt16UL）	Cr	术前Cr110	术前尿酸最高值（100510umolL）	术前尿酸↑（gt500umolL）	血脂异常	高血压
12	王利泉	2016	2016-01-12	88045	72.5	44.8	27.7	1.61733	#NULL!		#NULL!	NSTEMI	2020-10-09	左回旋支、右冠状动脉	0	1	0	0	0	1	1	59	0	61	0	6.5	0	151	0	0	242	0	0.88	4.1	0	1.25	0	0.88	1	2.65	0	16	0	78.8	0	328	0	0	1
15	金明	2016	2015-12-25	86279	62.7	34.3	28.4	1.20775	#NULL!		#NULL!	NSTEMI	2020-10-09	左回旋支、右冠状动脉	0	1	0	0	0	1	1	76	1	61	0	6.2	0	152	0	0	166	0	0.97	2.66	0	0.97	0	0.97	1	1.25	0	16	0	78.9	0	367.9	0	0	1
24	李正臣	2016	2016-01-20	88946	57.6	34.1	23.5	1.45106	2019-02-18	UA	1	NSTEMI	#NULL!	右冠左室后支	1	0	0	0	0	1	1	64	0	63	0	7.77	0	134	0	0	218	0	1.27	2.74	0	0.91	0	1.27	0	1.06	0	21	1	54.4	0	173.4	0	0	1
67	王克军	2016	2016-03-07	93715	68.1	38.6	29.5	1.30847	2017-12-11	UA	#NULL!	NSTEMI	#NULL!	三支，左前降、左回旋、右冠	0	0	1	0	0	1	1	43	0	59	0	8.3	0	154	0	0	232	0	0.8	3.24	0	0.97	0	0.8	1	2	0	#NULL!	#NULL!	86.8	0	532.2	1	1	0
78	李宝坤	2016	2016-03-09	94044	72.3	38.2	34.1	1.12023	#NULL!		#NULL!	NSTEMI	2020-10-09	双支，左前降、左回旋	0	1	0	0	0	1	1	75	1	64	0	4.46	0	117	1	1	298	0	1.08	3.85	0	0.62	0	1.08	0	2.49	0	9	0	74.4	0	378.3	0	0	1
83	魏月峰	2016	2016-03-05	93562	72	37.8	34.2	1.10526	2017-11-14	高血压病3级 很高危	#NULL!	NSTEMI	2020-10-09	双支，左前降、右冠	0	1	0	0	0	1	1	60	0	58	0	8.1	0	160	0	0	211	0	0.88	3.28	0	1.36	0	0.88	1	1.78	0	13	0	121.1	1	393.1	0	0	1
87	邸建民	2016	2015-10-08	78425	73	40.6	32.4	1.25309	2016-03-17	陈旧性心梗	#NULL!	NSTEMI	#NULL!	三支	0	0	1	0	0	1	1	67	1	54	0	8.6	0	143	0	0	213	0	0.83	4.07	0	1.96	1	0.83	1	2.35	0	12	0	75	0	247.5	0	1	1
98	姚世棉	2016	2016-03-16	94900	67.5	37.2	30.3	1.22772	#NULL!		#NULL!	NSTEMI	2020-10-09	三支	0	0	1	0	0	1	1	62	0	48	0	8.29	0	150	0	0	217	0	0.78	3.6	0	1	0	0.78	1	2.37	0	12	0	86.6	0	293.4	0	1	1
104	乔俊朋	2016	2016-04-02	96969	75.6	39.2	36.4	1.07692	#NULL!		#NULL!	NSTEMI	2020-10-09	双支，左前降、左回旋	0	1	0	0	0	1	1	61	0	62	0	10.2	1	147	0	0	278	0	1.1	5.62	1	2.69	1	1.1	0	3.3	0	7	0	71.6	0	411.8	0	1	1
109	刘桂芬	2016	2016-04-13	98351	77.2	40.5	36.7	1.10354	#NULL!		#NULL!	NSTEMI	2020-10-09	三支	0	0	1	0	0	1	0	73	1	64	0	8.61	0	129	0	1	175	0	1.48	6.08	1	1.43	0	1.48	0	3.95	1	10	0	54.5	0	203.7	0	1	1
132	王录	2016	2016-04-11	98083	63.6	37.6	26	1.44615	#NULL!		#NULL!	NSTEMI	2020-10-09	三支	0	0	1	0	0	1	1	66	1	55	0	10.52	1	134	0	0	207	0	0.86	2.82	0	1.92	1	0.86	1	1.09	0	58	1	53.78	0	391.5	0	1	0
134	赵金瑞	2016	2016-04-11	98059	74.6	43.9	30.7	1.42997	#NULL!		#NULL!	NSTEMI	2020-10-09	三支	0	0	1	0	0	1	1	62	0	66	0	6.81	0	157	0	0	281	0	1.38	5.85	1	1.94	1	1.38	0	3.59	1	10	0	90.63	0	382.3	0	1	0
135	孟庆义	2016	2016-04-30	100264	72.5	40.4	32.1	1.25857	#NULL!		#NULL!	NSTEMI	2020-10-09	双支，左前降、左回旋	0	1	0	0	0	1	1	49	0	#NULL!	#NULL!	12.19	1	170	0	0	286	0	1.2	5.36	1	1.28	0	1.2	0	3.58	1	18	1	47.9	0	261.3	0	1	0
153	王瑞茹	2016	2016-05-05	100881	76.8	40.1	36.7	1.09264	2018-12-03	UA	1	NSTEMI	#NULL!	双支，左前降、左回旋	0	1	0	0	0	1	0	63	0	47	0	8	0	122	0	1	355	1	1.03	4.18	0	4.5	1	1.03	0	2.07	0	13.62	0	74.33	0	284.3	0	1	1
157	李广军	2016	2016-05-22	102889	67.1	38.7	28.4	1.36268	#NULL!		#NULL!	NSTEMI	2020-10-09	三支	0	0	1	0	0	1	1	60	0	61	0	8.88	0	155	0	0	255	0	1.29	4.43	0	2.65	1	1.29	0	1.94	0	15	0	63.1	0	245.7	0	1	1
160	李新田	2016	2016-04-29	100205	64.6	42.5	22.1	1.92308	2018-03-23	UA、陈旧心梗	#NULL!	NSTEMI	#NULL!	单支，右冠	1	0	0	0	0	1	1	63	0	54	0	8.55	0	150	0	0	187	0	0.92	3.96	0	1.2	0	0.92	1	2.13	0	#NULL!	#NULL!	96.2	0	266	0	0	0
168	李建春	2016	2016-05-24	103143	70.2	38	32.2	1.18012	2019-01-14	UA	#NULL!	NSTEMI	#NULL!	双支，左前降、左回旋	0	1	0	0	0	1	0	60	0	63	0	7.14	0	137	0	0	214	0	1.32	5.42	1	3.32	1	1.32	0	2.59	0	11	0	52.3	0	347.3	0	1	1
174	王秀英	2016	2016-05-30	103877	74.2	42.1	32.1	1.31153	2016-08-31	UA	#NULL!	NSTEMI	#NULL!	双支，左前降、右冠	0	1	0	0	0	1	0	83	1	60	0	4.45	0	110	0	1	231	0	0.95	4.15	0	2.33	1	0.95	1	2.14	0	30	1	39.2	0	251.7	0	0	1
182	徐小伶	2016	2016-05-25	103374	65.6	34.3	31.3	1.09585	#NULL!		#NULL!	NSTEMI	2020-10-09	三支	0	0	1	0	0	1	0	53	0	64	0	11.57	1	132	0	0	242	0	1.09	4.2	0	1.91	1	1.09	0	2.24	0	12	0	91.1	0	346.8	0	1	1
187	周桂苹	2016	2016-06-22	106534	73.4	40.6	32.8	1.2378	#NULL!		#NULL!	NSTEMI	2020-10-09	三支	0	0	1	0	0	1	0	46	0	66	0	6.54	0	117	0	1	225	0	5.42	7.26	1	1.25	0	5.42	0	5.41	1	42	1	33	0	330.6	0	0	1
189	张国林	2016	2016-06-13	105355	71.9	42.8	29.1	1.47079	2017-05-22	UA	1	NSTEMI	#NULL!	双支，左前降、左回旋	0	1	0	0	0	1	1	54	0	43	0	11.31	1	145	0	0	193	0	1.02	3.46	0	1.5	0	1.02	0	1.76	0	77	1	62.3	0	404.4	0	0	1
191	孟繁邹	2016	2016-06-21	106435	83.4	47.7	35.7	1.33613	#NULL!		#NULL!	NSTEMI	2020-10-10	单支，左回旋	1	0	0	0	0	1	1	76	1	60	0	9.9	1	151	0	0	160	0	1.11	4.39	0	3.21	1	1.11	0	1.82	0	22	1	83	0	286.8	0	1	1
195	钱进	2016	2016-06-18	105984	69.2	40	29.2	1.36986	#NULL!		#NULL!	NSTEMI	2020-10-10	双支，左回旋、左前降	0	1	0	0	0	1	1	47	0	55	0	11.41	1	165	0	0	257	0	1.31	4.69	0	2.39	1	1.31	0	2.29	0	178	1	63.9	0	285.9	0	1	0
197	刘奎	2016	2016-07-02	107682	77.2	44.6	32.6	1.3681	#NULL!		#NULL!	NSTEMI	2020-10-10	单支，左前降	1	0	0	0	0	1	1	58	0	64	0	7.55	0	142	0	0	169	0	1.05	5.31	1	2.85	1	1.05	0	2.96	0	7	0	83.3	0	433.5	0	1	0
204	陈怀仁	2016	2016-06-30	66017	63.3	35.4	27.9	1.26882	#NULL!		#NULL!	NSTEMI	2020-10-10	双支，左前降支、右冠状动脉	0	1	0	0	0	1	1	77	1	56	0	7.35	1	153	0	0	184	0	0.84	3.82	0	1.31	0	0.84	1	2.38	0	25	1	88.9	0	324.3	0	0	1
213	张大华	2016	2016-07-09	108462	62.2	35.3	26.9	1.31227	2018-05-25	UA	#NULL!	NSTEMI	#NULL!	双支，左前降支、右冠状动脉	0	1	0	0	0	1	1	60	0	49	0	6.84	0	135	0	0	198	0	1.16	3.45	0	1.24	0	1.16	0	1.73	0	70	1	53.26	0	354.9	0	0	1
223	马文英	2016	2016-08-03	46100	80.9	43.6	37.3	1.1689	2016-07-13	UA	#NULL!	NSTEMI	#NULL!	三支	0	0	1	0	0	1	0	49	0	56	0	7.03	0	145	0	0	207	0	1	5.29	1	3.32	1	1	0	2.78	0	11	0	61.9	0	327.9	0	1	1
225	郭佳	2016	2016-07-26	110633	76.1	41.5	34.6	1.19942	#NULL!		#NULL!	NSTEMI	2020-10-10	三支	0	0	1	0	0	1	1	38	0	42	0	14.67	1	158	0	0	232	0	0.99	5.52	1	2.58	1	0.99	1	3.36	0	138	1	61.2	0	437.3	0	1	1
237	刘玉田	2016	2016-08-06	111957	75.6	44.9	30.7	1.46254	#NULL!		#NULL!	NSTEMI	2020-10-10	双支，左前降、左回旋	0	1	0	0	0	1	1	61	0	62	0	10.63	1	155	0	0	223	0	1.38	5.65	1	3.28	1	1.38	0	2.78	0	14	0	96.7	0	455.8	0	1	1
239	刘子清	2016	2016-08-15	112935	59.9	35.9	24	1.49583	#NULL!		#NULL!	NSTEMI	2020-10-10	单支，左前降支	1	0	0	0	0	1	1	59	0	59	0	9.35	0	161	0	0	225	0	1.33	4.34	0	1.06	0	1.33	0	2.75	0	#NULL!	#NULL!	74.7	0	347.8	0	0	0
240	赵俊宝	2016	2016-08-05	111808	69.1	39	30.1	1.29568	#NULL!		#NULL!	NSTEMI	2020-10-10	单支，左前降支	1	0	0	0	0	1	1	71	1	52	0	7.38	0	147	0	0	229	0	1.14	4.01	0	1.54	0	1.14	0	2.17	0	41	1	77.4	0	342.8	0	0	1
241	严惠洲	2016	2016-08-04	111768	75.9	41.4	34.5	1.2	#NULL!		#NULL!	NSTEMI	2020-10-10	三支	0	0	1	0	0	1	1	63	0	63	0	7.29	0	146	0	0	182	0	0.96	4.47	0	1.43	0	0.96	1	2.86	0	26	1	71	0	427.6	0	0	1
243	周桂苹	2016	2016-06-22	106534	73.4	40.6	32.8	1.2378	#NULL!		#NULL!	NSTEMI	2020-10-09	单支，右冠	1	0	0	0	0	1	0	46	0	66	0	6.54	1	117	0	0	225	0	1.6	3.36	0	0.89	0	1.6	0	1.36	0	23	1	60.5	0	274.8	0	0	1
247	马忠良	2016	2016-08-12	112640	69.2	41.5	27.7	1.49819	#NULL!		#NULL!	NSTEMI	2020-10-10	三支	0	0	1	0	0	1	1	47	0	63	0	7.14	0	155	0	0	219	0	0.91	5.28	1	2.42	1	0.91	1	3.27	0	18	1	62.1	0	226	0	1	1
275	高义顺	2016	2016-09-18	116559	66.1	37.7	28.4	1.32746	#NULL!		#NULL!	NSTEMI	2020-10-10	单支，左回旋	1	0	0	0	0	1	1	51	0	68	0	6.96	0	143	0	0	206	0	0.69	4.44	0	2.74	1	0.69	1	2.5	0	16	0	62.7	0	672.3	1	1	1
276	王玉荣	2016	2016-09-21	117147	72.9	40.3	32.6	1.2362	#NULL!		#NULL!	NSTEMI	2020-10-14	三支	0	0	1	0	0	1	0	64	0	42	0	6.51	0	136	0	0	200	0	1.48	3.3	0	0.94	0	1.48	0	1.36	0	4.3	0	59.88	0	270.5	0	1	1
278	高淑芬	2016	2016-09-19	15639	75.8	44.6	31.2	1.42949	2019-03-11	UA	#NULL!	NSTEMI	#NULL!	单支，左前降支	1	0	0	0	0	1	0	78	1	53	0	5.83	0	149	0	0	158	0	1.15	4.13	0	1.26	0	1.15	0	2.26	0	8.7	0	55.07	0	201.5	0	1	1
279	范成山	2016	2016-09-13	116198	68.5	39.3	29.2	1.34589	#NULL!		#NULL!	NSTEMI	2020-10-10	三支	0	0	1	0	0	1	1	65	0	43	0	11.53	1	160	0	0	169	0	1.35	5.32	1	1.35	0	1.35	0	3.36	0	15	0	60.4	0	406.2	0	0	0
288	韩天侠	2016	2015-10-19	79575	69.5	36.5	33	1.10606	2018-06-11	陈旧性下壁心梗	1	NSTEMI	#NULL!	三支	0	0	1	0	0	1	0	68	1	46	0	8.63	0	133	0	0	169	0	1.46	5.16	0	2.32	1	1.46	0	2.73	0	237.75	1	48.32	0	245.9	0	1	1
292	张建华	2016	2016-10-12	119277	72.1	42.8	29.3	1.46075	2019-03-18	UA	1	NSTEMI	#NULL!	双支，左前降、左回旋	0	1	0	0	0	1	1	60	0	66	0	7.43	0	162	0	0	277	0	1.22	3.89	0	1.31	0	1.22	0	2.07	0	9	0	63.7	0	274.9	0	0	1
293	张玉仁	2016	2016-10-08	118598	73.8	42.8	31	1.38065	#NULL!		#NULL!	NSTEMI	2020-10-10	三支	0	0	1	0	0	1	1	58	0	67	0	7.6	1	152	0	0	164	0	0.96	4.14	0	4.02	1	0.96	1	1.35	0	15	0	67.3	0	414.3	0	1	1
297	冯树清	2016	2016-10-16	45986	83.3	48.4	34.9	1.38682	#NULL!		#NULL!	NSTEMI	2020-10-10	双支，左回旋、右冠	0	1	0	0	0	1	1	53	0	55	0	12.97	1	195	0	0	192	0	1.46	6.79	1	2.28	1	1.46	0	4.29	1	35	1	67.8	0	302.4	0	1	0
302	孙桂芝	2016	2016-10-08	118629	75.1	43.3	31.8	1.36164	#NULL!		#NULL!	NSTEMI	2020-10-10	单支，左前降支	1	0	0	0	0	1	0	72	1	58	0	9.8	1	154	0	0	207	0	1.12	6.01	1	4.9	1	1.12	0	2.66	0	11	0	68.9	0	392.2	0	0	1
305	贾荣杰	2016	2016-10-24	120753	70.8	39	31.8	1.22642	#NULL!		#NULL!	NSTEMI	2020-10-10	单支，左前降支	1	0	0	0	0	1	1	60	0	61	0	9.31	0	151	0	0	207	0	1.07	4.54	0	2.04	1	1.07	0	2.54	0	3	0	72.2	0	283.3	0	1	1
324	姜春海	2016	2016-11-07	122470	66.9	37.6	29.3	1.28328	#NULL!		#NULL!	NSTEMI	2020-10-10	三支	0	0	1	0	0	1	1	60	0	56	0	6.4	0	135	0	0	249	0	1.31	3.91	0	0.89	0	1.31	0	2.2	0	29	1	73	0	349.4	0	0	1
337	丁克山	2016	2016-11-15	123509	67.3	41	26.3	1.55894	#NULL!		#NULL!	NSTEMI	2020-10-11	双支，左前降、左回旋	0	1	0	0	0	1	1	66	1	61	0	6.78	0	143	0	0	164	0	1	3.65	0	1.22	0	1	0	2.18	0	31	1	68	0	302	0	0	1
348	程玉珍	2016	2016-12-07	126250	62.4	38.1	24.3	1.5679	2016-08-23	陈旧性下壁心梗	1	NSTEMI	#NULL!	单支，右冠	1	0	0	0	0	1	0	56	0	59	0	4.27	0	144	0	0	310	0	0.87	3.49	0	1.64	0	0.87	1	1.87	0	20	1	50.9	0	236.2	0	0	0
354	王春雨	2016	2016-12-05	125992	68.1	36.9	31.2	1.18269	2016-12-26	NSTEMI亚急性期	1	NSTEMI	#NULL!	三支	0	0	1	0	0	1	1	45	0	59	0	9.45	0	163	0	0	211	0	1.05	3.88	0	1.94	1	1.05	0	1.95	0	19	1	86.9	0	335.5	0	1	1
355	赵有武	2016	2016-12-12	126864	55.7	31.2	24.5	1.27347	#NULL!		#NULL!	NSTEMI	2020-10-11	单支，左回旋	1	0	0	0	0	1	1	60	0	45	0	9.32	0	119	1	1	174	0	1.87	4.05	0	0.67	0	1.87	0	1.88	0	75	1	51.9	0	297.7	0	0	0
357	成新利	2016	2016-12-12	126107	62.9	40.2	22.7	1.77093	#NULL!		#NULL!	NSTEMI	2020-10-11	双支，左回旋、右冠	0	1	0	0	0	1	1	47	0	65	0	10.12	1	147	0	0	298	0	0.73	2.83	0	0.93	0	0.73	1	1.68	0	#NULL!	#NULL!	70.1	0	352.5	0	1	0
361	李志勇	2016	2016-12-16	11511	67.4	37.6	29.8	1.26174	#NULL!		#NULL!	NSTEMI	2020-10-11	双支，左前降、左回旋	0	1	0	0	0	1	1	65	0	61	0	5.85	0	159	0	0	159	0	#NULL!	#NULL!	0	#NULL!	0	#NULL!	1	#NULL!	0	#NULL!	#NULL!	63.4	0	302.8	0	0	0
379	王春雨	2016	2016-12-05	125992	68.1	36.9	31.2	1.18269	2016-12-26	NSTEMI亚急性期	1	NSTEMI	#NULL!	三支	0	0	1	0	0	1	1	45	0	59	0	9.45	0	163	0	0	211	0	1.05	3.88	0	1.94	1	1.05	0	1.95	0	19	1	86.9	0	335.5	0	1	1
381	白淑芹	2017	2017-09-18	163428	70.2	37.9	32.3	1.17337	2019-09-11	UA	#NULL!	NSTEMI	#NULL!	三支	0	0	1	0	0	1	0	65	0	34	1	7.97	0	128	0	1	27	0	1.5	4.69	0	2.98	1	1.5	0	2.25	0	2.7	0	59.74	0	239.3	0	0	1
383	黄秀琴	2017	2016-09-11	169601	67	35.2	31.8	1.10692	#NULL!		#NULL!	NSTEMI	2020-10-10	三支	0	0	1	0	0	1	0	65	0	55	0	6.92	0	140	0	0	231	0	1.35	4.91	0	1.64	0	1.35	0	2.81	0	17	1	54.4	0	336.5	0	0	1
385	李翠华	2017	2017-11-22	171545	75.3	43.3	32	1.35312	#NULL!		#NULL!	NSTEMI	2020-10-10	三支	0	0	1	0	0	1	0	77	1	57	0	6.23	0	148	0	0	216	0	1	3.91	0	1.51	0	1	0	2.22	0	12	0	68.8	0	303.5	0	1	1
386	陈忠福	2017	2017-12-22	175609	75.5	45.9	29.6	1.55068	#NULL!		#NULL!	NSTEMI	2020-10-10	三支	0	0	1	0	0	1	0	51	0	68	0	10.51	1	141	0	0	237	0	0.84	4.41	0	5.12	1	0.84	1	1.24	0	14	0	75.4	0	305.4	0	1	1
391	张志彬	2017	2016-12-23	128228	66.3	38.2	28.1	1.35943	#NULL!		#NULL!	NSTEMI	2020-10-11	三支	0	0	1	0	0	1	1	58	0	45	0	11.5	1	157	0	0	231	0	#NULL!	#NULL!	0	#NULL!	0	#NULL!	1	#NULL!	0	183	1	49.9	0	267.7	0	0	1
407	刘桂芬	2017	2017-01-06	98351	78.2	44.3	33.9	1.30678	#NULL!		#NULL!	NSTEMI	2020-10-10	多支，左主干、左前降、左回旋、右冠	0	0	1	0	0	1	0	74	1	63	0	8.61	0	129	0	1	175	0	1.25	5.43	1	1.8	1	1.25	0	3.36	0	14	0	76	0	260.7	0	1	1
428	王淑贤	2017	2017-02-01	858	77.4	43.3	34.1	1.26979	#NULL!		#NULL!	NSTEMI	2020-10-14	单支，左回旋	1	0	0	0	0	1	0	63	0	31	1	6.1	0	138	0	0	274	0	1.24	4.27	0	2.98	1	1.24	0	2.13	0	13.04	0	60	0	476	0	0	0
436	韩九恩	2017	2017-01-31	108950	70.6	39.9	30.7	1.29967	#NULL!		#NULL!	NSTEMI	2020-10-11	双支，左回旋、右冠	0	1	0	0	0	1	1	58	0	56	0	9.23	0	145	0	0	190	0	0.79	4.74	0	2.69	1	0.79	1	2.73	0	23	1	80.1	0	315.4	0	1	1
439	郑玉怀	2017	2017-02-06	132885	65.5	42.4	23.1	1.8355	2017-07-06	UA	#NULL!	NSTEMI	#NULL!	单支，左回旋	1	0	0	0	0	1	1	58	0	68	0	5.16	0	167	0	0	184	0	1.15	4.94	0	1.41	0	1.15	0	2.59	0	25	1	75.5	0	343	0	0	0
443	姚学华	2017	2017-01-21	131526	72.2	42.5	29.7	1.43098	#NULL!		#NULL!	NSTEMI	2020-10-11	单支，左前降	1	0	0	0	0	1	1	31	0	59	0	9.11	0	162	0	0	196	0	1.31	4.45	0	0.98	0	1.31	0	2.69	0	82	1	65.1	0	303.7	0	0	0
454	苏海军	2017	2017-02-18	134787	70.3	40.4	29.9	1.35117	#NULL!		#NULL!	NSTEMI	2020-10-11	双支，左前降、右冠	0	1	0	0	0	1	1	52	0	57	0	6.8	0	130	0	0	187	0	1.38	5.63	1	1.34	0	1.38	0	2.97	0	9	0	66.3	0	212.6	0	1	0
459	万和	2017	2017-02-20	134894	70.7	43.4	27.3	1.58974	#NULL!		#NULL!	NSTEMI	2020-10-11	单支，右冠	1	0	0	0	0	1	1	78	1	60	0	4.14	0	131	0	0	149	0	1.22	2.96	0	0.51	0	1.22	0	1.51	0	10	0	67.3	0	368.6	0	0	0
465	许淑荣	2017	2017-02-25	135708	68.4	35.5	32.9	1.07903	#NULL!		#NULL!	NSTEMI	2020-10-14	三支	0	0	1	0	0	1	0	65	0	44	0	6.65	0	191	0	0	248	0	0.78	4.57	0	4.47	1	0.78	1	2.59	0	36.19	1	64.6	0	336.4	0	0	1
467	邓贺海	2017	2017-03-01	136281	76.4	43.1	33.3	1.29429	#NULL!		#NULL!	NSTEMI	2020-10-11	三支	0	0	1	0	0	1	1	46	0	#NULL!	#NULL!	8.54	0	148	0	0	182	0	0.88	4.8	0	3.66	1	0.88	1	2.26	0	36	1	52.8	0	305.7	0	1	0
468	周彦斌	2017	2017-03-01	136289	68.4	40	28.4	1.40845	#NULL!		#NULL!	NSTEMI	2020-10-11	双支，左回旋、右冠	0	1	0	0	0	1	1	49	0	65	0	7.17	0	153	0	0	184	0	1.09	3.22	0	2.37	1	1.09	0	1.05	0	42	1	65.4	0	204.4	0	1	0
491	张克义	2017	2017-03-08	137284	68.2	38	30.2	1.25828	#NULL!		#NULL!	NSTEMI	2020-10-11	三支	0	0	1	0	0	1	1	56	0	66	0	7.6	0	144	0	0	185	0	1.05	3.17	0	2.96	1	1.05	0	0.77	0	25	1	155.4	1	361	0	1	1
496	王子玉	2017	2017-03-15	138207	70.4	38.7	31.7	1.22082	#NULL!		#NULL!	NSTEMI	2020-10-11	双支，左回旋、右冠	0	1	0	0	0	1	1	63	0	59	0	6.75	0	135	0	0	172	0	1.58	3.98	0	0.73	0	1.58	0	2.07	0	25	1	73.2	0	410	0	0	1
500	孟庆成	2017	2017-03-19	123289	61.7	41.9	19.8	2.11616	#NULL!		#NULL!	NSTEMI	2020-10-11	单支，右冠	1	0	0	0	0	1	1	45	0	55	0	8.27	0	151	0	0	198	0	0.78	3.09	0	4.03	1	0.78	1	0.9	0	24	1	54.1	0	491.2	0	1	1
503	谢万利	2017	2017-03-17	138518	67.5	43.6	23.9	1.82427	#NULL!		#NULL!	NSTEMI	2020-10-11	双支，左回旋、右冠	0	1	0	0	0	1	1	50	0	59	0	8.2	0	152	0	0	225	0	0.7	3.82	0	6.05	1	0.7	1	0.86	0	84	1	59.2	0	307.1	0	1	1
514	潘淑贤	2017	2017-04-05	140774	64.8	40.2	24.6	1.63415	#NULL!		#NULL!	NSTEMI	2020-10-14	双支，左前降、右冠	0	1	0	0	0	1	0	72	1	50	0	6.75	0	135	0	0	244	0	1.39	3.86	0	0.95	0	1.39	0	1.88	0	177.77	1	51.6	0	370.4	0	1	1
516	邓贺安	2017	2017-03-27	139843	73.1	39.9	33.2	1.20181	#NULL!		#NULL!	NSTEMI	2020-10-12	三支	0	0	1	0	0	1	1	52	0	56	0	15.5	1	140	0	0	238	0	#NULL!	#NULL!	0	#NULL!	0	#NULL!	1	#NULL!	0	148	1	83.9	0	354.9	0	0	0
527	叶凤山	2017	2017-04-05	140883	74	40.4	33.6	1.20238	2018-05-15	HBP	#NULL!	NSTEMI	2020-10-12	双支，中间支、右冠	0	1	0	0	0	1	1	61	0	66	0	5.1	0	175	0	0	169	0	0.94	5.89	1	2.13	1	0.94	1	3.98	1	15	0	73.3	0	216.4	0	1	1
531	邵清友	2017	2017-04-16	142317	68.5	38.9	29.6	1.31419	#NULL!		#NULL!	NSTEMI	2020-10-12	单支，右冠	1	0	0	0	0	1	1	60	0	58	0	8.71	0	159	0	0	167	0	0.58	3.39	0	1.33	0	0.58	1	1.59	0	106	1	53.3	0	216.9	0	1	1
538	樊文元	2017	2017-04-17	142401	70	41	29	1.41379	#NULL!		#NULL!	NSTEMI	2020-10-12	双支，左前降、左回旋	0	1	0	0	0	1	1	51	0	66	0	11.96	1	172	0	0	214	0	0.86	3.69	0	2.06	1	0.86	1	1.89	0	69	1	60.9	0	363.6	0	1	1
561	王秀英	2017	2017-05-12	145936	73.5	43	30.5	1.40984	2017-10-18	UA	#NULL!	NSTEMI	#NULL!	双支，左回旋、左前降	0	1	0	0	0	1	0	66	1	67	0	5.2	0	143	0	0	214	0	1.11	4.55	0	3.18	1	1.11	0	1.99	0	7	0	69.1	0	295.3	0	0	0
567	董文珍	2017	2017-05-08	107539	86.5	44.5	42	1.05952	2017-12-25	UA	#NULL!	NSTEMI	2020-10-11	三支	0	0	1	0	0	1	0	73	1	63	0	8.29	0	135	0	0	297	0	1.09	7.02	1	5.16	1	1.09	0	4.23	1	19	1	90.57	0	380.9	0	1	1
568	王桂清	2017	2017-05-18	146864	73.6	38.1	35.5	1.07324	2018-09-26	UA	#NULL!	NSTEMI	#NULL!	三支	0	0	1	0	0	1	0	76	1	52	0	8.66	0	157	0	0	220	0	1.36	6.48	1	2.28	1	1.36	0	3.87	1	14.81	0	68.9	0	266.7	0	0	0
576	成林权	2017	2017-05-26	147858	67	40.3	26.7	1.50936	#NULL!		#NULL!	NSTEMI	2020-10-12	双支，左前降、右冠	0	1	0	0	0	1	1	54	0	61	0	8.71	0	149	0	0	244	0	1.72	4.42	0	0.33	0	1.72	0	2.55	0	159	1	57.7	0	340.6	0	0	0
590	张国林	2017	2016-06-13	105355	71.9	42.8	29.1	1.47079	2017-05-22	UA	1	NSTEMI	#NULL!	双支，左前降支、左回旋支	0	1	0	0	0	1	1	55	0	56	0	11.31	1	162	0	0	193	0	1.02	3.46	0	1.5	0	1.02	0	1.76	0	77	1	72.8	0	404.4	0	0	1
591	裴显林	2017	2017-05-27	3679	65.9	38.1	27.8	1.3705	#NULL!		#NULL!	NSTEMI	2020-10-12	三支	0	0	1	0	0	1	1	49	0	66	0	7.29	0	138	0	0	172	0	0.75	3.62	0	1.6	0	0.75	1	2.14	0	56	1	126.4	1	377.2	0	1	0
620	刘丽华	2017	2017-06-24	151573	69.7	38.3	31.4	1.21975	#NULL!		#NULL!	NSTEMI	2020-10-11	三支	0	0	1	0	0	1	0	60	0	57	0	9.3	0	147	0	0	317	0	1.22	2.47	0	0.76	0	1.22	0	0.9	0	8	0	78.3	0	226.8	0	1	0
631	王剑飞	2017	2017-06-26	151875	66.9	40.7	26.2	1.55344	#NULL!		#NULL!	NSTEMI	2020-10-12	双支，左回旋、右冠	0	1	0	0	0	1	1	46	0	68	0	11.15	1	162	0	0	170	0	0.92	3.34	0	2.13	1	0.92	1	1.45	0	12	0	63.1	0	228.1	0	1	1
649	项秀兰	2017	2017-07-14	45878	62.2	35.3	26.9	1.31227	#NULL!		#NULL!	NSTEMI	2020-10-11	三支	0	0	1	0	0	1	0	71	1	57	0	6.78	0	166	0	0	178	0	1	4.59	0	1.54	0	1	0	2.89	0	23	1	85.7	0	273.7	0	0	1
654	王文书	2017	2015-07-20	32624	76.8	41.7	35.1	1.18803	2017-07-21	UA	1	NSTEMI	#NULL!	三支	0	0	1	0	0	1	1	58	0	60	0	9.81	1	146	0	0	213	0	1.16	5.67	1	2.38	1	1.16	0	3.43	1	9	0	54.8	0	290.1	0	1	0
661	周会恩	2017	2017-07-27	156160	69.9	38.4	31.5	1.21905	#NULL!		#NULL!	NSTEMI	2020-10-12	三支	0	0	1	0	0	1	1	57	0	59	0	6.74	0	122	0	1	117	0	1.33	4.71	0	0.86	0	1.33	0	2.35	0	#NULL!	#NULL!	85	0	309.9	0	0	0
663	郭桂兰	2017	2017-02-27	156376	71.4	38.4	33	1.16364	#NULL!		#NULL!	NSTEMI	2020-10-11	单支，左回旋支	1	0	0	0	0	1	0	65	0	68	0	8.93	0	168	0	0	288	0	0.75	3.45	0	1.74	1	0.75	1	1.8	0	#NULL!	#NULL!	57.8	0	263.2	0	0	1
671	胡宗有	2017	2017-08-02	157154	73.2	39.7	33.5	1.18507	#NULL!		#NULL!	NSTEMI	2020-10-12	单支，右冠状动脉	1	0	0	0	0	1	1	65	0	#NULL!	#NULL!	6.4	0	154	0	0	214	0	1.03	3.77	0	2.95	1	1.03	0	1.9	0	67	1	84.9	0	376.6	0	1	0
672	张文超	2017	2017-08-03	157232	71.1	43.9	27.2	1.61397	#NULL!		#NULL!	NSTEMI	2020-10-12	单支，右冠状动脉	1	0	0	0	0	1	1	46	0	62	0	12.55	1	151	0	0	192	0	0.9	4.21	0	2.09	1	0.9	1	2.44	0	21	1	71	0	476.2	0	1	0
679	于广通	2017	2017-08-07	157589	71.2	41.3	29.9	1.38127	#NULL!		#NULL!	NSTEMI	2020-10-12	三支	0	0	1	0	0	1	1	50	0	63	0	11.31	1	119	1	1	133	0	1.17	3.46	0	0.68	0	1.17	0	1.76	0	37	1	69.4	0	357.3	0	0	1
681	张淑华	2017	2017-08-09	148606	68.7	35.1	33.6	1.04464	#NULL!		#NULL!	NSTEMI	2020-10-11	三支	0	0	1	0	0	1	0	57	0	71	0	18.76	1	152	0	0	236	0	0.86	6.33	1	2.56	1	0.86	1	4.31	1	122	1	69.1	0	310.2	0	1	1
690	王大江	2017	2017-08-15	158987	66.6	36.9	29.7	1.24242	#NULL!		#NULL!	NSTEMI	2020-10-12	双支，左前降、右冠	0	1	0	0	0	1	1	49	0	59	0	9.73	1	121	0	1	165	0	0.97	2.89	0	0.76	0	0.97	1	1.46	0	15	0	95.5	0	311.3	0	0	0
693	孙占武	2017	2017-08-10	98054	77.3	41.1	36.2	1.13536	2018-01-06	UA	#NULL!	NSTEMI	#NULL!	三支	0	0	1	0	0	1	1	67	1	64	0	7.4	0	129	0	1	193	0	0.88	4.62	0	4.08	1	0.88	1	2.58	0	8	0	44.6	0	386.2	0	1	1
697	杜玉英	2017	2017-08-08	157943	68.1	41.5	26.6	1.56015	#NULL!		#NULL!	NSTEMI	2020-10-12	单支，左前降	1	0	0	0	0	1	1	60	0	62	0	11.1	1	135	0	0	230	0	1.06	2.98	0	1.05	0	1.06	0	1.43	0	15	0	103.3	0	406.4	0	0	1
703	崔保利	2017	2017-08-22	159845	66.1	37.8	28.3	1.33569	#NULL!		#NULL!	NSTEMI	2020-10-12	双支，左前降、左回旋	0	1	0	0	0	1	1	53	0	60	0	4.48	0	149	0	0	237	0	0.94	4.4	0	2.79	1	0.94	1	2.49	0	25	1	53.9	0	349.7	0	1	0
704	王秀敏	2017	2017-08-24	18194	84	47.5	36.5	1.30137	#NULL!		#NULL!	NSTEMI	2020-10-11	三支	0	0	1	0	0	1	0	59	0	62	0	11.19	1	150	0	0	305	0	0.86	4.62	0	3.38	1	0.86	1	2.22	0	5	0	72.1	0	259	0	1	1
712	骆福名	2017	2017-08-27	160383	59	33.7	25.3	1.33202	#NULL!		#NULL!	NSTEMI	2020-10-12	单支，右冠状动脉	1	0	0	0	0	1	1	47	0	57	0	8.53	0	155	0	0	167	0	1.28	3.38	0	0.97	0	1.28	0	1.58	0	246	1	91.4	0	279.5	0	0	0
729	杜淑媛	2017	2017-09-07	161943	69.1	39.8	29.3	1.35836	#NULL!		#NULL!	NSTEMI	2020-10-14	三支	0	0	1	0	0	1	0	56	0	47	0	6.38	0	149	0	0	234	0	1.17	5.52	1	2.38	1	1.17	0	3.24	0	54.48	1	42	0	294.6	0	1	0
734	刘树军	2018	2018-01-04	177272	74.8	48.2	26.6	1.81203	#NULL!		#NULL!	NSTEMI	2020-10-12	双支，左前降、右冠	0	1	0	0	0	1	1	47	0	66	0	10.98	1	159	0	0	219	0	1.06	5.07	0	1.87	1	1.06	0	3.02	0	5	0	64	0	213.4	0	1	0
738	刘卫军	2018	2018-01-06	177506	60.5	38.4	22.1	1.73756	#NULL!		#NULL!	NSTEMI	2020-10-12	单支，右冠	1	0	0	0	0	1	1	56	0	57	0	9.17	0	127	0	1	219	0	1.35	4.37	0	0.76	0	1.35	0	2.34	0	49	1	64.05	0	283.5	0	0	0
739	王金琢	2018	2018-01-07	177596	67.9	38.9	29	1.34138	#NULL!		#NULL!	NSTEMI	2020-10-12	三支	0	0	1	0	0	1	0	71	1	56	0	6.35	0	159	0	0	215	0	0.97	4.93	0	4.22	1	0.97	1	2.04	0	69	1	39	0	268.2	0	0	1
745	董万成	2018	2018-01-04	177320	72.6	38.2	34.4	1.11047	#NULL!		#NULL!	NSTEMI	2020-10-12	三支	0	0	1	0	0	1	1	73	1	#NULL!	#NULL!	8.99	0	132	0	0	255	0	0.92	3.16	0	1.15	0	0.92	1	1.68	0	3	0	203	1	215	0	0	1
753	金云平	2018	2018-01-16	179035	69.3	37.7	31.6	1.19304	#NULL!		#NULL!	NSTEMI	2020-10-13	三支	0	0	1	0	0	1	1	76	1	38	1	11.1	1	151	0	0	236	0	1.09	4.3	0	1.85	1	1.09	0	2.38	0	333	1	58.3	0	483.8	0	1	1
764	武宪民	2018	2018-01-22	179835	73.2	41.8	31.4	1.33121	#NULL!		#NULL!	NSTEMI	2020-10-13	双支，左前降、左回旋	0	1	0	0	0	1	1	56	0	61	0	8.77	0	145	0	0	247	0	1.16	4.27	0	2.72	1	1.16	0	2.22	0	9	0	54.2	0	268	0	1	0
772	梁生	2018	2018-01-29	180809	70.72	44.96	25.76	1.74534	#NULL!		#NULL!	NSTEMI	2020-10-13	双支，左前降、右冠	0	1	0	0	0	1	1	64	0	58	0	7.98	0	143	0	0	250	0	1.41	4.08	0	4.51	1	1.41	0	1.69	0	17.59	1	58	0	556.2	1	1	1
774	姚洪利	2018	2018-01-31	181166	71.3	43.4	27.9	1.55556	#NULL!		#NULL!	NSTEMI	2020-10-13	单支，右冠	1	0	0	0	0	1	1	35	0	64	0	8.59	0	149	0	0	253	0	1.05	4.41	0	1.34	0	1.05	0	2.55	0	90.03	1	40.5	0	384	0	0	0
783	王金玉	2018	2017-12-17	172093	81.6	47.4	34.2	1.38596	#NULL!		#NULL!	NSTEMI	2020-10-12	三支	0	0	1	0	0	1	0	48	0	65	0	8.36	0	158	0	0	385	1	1.31	6.21	1	3.11	1	1.31	0	3.49	1	3	0	47.8	0	282.7	0	1	0
807	郝振生	2018	2018-02-07	181981	71.92	43.96	27.96	1.57225	#NULL!		#NULL!	NSTEMI	2020-10-13	三支	0	0	1	0	0	1	1	57	0	#NULL!	#NULL!	6.93	0	160	0	0	164	0	0.76	3.34	0	1.17	0	0.76	1	1.95	0	2.71	0	75.7	0	311.1	0	1	0
814	白占军	2018	2018-02-11	182320	76.9	45.6	31.3	1.45687	#NULL!		#NULL!	NSTEMI	2020-10-13	双支，左前降、左回旋	0	1	0	0	0	1	1	61	0	45	0	8.77	0	149	0	0	216	0	1.05	4.07	0	1.58	0	1.05	0	2.26	0	46.45	1	80	0	223	0	0	1
818	林洪义	2018	2018-02-12	182364	66.09	40.47	25.62	1.57963	#NULL!		#NULL!	NSTEMI	2020-10-13	单支，左回旋	1	0	0	0	0	1	1	46	0	58	0	11.6	1	142	0	0	195	0	1.14	3.59	0	0.49	0	1.14	0	1.91	0	16.48	1	49.5	0	313.2	0	0	0
819	沈香芝	2018	2018-02-11	182329	78	44.1	33.9	1.30088	#NULL!		#NULL!	NSTEMI	2020-10-12	三支	0	0	1	0	0	1	0	63	0	55	0	8.52	0	156	0	0	214	0	1.27	7.19	1	5.93	1	1.27	0	3.22	0	13	0	69.34	0	202.6	0	1	1
823	李淑荣	2018	2018-02-15	182575	67.3	36.03	31.27	1.15222	#NULL!		#NULL!	NSTEMI	2020-10-15	三支	0	0	1	0	0	1	0	69	1	#NULL!	#NULL!	8.18	0	146	0	0	23	0	1.15	3.81	0	0.91	0	1.15	0	2.04	0	14.97	0	74.68	0	228.92	0	0	0
835	高绍华	2018	2018-02-16	59432	77.73	43.77	33.96	1.28887	2018-06-12	陈旧性心梗	1	NSTEMI	#NULL!	三支	0	0	1	0	0	1	1	65	0	64	0	12.2	1	142	0	0	281	0	1.04	6.33	1	2.29	1	1.04	0	4	1	32.87	1	65.29	0	446	0	1	1
850	田野	2018	2018-02-22	48986	68.97	41.29	27.68	1.49169	#NULL!		#NULL!	NSTEMI	2020-10-13	三支	0	0	1	0	0	1	1	46	0	60	0	6.44	0	143	0	0	202	0	0.6	4.12	0	6.82	1	0.6	1	2.13	0	5.06	0	64.41	0	329.3	0	1	1
856	彭晓宗	2018	2018-02-26	183874	71.99	42.47	29.52	1.43869	2018-05-08	陈旧心梗 心功能III及	#NULL!	心梗愈合期	#NULL!	多支，左主干、左前降、左回旋、右冠	0	0	1	0	0	1	1	51	0	44	0	9.62	1	152	0	0	323	0	0.93	2.29	0	1.83	1	0.93	1	0.91	0	10.43	0	6.18	0	392.7	0	1	0
875	杨大森	2018	2018-03-10	185494	72.9	42.1	30.8	1.36688	2018-09-11	CHD陈旧性心梗 冠脉移植术后	#NULL!	NSTEMI	#NULL!	三支	0	0	1	0	0	1	1	53	0	56	0	10.24	1	158	0	0	276	0	0.94	5.76	1	1.95	1	0.94	1	3.93	1	10	0	81.78	0	260.2	0	1	1
895	范士庆	2018	2018-03-19	187275	69.6	40.73	28.87	1.41081	#NULL!		#NULL!	NSTEMI	2020-10-13	单支，右冠	1	0	0	0	0	1	1	57	0	54	0	10.71	1	150	0	0	239	0	0.97	4.34	0	2.65	1	0.97	1	2.43	0	7.53	0	67	0	239.5	0	1	0
897	李立新	2018	2018-03-20	174190	68.5	41.13	27.37	1.50274	2018-09-18	UA	#NULL!	NSTEMI	#NULL!	三支	0	0	1	0	0	1	1	49	0	57	0	7.72	0	157	0	0	205	1	1.04	3.34	0	2.28	1	1.04	0	1.61	0	7.93	0	81.77	0	351.9	0	1	1
903	赵玉坤	2018	2018-03-25	187998	85.04	47.26	37.78	1.25093	#NULL!		#NULL!	NSTEMI	2020-10-13	双支，左前降、左回旋	0	1	0	0	0	1	1	61	0	64	0	7.46	0	113	1	1	210	1	1.41	5.93	1	0.87	0	1.41	0	3.53	1	134.24	1	54.71	0	366.1	0	1	0
907	赵桂花	2018	2018-03-29	188581	69.74	39.67	30.07	1.31926	#NULL!		#NULL!	NSTEMI	2020-10-14	双支，左前降、左回旋	0	1	0	0	0	1	0	74	1	30	1	9.7	1	158	0	0	176	0	0.77	4.09	0	2.26	1	0.77	1	2.43	0	11.43	0	60.03	0	369.3	0	0	1
911	陈国兰	2018	2018-03-24	187943	69.22	40.92	28.3	1.44594	#NULL!		#NULL!	NSTEMI	2020-10-12	单支，左前降	1	0	0	0	0	1	0	54	0	55	0	7.48	0	135	0	0	271	0	1.06	8.28	1	5.65	1	1.06	0	4.25	1	#NULL!	#NULL!	64.85	0	470.7	0	0	1
915	池永清	2018	2018-03-21	188906	67.6	36.33	31.27	1.16182	#NULL!		#NULL!	NSTEMI	2020-10-13	三支	0	0	1	0	0	1	1	80	1	64	0	6.21	0	130	0	0	242	0	0.9	2.81	0	0.57	0	0.9	1	1.47	0	83.24	1	79.37	0	204.5	0	0	1
920	唐计祥	2018	2018-04-04	189475	67.09	37.72	29.37	1.2843	#NULL!		#NULL!	NSTEMI	2020-10-13	三支	0	0	1	0	0	1	1	74	1	49	0	8.31	0	146	0	0	183	0	1.38	4.32	0	0.65	0	1.38	0	2.29	0	173.72	1	67.2	0	162.1	0	0	1
923	吕淑云	2018	2018-04-05	189518	73.04	40.91	32.13	1.27326	#NULL!		#NULL!	NSTEMI	2020-10-12	双支，左前降、左回旋	0	1	0	0	0	1	0	74	1	56	0	9.7	1	154	0	0	344	0	1.14	4.56	0	1.45	0	1.14	0	2.76	0	23	1	62.2	0	291.6	0	0	1
925	郭晓利	2018	2018-04-07	189652	74.13	44.08	30.05	1.46689	#NULL!		#NULL!	NSTEMI	2020-10-13	三支	0	0	1	0	0	1	1	36	0	65	0	17.91	1	137	0	0	462	1	1.2	6.59	1	1.33	0	1.2	0	4.18	1	142.85	1	70	0	429.9	0	1	0
950	于兴春	2018	2018-04-19	191510	70.04	43.17	26.87	1.60662	#NULL!		#NULL!	NSTEMI	2020-10-13	多支，左主干、左前降、左回旋、右冠	0	0	1	0	0	1	1	63	0	63	0	4.7	0	149	0	0	225	0	1.57	4.44	0	0.65	0	1.57	0	2.23	0	27.37	1	74.02	0	124.3	0	0	0
951	胡瑞	2018	2018-04-20	191701	70.06	41.61	28.45	1.46257	#NULL!		#NULL!	NSTEMI	2020-10-13	单支，左前降	1	0	0	0	0	1	1	63	0	63	0	4.55	0	153	0	0	213	0	1.63	3.94	0	1.15	0	1.63	0	1.73	0	27.98	1	66.66	0	367.5	0	0	1
954	王清章	2018	2018-04-25	192269	78.1	45.2	32.9	1.37386	2018-07-03	陈旧性心梗	#NULL!	NSTEMI	#NULL!	单支，左回旋	1	0	0	0	0	1	1	78	1	46	0	8.59	0	157	0	0	147	0	1.43	4.12	0	2.05	1	1.43	0	1.95	0	28.32	1	80.01	0	553	1	1	0
959	刘尚明	2018	2018-04-24	192203	74.24	42.56	31.68	1.34343	#NULL!		#NULL!	NSTEMI	2020-10-13	双支，左前降、左回旋	0	1	0	0	0	1	1	49	0	59	0	7.86	0	148	0	0	322	0	0.98	5.06	0	2.47	1	0.98	1	3.02	0	17.36	1	99	0	278.5	0	1	0
968	杨希满	2018	2018-04-22	191786	69.32	41.09	28.23	1.45554	#NULL!		#NULL!	NSTEMI	2020-10-13	双支，左回旋、右冠	0	1	0	0	0	1	1	63	0	#NULL!	#NULL!	9.89	1	150	0	0	222	0	0.69	4.56	0	7.01	1	0.69	1	2.4	0	91.11	1	89.59	0	271.1	0	1	1
969	梁君	2018	2018-04-25	192337	73.4	40.75	32.65	1.24809	#NULL!		#NULL!	陈旧性心梗	2020-10-13	三支	0	0	1	0	0	1	1	59	0	59	0	5.43	0	175	0	0	338	0	0.81	3.53	0	2.79	1	0.81	1	1.9	0	7.19	0	63.51	0	335.3	0	1	1
978	马海山	2018	2018-05-02	178117	81.69	46.55	35.14	1.3247	#NULL!		#NULL!	陈旧性心梗、室壁瘤形成	2020-10-13	三支	0	0	1	0	0	1	1	55	0	49	0	8.72	0	153	0	0	283	0	0.84	4.78	0	2.14	1	0.84	1	2.94	0	13.4	0	64.33	0	464.1	0	1	1
988	王占东	2018	2018-05-07	194000	68.59	39.71	28.88	1.375	#NULL!		#NULL!	NSTEMI	2020-10-13	单支，左前降	1	0	0	0	0	1	1	41	0	#NULL!	#NULL!	8.12	0	127	0	1	282	0	1.22	4.96	0	1.2	0	1.22	0	2.87	0	64.52	1	54.9	0	652.7	1	0	1
990	徐文海	2018	2018-05-08	194185	75.5	43.3	32.2	1.34472	2018-08-08	窦缓	#NULL!	NSTEMI	2020-10-13	三支	0	0	1	0	0	1	1	57	0	68	0	8.47	0	151	0	0	156	0	1.17	4.3	0	0.61	0	1.17	0	2.44	0	49.54	1	65.67	0	366	0	0	1
992	黄玉有	2018	2018-05-07	193771	72.14	41.81	30.33	1.3785	#NULL!		#NULL!	NSTEMI	2020-10-13	三支	0	0	1	0	0	1	1	46	0	41	0	8.5	0	168	0	0	298	0	1.14	3.2	0	1.14	0	1.14	0	1.53	0	19.89	1	74	0	359.9	0	0	0
993	王子泉	2018	2018-05-07	193886	70.3	41.5	28.8	1.44097	#NULL!		#NULL!	NSTEMI	2020-10-13	双支，左前降、右冠	0	1	0	0	0	1	1	64	0	43	0	9.75	1	116	0	1	174	0	1.89	3.87	0	2.97	1	1.89	0	1.29	0	25.79	1	56.6	0	188	0	1	1
1021	梁博志	2018	2018-05-28	197010	68.36	42.22	26.14	1.61515	#NULL!		#NULL!	NSTEMI	2020-10-14	三支	0	0	1	0	0	1	1	49	0	57	0	7.21	0	161	0	0	200	0	0.73	3.25	0	2.47	1	0.73	1	1.77	0	52.82	1	74.03	0	225.4	0	1	0
1029	付淑芹	2018	2018-05-28	196995	67.1	41	26.1	1.57088	#NULL!		#NULL!	NSTEMI	2020-10-12	双支，左前降、左回旋	0	1	0	0	0	1	0	58	0	63	0	6.37	0	138	0	0	267	0	0.98	3.33	0	2.41	1	0.98	1	1.64	0	52	1	40.28	0	174.8	0	1	1
1033	王艳珠	2018	2018-06-04	168814	86.25	43.71	42.54	1.0275	#NULL!		#NULL!	NSTEMI	2020-10-14	三支	0	0	1	0	0	1	0	67	1	30	1	14.93	1	132	0	0	284	0	0.87	4.22	0	1.38	0	0.87	1	2.54	0	159.16	1	57.97	0	285.3	0	1	1
1041	韩铁松	2018	2018-06-10	198763	68.45	38.81	29.64	1.30938	2018-07-23	NSTEMI恢复期、心律失常 心房扑动 心房颤动	#NULL!	NSTEMI	#NULL!	单支，左回旋	1	0	0	0	0	1	1	69	1	58	0	6.98	0	134	0	0	131	0	2.24	3.19	0	0.52	0	2.24	0	0.71	0	39.5	1	77.5	0	439.8	0	0	1
1051	于素珍	2018	2018-05-26	196697	81.37	43.89	37.48	1.17102	#NULL!		#NULL!	NSTEMI	2020-10-14	双支，左前降、左回旋	0	1	0	0	0	1	0	66	1	46	0	11.23	1	170	0	0	289	0	1.53	4.83	0	0.73	0	1.53	0	2.57	0	13.63	0	59.6	0	238	0	1	1
1056	娄玉华	2018	2018-06-03	197729	61	36.08	24.92	1.44783	#NULL!		#NULL!	NSTEMI	2020-10-12	三支	0	0	1	0	0	1	0	68	1	61	0	6.32	0	162	0	0	199	0	1.71	7.64	1	0.65	0	1.71	0	4.68	1	81	1	62.79	0	373	0	1	1
1059	于广艳	2018	2018-06-12	199178	70.3	39.8	30.5	1.30492	#NULL!		#NULL!	NSTEMI	2020-10-12	双支，左前降、左主干	0	1	0	0	0	1	0	59	0	56	0	4.58	0	120	0	1	164	0	0.94	4.99	0	1.25	0	0.94	1	3.12	0	8	0	43.4	0	375.4	0	0	1
1060	姜玉荣	2018	2018-06-07	198483	63.5	36.8	26.7	1.37828	2018-02-27	UA	#NULL!	NSTEMI	#NULL!	双支，左前降、左回旋	0	1	0	0	0	1	0	68	1	57	0	5.77	0	151	0	0	201	1	1.2	4.3	0	1.68	0	1.2	0	2.31	0	8	0	110	0	289.6	0	1	1
1064	李兴宇	2018	2018-06-19	199797	62.49	36.66	25.83	1.41928	#NULL!		#NULL!	NSTEMI	2020-10-14	三支	0	0	1	0	0	1	1	53	0	41	0	6.5	0	130	0	0	206	1	0.68	3.43	0	2.24	1	0.68	1	1.98	0	22.62	1	63.4	0	474.9	0	1	1
1067	田秀芹	2018	2018-06-17	199724	65.49	37.1	28.39	1.3068	#NULL!		#NULL!	NSTEMI	2020-10-12	三支	0	0	1	0	0	1	0	56	0	59	0	6.97	0	150	0	0	207	1	#NULL!	#NULL!	0	#NULL!	0	#NULL!	1	#NULL!	0	#NULL!	#NULL!	69.44	0	357.1	0	1	1
1071	赵云	2018	2018-06-21	200415	71.44	41.58	29.86	1.3925	#NULL!		#NULL!	NSTEMI	2020-10-14	单支，左前降	1	0	0	0	0	1	1	34	0	44	0	14.1	1	153	0	0	210	1	1.09	4.33	0	0.62	0	1.09	0	2.53	0	31.16	1	67.33	0	486.3	0	0	0
1072	徐国强	2018	2018-06-23	200561	68.7	40.09	28.61	1.40126	#NULL!		#NULL!	NSTEMI	2020-10-14	三支	0	0	1	0	0	1	1	38	0	64	0	11.44	1	140	0	0	274	0	1.26	4.12	0	1.77	1	1.26	0	2.11	0	43.56	1	50.1	0	248	0	1	0
1082	刘海利	2018	2018-07-01	201618	67.69	37.22	30.47	1.22153	#NULL!		#NULL!	NSTEMI	2020-10-14	三支	0	0	1	0	0	1	1	44	0	55	0	13.41	1	153	0	0	221	0	0.79	3.27	0	1.3	0	0.79	1	1.85	0	120.44	1	61.3	0	364.8	0	1	1
1085	李玉春	2018	2018-06-17	171873	53.9	34.3	19.6	1.75	#NULL!		#NULL!	NSTEMI	2020-10-14	双支，左前降、右冠	0	1	0	0	0	1	1	63	0	65	0	9.81	1	137	0	0	141	0	1.13	4.13	0	0.94	0	1.13	0	2.31	0	129.55	1	78.92	0	337.5	0	0	1
1089	宁利民	2018	2018-07-07	202404	74.95	42.7	32.25	1.32403	#NULL!		#NULL!	NSTEMI	2020-10-14	双支，右冠、左前降	0	1	0	0	0	1	1	53	0	54	0	9.5	0	152	0	0	165	0	1.17	4.57	0	3.9	1	1.17	0	2.33	0	32.66	1	74.53	0	361.8	0	1	1
1091	杨光	2018	2018-07-09	202669	70.54	43.01	27.53	1.5623	#NULL!		#NULL!	NSTEMI	2020-10-14	单支，左前降	1	0	0	0	0	1	1	40	0	65	0	12.64	1	126	0	1	276	0	1.48	3.9	0	4.32	1	1.48	0	1.5	0	20.43	1	61.9	0	606.2	1	1	1
1098	徐桂芝	2018	2018-07-12	203250	67.39	37.11	30.28	1.22556	#NULL!		#NULL!	NSTEMI	2020-10-12	单支，右冠	1	0	0	0	0	1	0	64	0	55	0	10.44	1	131	0	0	226	0	1.21	4.83	0	3.92	1	1.21	0	2.5	0	9	0	56.36	0	220	0	1	1
1103	李振东	2018	2018-07-15	203543	69	41.73	27.27	1.53025	#NULL!		#NULL!	NSTEMI	2020-10-14	双支，左前降、右冠	0	1	0	0	0	1	1	46	0	#NULL!	#NULL!	18.19	1	141	0	0	216	0	1	3.59	0	1.46	0	1	0	1.93	0	10.41	0	65.77	0	330.6	0	0	0
1107	亢树杰	2018	2018-07-18	62848	69.66	40.25	29.41	1.36858	#NULL!		#NULL!	NSTEMI	2020-10-14	双支，左前降、右冠	0	1	0	0	0	1	1	44	0	53	0	8.26	0	135	0	0	243	0	1.45	4.22	0	1.6	0	1.45	0	2.06	0	49.77	1	57.06	0	356.4	0	0	0
1117	白桂莲	2018	2018-07-20	204428	76.73	45.23	31.5	1.43587	#NULL!		#NULL!	NSTEMI	2020-10-19	单支，左前降	1	0	0	0	0	1	0	67	1	62	0	6.57	0	129	0	1	281	0	1.34	4.76	0	2.2	1	1.34	0	2.52	0	16	0	94.78	0	315.1	0	1	1
1120	高汉杰	2018	2015-12-25	4010	66.4	35.5	30.9	1.14887	2018-07-23	UA	1	NSTEMI	#NULL!	双支，左回旋、左前降	0	1	0	0	0	1	1	64	0	63	0	5.39	0	116	0	1	176	0	0.62	2.42	0	1.71	1	0.62	1	1.02	0	13	0	40	0	371	0	1	1
1137	王立新	2018	2018-07-31	206019	76.29	44.49	31.8	1.39906	#NULL!		#NULL!	NSTEMI	2020-10-14	单支，左前降	1	0	0	0	0	1	1	39	0	68	0	6.43	0	158	0	0	180	1	0.88	3.92	0	2.04	1	0.88	1	2.23	0	36.13	1	88.7	0	388	0	1	1
1144	迟桂林	2018	2018-08-06	206858	74.2	40.3	33.9	1.18879	#NULL!		#NULL!	NSTEMI	2020-10-14	三支	0	0	1	0	0	1	1	66	1	55	0	6.12	0	130	0	0	208	1	1.18	4.08	0	0.67	0	1.18	0	2.25	0	34.43	1	54.77	0	489	0	0	1
1146	钟德财	2018	2018-08-06	207014	74.36	43.35	31.01	1.39794	2018-09-11	陈旧性心梗	1	NSTEMI	#NULL!	三支	0	0	1	0	0	1	1	62	0	56	0	9.32	0	127	0	1	168	0	1.09	3.56	0	0.67	0	1.09	0	1.91	0	122.42	1	91.12	0	390	0	0	1
1147	孔令刚	2018	2018-08-06	206892	61.69	36.75	24.94	1.47354	#NULL!		#NULL!	NSTEMI	2020-10-14	双支，左前降、左前降	0	1	0	0	0	1	1	49	0	61	0	5.96	0	145	0	0	260	1	0.85	4.02	0	2.39	1	0.85	1	2.3	0	13.11	0	72.6	0	265.8	0	1	0
1149	张志福	2018	2018-08-07	207059	67.56	42.45	25.11	1.69056	#NULL!		#NULL!	NSTEMI	2020-10-14	双支，左前降、左回旋	0	1	0	0	0	1	1	55	0	56	0	6.52	0	156	0	0	252	0	1.22	5.16	0	2.33	1	1.22	0	2.92	0	8.34	0	112	1	535	1	1	1
1150	朱凤强	2018	2018-08-02	206391	71.2	44.9	26.3	1.70722	#NULL!		#NULL!	NSTEMI	2020-10-14	单支，左前降	1	0	0	0	0	1	1	73	1	58	0	6.14	0	142	0	0	165	0	1.1	4.58	0	1.24	0	1.1	0	2.34	0	#NULL!	#NULL!	68.7	0	539	1	0	1
1152	杨凤启	2018	2018-08-09	207415	74.4	43.3	31.1	1.39228	#NULL!		#NULL!	NSTEMI	2020-10-14	单支，左前降	1	0	0	0	0	1	1	47	0	64	0	7.52	0	129	0	1	201	1	1.31	3.45	0	0.66	0	1.31	0	1.65	0	18.81	1	75.11	0	260	0	0	0
1158	康保林	2018	2018-08-15	208055	73.3	40.1	33.2	1.20783	#NULL!		#NULL!	NSTEMI	2020-10-14	三支	0	0	1	0	0	1	1	61	0	48	0	7.11	0	142	0	0	212	0	1.43	5.3	1	1.14	0	1.43	0	2.98	0	6.06	0	47.08	0	432	0	1	1
1168	陈艳东	2018	2018-08-22	209382	77.15	44.99	32.16	1.39894	#NULL!		#NULL!	NSTEMI	2020-10-14	双支，左前降、右冠	0	1	0	0	0	1	1	38	0	57	0	12.16	1	126	0	1	264	0	0.74	5.33	1	0.7	0	0.74	1	3.6	1	237.97	1	50	0	377.4	0	1	0
1172	辛凤英	2018	2018-08-19	80771	76.76	43	33.76	1.2737	2018-01-30	UA	1	NSTEMI	#NULL!	三支	0	0	1	0	0	1	0	65	0	72	0	5.65	0	125	0	1	255	0	0.76	4.62	0	4.01	1	0.76	1	2.69	0	5	0	59.6	0	265.2	0	1	1
1179	刘善元	2018	2018-05-10	194385	75.89	44.29	31.6	1.40158	2018-08-28	陈旧性心梗	1	NSTEMI	#NULL!	三支	0	0	1	0	0	1	1	69	1	60	0	5.13	0	157	0	0	170	1	1.15	4.79	0	1.11	0	1.15	0	2.8	0	10.72	0	73.07	0	375.6	0	0	1
1181	刘贵福	2018	2018-08-27	48066	74.14	42.51	31.63	1.34398	2018-12-04	鼻出血	#NULL!	NSTEMI	2020-10-14	三支	0	0	1	0	0	1	1	60	0	41	0	8.34	0	134	0	0	192	0	0.99	6.36	1	4.11	1	0.99	1	3.89	1	14.37	0	70.63	0	185	0	1	0
1182	马淑芹	2018	2018-08-21	209179	76.94	42.95	33.99	1.26361	#NULL!		#NULL!	NSTEMI	2020-10-13	双支，左前降、左回旋	0	1	0	0	0	1	0	72	1	56	0	10.65	1	124	0	1	208	1	1.95	5.26	1	0.39	0	1.95	0	2.61	0	75.68	1	68.93	0	243.6	0	1	1
1188	张明利	2018	2018-09-02	210759	65.9	38.98	26.92	1.44799	#NULL!		#NULL!	NSTEMI	2020-10-14	单支，右冠	1	0	0	0	0	1	1	45	0	61	0	15.91	1	151	0	0	246	0	1.59	4.29	0	0.6	0	1.59	0	2.1	0	128.36	1	70	0	385	0	0	1
1193	敖建刚	2018	2018-08-28	210178	74.25	43.17	31.08	1.389	#NULL!		#NULL!	NSTEMI	2020-10-14	单支，左前降	1	0	0	0	0	1	1	51	0	54	0	9.24	0	160	0	0	232	0	1.11	4.57	0	0.91	0	1.11	0	2.68	0	70.95	1	67.19	0	341.5	0	0	0
1200	曹俭	2018	2018-09-08	211715	65.78	38.22	27.56	1.38679	2018-09-25	HF	#NULL!	NSTEMI	#NULL!	单支，左回旋	1	0	0	0	0	1	1	69	1	45	0	9.36	0	139	0	0	146	0	1.18	3.61	0	0.75	0	1.18	0	1.87	0	74.97	1	66.61	0	352.3	0	0	0
1234	蔡凤信	2018	2018-09-28	214274	67.88	42.66	25.22	1.69151	#NULL!		#NULL!	NSTEMI	2020-10-15	单支，左前降	1	0	0	0	0	1	1	49	0	56	0	5.95	0	168	0	0	188	0	0.97	3.92	0	1.82	1	0.97	1	2.18	0	13.14	0	54.32	0	465.8	0	1	1
1238	赵永明	2018	2018-09-28	82734	62	38.17	23.83	1.60176	#NULL!		#NULL!	NSTEMI	2020-10-15	三支	0	0	1	0	0	1	1	65	0	61	0	6.81	0	133	0	0	145	0	0.89	3.95	0	1.05	0	0.89	1	2.34	0	13.92	0	82.3	0	286.8	0	0	1
1253	梁素珍	2018	2018-10-13	216095	70.17	38.49	31.68	1.21496	2018-12-05	陈旧性心梗	1	NSTEMI	#NULL!	双支，左前降、左回旋	0	1	0	0	0	1	0	63	0	48	0	12.5	1	166	0	0	360	1	0.96	5.9	1	1.32	0	0.96	1	3.82	1	20.38	1	69	0	247.28	0	1	1
1263	孙青春	2018	2018-10-23	217577	71.06	43.44	27.62	1.57277	#NULL!		#NULL!	NSTEMI	2020-10-15	双支，左前降、右冠	0	1	0	0	0	1	1	54	0	56	0	8.31	0	155	0	0	233	0	1.03	5.8	1	1.46	0	1.03	0	3.67	1	68.8	1	81	0	404.48	0	1	1
1272	张晓健	2018	2016-07-19	109758	65.3	38.7	26.6	1.45489	#NULL!		#NULL!	NSTEMI	2020-10-13	单支，右冠	1	0	0	0	0	1	0	67	1	66	0	4.79	0	98	1	1	241	0	1.3	7.4	1	1.66	0	1.3	0	4.71	1	2.7	0	58.1	0	342.4	0	1	1
1274	李强	2018	2018-10-26	218007	70.5	42.4	28.1	1.5089	#NULL!		#NULL!	NSTEMI	2020-10-15	双支，左回旋、右冠	0	1	0	0	0	1	1	64	0	56	0	7.95	0	142	0	0	168	0	1.37	5.65	1	2.01	1	1.37	0	3.22	0	29.86	1	91.53	0	262	0	1	0
1288	李淑花	2018	2018-11-01	218767	73.01	43.12	29.89	1.44262	#NULL!		#NULL!	NSTEMI	2020-10-15	三支	0	0	1	0	0	1	0	75	1	46	0	8.3	0	122	0	1	220	1	1.34	5.62	1	0.75	0	1.34	0	3.35	0	438.26	1	54	0	313.25	0	0	1
1290	曾庆普	2018	2018-11-09	219937	69.7	36.8	32.9	1.11854	#NULL!		#NULL!	NSTEMI	2020-10-15	三支	0	0	1	0	0	1	1	78	1	45	0	10.49	1	160	0	0	212	0	1.25	5.11	0	0.86	0	1.25	0	3	0	267.24	1	56.9	0	265	0	0	0
1293	闫树华	2018	2018-11-12	220082	72.74	43.92	28.82	1.52394	#NULL!		#NULL!	NSTEMI	2020-10-15	双支，左前降、左回旋	0	1	0	0	0	1	1	61	0	57	0	12.9	1	160	0	0	183	0	1.17	4.26	0	0.42	0	1.17	0	2.43	0	249	1	94.3	0	373.48	0	0	1
1296	王玉才	2018	2018-11-13	220534	67.81	39.27	28.54	1.37596	#NULL!		#NULL!	NSTEMI	2020-10-15	三支	0	0	1	0	0	1	1	60	0	63	0	7.81	0	156	0	0	329	0	1.49	3.56	0	0.4	0	1.49	0	1.62	0	79.31	1	74.5	0	295.51	0	0	1
1304	靳玉霞	2018	2018-11-18	221140	71.71	40.94	30.77	1.33052	#NULL!		#NULL!	NSTEMI	2020-10-13	三支	0	0	1	0	0	1	0	54	0	57	0	8.7	0	165	0	0	274	0	1.3	4.72	0	1.25	0	1.3	0	2.61	0	25.23	1	79.8	0	187.4	0	0	1
1314	王云田	2018	2018-11-22	221845	63.8	38	25.8	1.47287	#NULL!		#NULL!	NSTEMI	2020-10-15	三支	0	0	1	0	0	1	1	69	1	64	0	7.54	0	149	0	0	167	0	1.21	5.56	1	1.57	0	1.21	0	3.32	0	66.43	1	79.9	0	499	0	1	1
1315	李宝华	2018	2018-11-23	95636	70.47	41.56	28.91	1.43756	#NULL!		#NULL!	NSTEMI	2020-10-15	三支	0	0	1	0	0	1	1	61	0	62	0	5.98	0	149	0	0	209	1	0.73	4.84	0	1.96	1	0.73	1	3.09	0	26.51	1	56.2	0	334.59	0	1	1
1318	陈宝玉	2018	2018-11-25	222113	70.07	38.79	31.28	1.24009	2018-12-24	UA	#NULL!	NSTEMI	#NULL!	三支	0	0	1	0	0	1	1	71	1	39	1	8	0	163	0	0	177	0	0.84	5.34	1	1.55	0	0.84	1	3.45	1	43.8	1	41.1	0	497.22	0	1	0
1321	王彩霞	2018	2018-11-28	222636	92.61	46.94	45.67	1.02781	#NULL!		#NULL!	NSTEMI	2020-10-13	三支	0	0	1	0	0	1	0	65	0	68	0	7.1	0	146	0	0	322	0	0.95	4.05	0	1.8	1	0.95	1	2.3	0	6.44	0	45.2	0	166.2	0	1	0
1324	张秀媛	2018	2018-11-22	128800	65.34	36.42	28.92	1.25934	#NULL!		#NULL!	NSTEMI	2020-10-13	三支	0	0	1	0	0	1	0	77	1	62	0	6.14	0	182	0	0	241	0	1.59	6.73	1	1.35	0	1.59	0	3.98	1	645.12	1	76.4	0	302.1	0	0	1
1325	牛琪	2018	2018-11-25	222101	81.34	45.2	36.14	1.25069	2018-12-09	NSTEMI愈合期	#NULL!	NSTEMI	#NULL!	三支	0	0	1	0	0	1	1	51	0	63	0	10.95	1	160	0	0	232	0	0.75	4.32	0	1.72	1	0.75	1	2.68	0	44.16	1	85.5	0	406.46	0	1	0
1341	徐建华	2018	2018-12-04	223576	68.08	42.03	26.05	1.61344	#NULL!		#NULL!	NSTEMI	2020-10-15	三支	0	0	1	0	0	1	1	55	0	62	0	6.4	0	127	0	1	250	0	0.82	3.83	0	2.26	1	0.82	1	2.18	0	13.12	0	59.2	0	446.44	0	1	1
1344	李凤兰	2018	2018-12-02	223140	73.2	42.27	30.93	1.36663	#NULL!		#NULL!	NSTEMI	2020-10-13	三支	0	0	1	0	0	1	0	71	1	65	0	8.7	0	140	0	0	240	0	1.3	4.39	0	3.68	1	1.3	0	2.1	0	14.05	0	58.09	0	355	0	1	0
1351	宋宏欣	2018	2018-12-11	224531	70.67	42.05	28.62	1.46925	#NULL!		#NULL!	NSTEMI	2020-10-16	三支	0	0	1	0	0	1	1	47	0	70	0	4.49	0	137	0	0	190	0	1.41	3.73	0	1.77	1	1.41	0	1.68	0	21.79	1	54	0	285.23	0	1	0
1361	张淑芹	2018	2018-12-17	106418	70.22	42.57	27.65	1.5396	#NULL!		#NULL!	NSTEMI	2020-10-13	双支，右冠、左回旋	0	1	0	0	0	1	0	72	1	58	0	5.43	0	159	0	0	233	0	1.3	3.5	0	2.56	1	1.3	0	1.5	0	2.71	0	117.6	1	200.4	0	1	0
1363	王树新	2018	2018-12-19	225854	63.44	37.03	26.41	1.40212	#NULL!		#NULL!	NSTEMI	2020-10-15	三支	0	0	1	0	0	1	1	53	0	60	0	9.61	1	164	0	0	210	0	0.86	4.87	0	0.59	0	0.86	1	3.15	0	350.62	1	75.3	0	296.07	0	0	0
1369	金永富	2018	2018-12-24	226509	63.86	38.22	25.64	1.49064	#NULL!		#NULL!	NSTEMI	2020-10-15	三支	0	0	1	0	0	1	1	67	1	74	0	8.94	0	142	0	0	176	0	1.21	3.61	0	0.9	0	1.21	0	1.83	0	27.34	1	50.2	0	218.19	0	0	1
1373	张国成	2018	2018-12-23	226221	74.02	43.81	30.21	1.45018	#NULL!		#NULL!	NSTEMI	2020-10-16	双支，左前降、右冠	0	1	0	0	0	1	1	63	0	63	0	6.29	0	158	0	0	246	0	1.02	5.17	0	4.51	1	1.02	0	2.87	0	71.91	1	71.6	0	421.05	0	1	0
1	王青山	2016	2016-01-02	86894	69.7	39.4	30.3	1.30033	#NULL!		#NULL!	STEMI	2020-10-09	左主干	0	0	1	0	1	0	1	46	0	55	0	14.75	1	134	0	0	283	0	0.93	3.29	0	0.81	0	0.93	1	1.99	0	16	0	71.1	0	319.8	0	0	1
2	王树海	2016	2016-01-04	13828	71.8	41.7	30.1	1.38538	#NULL!		#NULL!	STEMI	2020-10-09	左回旋支	1	0	0	0	1	0	1	56	0	48	0	9.49	0	144	0	0	217	0	1.23	4.59	0	0.91	0	1.23	0	2.95	0	20	1	50.9	0	177	0	0	1
3	孙常海	2016	2016-01-05	87245	66.1	41.4	24.7	1.67611	2016-11-21	UA	#NULL!	STEMI	#NULL!	右冠	1	0	0	0	1	0	1	53	0	63	0	6.57	0	143	0	0	191	0	1.01	4.98	0	1.08	0	1.01	0	2.87	0	#NULL!	#NULL!	67.26	0	231.8	0	0	1
5	夏廷义	2016	2016-01-05	79629	74.2	43.1	31.1	1.38585	#NULL!		#NULL!	STEMI	2020-10-09	左回旋支	1	0	0	0	1	0	1	69	1	57	0	5.67	0	145	0	0	212	0	0.58	2.83	0	0.94	0	0.58	1	1.4	0	#NULL!	#NULL!	66.5	0	293.1	0	1	1
6	张志国	2016	2015-12-28	86558	63.3	35.6	27.7	1.2852	#NULL!		#NULL!	STEMI	2020-10-09	左回旋支	1	0	0	0	1	0	1	45	0	48	0	5	0	151	0	0	313	0	0.51	2.92	0	1.3	0	0.51	1	1.82	0	#NULL!	#NULL!	92.8	0	433.6	0	1	0
9	杨占阁	2016	2016-01-11	87818	73.9	44.4	29.5	1.50508	#NULL!		#NULL!	STEMI	2020-10-09	左前降支	1	0	0	0	1	0	1	59	0	67	0	6.43	0	153	0	0	119	0	1.17	4.52	0	2.08	1	1.17	0	2.4	0	8	0	75.9	0	291.2	0	1	0
10	王桂云	2016	2018-10-25	88237	72.9	39.8	33.1	1.20242	#NULL!		#NULL!	STEMI	2020-10-15	左前降支	1	0	0	0	1	0	0	45	0	#NULL!	#NULL!	15.85	#NULL!	143	0	0	25	0	1.15	3.45	0	0.52	0	1.15	0	1.79	0	151.07	1	48	0	435	0	1	1
17	王显稳	2016	2016-01-17	88569	64	38.7	25.3	1.52964	#NULL!		#NULL!	STEMI	2020-10-09	右冠	1	0	0	0	1	0	1	62	0	60	0	9.68	1	150	0	0	251	0	1.39	5.92	1	1.41	0	1.39	0	3.89	1	92	1	78.8	0	224.9	0	1	0
21	史万富	2016	2016-01-16	88528	67.6	42.1	25.5	1.65098	2016-01-29	STEMI恢复期	1	STEMI	#NULL!	右冠	1	0	0	0	1	0	1	62	0	43	0	14.57	1	138	0	0	161	0	1.49	2.88	0	0.96	0	1.49	0	0.95	0	147	1	97	0	329.8	0	0	1
29	郭万财	2016	2016-02-04	90167	71.4	42.1	29.3	1.43686	#NULL!		#NULL!	STEMI	2020-10-09	双支病变、左前降支、右冠	0	1	0	0	1	0	1	72	1	63	0	8.37	0	139	0	0	248	0	1.19	6.69	1	2.36	1	1.19	0	4.43	1	49	1	89.4	0	291.1	0	1	1
30	李全顺	2016	#NULL!	90439	74.2	42.6	31.6	1.3481	#NULL!		#NULL!	STEMI	2020-10-09	右冠	1	0	0	0	1	0	1	60	0	#NULL!	#NULL!	6.6	#NULL!	164	0	0	157	0	1.12	4.45	0	2.46	1	1.12	0	2.21	0	17	1	90.23	0	332.5	0	1	0
31	程雨	2016	2016-02-12	90509	64.5	37.9	26.6	1.42481	#NULL!		#NULL!	STEMI	2020-10-09	三支病变	0	0	1	0	1	0	1	56	0	56	0	16.19	1	136	0	0	154	0	1.08	4.33	0	2.06	1	1.08	0	2.31	0	140	1	135.3	1	473.3	0	1	0
32	马彦平	2016	2016-01-25	89487	79.1	44.9	34.2	1.31287	#NULL!		#NULL!	STEMI	2020-10-09	双支，左前降、右冠	0	1	0	0	1	0	1	59	0	60	0	13.82	1	127	0	1	279	0	1.08	3.06	0	2	1	1.08	0	1.07	0	134	1	63.3	0	274.6	0	1	1
34	姜凤莲	2016	2016-02-14	90591	79.4	48	31.4	1.52866	#NULL!		#NULL!	STEMI	2020-10-09	单支，右冠	1	0	0	0	1	0	0	54	0	66	0	6.22	0	152	0	0	180	0	1.17	3.91	0	1.55	0	1.17	0	2.04	0	14	0	69.3	0	233.6	0	1	1
39	孙瑞军	2016	2016-01-30	89905	68.7	37.9	30.8	1.23052	#NULL!		#NULL!	STEMI	2020-10-09	单支，左前降	1	0	0	0	1	0	1	41	0	53	0	13.42	1	165	0	0	226	0	1.31	3.97	0	2.22	1	1.31	0	1.65	0	115	1	80.5	0	401.7	0	1	0
45	徐宝华	2016	2016-02-16	86015	74.4	42	32.4	1.2963	#NULL!		#NULL!	STEMI	2020-10-13	三支	0	0	1	0	1	0	0	63	0	42	0	7.81	0	131	0	0	213	0	1.57	4.17	0	0.78	0	1.57	0	2	0	139.21	1	42.36	0	177.3	0	1	0
46	杨立锐	2016	2016-02-18	91536	65.6	39.5	26.1	1.51341	#NULL!		#NULL!	STEMI	2020-10-09	右冠	1	0	0	0	1	0	1	33	0	59	0	9.8	1	184	0	0	298	0	0.74	4.81	0	1.84	1	0.74	1	3.23	0	22	1	73.1	0	331.5	0	1	0
48	于军	2016	2016-02-20	91729	84.2	47.6	36.6	1.30055	2017-08-14	UA	#NULL!	STEMI	#NULL!	三支	0	0	1	0	1	0	1	41	0	61	0	11.12	1	183	0	0	223	0	1.1	5.24	1	4.16	1	1.1	0	2.25	0	16	0	73	0	454.3	0	1	1
50	李晓梅	2016	2016-02-19	91646	73.1	41.4	31.7	1.30599	#NULL!		#NULL!	STEMI	2020-10-13	双支，左前降、右冠	0	1	0	0	1	0	0	50	0	47	0	10.23	1	172	0	0	308	0	0.88	2.67	0	1.24	0	0.88	1	1.31	0	9.69	0	63	0	254	0	1	1
51	李彦强	2016	2016-02-12	90486	67.1	37.8	29.3	1.2901	#NULL!		#NULL!	STEMI	2020-10-19	三支	0	0	1	0	1	0	1	53	0	45	0	12.47	1	133	0	0	286	0	1.38	3.82	0	1.11	0	1.38	0	1.94	0	47	1	67.2	0	395.6	0	0	0
54	李淑环	2016	2016-02-13	90536	78.3	46.4	31.9	1.45455	#NULL!		#NULL!	STEMI	2020-10-13	单支，左前降	1	0	0	0	1	0	0	60	0	44	0	8.4	0	144	0	0	215	0	1.09	6.23	1	3.52	1	1.09	0	3.76	1	8.15	0	63.13	0	338.8	0	1	1
55	董延安	2016	2016-02-22	34170	66.9	40.5	26.4	1.53409	#NULL!		#NULL!	STEMI	2020-10-09	三支	0	0	1	0	1	0	1	63	0	52	0	6.22	0	156	0	0	222	0	1	3.41	0	1.2	0	1	0	1.86	0	16	0	103.9	0	451.4	0	0	1
56	杨柱国	2016	2016-02-20	91754	67.6	37.4	30.2	1.23841	#NULL!		#NULL!	STEMI	2020-10-09	单支，回旋支	1	0	0	0	1	0	1	47	0	47	0	6.72	0	153	0	0	287	0	0.83	3.43	0	1.52	0	0.83	1	1.91	0	9	0	65.6	0	252.1	0	0	0
59	赵奎英	2016	2016-02-14	4942	57.1	32.7	24.4	1.34016	2018-12-10	陈旧性心梗	#NULL!	STEMI	#NULL!	三支	0	0	1	0	1	0	1	62	0	52	0	11.5	1	140	0	0	173	0	1.06	3.49	0	1.19	0	1.06	0	1.89	0	19	1	113.2	1	362.7	0	0	0
61	赵秋伶	2016	2016-02-16	91920	81.1	44	37.1	1.18598	2017-04-28	陈旧性下壁、正后壁ST段抬高型心肌梗死	0	STEMI	#NULL!	双支，左前降、右冠	0	1	0	0	1	0	0	52	0	67	0	12.3	1	131	0	0	223	0	1.19	3.86	0	1.81	1	1.19	0	1.85	0	#NULL!	#NULL!	73.1	0	240.9	0	1	1
62	袁成才	2016	2016-03-03	93404	72.8	35.9	36.9	0.9729	#NULL!		#NULL!	STEMI	2020-10-09	三支，左主干、左前降、左回旋、右冠	0	0	1	0	1	0	1	64	0	40	0	9.8	1	146	0	0	218	0	1.36	4.44	0	0.61	0	1.36	0	2.8	0	26	1	103.1	0	438.9	0	0	1
64	何英军	2016	2016-03-04	93480	68.7	40.9	27.8	1.47122	#NULL!		#NULL!	STEMI	2020-10-09	单支，前降支	1	0	0	0	1	0	1	41	0	63	0	16.48	1	163	0	0	246	0	1	2.85	0	1.2	0	1	0	1.3	0	19	1	97.7	0	316.5	0	0	1
66	王爱宝	2016	2016-02-25	92459	70.2	41.9	28.3	1.48057	#NULL!		#NULL!	STEMI	2020-10-09	三支	0	0	1	0	1	0	1	53	0	46	0	8.58	0	150	0	0	162	0	1.33	4.67	0	1.76	1	1.33	0	2.54	0	99	1	122	1	516.8	1	1	1
68	王会林	2016	2016-02-28	92709	61.7	35.2	26.5	1.3283	#NULL!		#NULL!	STEMI	2020-10-09	双支，左前降、右冠	0	1	0	0	1	0	1	61	0	62	0	11.21	1	144	0	0	197	0	0.97	3.69	0	0.86	0	0.97	1	2.09	0	#NULL!	#NULL!	64.5	0	377.1	0	0	0
69	张瑞	2016	2016-02-27	92655	69.4	40.1	29.3	1.3686	#NULL!		#NULL!	STEMI	2020-10-09	单支，左回旋	1	0	0	0	1	0	1	59	0	49	0	9.9	1	146	0	0	197	0	1.89	3.42	0	1.6	0	1.89	0	0.8	0	35	1	78.8	0	325.3	0	0	1
70	姜树会	2016	2018-09-03	92258	68.3	43.1	25.2	1.71032	2018-09-03	UA	#NULL!	STEMI	#NULL!	单支，左前降	1	0	0	0	1	0	1	48	0	47	0	12.33	1	141	0	0	171	0	1.3	4.48	0	0.82	0	1.3	0	2.81	0	16	0	67.2	0	171.2	0	0	1
71	田淑敏	2016	2016-02-27	92661	77.6	43.5	34.1	1.27566	2018-06-11	陈旧性下壁心梗	1	STEMI	#NULL!	单支，左回旋	1	0	0	0	1	0	0	42	0	41	0	11.7	1	141	0	0	187	0	1.46	5.16	0	2.32	1	1.46	0	2.73	0	237.75	1	48.32	0	245.9	0	0	0
72	王更礼	2016	2016-03-02	93256	59.9	33.2	26.7	1.24345	2016-03-28	急性下壁、右室壁ST段抬高型心梗恢复期	1	STEMI	#NULL!	双支，左前降、右冠	0	1	0	0	1	0	1	68	1	71	0	13.92	1	133	0	0	277	0	0.46	3.81	0	0.98	0	0.46	1	1.98	0	11	0	91.9	0	254	0	1	0
73	王中堂	2016	2016-03-01	93043	72.3	38.7	33.6	1.15179	2016-03-14	UA	1	STEMI	#NULL!	双支，右冠、左前降	0	1	0	0	1	0	1	59	0	58	0	9.1	0	125	0	1	269	0	1.15	4.47	0	2.99	1	1.15	0	1.96	0	35	1	69.4	0	238.5	0	1	1
76	付立国	2016	2016-03-11	94310	79.8	48.5	31.3	1.54952	#NULL!		#NULL!	STEMI	2020-10-09	双支，左前降、右冠	0	1	0	0	1	0	1	46	0	66	0	11.4	1	172	0	0	197	0	1.22	6.17	1	5.1	1	1.22	0	2.63	0	19	1	88.17	0	488.4	0	1	0
77	班瑞兴	2016	2016-03-12	94353	76.3	44	32.3	1.36223	#NULL!		#NULL!	STEMI	2020-10-09	双支，前降、左回旋	0	1	0	0	1	0	1	56	0	41	0	7.71	0	169	0	0	230	0	1.47	5.09	0	1.52	0	1.47	0	2.93	0	17	1	82.5	0	308.9	0	0	0
85	王中堂	2016	2016-03-01	93043	72.2	38.7	33.5	1.15522	2016-03-14	STEMI，梗死后心绞痛	1	STEMI	#NULL!	双支，右冠、左前降	0	1	0	0	1	0	1	59	0	58	0	9.1	0	125	0	1	269	0	1.15	4.47	0	2.99	1	1.15	0	1.96	0	35	1	69.4	0	238.5	0	1	1
94	陈凤朝	2016	2016-03-28	96329	76.3	41	35.3	1.16147	#NULL!		#NULL!	STEMI	2020-10-09	双支，左前降、右冠	0	1	0	0	1	0	1	57	0	58	0	7.86	0	148	0	0	190	0	1.46	3.24	0	2.56	1	1.46	0	0.62	0	34	1	66.61	0	297.2	0	1	0
102	袁文连	2016	2016-03-29	96468	71.3	39.6	31.7	1.24921	#NULL!		#NULL!	STEMI	2020-10-09	三支	0	0	1	0	1	0	1	60	0	56	0	7.29	0	135	0	0	400	1	1.48	7.2	1	1.21	0	1.48	0	5.17	1	17	1	58.4	0	292.7	0	1	0
106	蔺海军	2016	2016-04-09	97783	79.8	44.9	34.9	1.28653	#NULL!		#NULL!	STEMI	2020-10-09	双支，左回旋、左前降	0	1	0	0	1	0	1	40	0	48	0	23.52	1	164	0	0	357	1	1.05	4.44	0	2.27	1	1.05	0	2.36	0	33	1	79.5	0	301.3	0	1	1
107	张国孝	2016	2016-04-05	97345	73.8	40.4	33.4	1.20958	#NULL!		#NULL!	STEMI	2020-10-09	单支，左前降	1	0	0	0	1	0	1	55	0	62	0	4.5	0	132	0	0	115	0	1.03	4.41	0	3.11	1	1.03	0	1.97	0	13	0	109.2	0	424.4	0	1	1
108	谷印忠	2016	2016-04-12	98237	72.4	43.6	28.8	1.51389	#NULL!		#NULL!	STEMI	2020-10-09	双支，左回旋、左前降	0	1	0	0	1	0	1	43	0	49	0	14.47	1	164	0	0	332	0	0.97	5.74	1	2.89	1	0.97	1	3.46	1	22	1	84.4	0	272.3	0	1	0
110	宋华强	2016	2016-03-31	96797	58.5	33	25.5	1.29412	#NULL!		#NULL!	STEMI	2020-10-09	双支，左前降、右冠	0	1	0	0	1	0	1	64	0	51	0	15.56	1	125	0	1	196	0	0.76	3.23	0	1.34	0	0.76	1	1.86	0	28	1	111.9	1	595.1	1	1	1
111	李志坚	2016	2016-04-05	97295	69.7	36.8	32.9	1.11854	#NULL!		#NULL!	STEMI	2020-10-09	三支	0	0	1	0	1	0	1	46	0	43	0	6.8	0	145	0	0	284	0	0.76	4.18	0	1.88	1	0.76	1	2.57	0	15	0	114	1	353.2	0	1	0
113	候荣臣	2016	2016-04-01	96913	71.3	38.6	32.7	1.18043	#NULL!		#NULL!	STEMI	2020-10-09	三支	0	0	1	0	1	0	1	61	0	44	0	12.77	1	155	0	0	235	0	1.33	5.2	1	1.81	1	1.33	0	3.05	0	#NULL!	#NULL!	73.8	0	254.3	0	1	1
116	杨永宝	2016	2016-04-14	98482	69.9	42.1	27.8	1.51439	2017-11-19	UA	#NULL!	STEMI	#NULL!	单支，左前降	1	0	0	0	1	0	1	50	0	51	0	10.2	1	153	0	0	197	0	1	4.56	0	1.29	0	1	0	2.97	0	13	0	74.1	0	239.9	0	0	0
117	于彦明	2016	2016-04-16	98640	69.6	40.1	29.5	1.35932	#NULL!		#NULL!	STEMI	2020-10-09	单支，左回旋	1	0	0	0	1	0	1	59	0	60	0	5.45	0	163	0	0	170	0	1.11	4.95	0	1.49	0	1.11	0	3.16	0	71	1	79.6	0	393.6	0	0	1
120	徐孝占	2016	2016-04-02	97006	67.5	37.5	30	1.25	#NULL!		#NULL!	STEMI	2020-10-19	单支，右冠	1	0	0	0	1	0	1	58	0	39	1	17.52	1	150	0	0	211	0	0.99	5.02	0	1.87	1	0.99	1	3.18	0	278	1	74.5	0	357.3	0	1	0
121	冷子印	2016	2016-04-23	99483	61.1	35.3	25.8	1.36822	#NULL!		#NULL!	STEMI	2020-10-09	三支	0	0	1	0	1	0	1	71	1	44	0	8.41	0	134	0	0	165	0	0.79	3.38	0	3.46	1	0.79	1	1.02	0	122	1	63.2	0	320.3	0	1	0
122	齐玉藩	2016	2016-04-27	100021	54.7	30	24.7	1.21457	2018-07-30	ACS(UA)	#NULL!	STEMI	#NULL!	三支	0	0	1	0	1	0	1	70	1	42	0	10.22	1	147	0	0	201	0	1.25	3.89	0	0.93	0	1.25	0	2.22	0	291	1	77.1	0	280.5	0	0	1
124	刘树义	2016	2016-04-19	98961	66.9	41	25.9	1.58301	#NULL!		#NULL!	STEMI	2020-10-09	双支，左前降、右冠	0	1	0	0	1	0	1	59	0	59	0	10.32	1	153	0	0	282	0	0.53	4.38	0	1.96	1	0.53	1	2.58	0	#NULL!	#NULL!	84.4	0	364.1	0	1	1
125	王才	2016	2016-04-16	98660	63.6	34.8	28.8	1.20833	#NULL!		#NULL!	STEMI	2020-10-09	单支，左前降	1	0	0	0	1	0	1	60	0	51	0	16.8	1	152	0	0	161	0	1.28	2.9	0	0.62	0	1.28	0	1.34	0	67	1	59.2	0	209	0	0	0
127	张春梅	2016	2016-04-15	98523	83.3	47	36.3	1.29477	#NULL!		#NULL!	STEMI	2020-10-13	左前降	1	0	0	0	1	0	0	49	0	47	0	17.47	1	142	0	0	437	1	1.14	6.59	1	4.64	1	1.14	0	3.9	1	12.96	0	37.75	0	279.2	0	1	1
136	黄宝余	2016	2016-05-03	100645	76.3	41.8	34.5	1.21159	#NULL!		#NULL!	STEMI	2020-10-09	单支，左前降	1	0	0	0	1	0	1	62	0	46	0	11.43	1	158	0	0	255	0	1.14	6.02	1	1.34	0	1.14	0	4.27	1	20	1	80.3	0	397	0	1	0
137	赫志伟	2016	2016-04-20	99233	67.7	42	25.7	1.63424	#NULL!		#NULL!	STEMI	2020-10-09	三支	0	0	1	0	1	0	1	46	0	62	0	13.35	1	164	0	0	326	0	1.57	3.93	0	1.47	0	1.57	0	1.69	0	15	0	61.2	0	303	0	0	1
139	白玉忠	2016	2016-04-20	99222	71.8	38.1	33.7	1.13056	#NULL!		#NULL!	STEMI	2020-10-09	三支	0	0	1	0	1	0	1	61	0	53	0	13.62	1	153	0	0	216	0	0.87	4.52	0	1.55	0	0.87	1	2.95	0	127	1	80.4	0	318.3	0	0	1
140	祁建国	2016	2016-05-11	101603	66.7	36.4	30.3	1.20132	#NULL!		#NULL!	STEMI	2020-10-09	双支，左回旋、右冠	0	1	0	0	1	0	1	63	0	56	0	8.64	0	171	0	0	144	0	1.08	3.67	0	0.71	0	1.08	0	2.27	0	31	1	97.52	0	356.3	0	0	0
141	苏宗利	2016	2016-05-11	101693	81.8	48.7	33.1	1.4713	#NULL!		#NULL!	STEMI	2020-10-09	单支，右冠	1	0	0	0	1	0	1	42	0	65	0	12.91	1	184	0	0	294	0	1.3	4.44	0	3.11	1	1.3	0	1.73	0	13	0	64.8	0	736.3	1	1	0
144	张希学	2016	2016-04-26	99936	60.5	32.1	28.4	1.13028	2017-05-16	陈旧性心梗复查	#NULL!	STEMI	2020-10-09	单支，右冠	1	0	0	0	1	0	1	64	0	42	0	12.25	1	163	0	0	196	0	0.8	3.77	0	0.79	0	0.8	1	2.1	0	299	1	92.2	0	204.6	0	1	1
146	陈彦冰	2016	2016-05-14	101971	77.4	45.3	32.1	1.41121	2016-11-05	UA	#NULL!	STEMI	#NULL!	三支	0	0	1	0	1	0	1	65	0	63	0	10.104	1	167	0	0	228	0	1.3	5.75	1	2.82	1	1.3	0	3.17	0	12	0	83	0	215.5	0	1	1
147	高殿秋	2016	2016-05-15	101989	86.4	45.9	40.5	1.13333	#NULL!		#NULL!	STEMI	2020-10-09	双支，左前降、右冠	0	1	0	0	1	0	0	62	0	55	0	9.27	0	153	0	0	281	0	1.31	6.09	1	2.47	1	1.31	0	3.66	1	7	0	74.5	0	474.4	0	1	1
148	周福苍	2016	2016-05-15	102002	78.1	46.6	31.5	1.47937	#NULL!		#NULL!	STEMI	2020-10-09	双支，左前降、右冠	0	1	0	0	1	0	1	46	0	69	0	8.15	0	144	0	0	345	0	1.52	3.68	0	0.95	0	1.52	0	1.73	0	9	0	72	0	343.2	0	0	1
149	佟佳祥	2016	2016-05-16	102216	75.5	44.6	30.9	1.44337	#NULL!		#NULL!	STEMI	2020-10-09	单支，左前降	1	0	0	0	1	0	1	28	0	65	0	12.22	1	177	0	0	219	0	1.18	3.85	0	0.99	0	1.18	0	2.22	0	#NULL!	#NULL!	58.9	0	364.8	0	0	0
152	石树军	2016	2016-05-18	102440	71.4	42.6	28.8	1.47917	#NULL!		#NULL!	STEMI	2020-10-18	单支，右冠	1	0	0	0	1	0	1	44	0	63	0	10.96	1	184	0	0	170	0	1.01	4.12	0	2.7	1	1.01	0	1.88	0	11	0	74.9	0	303.1	0	1	0
155	窦启贵	2016	2016-05-19	102611	65.1	37.6	27.5	1.36727	#NULL!		#NULL!	STEMI	2020-10-09	三支	0	0	1	0	1	0	1	63	0	64	0	10.45	1	136	0	0	160	0	1.28	3.1	0	0.87	0	1.28	0	1.42	0	41	1	60.6	0	139	0	0	1
156	陈宝成	2016	2016-05-20	102654	78	44.1	33.9	1.30088	#NULL!		#NULL!	STEMI	2020-10-09	三支	0	0	1	0	1	0	1	61	0	57	0	9.5	0	165	0	0	101	0	1.17	2.78	0	1.73	1	1.17	0	0.82	0	27	1	55.3	0	237.7	0	1	1
158	杨磊	2016	2016-05-22	102888	82.9	46.8	36.1	1.2964	#NULL!		#NULL!	STEMI	2020-10-09	单支，左回旋	1	0	0	0	1	0	1	36	0	#NULL!	#NULL!	1.83	0	153	0	0	214	0	1.16	4.55	0	2.5	1	1.16	0	2.25	0	31	1	68.3	0	304.8	0	1	1
165	李秀红	2016	2016-06-13	103615	74.1	41.1	33	1.24545	#NULL!		#NULL!	STEMI	2020-10-14	单支，左前降	1	0	0	0	1	0	0	52	0	44	0	11.13	1	138	0	0	221	0	1.34	3.51	0	2.07	1	1.34	0	1.53	0	12.83	0	55	0	216	0	0	1
166	刘春萍	2016	2016-05-31	104008	73.3	42.3	31	1.36452	2018-01-01	冠状动脉双支病变	#NULL!	STEMI	2020-10-09	单支，右冠	1	0	0	0	1	0	0	59	0	69	0	10.5	1	137	0	0	303	0	#NULL!	#NULL!	0	#NULL!	0	#NULL!	1	#NULL!	0	16	0	62.8	0	262	0	1	1
167	王桂春	2016	2016-06-01	104220	74.7	45.3	29.4	1.54082	#NULL!		#NULL!	STEMI	2020-10-09	双支，左前降、左回旋	0	1	0	0	1	0	1	67	1	#NULL!	#NULL!	13.29	1	149	0	0	178	0	1.35	4.81	0	0.87	0	1.35	0	3.06	0	252	1	64.9	0	275.9	0	0	0
171	吴海珠	2016	2016-06-01	104198	72.1	42.3	29.8	1.41946	2017-01-03	UA	1	STEMI	#NULL!	双支，左前降、右冠	0	1	0	0	1	0	1	64	0	62	0	7	1	136	0	0	210	0	0.94	3.98	0	2.29	1	0.94	1	2	0	5	0	60.5	0	322.3	0	1	0
172	刘银	2016	2016-06-07	104802	66.6	37	29.6	1.25	#NULL!		#NULL!	STEMI	2020-10-09	三支	0	0	1	0	1	0	1	51	0	60	0	7.92	0	135	0	0	163	0	0.8	3.52	0	1.68	0	0.8	1	1.96	0	24	1	71.3	0	241.1	0	1	1
180	刘金平	2016	2016-06-13	105369	73.5	43.8	29.7	1.47475	#NULL!		#NULL!	STEMI	2020-10-10	三支	0	0	1	0	1	0	1	56	0	#NULL!	#NULL!	9.91	1	155	0	0	259	0	1.59	5.28	1	1.74	1	1.59	0	2.9	0	17	1	75.3	0	424.7	0	1	1
184	王韶华	2016	2016-06-14	105487	74	42.4	31.6	1.34177	#NULL!		#NULL!	STEMI	2020-10-10	单支，左前降	1	0	0	0	1	0	1	58	0	#NULL!	#NULL!	8.23	0	152	0	0	26	0	0.86	4.51	0	3.44	1	0.86	1	2.09	0	14	0	69.74	0	389.1	0	1	0
186	刘玉华	2016	2016-06-19	106051	76.6	40.4	36.2	1.11602	2018-07-17	UA	1	STEMI	#NULL!	双支，右冠、左前降	0	1	0	0	1	0	0	37	0	42	0	15.62	1	122	0	1	361	1	1.4	3.93	0	0.76	0	1.4	0	1.95	0	487	1	57.08	0	243.6	0	1	1
192	王贺丰	2016	2016-06-17	105911	62.1	31.4	30.7	1.0228	2017-09-02	上消化道出血 失血性贫血	#NULL!	STEMI	2020-10-10	双支，左回旋、右冠	0	1	0	0	1	0	1	53	0	52	0	5.54	1	117	1	0	218	0	0.64	2.62	0	0.83	0	0.64	1	1.6	0	13	0	61.4	0	319.4	0	1	0
196	徐炳齐	2016	2016-06-18	7225	69.2	41.3	27.9	1.48029	#NULL!		#NULL!	STEMI	2020-10-10	三支	0	0	1	0	1	0	1	63	0	64	0	13.7	1	141	0	0	198	0	1.3	3.72	0	2.4	1	1.3	0	1.33	0	17	1	87.2	0	284.1	0	1	1
198	王士会	2016	2016-07-06	108189	73.4	38.5	34.9	1.10315	#NULL!		#NULL!	STEMI	2020-10-10	单支，左前降	1	0	0	0	1	0	1	63	0	52	0	15.51	1	165	0	0	176	0	1.32	3.99	0	0.71	0	1.32	0	2.35	0	41	1	59.8	0	349.4	0	0	0
200	贺守明	2016	2016-06-28	107271	63.8	36.5	27.3	1.337	#NULL!		#NULL!	STEMI	2020-10-10	双支，左前降、左回旋	0	1	0	0	1	0	1	52	0	60	0	8.72	0	165	0	0	246	0	0.69	5.54	1	1.07	0	0.69	1	3.87	1	#NULL!	#NULL!	73.2	0	399.5	0	1	1
205	孙跃武	2016	2016-06-27	107034	67.6	39.8	27.8	1.43165	#NULL!		#NULL!	STEMI	2020-10-10	三支，左前降支、左回旋支、右冠	0	0	1	0	1	0	1	51	0	58	0	10.4	1	133	0	0	178	0	0.86	3.15	0	1.52	0	0.86	1	1.6	0	14	0	73.4	0	304.3	0	0	0
208	罗薛	2016	2016-07-11	108647	71	40.5	30.5	1.32787	#NULL!		#NULL!	STEMI	2020-10-10	单支，左前降支	1	0	0	0	1	0	1	75	1	46	0	9.2	0	134	0	0	175	0	1.11	5	0	2.03	1	1.11	0	2.97	0	29	1	72.7	0	277.6	0	1	1
209	杨文德	2016	2016-07-12	108805	69.8	38.7	31.1	1.24437	#NULL!		#NULL!	STEMI	2020-10-10	单支，左前降支	1	0	0	0	1	0	1	61	0	61	0	4.85	1	130	0	0	157	0	0.82	3.71	0	1.87	1	0.82	1	2.04	0	3	0	82.8	0	249.5	0	1	0
217	陈立志	2016	2016-07-22	110189	65.9	36.7	29.2	1.25685	#NULL!		#NULL!	STEMI	2020-10-10	双支，右冠、左回旋	0	1	0	0	1	0	1	50	0	51	0	6.3	0	162	0	0	183	0	0.86	3.71	0	2.7	1	0.86	1	1.62	0	5	0	89.1	0	418.9	0	1	0
220	马传廷	2016	2016-07-28	110907	75.8	38.6	37.2	1.03763	#NULL!		#NULL!	STEMI	2020-10-10	双支，左前降、右冠	0	1	0	0	1	0	1	64	0	41	0	11.17	1	145	0	0	221	0	1.31	4.3	0	0.82	0	1.31	0	2.62	0	14	0	70.5	0	393.1	0	0	1
227	邱德华	2016	2016-08-06	111909	68.7	41.7	27	1.54444	#NULL!		#NULL!	STEMI	2020-10-10	双支，左前降、右冠	0	1	0	0	1	0	1	37	0	54	0	12.26	1	148	0	0	182	0	0.96	4.77	0	2.9	1	0.96	1	2.49	0	13	0	67.4	0	413.6	0	1	1
229	刘瑞臣	2016	2016-08-07	112004	80.5	41.8	38.7	1.0801	#NULL!		#NULL!	STEMI	2020-10-10	三支	0	0	1	0	1	0	1	69	1	37	1	8.17	0	140	0	0	162	0	1.12	4.26	0	1.37	0	1.12	0	2.52	0	139	1	61.4	0	389	0	0	0
230	柳建民	2016	2016-08-08	112173	70.6	38.9	31.7	1.22713	#NULL!		#NULL!	STEMI	2020-10-10	双支，左回旋、右冠	0	1	0	0	1	0	1	56	0	54	0	8.7	0	161	0	0	171	0	0.85	4.19	0	5.93	1	0.85	1	0.64	0	5	0	68.5	0	501.8	0	1	1
231	谢天财	2016	2016-08-09	112269	68.8	38.4	30.4	1.26316	#NULL!		#NULL!	STEMI	2020-10-10	三支	0	0	1	0	1	0	1	60	0	59	0	8.62	0	158	0	0	190	0	1.2	5.17	0	3.16	1	1.2	0	2.53	0	81	1	66.6	0	470.9	0	1	1
232	王忠杰	2016	2016-07-27	110713	67.1	37.5	29.6	1.26689	#NULL!		#NULL!	STEMI	2020-10-10	双支，左前降、左回旋	0	1	0	0	1	0	1	61	0	61	0	10.96	1	149	0	0	181	0	0.87	3.19	0	0.81	0	0.87	1	1.95	0	51	1	49	0	243.4	0	0	0
233	张树松	2016	2016-07-30	111079	73	41.9	31.1	1.34727	#NULL!		#NULL!	STEMI	2020-10-10	单支	1	0	0	0	1	0	1	53	0	59	0	7.55	0	159	0	0	154	0	0.9	4.45	0	2.45	1	0.9	1	2.44	0	48	1	78	0	365	0	1	0
236	黄宝国	2016	2016-08-14	112809	63.5	38	25.5	1.4902	#NULL!		#NULL!	STEMI	2020-10-10	单支，左回旋	1	0	0	0	1	0	1	50	0	61	0	12.81	1	187	0	0	188	0	1.58	4.33	0	1.42	0	1.58	0	2.1	0	287	1	85.8	0	546.8	1	0	0
242	孙长青	2016	2016-08-23	113976	64.6	36.7	27.9	1.31541	#NULL!		#NULL!	STEMI	2020-10-10	三支	0	0	1	0	1	0	1	43	0	68	0	7.94	0	142	0	0	198	0	0.96	4.81	0	2.13	1	0.96	1	2.88	0	8	0	64.6	0	405.8	0	1	0
244	蒋维明	2016	2016-08-15	112957	76.6	44.2	32.4	1.3642	#NULL!		#NULL!	STEMI	2020-10-10	双支，左前降、右冠	0	1	0	0	1	0	1	61	0	57	0	10.31	1	152	0	0	192	0	1.32	3.74	0	1.08	0	1.32	0	1.93	0	11	0	63.3	0	454.8	0	0	0
245	孙庆祥	2016	2016-08-18	113399	73.8	40.2	33.6	1.19643	#NULL!		#NULL!	STEMI	2020-10-10	单支，左前降支	1	0	0	0	1	0	1	63	0	60	0	6.27	0	171	0	0	190	0	0.86	2.93	0	1.41	0	0.86	1	1.43	0	5	0	65.4	0	345.6	0	0	1
246	杨国武	2016	2016-08-02	111472	65	36	29	1.24138	#NULL!		#NULL!	STEMI	2020-10-10	双支，左前降、右冠	0	1	0	0	1	0	1	57	0	44	0	12.91	1	146	0	0	138	0	0.97	3.4	0	1.23	0	0.97	1	1.87	0	490	1	56.6	0	337.8	0	0	1
252	李栋	2016	2016-08-06	111929	66.9	39.9	27	1.47778	#NULL!		#NULL!	STEMI	2020-10-10	单支，左前降支	1	0	0	0	1	0	1	37	0	43	0	15.89	1	140	0	0	276	0	0.97	5.37	1	2.81	1	0.97	1	3.12	0	#NULL!	#NULL!	55.4	0	348.1	0	1	0
253	尹宝玉	2016	2016-08-10	112468	70	35.3	34.7	1.01729	2019-05-09	UA	#NULL!	STEMI	#NULL!	单支，左前降支	1	0	0	0	1	0	1	56	0	59	0	10.69	1	153	0	0	123	0	1.08	4.16	0	1.8	1	1.08	0	2.13	0	#NULL!	#NULL!	66.6	0	383.1	0	1	1
258	欧阳永山	2016	2016-09-01	114957	75.1	42.7	32.4	1.3179	#NULL!		#NULL!	STEMI	2020-10-10	双支，左前降、右冠	0	1	0	0	1	0	1	73	1	41	0	8.7	0	137	0	0	145	0	1	4.82	0	2.07	1	1	0	2.88	0	3	0	67.5	0	397.6	0	1	1
264	唐桂珍	2016	2016-09-22	116051	57.3	35.6	21.7	1.64055	2018-03-23	冠心病 心律失常 室性期前收缩 PCI术后	#NULL!	STEMI	2020-10-10	双支，左前降、左回旋	0	1	0	0	1	0	0	77	1	55	0	8.13	0	135	0	0	247	0	1.33	6.01	1	1.44	0	1.33	0	4.03	1	25	1	54.4	0	346.7	0	0	1
266	张凤清	2016	2016-09-14	116339	66.6	40.4	26.2	1.54198	#NULL!		#NULL!	STEMI	2020-10-10	双支，左回旋、右冠	0	1	0	0	1	0	1	65	0	54	0	19.61	1	136	0	0	224	0	1.06	3.39	0	1.5	0	1.06	0	1.65	0	3	0	77.4	0	367.5	0	0	0
267	王淑华	2016	2016-09-14	116332	69.9	40.2	29.7	1.35354	#NULL!		#NULL!	STEMI	2020-10-14	双支，左前降、左回旋	0	1	0	0	1	0	0	65	0	47	0	10.67	1	133	0	0	265	0	0.83	4.11	0	1.18	0	0.83	1	2.51	0	17.24	1	64.18	0	411.2	0	0	1
268	陈瑞莲	2016	2016-09-20	117050	83.4	45.1	38.3	1.17755	2016-08-23	陈旧下壁心梗	1	STEMI	#NULL!	双支，右冠、中间支	0	1	0	0	1	0	0	52	0	57	0	11.83	1	148	0	0	296	0	0.95	3.5	0	0.72	0	0.95	1	2.22	0	20	1	43.5	0	218.9	0	1	1
269	刘淑芳	2016	2016-09-04	88859	65.5	37.4	28.1	1.33096	#NULL!		#NULL!	STEMI	2020-10-10	三支	0	0	1	0	1	0	0	77	1	64	0	12.31	1	132	0	0	196	0	1.36	3.48	0	3.09	1	1.36	0	0.72	0	12	0	59.4	0	289.6	0	1	1
273	范淑华	2016	2016-09-08	102283	70.9	38	32.9	1.15502	#NULL!		#NULL!	STEMI	2020-10-14	单支，左前降	1	0	0	0	1	0	0	75	1	54	0	7.24	0	130	0	0	194	0	1.47	5.74	1	1.36	0	1.47	0	3.28	0	121.22	1	62.81	0	278.8	0	1	1
280	唐桂珍	2016	2016-09-11	116051	78.8	45	33.8	1.33136	#NULL!		#NULL!	STEMI	2020-10-10	双支，左前降、左回旋	0	1	0	0	1	0	0	77	1	55	0	8.13	0	135	0	0	247	0	1.08	6.17	1	1.24	0	1.08	0	3.99	1	#NULL!	#NULL!	51	0	279.8	0	0	1
282	田继续	2016	2016-09-28	117917	66.7	40.9	25.8	1.58527	#NULL!		#NULL!	STEMI	2020-10-10	三支	0	0	1	0	1	0	1	46	0	#NULL!	#NULL!	5.45	0	147	0	0	263	0	0.68	4.07	0	0.98	0	0.68	1	2.39	0	#NULL!	#NULL!	73.86	0	330.2	0	1	0
283	张联庆	2016	2016-09-18	85440	67.7	37.7	30	1.25667	#NULL!		#NULL!	STEMI	2020-10-10	双支，左回旋、右冠	0	1	0	0	1	0	1	46	0	47	0	17	1	191	0	0	193	0	0.95	5.22	1	2.71	1	0.95	1	3.04	0	34	1	58.1	0	511.9	1	1	1
284	赵小虎	2016	2016-10-03	118252	76.6	45.9	30.7	1.49511	#NULL!		#NULL!	STEMI	2020-10-19	三支	0	0	1	0	1	0	1	32	0	68	0	17.54	1	171	0	0	222	0	1.12	7.69	1	3.63	1	1.12	0	4.92	1	101	1	71.66	0	352.8	0	1	0
285	刘智勤	2016	2015-02-23	53774	64.2	32.1	32.1	1	#NULL!		#NULL!	STEMI	2020-10-14	三支	0	0	1	0	1	0	0	73	1	47	0	8.34	0	116	0	1	195	0	1.31	4.26	0	1.7	1	1.31	0	2.19	0	15.12	0	56.13	0	255.9	0	0	0
286	王瑞民	2016	2016-10-04	118341	72.9	42.8	30.1	1.42193	#NULL!		#NULL!	STEMI	2020-10-10	单支，左前降支	1	0	0	0	1	0	1	51	0	66	0	12.45	1	145	0	0	229	0	1.24	3.68	0	1.81	1	1.24	0	1.62	0	34	1	69	0	210.9	0	1	0
287	王建安	2016	2016-10-04	118311	68.2	42.1	26.1	1.61303	#NULL!		#NULL!	STEMI	2020-10-10	双支，左前降、右冠	0	1	0	0	1	0	1	34	0	59	0	7.85	0	156	0	0	200	0	0.73	3.17	0	5.36	1	0.73	1	0	0	43	1	66.5	0	298.8	0	1	1
289	王强	2016	2016-10-09	118750	63.4	37.5	25.9	1.44788	#NULL!		#NULL!	STEMI	2020-10-10	双支，左回旋、右冠	0	1	0	0	1	0	1	52	0	41	0	12	1	154	0	0	142	0	1.14	6.35	1	2.79	1	1.14	0	3.94	1	15	0	79.5	0	390.1	0	1	0
290	冯国芹	2016	2016-10-10	118998	67.4	37	30.4	1.21711	#NULL!		#NULL!	STEMI	2020-10-15	单支，右冠	1	0	0	0	1	0	0	60	0	#NULL!	#NULL!	12.96	1	141	0	0	28	0	1.17	4.47	0	1.58	0	1.17	0	2.48	0	39.51	1	58	0	306	0	1	0
291	张福臣	2016	2016-10-11	119213	72	41.3	30.7	1.34528	#NULL!		#NULL!	STEMI	2020-10-10	单支，右冠	1	0	0	0	1	0	1	58	0	33	1	4.85	0	150	0	0	215	0	0.91	6.39	1	5.38	1	0.91	1	3.03	0	10	0	78.2	0	335.4	0	1	0
295	朱炳昊	2016	2016-10-13	119435	78.9	44.2	34.7	1.27378	#NULL!		#NULL!	STEMI	2020-10-10	双支，左前降、右冠	0	1	0	0	1	0	1	52	0	56	0	9.4	0	181	0	0	190	0	0.98	4.71	0	1.73	1	0.98	1	2.94	0	51	1	66.3	0	342.6	0	1	1
296	张学	2016	2016-10-15	119608	65.9	35.6	30.3	1.17492	#NULL!		#NULL!	STEMI	2020-10-10	双支，左前降、左回旋	0	1	0	0	1	0	1	70	1	61	0	10.84	1	147	0	0	186	0	0.74	4.21	0	1.71	1	0.74	1	2.69	0	10	0	64.3	0	404.9	0	1	1
299	张连春	2016	2016-10-11	119162	86.1	45.7	40.4	1.13119	2019-03-20	UA	#NULL!	STEMI	#NULL!	双支，左回旋、右冠	0	1	0	0	1	0	0	60	0	61	0	7.66	1	153	0	0	306	0	0.8	3.32	0	2.17	1	0.8	1	1.53	0	6	0	70.1	0	364.3	0	1	1
300	王成武	2016	2016-10-08	118741	59.8	34	25.8	1.31783	#NULL!		#NULL!	STEMI	2020-10-10	三支	0	0	1	0	1	0	1	82	1	43	0	6	1	122	0	1	174	0	0.94	2.49	0	0.53	0	0.94	1	1.31	0	36	1	60	0	317.6	0	0	1
303	张国刚	2016	2016-10-14	119467	72.1	42.6	29.5	1.44407	#NULL!		#NULL!	STEMI	2020-10-10	三支	0	0	1	0	1	0	1	61	0	68	0	4.9	0	151	0	0	124	0	0.8	2.75	0	1.54	0	0.8	1	1.25	0	7	0	84.8	0	377	0	1	1
304	王桂喜	2016	2016-10-21	120282	59.4	35.3	24.1	1.46473	#NULL!		#NULL!	STEMI	2020-10-10	单支，右冠	1	0	0	0	1	0	1	51	0	71	0	11.46	1	149	0	0	229	0	1.09	4.38	0	1.83	1	1.09	0	2.46	0	7	0	89.9	0	431.7	0	1	0
306	史玉成	2016	2016-10-26	121029	61.9	32.4	29.5	1.09831	#NULL!		#NULL!	STEMI	2020-10-10	单支，左前降支	1	0	0	0	1	0	1	56	0	47	0	9.83	1	158	0	0	219	0	1.02	6.19	1	1.86	1	1.02	0	4.32	1	3	0	85.6	0	293.6	0	1	0
307	赵信	2016	2016-10-26	121007	63.4	34.1	29.3	1.16382	#NULL!		#NULL!	STEMI	2020-10-10	双支，左回旋、右冠	0	1	0	0	1	0	1	69	1	63	0	6.55	0	145	0	0	238	0	0.84	3.77	0	1.32	0	0.84	1	2.33	0	26	1	55.9	0	208.5	0	0	1
308	刘建军	2016	2016-10-26	120930	71.8	39.9	31.9	1.25078	#NULL!		#NULL!	STEMI	2020-10-10	单支，左前降支	1	0	0	0	1	0	1	48	0	58	0	9.71	1	167	0	0	183	0	0.74	3.58	0	5.98	1	0.74	1	0.12	0	7	0	99.8	0	332.4	0	1	1
310	路军	2016	2016-10-30	121396	67.5	41.1	26.4	1.55682	#NULL!		#NULL!	STEMI	2020-10-10	三支	0	0	1	0	1	0	1	67	1	63	0	7.76	0	158	0	0	245	0	1.14	5.95	1	5.93	1	1.14	0	2.11	0	22	1	74.1	0	313.2	0	1	0
315	李世亮	2016	2016-11-03	121949	73.6	39.5	34.1	1.15836	#NULL!		#NULL!	STEMI	2020-10-10	单支，左前降支	1	0	0	0	1	0	1	59	0	76	0	7.26	0	166	0	0	237	0	1.24	5.66	1	1.28	0	1.24	0	3.84	1	15	0	54	0	353.5	0	1	1
316	姜柏顺	2016	2016-11-04	122021	75.2	39.9	35.3	1.13031	#NULL!		#NULL!	STEMI	2020-10-10	单支，左前降支	1	0	0	0	1	0	1	56	0	46	0	7.96	0	146	0	0	225	0	1	3.89	0	1.58	0	1	0	2.17	0	13	0	66.2	0	273	0	0	1
317	李子明	2016	2016-11-05	122209	69.6	41.3	28.3	1.45936	#NULL!		#NULL!	STEMI	2020-10-10	单支，右冠	1	0	0	0	1	0	1	28	0	53	0	26.77	1	153	0	0	286	0	0.67	4.77	0	4.19	1	0.67	1	2.2	0	5	0	75.7	0	397.4	0	1	0
318	张保国	2016	2016-11-05	122213	74.7	44.3	30.4	1.45724	2016-12-17	陈旧性前壁心梗	#NULL!	STEMI	#NULL!	三支	0	0	1	0	1	0	1	45	0	45	0	14.1	1	159	0	0	255	0	0.94	5.55	1	3.41	1	0.94	1	3.06	0	13	0	61	0	360.4	0	1	0
319	王爱香	2016	2016-11-05	122191	60.9	32.2	28.7	1.12195	#NULL!		#NULL!	STEMI	2020-10-10	三支	0	0	1	0	1	0	0	60	0	80	0	8.5	0	140	0	0	249	0	1.3	5.24	1	1.99	1	1.3	0	3.04	0	9	0	59	0	364.5	0	1	1
325	李昆玉	2016	2016-11-10	122871	81.3	40.1	41.2	0.973301	#NULL!		#NULL!	STEMI	2020-10-10	双支，左前降、右冠	0	1	0	0	1	0	1	80	1	43	0	11.81	1	143	0	0	192	0	0.7	5.69	1	5.93	1	0.7	1	2.29	0	164	1	126.9	1	451	0	1	1
326	张井凡	2016	2016-11-11	123058	76.7	45.1	31.6	1.42722	#NULL!		#NULL!	STEMI	2020-10-10	单支，右冠	1	0	0	0	1	0	1	50	0	56	0	9.9	1	159	0	0	196	0	1.38	4.84	0	4.72	1	1.38	0	1.31	0	14	0	68.3	0	299.7	0	1	1
327	孙继德	2016	2016-11-14	123441	70.5	39.8	30.7	1.29642	#NULL!		#NULL!	STEMI	2020-10-10	单支，右冠	1	0	0	0	1	0	1	56	0	47	0	6.99	0	148	0	0	167	0	0.92	4.1	0	2.34	1	0.92	1	2.12	0	6	0	72.5	0	393.2	0	1	1
328	王会芝	2016	2016-11-16	123588	68.8	34.1	34.7	0.982709	#NULL!		#NULL!	STEMI	2020-10-10	双支，左前降、右冠	0	1	0	0	1	0	0	60	0	63	0	7.47	0	140	0	0	279	0	0.94	2.82	0	3.34	1	0.94	1	0.36	0	8	0	66.2	0	303.6	0	0	0
330	刘金学	2016	2016-11-07	122372	60.6	36.9	23.7	1.55696	#NULL!		#NULL!	STEMI	2020-10-10	单支，左前降支	1	0	0	0	1	0	1	41	0	46	0	19.11	1	147	0	0	231	0	1.3	2.99	0	0.48	0	1.3	0	1.47	0	300	1	56.1	0	246.2	0	0	0
333	李占利	2016	2016-11-07	122473	63.6	34.6	29	1.1931	#NULL!		#NULL!	STEMI	#NULL!	单支，右冠	1	0	0	0	1	0	1	54	0	48	0	7.82	0	148	0	0	224	0	0.66	4.06	0	5.54	1	0.66	1	0.88	0	12	0	59.3	0	281.3	0	1	1
334	李国	2016	2016-11-23	124402	76.4	42.2	34.2	1.23392	#NULL!		#NULL!	STEMI	2020-10-11	双支，左前降、右冠	0	1	0	0	1	0	1	38	0	65	0	9.74	1	177	0	0	205	0	1.05	3.65	0	3.66	1	1.05	0	0.94	0	389	1	56.5	0	539.8	1	1	1
338	朱柏光	2016	2016-11-09	122830	66.4	34.4	32	1.075	#NULL!		#NULL!	STEMI	2020-10-11	三支	0	0	1	0	1	0	1	63	0	51	0	10.25	1	157	0	0	167	0	1.13	3.18	0	1.16	0	1.13	0	1.52	0	14	0	67.7	0	189.4	0	0	0
339	陈克寅	2016	2016-11-25	124651	66.7	36.3	30.4	1.19408	#NULL!		#NULL!	STEMI	2020-10-11	三支	0	0	1	0	1	0	1	71	1	56	0	6.57	0	145	0	0	231	0	0.75	4.26	0	2.23	1	0.75	1	2.5	0	9	0	71	0	325.8	0	1	1
340	高猛	2016	2016-11-27	124769	75.7	44.1	31.6	1.39557	#NULL!		#NULL!	STEMI	2020-10-11	单支，左前降支	1	0	0	0	1	0	1	22	0	55	0	17.6	1	154	0	0	325	0	1.73	5.52	1	3.58	1	1.73	0	2.16	0	140	1	61.5	0	470.9	0	1	0
342	娄桂枝	2016	2018-06-03	122912	78	39.4	38.6	1.02073	#NULL!		#NULL!	STEMI	2020-10-14	双支，左前降、左回旋	0	1	0	0	1	0	0	60	0	43	0	8.7	0	118	0	1	182	0	0.97	5.25	1	2.03	1	0.97	1	3.27	0	16.2	1	70.83	0	301	0	0	1
343	王俊鹏	2016	2016-12-04	125698	68.4	40.1	28.3	1.41696	#NULL!		#NULL!	STEMI	2020-10-11	三支	0	0	1	0	1	0	1	53	0	63	0	16.63	1	155	0	0	227	0	1.54	4.08	0	1.52	0	1.54	0	1.85	0	24	1	97.13	0	390.5	0	0	0
344	马义忠	2016	2016-12-07	126144	69	37.7	31.3	1.20447	#NULL!		#NULL!	STEMI	2020-10-11	单支，左前降支	1	0	0	0	1	0	1	61	0	54	0	10.42	1	148	0	0	179	0	1.29	4.08	0	1.95	1	1.29	0	1.9	0	147	1	65.8	0	274.8	0	1	0
345	张殿印	2016	2016-12-07	126281	75.1	43.7	31.4	1.39172	2018-05-21	UA	#NULL!	STEMI	#NULL!	三支	0	0	1	0	1	0	1	61	0	43	0	8.66	0	165	0	0	266	0	0.97	4.92	0	5.93	1	0.97	1	1.25	0	4	0	71.5	0	379	0	1	1
350	魏艳华	2016	2016-11-27	124824	71.3	39.3	32	1.22812	#NULL!		#NULL!	STEMI	2020-10-11	双支，左前降、右冠	0	1	0	0	1	0	1	54	0	66	0	11.93	1	151	0	0	207	0	1.17	4.84	0	2.16	1	1.17	0	2.69	0	7	0	59.3	0	248.5	0	1	0
351	李翠珍	2016	2018-06-07	126710	76.9	41.6	35.3	1.17847	#NULL!		#NULL!	STEMI	2020-10-14	三支	0	0	1	0	1	0	0	58	0	46	0	15.57	1	143	0	0	184	0	1.07	4.64	0	2.33	1	1.07	0	2.62	0	18.42	1	61	0	172	0	1	1
356	任献斌	2016	2016-12-01	125505	65.1	36	29.1	1.23711	#NULL!		#NULL!	STEMI	2020-10-11	双支，左前降、右冠	0	1	0	0	1	0	1	58	0	52	0	7.71	0	151	0	0	190	0	0.95	4.33	0	1.12	0	0.95	1	2.87	0	9	0	61.3	0	455.8	0	0	1
370	杨明	2016	2016-12-20	127854	69.3	40.6	28.7	1.41463	#NULL!		#NULL!	STEMI	2020-10-11	单支，右冠	1	0	0	0	1	0	1	66	1	58	0	15.41	1	155	0	0	216	0	1.66	3.78	0	0.53	0	1.66	0	1.88	0	36	1	42.1	0	224	0	0	1
373	罗振堂	2016	2016-12-24	128316	70.1	40.8	29.3	1.39249	#NULL!		#NULL!	STEMI	2020-10-11	单支，左前降支	1	0	0	0	1	0	1	39	0	#NULL!	#NULL!	15.9	1	164	0	0	288	0	1	7.07	1	2.39	1	1	0	4.98	1	20	1	57.2	0	461.1	0	1	0
382	李翠平	2017	2017-10-11	166010	73.7	41.7	32	1.30313	#NULL!		#NULL!	STEMI	2020-10-14	双支，左前降、右冠	0	1	0	0	1	0	0	66	1	42	0	14.14	1	128	0	1	372	1	1.09	7.29	1	5.77	1	1.09	0	4.38	1	33.62	1	48.73	0	266.9	0	1	1
388	朱树成	2017	2016-12-26	128586	61.4	35.5	25.9	1.37066	#NULL!		#NULL!	STEMI	2020-10-11	三支	0	0	1	0	1	0	1	51	0	50	0	9.44	0	134	0	0	156	0	0.82	4.08	0	1.48	0	0.82	1	2.59	0	89	1	93.3	0	275	0	0	1
393	吴海珠	2017	2016-06-01	104198	72.1	42.3	29.8	1.41946	2017-01-03	UA	1	STEMI	#NULL!	双支，左前降、右冠	0	1	0	0	1	0	1	64	0	57	0	7	0	136	0	0	210	0	0.94	3.98	0	2.29	1	0.94	1	2	0	5	0	60.5	0	323.3	0	1	0
395	石鹏林	2017	2016-12-30	129090	59.6	34.6	25	1.384	2017-05-24	陈旧性下壁、右室壁、正后壁心肌梗死	1	STEMI	#NULL!	双支，左前降、右冠	0	1	0	0	1	0	1	67	1	51	0	6.43	0	133	0	0	146	0	1.07	3.68	0	1.04	0	1.07	0	2.21	0	#NULL!	#NULL!	74.8	0	535.3	1	0	1
398	郭福	2017	2017-01-07	129971	68.4	42.5	25.9	1.64093	2018-09-07	陈旧性心梗	#NULL!	STEMI	#NULL!	单支，左前降	1	0	0	0	1	0	1	53	0	53	0	7.92	0	181	0	0	192	0	1.35	5.22	1	2.94	1	1.35	0	2.53	0	8	0	90.2	0	413.5	0	1	0
399	马文兵	2017	2017-01-08	130009	61.5	35.6	25.9	1.37452	2018-10-16	陈旧性心梗	#NULL!	STEMI	#NULL!	双支，左前降、右冠	0	1	0	0	1	0	1	52	0	66	0	6.86	0	182	0	0	137	0	1.26	3.8	0	2.3	1	1.26	0	1.49	0	14	0	72.4	0	246.3	0	1	0
401	吕凤祥	2017	2017-01-12	130710	67.8	42.3	25.5	1.65882	#NULL!		#NULL!	STEMI	2020-10-11	三支	0	0	1	0	1	0	1	45	0	#NULL!	#NULL!	11.37	1	151	0	0	23	0	0.93	4.76	0	2.62	1	0.93	1	2.64	0	19	1	59.2	0	369.9	0	1	0
406	张志忠	2017	2016-12-30	129029	78	47.7	30.3	1.57426	#NULL!		#NULL!	STEMI	2020-10-11	单支，左前降	1	0	0	0	1	0	1	61	0	48	0	11.85	1	172	0	0	280	0	1.26	5.4	1	1.38	0	1.26	0	3.51	1	154	1	69.2	0	226.2	0	1	1
408	朱文和	2017	2016-12-28	128875	54.4	30	24.4	1.22951	#NULL!		#NULL!	STEMI	2020-10-11	双支，左前降、右冠	0	1	0	0	1	0	1	62	0	45	0	8.35	0	141	0	0	145	0	0.72	3.05	0	2	1	0.72	1	1.42	0	274	1	96.22	0	217	0	1	1
411	王继刚	2017	2017-01-15	130908	71.1	40.8	30.3	1.34653	#NULL!		#NULL!	STEMI	2020-10-11	单支，右冠	1	0	0	0	1	0	1	30	0	#NULL!	#NULL!	5.94	0	166	0	0	217	0	0.66	5.9	1	1.69	0	0.66	1	4.47	1	10	0	65.1	0	320.8	0	1	0
413	陈汉林	2017	2017-01-10	130327	64.3	39.6	24.7	1.60324	2017-07-17	UA	#NULL!	STEMI	#NULL!	单支，左前降	1	0	0	0	1	0	1	60	0	64	0	7.11	0	172	0	0	182	0	1.08	4.06	0	2.47	1	1.08	0	1.86	0	7	0	88.66	0	562.6	1	1	1
414	刘占发	2017	2017-01-16	130993	71.3	43.3	28	1.54643	2017-06-20	UA	#NULL!	STEMI	#NULL!	双支，左前降、左回旋	0	1	0	0	1	0	1	70	1	44	0	3.9	0	149	0	0	128	0	1.35	4.25	0	1.7	1	1.35	0	2.13	0	11	0	65.5	0	253.5	0	0	0
416	孙宪友	2017	2017-01-05	129773	60.5	37.8	22.7	1.6652	#NULL!		#NULL!	STEMI	2020-10-11	三支	0	0	1	0	1	0	1	63	0	56	0	6.51	0	152	0	0	200	0	0.86	3.6	0	1.41	0	0.86	1	2.48	0	#NULL!	#NULL!	71.5	0	385.1	0	0	1
417	李立学	2017	2017-01-09	87842	64.2	34.8	29.4	1.18367	#NULL!		#NULL!	STEMI	2020-10-11	三支	0	0	1	0	1	0	1	60	0	71	0	14.57	1	139	0	0	221	0	0.75	3.43	0	1.38	0	0.75	1	2.05	0	26	1	99	0	387.4	0	1	0
419	姜斌	2017	2017-01-18	127408	68.4	42.8	25.6	1.67188	#NULL!		#NULL!	STEMI	2020-10-11	双支，左前降、左回旋	0	1	0	0	1	0	1	48	0	59	0	12.6	1	165	0	0	265	0	0.98	4.35	0	3.47	1	0.98	1	1.79	0	7	0	60.4	0	297.6	0	1	1
420	李士军	2017	2017-01-19	131429	76.5	46.4	30.1	1.54153	#NULL!		#NULL!	STEMI	2020-10-11	三支	0	0	1	0	1	0	1	51	0	49	0	8.77	0	150	0	0	234	0	1.08	4.02	0	1.27	0	1.08	0	2.36	0	12	0	55.2	0	257.3	0	0	0
426	靳井功	2017	2017-01-28	131917	76.4	45.8	30.6	1.49673	#NULL!		#NULL!	STEMI	2020-10-11	单支，左前降	1	0	0	0	1	0	1	65	0	44	0	9.63	1	163	0	0	203	0	1.3	5.46	1	3.66	1	1.3	0	2.5	0	24	1	77.2	0	385.5	0	1	0
427	董海明	2017	2017-01-30	132002	79.6	43.5	36.1	1.20499	#NULL!		#NULL!	STEMI	2020-10-11	单支，右冠	1	0	0	0	1	0	1	44	0	53	0	16.11	1	170	0	0	285	0	1.2	6.25	1	1.33	0	1.2	0	4.45	1	33	1	62.7	0	340.1	0	1	1
429	王晓华	2017	2017-02-02	128452	72.7	40.9	31.8	1.28616	#NULL!		#NULL!	STEMI	2020-10-10	单支，左前降	1	0	0	0	1	0	0	60	0	70	0	6.6	0	134	0	0	224	0	1.22	7	1	3.41	1	1.22	0	4.23	1	#NULL!	#NULL!	59	0	192	0	0	1
430	迟文国	2017	2017-02-09	133511	69.9	40.3	29.6	1.36149	#NULL!		#NULL!	STEMI	2020-10-11	三支	0	0	1	0	1	0	1	66	1	58	0	6.98	0	139	0	0	178	0	1.42	3.53	0	1.82	1	1.42	0	1.28	0	15	0	61	0	283	0	1	0
431	孙东明	2017	2017-02-09	133565	62.9	31.9	31	1.02903	#NULL!		#NULL!	STEMI	2020-10-11	双支，左前降、左回旋	0	1	0	0	1	0	1	78	1	50	0	14	1	157	0	0	272	0	1.16	3.89	0	0.68	0	1.16	0	2.42	0	1042	1	78.9	0	359.6	0	0	1
434	倪海军	2017	2015-04-12	60043	65.3	38.5	26.8	1.43657	2017-02-06	陈旧性下壁、前壁心梗	1	STEMI	#NULL!	三支	0	0	1	0	1	0	1	59	0	51	0	6.28	0	141	0	0	219	0	0.49	3.94	0	1.65	0	0.49	1	2.21	0	#NULL!	#NULL!	79.4	0	444	0	1	1
435	冷子奇	2017	2017-02-03	132318	70.5	40	30.5	1.31148	#NULL!		#NULL!	陈旧性下壁心梗	2020-10-11	双支，左前降、右冠	0	1	0	0	1	0	1	74	1	42	0	5.48	0	152	0	0	208	0	0.91	3.88	0	0.83	0	0.91	1	2.16	0	#NULL!	#NULL!	84.22	0	375.9	0	0	1
440	刘金荣	2017	2017-02-10	133593	70.3	36.6	33.7	1.08605	#NULL!		#NULL!	STEMI	2020-10-10	单支，右冠	1	0	0	0	1	0	0	64	0	62	0	10.89	1	130	0	0	179	0	1.15	4.66	0	3.26	1	1.15	0	2.03	0	300	1	43.8	0	220.3	0	0	1
441	苗旺	2017	2017-01-30	131974	68.9	39.8	29.1	1.3677	#NULL!		#NULL!	STEMI	2020-10-11	双支，左前降、左回旋	0	1	0	0	1	0	1	45	0	44	0	11.35	1	144	0	0	185	0	0.99	4.31	0	2.17	1	0.99	1	2.33	0	141	1	55.8	0	365.9	0	1	0
445	宋振国	2017	2017-02-14	134201	74.5	42.8	31.7	1.35016	#NULL!		#NULL!	STEMI	2020-10-11	双支，左前降、右冠	0	1	0	0	1	0	1	55	0	43	0	5.1	0	162	0	0	130	0	1.11	4.7	0	1.42	0	1.11	0	2.94	0	10	0	65.7	0	375.6	0	0	0
446	张新顺	2017	2017-02-16	134543	76.5	43.6	32.9	1.32523	2018-03-12	UA	#NULL!	STEMI	#NULL!	单支，右冠	1	0	0	0	1	0	1	73	1	#NULL!	#NULL!	9.61	1	126	0	1	237	0	1.53	5.31	1	0.74	0	1.53	0	3.44	1	341	1	123.8	1	398.9	0	1	1
448	彭良顺	2017	2017-01-26	131815	69.9	40.9	29	1.41034	#NULL!		#NULL!	STEMI	2020-10-11	单支，左回旋	1	0	0	0	1	0	1	42	0	48	0	8.16	0	151	0	0	215	0	1.43	4.83	0	1.02	0	1.43	0	2.94	0	11	0	69	0	290.4	0	0	0
451	秦桂才	2017	2017-02-18	134826	73.3	43.1	30.2	1.42715	#NULL!		#NULL!	STEMI	2020-10-11	三支	0	0	1	0	1	0	1	58	0	62	0	7.82	0	152	0	0	167	0	#NULL!	#NULL!	0	#NULL!	0	#NULL!	1	#NULL!	0	14	0	61.5	0	301.4	0	0	0
453	刘东明	2017	2017-02-20	135034	74.6	38.6	36	1.07222	#NULL!		#NULL!	STEMI	2020-10-11	双支，左前降、右冠	0	1	0	0	1	0	1	37	0	41	0	15.7	1	165	0	0	194	0	1.29	6.15	1	2.08	1	1.29	0	3.91	1	103	1	49.6	0	337.8	0	1	0
456	于清如	2017	2017-02-21	135249	65.4	35.5	29.9	1.18729	2018-01-02	UA	#NULL!	STEMI	#NULL!	三支	0	0	1	0	1	0	1	76	1	72	0	5.49	0	162	0	0	148	0	1.4	3.6	0	0.88	0	1.4	0	1.8	0	7	0	59.9	0	244.3	0	0	0
463	郭宝伟	2017	2017-02-13	134068	65.6	36.7	28.9	1.2699	#NULL!		#NULL!	STEMI	2020-10-11	三支	0	0	1	0	1	0	1	48	0	42	0	13.64	1	159	0	0	194	0	0.74	3.53	0	1.13	0	0.74	1	2.28	0	260	1	67.5	0	90.4	0	1	1
466	孙立新	2017	2017-02-28	136197	80.5	47.3	33.2	1.4247	2017-06-01	陈旧性心梗	1	STEMI	#NULL!	三支	0	0	1	0	1	0	1	35	0	#NULL!	#NULL!	6.97	0	156	0	0	256	0	1.14	7.79	1	3.16	1	1.14	0	5.21	1	12	0	64.73	0	302.5	0	1	1
474	方继成	2017	2017-02-21	135277	68.1	36.7	31.4	1.16879	#NULL!		#NULL!	STEMI	2020-10-11	双支，左前降、左回旋	0	1	0	0	1	0	1	55	0	58	0	10.35	1	142	0	0	221	0	#NULL!	#NULL!	0	#NULL!	0	#NULL!	1	#NULL!	0	138	1	62.61	0	360.6	0	0	1
476	赵俊银	2017	2017-02-16	134607	67.7	36.1	31.6	1.14241	#NULL!		#NULL!	STEMI	2020-10-10	三支	0	0	1	0	1	0	0	69	1	65	0	9.53	1	131	0	0	179	0	0.98	6.5	1	5.93	1	0.98	1	2.82	0	11	0	61.8	0	305.6	0	1	1
478	王桂英	2017	2017-03-04	136671	71.8	39.2	32.6	1.20245	#NULL!		#NULL!	STEMI	2020-10-10	单支，右冠	1	0	0	0	1	0	0	62	0	57	0	11.61	1	155	0	0	242	0	0.88	3.8	0	1.37	0	0.88	1	2.3	0	#NULL!	#NULL!	84.9	0	298.4	0	1	0
482	朱绍奎	2017	2017-03-08	137290	62.4	33.2	29.2	1.13699	#NULL!		#NULL!	STEMI	2020-10-11	三支	0	0	1	0	1	0	1	65	0	60	0	8.57	0	158	0	0	224	0	1.06	3.23	0	0.7	0	1.06	0	1.85	0	10	0	63.2	0	438.9	0	0	0
484	刘长军	2017	2017-03-06	136957	77.5	46.2	31.3	1.47604	2017-07-20	陈旧性广泛前壁心梗、左室心尖部附壁血栓	#NULL!	STEMI	#NULL!	单支，左前降	1	0	0	0	1	0	1	53	0	56	0	6.59	0	153	0	0	239	0	1.01	3.16	0	0.8	0	1.01	0	1.79	0	12	0	68.4	0	265.7	0	0	0
486	郭福春	2017	2017-03-15	138227	61.1	36.1	25	1.444	#NULL!		#NULL!	STEMI	2020-10-11	单支，右冠	1	0	0	0	1	0	1	69	1	49	0	7.98	0	158	0	0	275	0	0.82	4.85	0	1.67	0	0.82	1	3.27	0	10	0	119.5	1	317.2	0	0	1
492	刘友	2017	2017-03-07	137149	77.1	41.6	35.5	1.17183	#NULL!		#NULL!	STEMI	2020-10-11	双支，左回旋、左前降	0	1	0	0	1	0	1	67	1	58	0	14.37	1	171	0	0	385	1	0.56	3.27	0	1.81	1	0.56	1	1.89	0	6	0	62.6	0	584.7	1	1	1
494	杜维国	2017	2015-07-11	69513	71.8	39.6	32.2	1.22981	2017-03-16	UA	1	STEMI	#NULL!	三支	0	0	1	0	1	0	1	68	1	73	0	7.19	0	144	0	0	295	0	0.84	5.89	1	3.2	1	0.84	1	3.6	1	10	0	69.9	0	361.2	0	1	1
501	胡玉田	2017	2017-03-24	139410	76.6	41.9	34.7	1.20749	#NULL!		#NULL!	STEMI	2020-10-11	双支，左前降、右冠	0	1	0	0	1	0	1	62	0	45	0	9.5	0	136	0	0	164	0	1.26	7.94	1	1.05	0	1.26	0	6.2	1	70	1	60.4	0	435	0	1	1
504	刘淑芹	2017	2017-03-25	139556	55.5	28.7	26.8	1.0709	#NULL!		#NULL!	STEMI	2020-10-10	三支	0	0	1	0	1	0	0	64	0	55	0	8.16	0	176	0	0	169	0	0.72	3.62	0	1.69	0	0.72	1	2.13	0	33	1	68.5	0	295.4	0	1	0
505	孙杰	2017	2017-03-25	139582	70.6	40.5	30.1	1.34551	2017-07-04	左室心尖部附壁血栓形成	#NULL!	STEMI	2020-10-11	单支，左前降	1	0	0	0	1	0	1	53	0	57	0	14.65	1	155	0	0	187	0	1.17	3.59	0	0.93	0	1.17	0	2	0	260	1	65.3	0	296.6	0	0	1
506	米凤来	2017	2017-03-29	140124	67.2	38.7	28.5	1.35789	2017-11-06	UA	#NULL!	STEMI	#NULL!	三支	0	0	1	0	1	0	1	62	0	42	0	9.1	0	149	0	0	162	0	1	4.57	0	1.37	0	1	0	2.66	0	13	0	62.9	0	203.5	0	1	0
507	赵仕民	2017	2017-03-11	137595	75.2	39.3	35.9	1.09471	#NULL!		#NULL!	STEMI	2020-10-11	双支，左回旋、右冠	0	1	0	0	1	0	1	49	0	35	1	12.23	1	138	0	0	32	0	0.82	5.48	1	3.82	1	0.82	1	2.92	0	#NULL!	#NULL!	61.6	0	300.2	0	1	1
508	李志民	2017	2017-03-30	140183	65.8	37.4	28.4	1.3169	#NULL!		#NULL!	STEMI	2020-10-11	双支，左前降、右冠	0	1	0	0	1	0	1	45	0	#NULL!	#NULL!	11.55	1	128	0	1	226	0	0.89	3.99	0	3.5	1	0.89	1	1.51	0	56	1	54.9	0	302	0	1	0
512	刘永江	2017	2017-03-31	140419	70.8	37.6	33.2	1.13253	#NULL!		#NULL!	STEMI	2020-10-12	双支，左前降、右冠	0	1	0	0	1	0	1	63	0	43	0	9.35	0	134	0	0	210	0	1.88	3.77	0	0.69	0	1.88	0	1.58	0	16	0	57.48	0	220.3	0	0	0
513	王秀珍	2017	2018-06-26	139804	67.1	39.1	28	1.39643	#NULL!		#NULL!	STEMI	2020-10-14	三支	0	0	1	0	1	0	0	71	1	46	0	11.84	1	115	0	1	258	0	1.09	4.69	0	1.6	0	1.09	0	2.72	0	73.45	1	63.66	0	271.1	0	1	0
521	葛瑞	2017	2017-04-09	141421	70	41.9	28.1	1.4911	#NULL!		#NULL!	STEMI	2020-10-12	单支，左前降	1	0	0	0	1	0	1	73	1	68	0	16.3	1	125	0	1	224	0	0.99	3.65	0	1.94	1	0.99	1	1.78	0	166	1	65	0	360.6	0	1	1
522	柴玉枝	2017	2017-04-09	141416	72.2	40.8	31.4	1.29936	#NULL!		#NULL!	STEMI	2020-10-14	三支	0	0	1	0	1	0	0	78	1	41	0	9.5	0	132	0	0	210	0	1.4	5.11	0	1.04	0	1.4	0	2.86	0	16.66	1	113.9	1	238	0	0	1
523	苏彦福	2017	2017-04-10	141439	74.2	41.5	32.7	1.26911	2018-04-25	UA	1	STEMI	2020-10-12	三支	0	0	1	0	1	0	1	60	0	#NULL!	#NULL!	2.47	0	163	0	0	331	0	0.79	4.49	0	5.93	1	0.79	1	1	0	27	1	64.4	0	544.3	1	1	1
524	李长营	2017	2017-04-10	141440	75.3	41.4	33.9	1.22124	2017-07-03	UA	#NULL!	STEMI	#NULL!	单支，左前降	1	0	0	0	1	0	1	49	0	49	0	11.32	1	160	0	0	429	1	0.81	2.88	0	1.08	0	0.81	1	1.58	0	107	1	58.95	0	324.7	0	1	1
528	袁少利	2017	2017-03-30	140292	80.1	41.5	38.6	1.07513	#NULL!		#NULL!	STEMI	2020-10-12	双支，左前降、左回旋	0	1	0	0	1	0	1	60	0	64	0	8.86	0	135	0	0	162	0	1.45	7.65	1	1.93	1	1.45	0	5.32	1	120	1	87.6	0	147.7	0	1	1
533	杨福德	2017	2017-04-21	143212	79.9	45.8	34.1	1.34311	#NULL!		#NULL!	STEMI	2020-10-12	双支，左前降、左回旋	0	1	0	0	1	0	1	53	0	46	0	9.68	1	147	0	0	206	0	1.38	6.23	1	5.93	1	1.38	0	2.15	0	9	0	79.3	0	368.1	0	1	1
535	刘云松	2017	2017-04-12	141934	68.2	39	29.2	1.33562	2017-12-04	UA	#NULL!	STEMI	#NULL!	双支，右冠、左前降	0	1	0	0	1	0	1	52	0	55	0	10.14	1	164	0	0	180	0	0.89	5.43	1	2.46	1	0.89	1	3.42	1	75	1	63.13	0	417.5	0	1	0
537	刘建成	2017	2017-04-18	142766	61.7	39.1	22.6	1.73009	#NULL!		#NULL!	STEMI	2020-10-12	双支，左前降、左回旋	0	1	0	0	1	0	1	51	0	47	0	10.81	1	149	0	0	234	0	1.35	5.58	1	2.09	1	1.35	0	2.66	0	32	1	63.1	0	515.1	1	1	0
539	王飞	2017	2017-04-28	144019	72.8	48.7	24.1	2.02075	#NULL!		#NULL!	STEMI	2020-10-12	双支，左前降、左回旋	0	1	0	0	1	0	1	43	0	54	0	5.21	0	163	0	0	147	0	0.91	4.77	0	1.49	0	0.91	1	3.18	0	16	0	101.9	0	351.3	0	0	1
540	宋显辉	2017	2017-04-30	144213	70.4	46.8	23.6	1.98305	#NULL!		#NULL!	STEMI	2020-10-12	单支，左前降	1	0	0	0	1	0	1	29	0	35	1	14.57	1	151	0	0	244	0	0.89	3.71	0	2.03	1	0.89	1	1.9	0	10	0	78.6	0	442.8	0	1	0
545	廖成富	2017	2017-05-09	145408	68.3	42.4	25.9	1.63707	#NULL!		#NULL!	STEMI	2020-10-12	单支，左前降	1	0	0	0	1	0	1	53	0	58	0	8.78	0	113	0	1	163	0	1.58	4.9	0	1.56	0	1.58	0	2.61	0	12	0	47.69	0	340.9	0	0	1
546	张宝芹	2017	2017-05-09	145532	73.7	40.1	33.6	1.19345	#NULL!		#NULL!	STEMI	2020-10-14	三支	0	0	1	0	1	0	0	57	0	48	0	16.49	1	145	0	0	133	0	1.13	4.16	0	0.98	0	1.13	0	2.33	0	14.78	0	91	0	214.9	0	0	0
547	王广敏	2017	2017-05-10	145690	67.2	38.3	28.9	1.32526	#NULL!		#NULL!	STEMI	2020-10-12	双支，左前降、右冠	0	1	0	0	1	0	1	51	0	54	0	17.52	1	146	0	0	289	0	1.73	5.3	1	1.98	1	1.73	0	2.67	0	21	1	52.7	0	357.1	0	1	1
553	刘淑芹	2017	2017-05-03	144677	63.7	36.3	27.4	1.32482	#NULL!		#NULL!	STEMI	2020-10-11	三支	0	0	1	0	1	0	0	64	0	55	0	5.73	0	116	0	1	212	0	1.14	4.24	0	1.69	0	1.14	0	2.33	0	3	0	51.3	0	323	0	1	0
557	何九龙	2017	2017-05-16	146409	73.5	38	35.5	1.07042	#NULL!		#NULL!	STEMI	2020-10-12	单支，右冠	1	0	0	0	1	0	1	60	0	#NULL!	#NULL!	7.67	0	158	0	0	199	0	0.72	3.69	0	4.77	1	0.72	1	0.8	0	6	0	60.7	0	400.8	0	1	0
558	尹才	2017	2017-05-16	146410	66.7	38.6	28.1	1.37367	#NULL!		#NULL!	STEMI	2020-10-12	单支，右冠	1	0	0	0	1	0	1	49	0	#NULL!	#NULL!	9.26	0	164	0	0	265	0	0.73	4.86	0	5.93	1	0.73	1	1.43	0	16	0	80.7	0	372.8	0	1	0
559	王霙	2017	2017-05-16	146568	63.1	33.8	29.3	1.15358	#NULL!		#NULL!	STEMI	2020-10-12	多支，左主干、左前降、左回旋、右冠	0	0	1	0	1	0	1	59	0	47	0	7.8	0	139	0	0	165	0	1.05	3.72	0	0.39	0	1.05	0	2.49	0	179	1	49.25	0	371.6	0	0	0
560	宋彦华	2017	2017-05-13	146036	77.7	44.3	33.4	1.32635	#NULL!		#NULL!	STEMI	2020-10-14	单支，右冠	1	0	0	0	1	0	0	41	0	51	0	11.72	1	134	0	0	245	0	1.17	5.61	1	1.54	0	1.17	0	3.4	1	17.25	1	50.19	0	125.6	0	0	0
563	吕振华	2017	2017-05-18	146823	74.4	43.7	30.7	1.42345	2019-02-19	UA	#NULL!	STEMI	#NULL!	三支	0	0	1	0	1	0	0	64	0	#NULL!	#NULL!	11.46	1	153	0	0	32	0	0.66	5.93	1	5.93	1	0.66	1	3.62	1	15.53	0	68	0	340.67	0	1	1
565	丁兆华	2017	2017-05-17	146720	72.3	42.9	29.4	1.45918	#NULL!		#NULL!	STEMI	2020-10-12	单支，左前降	1	0	0	0	1	0	1	33	0	42	0	10.63	1	140	0	0	212	0	1.26	3.05	0	0.74	0	1.26	0	1.45	0	15	0	54.8	0	602.5	1	0	0
569	董春树	2017	2017-05-19	146968	64.6	35.8	28.8	1.24306	#NULL!		#NULL!	STEMI	2020-10-12	双支，左前降、右冠	0	1	0	0	1	0	1	59	0	53	0	7.6	0	149	0	0	193	0	1.18	3.32	0	1.14	0	1.18	0	1.62	0	74	1	57.1	0	406.1	0	0	1
570	陈树田	2017	2017-05-20	147046	67.7	39.4	28.3	1.39223	#NULL!		#NULL!	STEMI	2020-10-12	单支，右冠	1	0	0	0	1	0	1	46	0	59	0	9.3	0	143	0	0	340	0	2.11	5.06	0	1.36	0	2.11	0	2.33	0	61	1	85.3	0	413.4	0	0	1
571	王福金	2017	2017-05-23	147367	68.9	40.6	28.3	1.43463	#NULL!		#NULL!	STEMI	2020-10-12	多支，左主干、左前降、左回旋、右冠	0	0	1	0	1	0	1	61	0	24	1	11.35	1	167	0	0	237	0	0.98	4.84	0	0.95	0	0.98	1	3.43	1	43	1	67.6	0	308.1	0	1	1
573	韩克军	2017	2017-05-17	146671	78.6	45.5	33.1	1.37462	#NULL!		#NULL!	陈旧性前间壁心梗	2020-10-12	单支，左前降	1	0	0	0	1	0	1	36	0	70	0	7.42	0	110	0	1	244	0	1.3	4.17	0	1.76	1	1.3	0	2.07	0	6	0	58.76	0	262.3	0	1	0
577	王长治	2017	2017-05-26	147896	75.3	42.6	32.7	1.30275	2019-05-21	冠状动脉性心脏病	1	STEMI	#NULL!	三支	0	0	1	0	1	0	1	52	0	47	0	12.32	1	154	0	0	263	0	1.05	4.97	0	1.51	0	1.05	0	3.23	0	8	0	91.4	0	311.2	0	0	1
578	张洪涛	2017	2017-05-30	148135	72.3	38.4	33.9	1.13274	2018-06-27	UA	0	STEMI	#NULL!	三支	0	0	1	0	1	0	1	70	1	38	1	1.91	0	165	0	0	23	0	0.76	4.56	0	2	1	0.76	1	2.89	0	7	0	70.6	0	353.4	0	1	0
579	乔立强	2017	2017-05-31	148415	72.7	45.2	27.5	1.64364	#NULL!		#NULL!	STEMI	2020-10-12	三支	0	0	1	0	1	0	1	37	0	#NULL!	#NULL!	12.3	1	135	0	0	262	0	0.75	5.04	0	1.99	1	0.75	1	3.39	0	3	0	80	0	464.2	0	1	1
581	石鹏林	2017	2016-12-30	129090	69.6	34.6	35	0.988571	2017-05-24	陈旧性心梗、心源性休克	1	STEMI	#NULL!	双支，左前降支、右冠状动脉	0	1	0	0	1	0	1	67	1	60	0	6.43	0	168	0	0	146	0	1.07	3.68	0	1.04	0	1.07	0	2.21	0	#NULL!	#NULL!	94.7	0	535.3	1	0	1
592	宋金满	2017	2017-06-04	17856	70.2	39.3	30.9	1.27184	#NULL!		#NULL!	STEMI	2020-10-12	三支	0	0	1	0	1	0	1	70	1	#NULL!	#NULL!	12.78	1	151	0	0	19	0	0.78	3.18	0	1.46	0	0.78	1	1.74	0	26	1	63.3	0	434.2	0	1	1
593	张付	2017	2017-06-04	148850	66.2	35	31.2	1.12179	#NULL!		#NULL!	STEMI	2020-10-12	双支，左前降支、右冠状动脉	0	1	0	0	1	0	1	55	0	#NULL!	#NULL!	17.65	1	132	0	0	262	0	0.87	4.55	0	1.85	1	0.87	1	2.84	0	154	1	76.4	0	286.8	0	1	0
594	王秀连	2017	2017-06-05	148981	71.7	35.9	35.8	1.00279	2017-10-16	UA	#NULL!	STEMI	#NULL!	三支	0	0	1	0	1	0	0	73	1	57	0	6.6	0	140	0	0	191	0	0.7	5.82	1	5.93	1	0.7	1	2.42	0	11	0	44	0	421.2	0	1	1
596	邢海	2017	2017-06-05	149079	66.8	37.5	29.3	1.27986	#NULL!		#NULL!	STEMI	2020-10-12	单支，右冠状动脉	1	0	0	0	1	0	1	65	0	59	0	4.81	0	155	0	0	227	0	1.51	3.29	0	0.5	0	1.51	0	1.55	0	8	0	63.3	0	227.4	0	0	0
597	范志军	2017	2017-06-05	149109	73.2	42.1	31.1	1.3537	#NULL!		#NULL!	STEMI	2020-10-12	单支，左回旋支	1	0	0	0	1	0	1	65	0	38	1	7.87	0	108	1	1	244	0	1.05	4.76	0	3.56	1	1.05	0	2.09	0	15	0	37.8	0	325.1	0	1	0
600	王国君	2017	2017-06-12	149817	80.4	44.2	36.2	1.22099	#NULL!		#NULL!	STEMI	2020-10-12	单支，左前降支	1	0	0	0	1	0	1	52	0	53	0	19.21	1	132	0	0	235	0	0.85	4.7	0	5.93	1	0.85	1	1.15	0	114	1	62.9	0	477.4	0	1	0
602	丁耀波	2017	2017-06-12	149904	68	35.4	32.6	1.08589	#NULL!		#NULL!	STEMI	2020-10-12	双支，左前降支、右冠状动脉	0	1	0	0	1	0	1	53	0	65	0	7.52	0	148	0	0	270	0	0.71	3.44	0	1.52	0	0.71	1	2.04	0	8	0	56.3	0	391.3	0	1	0
604	汪双军	2017	2017-06-14	150342	77.5	46.2	31.3	1.47604	#NULL!		#NULL!	STEMI	2020-10-12	双支，左前降支、左回旋支	0	1	0	0	1	0	1	46	0	43	0	8.47	0	161	0	0	300	0	2.33	5.68	1	3.88	1	2.33	0	1.59	0	39	1	54.4	0	489	0	1	0
605	郭树学	2017	2017-06-14	150354	60.6	37.8	22.8	1.65789	#NULL!		#NULL!	STEMI	2020-10-12	三支	0	0	1	0	1	0	1	57	0	48	0	7.81	0	139	0	0	236	0	1.37	5.75	1	3.06	1	1.37	0	2.99	0	86	1	104.3	0	384.6	0	1	0
607	赵立	2017	2017-06-15	150494	85.8	47.9	37.9	1.26385	#NULL!		#NULL!	STEMI	2020-10-12	双支，左前降支、左回旋支	0	1	0	0	1	0	1	47	0	57	0	8.47	0	153	0	0	176	0	1.18	7.48	1	5.27	1	1.18	0	3.9	1	14	0	66.95	0	578.8	0	1	1
609	王金	2017	2017-06-15	150458	72.3	46.4	25.9	1.79151	2018-01-04	UA	#NULL!	STEMI	#NULL!	双支，左回旋支-第一钝缘支、右冠状动脉	0	1	0	0	1	0	1	47	0	#NULL!	#NULL!	15.61	1	145	0	0	543	1	0.93	3.93	0	2.79	1	0.93	1	1.73	0	3	0	68.7	0	416.1	0	1	1
610	李桂芹	2017	2017-06-16	150605	71	41.9	29.1	1.43986	2017-01-06	UA	1	STEMI	#NULL!	三支	0	0	1	0	1	0	0	77	1	59	0	5.67	0	173	0	0	201	0	1.51	6.76	1	1.64	0	1.51	0	4.5	1	11	0	100.7	0	223.4	0	1	1
611	杨俊杰	2017	2017-06-19	151058	79.7	45.7	34	1.34412	#NULL!		#NULL!	STEMI	2020-10-12	双支，左前降支、右冠状动脉	0	1	0	0	1	0	1	52	0	57	0	13.79	1	151	0	0	192	0	0.9	5.97	1	5.77	1	0.9	1	2.45	0	11	0	57.08	0	455.5	0	1	0
612	袁东枝	2017	2017-06-20	151124	70.2	38.6	31.6	1.22152	2018-07-17	UA	1	STEMI	#NULL!	三支	0	0	1	0	1	0	0	68	1	43	0	6.73	0	155	0	0	193	0	1.4	3.93	0	0.76	0	1.4	0	1.95	0	487	1	69.9	0	243.6	0	1	1
617	杜长友	2017	2017-06-22	151357	71.9	40.7	31.2	1.30449	#NULL!		#NULL!	STEMI	2020-10-12	双支，左前降、左回旋	0	1	0	0	1	0	1	70	1	61	0	10.29	1	134	0	0	213	0	0.84	5.08	0	0.97	0	0.84	1	2.89	0	222	1	78	0	355	0	0	1
618	张福来	2017	2017-06-22	151455	68	40	28	1.42857	#NULL!		#NULL!	STEMI	2020-10-12	双支，左回旋、右冠	0	1	0	0	1	0	1	61	0	58	0	9.44	0	121	0	1	251	0	1.63	6.25	1	2.19	1	1.63	0	3.62	1	110	1	91.9	0	256.1	0	1	1
619	巴玉霞	2017	2017-06-23	151562	66.7	37.8	28.9	1.30796	2019-04-23	陈旧性心梗	#NULL!	STEMI	#NULL!	三支	0	0	1	0	1	0	0	70	1	60	0	10.17	1	131	0	0	217	0	1.29	4.47	0	1.43	0	1.29	0	2.53	0	26	1	46.9	0	350.2	0	0	1
628	梅孝君	2017	2017-07-02	152607	74.9	41.9	33	1.2697	#NULL!		#NULL!	STEMI	2020-10-12	双支，左主干、左前降	0	1	0	0	1	0	1	50	0	#NULL!	#NULL!	12.57	1	172	0	0	298	0	0.92	4.49	0	1.77	1	0.92	1	3	0	498	1	88.1	0	270.4	0	1	1
629	陈少强	2017	2017-07-05	153156	69.7	41.5	28.2	1.47163	#NULL!		#NULL!	STEMI	2020-10-12	三支	0	0	1	0	1	0	1	46	0	57	0	5.96	0	166	0	0	180	0	1.01	5.95	1	12.41	1	1.01	0	2.71	0	10	0	59.3	0	373.6	0	1	0
632	胡国峰	2017	2017-06-28	152197	71.3	41.1	30.2	1.36093	#NULL!		#NULL!	STEMI	2020-10-12	单支，左前降	1	0	0	0	1	0	1	46	0	59	0	7.94	0	140	0	0	232	0	0.94	4.67	0	3.54	1	0.94	1	2.63	0	174	1	72.88	0	424.2	0	1	0
636	刘德来	2017	2017-07-08	153450	59.8	34.6	25.2	1.37302	#NULL!		#NULL!	STEMI	2020-10-12	单支，左前降	1	0	0	0	1	0	1	65	0	55	0	7.48	0	149	0	0	155	0	1.35	4.48	0	1.41	0	1.35	0	2.36	0	236	1	89.3	0	284.7	0	0	0
637	倪广智	2017	2017-07-08	153475	69.4	40.4	29	1.3931	#NULL!		#NULL!	STEMI	2020-10-12	双支，左前降、右冠	0	1	0	0	1	0	1	63	0	56	0	10.7	1	145	0	0	165	0	1.04	3.67	0	1.87	1	1.04	0	1.92	0	9	0	95.8	0	389.2	0	1	0
638	袁秉昌	2017	2017-07-12	154152	77.6	44.8	32.8	1.36585	#NULL!		#NULL!	STEMI	2020-10-12	三支	0	0	1	0	1	0	1	54	0	62	0	14.94	1	135	0	0	264	0	0.96	5.46	1	2.58	1	0.96	1	3.34	0	7	0	68	0	494.6	0	1	1
639	石永芳	2017	2017-07-12	154142	57.6	32.2	25.4	1.26772	#NULL!		#NULL!	STEMI	2020-10-14	单支，右冠状动脉	1	0	0	0	1	0	0	83	1	47	0	10.76	1	153	0	0	276	0	0.99	6.67	1	2.67	1	0.99	1	4.28	1	31.08	1	64.9	0	381.8	0	0	1
640	唐凤富	2017	2017-07-15	83205	79	45.8	33.2	1.37952	2018-03-27	UA	#NULL!	STEMI	#NULL!	双支，左前降、左回旋	0	1	0	0	1	0	1	64	0	#NULL!	#NULL!	7.41	0	136	0	0	254	0	1.67	5.6	1	3.12	1	1.67	0	2.83	0	52	1	78.1	0	245.9	0	1	1
641	张立全	2017	2017-07-16	154489	67.7	40	27.7	1.44404	#NULL!		#NULL!	STEMI	2020-10-12	单支，右冠状动脉	1	0	0	0	1	0	1	47	0	63	0	12.64	1	153	0	0	338	0	0.87	3.95	0	1.63	0	0.87	1	2.3	0	3	0	58	0	343.7	0	0	0
643	陈少强	2017	2017-07-05	153156	69.7	41.5	28.2	1.47163	#NULL!		#NULL!	STEMI	2020-10-12	三支	0	0	1	0	1	0	1	46	0	57	0	5.96	0	138	0	0	180	0	1.01	5.95	1	12.41	1	1.01	0	2.71	0	10	0	104.5	0	373.6	0	1	0
644	马金财	2017	2017-07-10	153782	69.9	37.3	32.6	1.14417	#NULL!		#NULL!	STEMI	2020-10-12	双支，左前降、右冠	0	1	0	0	1	0	1	44	0	58	0	9.13	0	119	0	1	282	0	1.02	5.2	1	3.49	1	1.02	0	3	0	26	1	49.03	0	512.2	0	1	1
648	尹淑荣	2017	2017-07-11	153969	67.4	38.8	28.6	1.35664	#NULL!		#NULL!	STEMI	2020-10-16	三支	0	0	1	0	1	0	0	65	0	38	1	5.61	0	130	0	0	323	0	0.93	4.38	0	5.57	1	0.93	1	2.2	0	4.56	0	56.9	0	269.8	0	1	1
650	王万云	2017	2017-07-20	108073	72.8	41	31.8	1.28931	2017-08-07	UA	#NULL!	STEMI	#NULL!	三支	0	0	1	0	1	0	1	63	0	60	0	13.4	1	156	0	0	165	0	1.01	4.88	0	5.45	1	1.01	0	2.55	0	41	1	69.1	0	356.3	0	1	0
651	罗仁秀	2017	2017-02-21	155308	69	39.8	29.2	1.36301	#NULL!		#NULL!	STEMI	2020-10-11	三支	0	0	1	0	1	0	0	60	0	64	0	10.7	1	142	0	0	262	0	0.83	4.59	0	1.39	0	0.83	1	3.13	0	6	0	54.3	0	332.6	0	1	0
652	王成林	2017	2017-07-21	155418	67.9	38.9	29	1.34138	#NULL!		#NULL!	STEMI	2020-10-12	双支，左前降、左回旋	0	1	0	0	1	0	1	59	0	55	0	11.29	1	158	0	0	241	0	1.38	3.79	0	0.82	0	1.38	0	1.85	0	114	1	65.22	0	249.9	0	0	1
653	马静磊	2017	2017-07-21	155350	68	39.4	28.6	1.37762	#NULL!		#NULL!	STEMI	2020-10-12	三支	0	0	1	0	1	0	1	31	0	56	0	15.69	1	160	0	0	343	0	1.17	5.57	1	1.89	1	1.17	0	3.33	0	18	1	52.8	0	388.9	0	1	1
655	于海洋	2017	2017-07-25	155990	74.5	43	31.5	1.36508	#NULL!		#NULL!	STEMI	2020-10-12	单支，右冠状动脉	1	0	0	0	1	0	1	30	0	57	0	6.64	0	142	0	0	177	0	1.15	3.54	0	1.71	1	1.15	0	1.74	0	94	1	41.9	0	366	0	1	0
664	李志军	2017	2017-07-24	155825	72.8	43	29.8	1.44295	#NULL!		#NULL!	STEMI	2020-10-12	单支，左前降	1	0	0	0	1	0	1	46	0	39	1	15.76	1	143	0	0	26	0	1.18	4.39	0	1.29	0	1.18	0	2.44	0	282	1	74.7	0	365.4	0	0	0
668	刘凤林	2017	2017-07-30	156565	63.4	36.4	27	1.34815	#NULL!		#NULL!	STEMI	2020-10-12	三支	0	0	1	0	1	0	1	68	1	#NULL!	#NULL!	8.68	0	151	0	0	18	0	1.37	4.64	0	0.74	0	1.37	0	2.54	0	124	1	69.59	0	352.1	0	0	1
669	宋志贤	2017	2017-08-01	156994	69.2	40.6	28.6	1.41958	#NULL!		#NULL!	STEMI	2020-10-12	单支，右冠状动脉	1	0	0	0	1	0	1	70	1	34	1	1.89	0	165	0	0	238	0	1.29	3.23	0	0.48	0	1.29	0	1.5	0	20	1	79.8	0	402.1	0	0	0
674	刘新产	2017	2017-08-03	157326	67.6	36.3	31.3	1.15974	#NULL!		#NULL!	STEMI	2020-10-12	双支，左回旋、右冠	0	1	0	0	1	0	1	59	0	45	0	9.77	1	142	0	0	155	0	0.88	3.53	0	0.99	0	0.88	1	2.02	0	8	0	78.3	0	394.4	0	0	0
678	张爱坤	2017	2017-08-06	157580	76.2	44.3	31.9	1.38871	#NULL!		#NULL!	STEMI	2020-10-12	双支，左前降、左回旋	0	1	0	0	1	0	1	54	0	44	0	9.13	0	155	0	0	153	0	1.04	4.87	0	3.64	1	1.04	0	2.7	0	53	1	57.6	0	465.8	0	1	1
680	李文喜	2017	2017-08-08	157987	67.3	37.7	29.6	1.27365	#NULL!		#NULL!	STEMI	2020-10-12	单支，右冠状动脉	1	0	0	0	1	0	1	66	1	71	0	9.4	0	127	0	1	214	0	1.17	4.17	0	1.53	0	1.17	0	2.25	0	20	1	53.4	0	250.6	0	0	0
686	李岩	2017	2017-08-11	158318	76.7	42.7	34	1.25588	#NULL!		#NULL!	STEMI	2020-10-12	双支，左前降、左回旋	0	1	0	0	1	0	1	54	0	56	0	12.82	1	135	0	0	241	0	0.89	5.81	1	5.75	1	0.89	1	3.36	0	7	0	64	0	382.5	0	1	0
687	许秀芝	2017	2017-08-12	158458	75.9	41.1	34.8	1.18103	#NULL!		#NULL!	STEMI	2020-10-14	三支	0	0	1	0	1	0	0	65	0	44	0	11.33	1	147	0	0	187	0	1.04	6.6	1	6.75	1	1.04	0	3.77	1	20.96	1	65.24	0	399	0	0	1
688	黄淑芝	2017	2017-08-12	158487	74.9	41.4	33.5	1.23582	#NULL!		#NULL!	STEMI	2020-10-14	三支	0	0	1	0	1	0	0	64	0	39	1	21.6	1	130	0	0	256	0	1.19	5.11	0	1.61	0	1.19	0	2.98	0	13.59	0	60.3	0	362.6	0	1	1
689	耿明军	2017	2017-08-13	158490	59.5	33.7	25.8	1.3062	#NULL!		#NULL!	STEMI	2020-10-12	三支	0	0	1	0	1	0	1	65	0	46	0	8.21	0	127	0	1	289	0	1.72	4.73	0	0.47	0	1.72	0	2.36	0	278	1	52.2	0	255.3	0	0	0
692	姚强	2017	2017-08-03	157374	72.5	42.4	30.1	1.40864	#NULL!		#NULL!	STEMI	2020-10-12	双支，左前降、左回旋	0	1	0	0	1	0	1	51	0	64	0	12.95	1	144	0	0	219	0	1.13	4.64	0	1.05	0	1.13	0	2.7	0	230	1	76.5	0	338.7	0	0	0
698	孔祥水	2017	2017-08-18	159375	67.9	39.6	28.3	1.39929	#NULL!		#NULL!	STEMI	2020-10-12	三支	0	0	1	0	1	0	1	76	1	#NULL!	#NULL!	14.45	1	157	0	0	262	0	0.87	4.01	0	3.15	1	0.87	1	2.2	0	3	0	74.1	0	457.8	0	1	1
699	刘志杰	2017	2017-08-20	159455	78.3	41.5	36.8	1.12772	#NULL!		#NULL!	STEMI	2020-10-12	单支，右冠状动脉	1	0	0	0	1	0	1	52	0	57	0	12.35	1	146	0	0	173	0	1.82	6.41	1	10.73	1	1.82	0	2.6	0	220	1	72.3	0	386.6	0	1	0
700	石井云	2017	2017-08-20	159447	66.3	36.3	30	1.21	#NULL!		#NULL!	STEMI	2020-10-12	三支	0	0	1	0	1	0	1	76	1	59	0	7.88	0	132	0	0	169	0	1.47	4.2	0	0.83	0	1.47	0	2.1	0	13	0	76.3	0	329.3	0	0	1
707	闫海民	2017	2017-08-17	159182	70.9	42.9	28	1.53214	#NULL!		#NULL!	STEMI愈合期	2020-10-12	双支，左前降、右冠	0	1	0	0	1	0	1	53	0	59	0	6.2	0	176	0	0	268	0	0.81	3.34	0	1.71	1	0.81	1	1.85	0	15	0	72.6	0	380.9	0	1	1
709	张立军	2017	2017-08-26	160315	73.4	41.4	32	1.29375	#NULL!		#NULL!	STEMI	2020-10-12	双支，左前降、右冠	0	1	0	0	1	0	1	51	0	43	0	10.76	1	166	0	0	170	0	1.17	7.06	1	5.46	1	1.17	0	4.17	1	99	1	111.7	1	471.8	0	1	1
710	张承烈	2017	2017-08-26	160320	78.1	43.3	34.8	1.24425	#NULL!		#NULL!	STEMI	2020-10-12	双支，左前降、右冠	0	1	0	0	1	0	1	43	0	64	0	12.13	1	133	0	0	305	0	1.13	4.86	0	2.25	1	1.13	0	2.76	0	119	1	53.2	0	535.9	0	1	1
711	孟凡宾	2017	2017-08-28	160604	59.6	35.6	24	1.48333	#NULL!		#NULL!	STEMI	2020-10-12	单支，右冠状动脉	1	0	0	0	1	0	1	46	0	59	0	10.69	1	123	0	1	204	0	1.18	3.27	0	0.4	0	1.18	0	1.63	0	214	1	56	0	350.2	0	0	0
713	商志强	2017	2017-08-29	160761	67.3	35.5	31.8	1.11635	#NULL!		#NULL!	STEMI	2020-10-12	三支	0	0	1	0	1	0	1	50	0	62	0	10.41	1	154	0	0	204	0	0.82	4.9	0	1.44	0	0.82	1	3.12	0	73	1	80.7	0	330.1	0	0	0
715	王凤龙	2017	2017-08-28	160554	68.1	40.8	27.3	1.49451	#NULL!		#NULL!	STEMI	2020-10-12	单支，左前降	1	0	0	0	1	0	1	52	0	62	0	8.68	0	158	0	0	221	0	1.04	3.82	0	1.09	0	1.04	0	2.12	0	37	1	59.9	0	241.4	0	0	0
716	常德宝	2017	2017-08-29	160753	68	38.9	29.1	1.33677	2018-08-17	UA	#NULL!	STEMI	#NULL!	单支，左前降	1	0	0	0	1	0	1	50	0	59	0	8.51	0	151	0	0	140	0	0.88	3.37	0	1.56	0	0.88	1	1.84	0	48	1	63	0	181	0	0	0
718	张金秀	2017	2017-09-04	161495	65.7	36.7	29	1.26552	#NULL!		#NULL!	STEMI	2020-10-12	单支，左前降	1	0	0	0	1	0	1	56	0	48	0	6.29	0	110	0	1	235	0	0.99	3.73	0	1.37	0	0.99	1	2.06	0	3	0	52.46	0	323.1	0	0	0
719	于秀荣	2017	2017-09-04	146633	53.6	32.9	20.7	1.58937	#NULL!		#NULL!	STEMI	2020-10-11	多支，左主干、左前降、左回旋、右冠	0	0	1	0	1	0	0	50	0	69	0	10.34	1	138	0	0	199	0	0.91	4.65	0	3.04	1	0.91	1	2.36	0	7	0	70.3	0	221.3	0	1	1
720	王景龙	2017	2017-08-31	42827	71.7	37.4	34.3	1.09038	#NULL!		#NULL!	STEMI	2020-10-12	双支，左前降、右冠	0	1	0	0	1	0	1	62	0	68	0	6.3	0	110	0	1	219	0	#NULL!	#NULL!	0	#NULL!	0	#NULL!	1	#NULL!	0	#NULL!	#NULL!	59.4	0	264	0	0	0
721	王洪森	2017	2017-09-04	161452	48.4	29.7	18.7	1.58824	2018-06-20	UA	#NULL!	STEMI	#NULL!	三支	0	0	1	0	1	0	1	60	0	#NULL!	#NULL!	11.03	1	122	0	1	314	0	1.01	3.04	0	0.73	0	1.01	0	1.55	0	211	1	99.6	0	161.9	0	0	1
723	鲁彦生	2017	2017-09-06	161877	62.3	40.8	21.5	1.89767	#NULL!		#NULL!	STEMI	2020-10-12	双支，左回旋、右冠	0	1	0	0	1	0	1	55	0	47	0	11.45	1	154	0	0	195	0	1.1	4.66	0	1.39	0	1.1	0	2.71	0	144	1	86.7	0	429.9	0	0	0
724	阮树臣	2017	2017-09-06	157317	73.8	39.6	34.2	1.15789	2017-11-22	HF	#NULL!	STEMI	#NULL!	双支，左前降、左回旋	0	1	0	0	1	0	1	64	0	57	0	8.55	0	136	0	0	202	0	0.93	5.3	1	2.27	1	0.93	1	3.27	0	14	0	73.1	0	432.5	0	1	0
731	王翠金	2018	2018-01-02	177004	72.9	41	31.9	1.28527	#NULL!		#NULL!	STEMI	2020-10-15	单支，左前降	1	0	0	0	1	0	0	44	0	#NULL!	#NULL!	21.62	1	135	0	0	264	0	0.72	5.47	1	5.93	1	0.72	1	3.21	0	13.24	0	65.2	0	376.62	0	1	0
732	陈国文	2018	2018-01-04	98923	67.8	42.7	25.1	1.7012	#NULL!		#NULL!	STEMI	2020-10-12	三支	0	0	1	0	1	0	1	66	1	43	0	11.1	1	150	0	0	276	0	1.14	4.65	0	0.62	0	1.14	0	2.75	0	828	1	68.9	0	346.6	0	0	1
740	徐井良	2018	2018-01-09	178016	59.1	37.6	21.5	1.74884	#NULL!		#NULL!	STEMI	2020-10-12	单支，左前降	1	0	0	0	1	0	1	62	0	61	0	14.85	1	148	0	0	284	0	1.54	5.12	0	0.61	0	1.54	0	2.8	0	300	1	53.4	0	104	0	0	0
741	许书荣	2018	2018-01-10	178194	72.1	39.3	32.8	1.19817	#NULL!		#NULL!	STEMI	2020-10-12	双支，左回旋、右冠	0	1	0	0	1	0	0	63	0	56	0	16.64	1	120	0	1	266	0	1.19	5.15	0	2.53	1	1.19	0	2.3	0	5	0	57.9	0	232.6	0	1	1
742	肖桂芹	2018	2017-12-29	176520	67.1	37.8	29.3	1.2901	#NULL!		#NULL!	STEMI	2020-10-12	三支	0	0	1	0	1	0	0	66	1	56	0	10.28	1	135	0	0	237	0	1.43	4.54	0	0.57	0	1.43	0	2.85	0	29	1	66	0	232.5	0	0	1
751	纪连珠	2018	2018-01-13	178557	72.3	44.5	27.8	1.60072	#NULL!		#NULL!	STEMI	2020-10-14	三支	0	0	1	0	1	0	0	72	1	50	0	11.36	1	155	0	0	78	0	0.76	4.73	0	4.4	1	0.76	1	2.74	0	17.92	1	62.7	0	392.2	0	1	1
752	徐成军	2018	2018-01-13	178563	67	42.8	24.2	1.7686	#NULL!		#NULL!	STEMI	2020-10-13	单支，左前降	1	0	0	0	1	0	1	47	0	56	0	12.1	1	138	0	0	237	0	1.05	3.03	0	0.53	0	1.05	0	1.53	0	107	1	66.3	0	280.7	0	0	0
754	梁占军	2018	2018-01-17	179198	62.2	34.5	27.7	1.24549	#NULL!		#NULL!	STEMI	2020-10-13	单支，左前降	1	0	0	0	1	0	1	63	0	55	0	15.9	1	129	0	1	299	0	1.11	3.25	0	0.74	0	1.11	0	1.64	0	209	1	74.9	0	284.3	0	0	0
756	李万江	2018	2018-01-16	178958	65.3	37.8	27.5	1.37455	2018-07-25	HF心功能II级	#NULL!	STEMI	#NULL!	单支，左前降	1	0	0	0	1	0	1	58	0	43	0	7.39	0	169	0	0	263	0	1.03	2.96	0	1.26	0	1.03	0	1.42	0	11	0	63.5	0	361	0	0	0
757	李清	2018	2018-01-06	177496	83.6	49.1	34.5	1.42319	#NULL!		#NULL!	STEMI	2020-10-13	三支	0	0	1	0	1	0	1	71	1	43	0	8.53	0	137	0	0	174	0	0.95	5.4	1	2.25	1	0.95	1	3.34	0	74	1	94	0	341.7	0	1	1
759	张桂华	2018	2018-01-18	179339	67.6	41	26.6	1.54135	#NULL!		#NULL!	STEMI	2020-10-15	三支	0	0	1	0	1	0	0	50	0	#NULL!	#NULL!	17.98	1	137	0	0	168	0	1.22	5.23	1	1.08	0	1.22	0	3.1	0	48.92	1	95.4	0	314.36	0	0	1
760	李金环	2018	2018-01-19	179447	69.9	39.1	30.8	1.26948	2019-05-20	UA	#NULL!	STEMI	#NULL!	三支	0	0	1	0	1	0	0	64	0	58	0	8.83	0	145	0	0	305	0	0.89	5.68	1	1.64	0	0.89	1	2.86	0	#NULL!	#NULL!	51	0	473.7	0	1	1
761	苏兴华	2018	2018-01-20	179538	67.6	41.3	26.3	1.57034	#NULL!		#NULL!	STEMI	2020-10-13	双支，左前降、右冠	0	1	0	0	1	0	1	41	0	46	0	14.87	1	141	0	0	234	0	1.1	4.73	0	3.41	1	1.1	0	2.56	0	139	1	51.8	0	254.7	0	1	0
762	李景玉	2018	2018-01-22	179866	68.4	39.2	29.2	1.34247	#NULL!		#NULL!	STEMI	2020-10-13	双支，左前降、右冠	0	1	0	0	1	0	1	74	1	54	0	8.1	0	151	0	0	187	0	1.25	5.02	0	0.4	0	1.25	0	2.98	0	182	1	58.9	0	153.4	0	0	1
766	王淑珍	2018	2018-01-19	179383	64.5	39.5	25	1.58	#NULL!		#NULL!	STEMI	2020-10-12	三支	0	0	1	0	1	0	0	68	1	57	0	6.19	0	139	0	0	199	0	0.84	3.92	0	2.11	1	0.84	1	2.12	0	5	0	53	0	308.6	0	1	1
770	马玉秋	2018	2018-01-27	180547	59.23	38.82	20.41	1.90201	#NULL!		#NULL!	STEMI	2020-10-13	单支，右冠	1	0	0	0	1	0	1	40	0	54	0	13.22	1	147	0	0	205	0	0.88	2.95	0	0.41	0	0.88	1	1.62	0	248.8	1	67.72	0	354.5	0	0	0
771	胡维民	2018	2018-01-28	57011	65.67	39.59	26.08	1.51802	#NULL!		#NULL!	STEMI	2020-10-13	双支，左前降、右冠	0	1	0	0	1	0	1	68	1	48	0	10.86	1	148	0	0	211	0	0.74	3.12	0	1.27	0	0.74	1	1.78	0	75.17	1	76.7	0	229.9	0	1	1
775	苏纪兰	2018	2018-01-31	181211	71.66	43.59	28.07	1.5529	2017-05-31	UA	1	STEMI	#NULL!	单支，左回旋	1	0	0	0	1	0	0	58	0	58	0	6.23	0	135	0	0	217	0	1.13	5.14	0	2.95	1	1.13	0	2.67	0	6	0	48.36	0	217.7	0	1	1
776	张宝春	2018	2018-02-01	181253	65.58	37.73	27.85	1.35476	2018-11-12	高血压 UA	#NULL!	STEMI	2020-10-14	单支，左前降	1	0	0	0	1	0	0	63	0	45	0	12.2	1	133	0	0	230	0	0.5	1.97	0	2.04	1	0.5	1	0.97	0	4.84	0	55.99	0	315.2	0	1	1
786	姚丙任	2018	2018-02-02	181436	68.6	39.4	29.2	1.34932	#NULL!		#NULL!	STEMI	2020-10-13	双支，左前降、左回旋	0	1	0	0	1	0	1	79	1	48	0	9.95	1	153	0	0	163	0	1.26	3.45	0	0.85	0	1.26	0	1.67	0	354.47	1	52.88	0	283	0	0	0
787	刘俊生	2018	2018-02-02	101194	75.07	42.72	32.35	1.32056	#NULL!		#NULL!	STEMI	2020-10-13	单支，左前降	1	0	0	0	1	0	1	47	0	45	0	11.53	1	130	0	0	192	0	0.99	7.46	1	1.82	1	0.99	1	4.99	1	196.21	1	53.88	0	334.1	0	1	0
788	马玉英	2018	2018-02-03	181489	71.41	40.89	30.52	1.33978	#NULL!		#NULL!	STEMI	2020-10-12	单支，左前降	1	0	0	0	1	0	0	70	1	58	0	10.81	1	140	0	0	192	0	1.18	3.72	0	1.02	0	1.18	0	2.08	0	15	0	65.74	0	316.3	0	0	0
789	李金成	2018	2018-02-04	181530	59.97	35.27	24.7	1.42794	2018-04-02	UA	1	STEMI	#NULL!	三支	0	0	1	0	1	0	1	49	0	39	1	15.1	1	138	0	0	332	0	0.99	5.29	1	1.17	0	0.99	1	3.32	0	897.31	1	32.92	0	376.2	0	0	0
790	高凤侠	2018	2018-02-04	181581	71.25	41.91	29.34	1.42843	#NULL!		#NULL!	STEMI	2020-10-14	三支	0	0	1	0	1	0	0	83	1	52	0	11.29	1	211	0	0	226	0	1.25	6.23	1	1.08	0	1.25	0	3.88	1	115.53	1	89.89	0	432.7	0	0	1
791	张禄	2018	2018-02-06	96	66.27	37.12	29.15	1.27341	#NULL!		#NULL!	STEMI	2020-10-13	单支，左前降	1	0	0	0	1	0	1	69	1	60	0	14.85	1	140	0	0	172	0	0.9	2.75	0	0.38	0	0.9	1	1.44	0	18.18	1	77.06	0	491.5	0	0	1
793	王文海	2018	2018-02-06	181894	66.7	39.8	26.9	1.47955	#NULL!		#NULL!	STEMI	2020-10-13	双支，左前降、右冠	0	1	0	0	1	0	1	60	0	#NULL!	#NULL!	8.41	0	146	0	0	192	0	1.16	3.85	0	2.14	1	1.16	0	1.94	0	211.01	1	54	0	492	0	1	1
794	邢九洲	2018	2018-02-07	182013	73.2	44.6	28.6	1.55944	#NULL!		#NULL!	STEMI	2020-10-13	双支，右冠、左前降	0	1	0	0	1	0	1	67	1	49	0	9.89	1	141	0	0	206	0	1.2	4.63	0	1.34	0	1.2	0	2.61	0	98.49	1	66.68	0	172	0	0	1
795	管廷德	2018	2018-02-07	182061	66.36	39.04	27.32	1.42899	#NULL!		#NULL!	STEMI	2020-10-13	三支	0	0	1	0	1	0	1	62	0	59	0	10.69	1	159	0	0	294	0	1.44	4.1	0	0.7	0	1.44	0	2.06	0	4.21	0	76.54	0	260.1	0	0	1
796	王勤	2018	2018-02-07	182064	75.68	41.34	34.34	1.20384	#NULL!		#NULL!	STEMI	2020-10-13	双支，左前降、右冠	0	1	0	0	1	0	1	73	1	56	0	6.63	0	160	0	0	193	0	1.36	5.57	1	1.09	0	1.36	0	3.26	0	32.6	1	62.3	0	320.8	0	0	0
800	程玉凤	2018	2018-02-08	182160	63.82	39.3	24.52	1.60277	#NULL!		#NULL!	STEMI	2020-10-14	单支，左前降	1	0	0	0	1	0	0	59	0	40	0	8.9	0	137	0	0	325	0	1.28	5.63	1	2.52	1	1.28	0	3.23	0	257.88	1	72	0	269.7	0	0	1
809	蔡永青	2018	2018-02-05	181805	66.45	39.96	26.49	1.50849	#NULL!		#NULL!	STEMI	2020-10-13	三支	0	0	1	0	1	0	1	55	0	48	0	9.52	1	135	0	0	182	0	1.01	4.73	0	2.05	1	1.01	0	2.77	0	239.39	1	137.4	1	288.9	0	1	1
813	冯锐	2018	2018-02-11	182299	71.21	43.62	27.59	1.58101	#NULL!		#NULL!	STEMI	2020-10-13	单支，左前降	1	0	0	0	1	0	1	39	0	58	0	16.64	1	154	0	0	286	0	0.76	3.53	0	0.45	0	0.76	1	2.17	0	725.81	1	62	0	411.4	0	1	1
815	张国富	2018	2018-02-11	182323	71	44.5	26.5	1.67925	#NULL!		#NULL!	STEMI	2020-10-13	单支，左前降	1	0	0	0	1	0	1	74	1	49	0	7.21	0	156	0	0	168	0	1.52	6.68	1	0.7	0	1.52	0	4.06	1	162.43	1	54.81	0	335	0	1	0
816	李井满	2018	2018-02-11	182327	75.04	45.09	29.95	1.50551	#NULL!		#NULL!	STEMI	2020-10-13	三支	0	0	1	0	1	0	1	53	0	43	0	7.13	0	132	0	0	224	0	1.27	4.49	0	0.72	0	1.27	0	2.5	0	52.31	1	80.7	0	153.9	0	0	0
817	刘彦青	2018	2018-02-11	182349	69.8	42.28	27.52	1.53634	#NULL!		#NULL!	STEMI	2020-10-12	单支，左前降	1	0	0	0	1	0	0	55	0	58	0	10.16	1	133	0	0	164	0	0.96	2.84	0	1.29	0	0.96	1	1.29	0	10	0	61.47	0	331.2	0	1	1
821	刘宝全	2018	2018-02-12	182420	71.15	43.62	27.53	1.58445	#NULL!		#NULL!	STEMI	2020-10-13	单支，左前降	1	0	0	0	1	0	1	51	0	55	0	14.73	1	163	0	0	278	0	1.18	5.58	1	2.07	1	1.18	0	3.31	0	179.7	1	70.6	0	330.5	0	1	0
822	李才	2018	2018-02-13	182440	77.6	45.36	32.24	1.40695	#NULL!		#NULL!	STEMI	2020-10-13	单支，左前降	1	0	0	0	1	0	1	42	0	70	0	7.7	0	106	0	1	268	0	1.31	4.9	0	1.94	1	1.31	0	2.68	0	26.67	1	47.5	0	316.8	0	1	0
825	胡孝江	2018	2018-02-16	182621	75.71	45.95	29.76	1.54402	#NULL!		#NULL!	STEMI	2020-10-13	单支，右冠	1	0	0	0	1	0	1	54	0	53	0	15.47	1	148	0	0	183	0	0.9	3.01	0	0.64	0	0.9	1	1.62	0	356	1	66.88	0	365.8	0	0	1
826	迟彦如	2018	2018-02-16	182606	61.1	35.1	26	1.35	#NULL!		#NULL!	STEMI	2020-10-13	双支，左前降、左回旋	0	1	0	0	1	0	1	62	0	60	0	10.89	1	162	0	0	238	0	1.27	4.38	0	0.89	0	1.27	0	2.4	0	262.96	1	58.55	0	330.4	0	0	1
828	袁秀英	2018	2018-02-18	182744	68.59	39.04	29.55	1.32115	#NULL!		#NULL!	STEMI	2020-10-14	双支，左前降、左回旋	0	1	0	0	1	0	0	50	0	49	0	12.97	1	142	0	0	300	0	1.09	5.18	0	0.81	0	1.09	0	3.19	0	137.54	1	54.58	0	247.6	0	0	1
829	王凤永	2018	2018-02-19	182792	68.86	40.33	28.53	1.4136	#NULL!		#NULL!	STEMI	2020-10-13	单支，右冠	1	0	0	0	1	0	1	59	0	#NULL!	#NULL!	12.33	1	133	0	0	283	0	1.7	4.44	0	0.85	0	1.7	0	2.11	0	202.67	1	79.8	0	220.8	0	0	0
830	王洋	2018	2018-02-21	182929	66.05	35.51	30.54	1.16274	#NULL!		#NULL!	STEMI	2020-10-13	单支，右冠	1	0	0	0	1	0	1	63	0	62	0	10.44	1	127	0	1	218	0	0.84	3.85	0	0.53	0	0.84	1	2.36	0	111.04	1	77.45	0	241.9	0	0	1
832	邓海江	2018	2018-02-22	125441	73.24	44.09	29.15	1.51252	2018-04-06	UA	#NULL!	STEMI	#NULL!	多支，左前降、中间支、左回旋、右冠	0	0	1	0	1	0	1	61	0	52	0	8.4	0	154	0	0	220	0	1	3.22	0	1.74	1	1	0	1.6	0	61.99	1	83	0	378.3	0	1	1
833	张富华	2018	2018-02-22	183296	72.1	42.9	29.2	1.46918	#NULL!		#NULL!	STEMI	2020-10-13	单支，右冠	1	0	0	0	1	0	1	58	0	#NULL!	#NULL!	13.28	1	179	0	0	142	0	1.38	6.16	1	1.43	0	1.38	0	3.68	1	158.77	1	65.37	0	428	0	1	0
837	宋保全	2018	2018-02-23	183562	69.67	38.06	31.61	1.20405	#NULL!		#NULL!	STEMI	2020-10-13	三支	0	0	1	0	1	0	1	59	0	47	0	12.6	1	135	0	0	179	0	0.87	4.96	0	0.74	0	0.87	1	3.2	0	188.47	1	68.41	0	331.1	0	0	0
838	刘宝华	2018	2018-02-24	183598	76.41	44.2	32.21	1.37224	#NULL!		#NULL!	STEMI	2020-10-13	单支，右冠	1	0	0	0	1	0	1	60	0	57	0	11.81	1	164	0	0	216	0	1.33	4.76	0	1.29	0	1.33	0	2.62	0	32.38	1	82.4	0	297.8	0	0	0
840	于国栋	2018	2018-02-25	183771	66.99	38.66	28.33	1.36463	#NULL!		#NULL!	STEMI	2020-10-13	单支，右冠	1	0	0	0	1	0	1	47	0	64	0	9.17	0	162	0	0	177	0	0.68	3.15	0	1.47	0	0.68	1	1.83	0	29.95	1	73.43	0	339.1	0	1	0
841	王立春	2018	2018-02-25	183803	86.67	50.47	36.2	1.3942	#NULL!		#NULL!	STEMI	2020-10-13	单支，左前降	1	0	0	0	1	0	1	53	0	56	0	9.92	1	159	0	0	223	0	1.22	5.97	1	3.55	1	1.22	0	3.45	1	13.6	0	71.69	0	466.1	0	1	1
842	付江	2018	2018-02-25	183808	73.2	44.52	28.68	1.5523	#NULL!		#NULL!	STEMI	2020-10-13	双支，左前降、左回旋	0	1	0	0	1	0	1	54	0	37	1	7.24	0	136	0	0	224	0	2.04	4.65	0	1.55	0	2.04	0	1.93	0	27.16	1	58.58	0	410.3	0	0	1
843	郑忠信	2018	2018-02-26	183832	70.23	37.88	32.35	1.17094	2018-05-14	UA	#NULL!	STEMI	#NULL!	单支，左前降	1	0	0	0	1	0	1	77	1	56	0	7.45	0	156	0	0	170	0	0.87	3.08	0	0.79	0	0.87	1	1.69	0	51.06	1	65.11	0	254.7	0	0	1
844	陈海	2018	2018-02-27	184136	69.4	39.5	29.9	1.32107	#NULL!		#NULL!	STEMI	2020-10-13	双支，左前降、右冠	0	1	0	0	1	0	1	53	0	56	0	10.56	1	157	0	0	132	0	1.01	3.55	0	0.85	0	1.01	0	1.95	0	98.21	1	81.77	0	434.3	0	0	1
847	李富荣	2018	2018-02-28	184407	71.05	39.3	31.75	1.2378	#NULL!		#NULL!	STEMI	2020-10-12	三支	0	0	1	0	1	0	0	81	1	71	0	11.19	1	129	0	1	238	0	0.8	3.35	0	2.1	1	0.8	1	1.6	0	8	0	106.64	0	318.3	0	0	0
848	曾庆义	2018	2018-02-28	184374	69.36	37.23	32.13	1.15873	#NULL!		#NULL!	STEMI	2020-10-13	三支	0	0	1	0	1	0	1	84	1	41	0	6.1	0	158	0	0	233	0	0.87	2.72	0	0.95	0	0.87	1	1.39	0	3.3	0	88.6	0	305.6	0	0	1
859	白永新	2018	2018-03-04	184829	82.93	45.54	37.39	1.21797	#NULL!		#NULL!	STEMI	2020-10-13	三支	0	0	1	0	1	0	1	42	0	64	0	11.89	1	135	0	0	291	0	0.94	5.16	0	5.15	1	0.94	1	2.86	0	41.28	1	99.81	0	260.7	0	1	1
860	张永民	2018	2018-03-04	184833	74.39	40.73	33.66	1.21004	#NULL!		#NULL!	STEMI	2020-10-13	三支	0	0	1	0	1	0	1	72	1	46	0	9.76	1	129	0	1	263	0	1.16	4.05	0	0.71	0	1.16	0	2.24	0	52.02	1	76.3	0	434.2	0	0	1
861	丁淑英	2018	2018-03-04	184857	67.79	38.67	29.12	1.32795	2019-01-14	UA	1	STEMI	#NULL!	单支，右冠	1	0	0	0	1	0	0	79	1	65	0	7.75	0	148	0	0	158	0	1.01	4.56	0	2.33	1	1.01	0	2.49	0	6	0	82.86	0	248.2	0	0	0
863	王顺	2018	2018-03-05	184875	60.69	33.55	27.14	1.23618	#NULL!		#NULL!	STEMI	2020-10-13	三支	0	0	1	0	1	0	1	55	0	#NULL!	#NULL!	2.7	0	162	0	0	19	0	0.93	3.58	0	0.78	0	0.93	1	2.04	0	211.06	1	59.28	0	342.8	0	0	0
864	段长海	2018	2018-03-05	185161	65.49	37.82	27.67	1.36682	#NULL!		#NULL!	STEMI	2020-10-13	三支	0	0	1	0	1	0	1	56	0	62	0	14.5	1	140	0	0	184	0	1.11	4.22	0	1.74	1	1.11	0	2.31	0	322.4	1	47.5	0	331.3	0	1	0
870	王延义	2018	2018-03-06	175767	74.19	46.63	27.56	1.69194	#NULL!		#NULL!	STEMI恢复期	2020-10-13	单支，左前降	1	0	0	0	1	0	1	55	0	56	0	5.92	0	118	1	1	175	0	1.08	3.79	0	2.28	1	1.08	0	1.94	0	8.65	0	77.61	0	425.9	0	1	0
872	王建民	2018	2018-03-08	185540	66.71	38.92	27.79	1.4005	#NULL!		#NULL!	STEMI	2020-10-13	单支，右冠	1	0	0	0	1	0	1	50	0	47	0	12.99	1	181	0	0	282	0	0.83	4.72	0	1.83	1	0.83	1	2.93	0	62.52	1	45.8	0	561.8	1	1	1
874	贺祥	2018	2018-03-10	185872	64.58	40.08	24.5	1.63592	#NULL!		#NULL!	STEMI	2020-10-13	双支，左前降、左回旋	0	1	0	0	1	0	1	46	0	57	0	8.95	0	115	1	1	196	0	1.46	5.63	1	1.41	0	1.46	0	3.2	0	88.45	1	48.4	0	347	0	1	0
878	胡万	2018	2018-03-11	185931	70.45	41.95	28.5	1.47193	#NULL!		#NULL!	STEMI	2020-10-13	单支，右冠	1	0	0	0	1	0	1	70	1	57	0	13.84	1	136	0	0	238	0	1.15	5.81	1	1.76	1	1.15	0	3.55	1	17.32	1	64.03	0	302	0	1	1
881	张忠政	2018	2018-03-13	186386	67.12	38.1	29.02	1.31289	#NULL!		#NULL!	STEMI	2020-10-13	双支，左前降、左回旋	0	1	0	0	1	0	1	77	1	58	0	8.22	0	128	0	1	319	0	0.95	3.94	0	0.47	0	0.95	1	2.35	0	55.5	1	87.22	0	292	0	0	0
882	梁君	2018	2018-03-14	186405	76.98	44.46	32.52	1.36716	#NULL!		#NULL!	STEMI	2020-10-13	三支	0	0	1	0	1	0	1	59	0	67	0	9.39	0	163	0	0	273	0	1.25	4.76	0	2.21	1	1.25	0	2.59	0	11.3	0	62.34	0	415.9	0	1	1
883	尹增	2018	2018-03-14	186518	73.25	44.57	28.68	1.55404	#NULL!		#NULL!	STEMI	2020-10-13	单支，左回旋	1	0	0	0	1	0	1	51	0	71	0	9.54	1	121	0	1	224	0	1.38	5.89	1	1.71	1	1.38	0	3.44	1	210.57	1	71	0	228.8	0	1	0
891	陈玉霞	2018	2018-03-16	186854	68.5	39.38	29.12	1.35234	#NULL!		#NULL!	STEMI	2020-10-14	三支	0	0	1	0	1	0	0	74	1	48	0	10.43	1	151	0	0	243	0	0.77	4.98	0	2.11	1	0.77	1	3.16	0	124.1	1	74.85	0	332.4	0	1	1
892	郭臣	2018	2018-03-18	186975	73.47	42.91	30.56	1.40412	2018-03-30	STEMI亚急性期 UA	#NULL!	STEMI	#NULL!	单支，左前降	1	0	0	0	1	0	1	65	0	54	0	7.7	0	133	0	0	212	0	0.89	5.18	0	1.11	0	0.89	1	3.32	0	13.23	0	126.3	1	286	0	0	1
893	潘维学	2018	2018-03-19	187054	58.6	32.13	26.47	1.21383	#NULL!		#NULL!	STEMI	2020-10-13	双支，左前降、左回旋	0	1	0	0	1	0	1	74	1	42	0	7.18	0	132	0	0	216	0	1.22	3.87	0	0.44	0	1.22	0	2.08	0	247.75	1	65.64	0	502	0	0	1
894	付建华	2018	2018-03-20	53596	68.88	41.67	27.21	1.53142	#NULL!		#NULL!	STEMI	2020-10-13	三支	0	0	1	0	1	0	1	56	0	60	0	7.71	0	150	0	0	198	0	0.9	3.48	0	0.95	0	0.9	1	1.97	0	12.95	0	60.24	0	273.9	0	0	1
900	李淑霞	2018	2018-03-23	82145	70.1	43.4	26.7	1.62547	#NULL!		#NULL!	STEMI	2020-10-12	双支，左前降、右冠	0	1	0	0	1	0	0	75	1	61	0	6.65	0	183	0	0	163	0	1.18	4.02	0	1.28	0	1.18	0	2.03	0	#NULL!	#NULL!	86.96	0	352.3	0	0	1
902	赵云海	2018	2018-03-25	187975	65.6	40.26	25.34	1.58879	#NULL!		#NULL!	STEMI	2020-10-13	单支，右冠	1	0	0	0	1	0	1	55	0	66	0	16.77	1	158	0	0	233	0	1.15	5.97	1	1.39	0	1.15	0	3.72	1	198.95	1	67.41	0	236	0	1	1
904	朱国信	2018	2018-03-28	188571	56.78	32.97	23.81	1.38471	#NULL!		#NULL!	STEMI	2020-10-13	双支，左回旋、右冠	0	1	0	0	1	0	1	69	1	#NULL!	#NULL!	1.81	0	147	0	0	262	0	1.21	3.6	0	1.15	0	1.21	0	1.8	0	29.96	1	86	0	199.6	0	0	1
908	赵学成	2018	2018-03-29	188659	60.63	36.55	24.08	1.51786	#NULL!		#NULL!	STEMI	2020-10-13	三支	0	0	1	0	1	0	1	53	0	41	0	12.39	1	147	0	0	261	0	1.31	5.21	1	1.44	0	1.31	0	2.98	0	18.31	1	79	0	296.5	0	1	0
912	李广银	2018	2018-03-01	184599	64.88	37.29	27.59	1.35158	#NULL!		1	STEMI	2020-10-13	双支，左前降、右冠	0	1	0	0	1	0	1	55	0	57	0	6.75	0	164	0	0	291	0	0.79	4.91	0	1.73	1	0.79	1	3.12	0	3.85	0	63.8	0	395.3	0	1	0
914	许贺龙	2018	2018-03-31	188905	76.5	42.19	34.31	1.22967	#NULL!		#NULL!	STEMI	2020-10-13	三支	0	0	1	0	1	0	1	47	0	57	0	20.49	1	125	0	1	262	0	1.05	6.21	1	1.56	0	1.05	0	3.97	1	286.15	1	68.97	0	290	0	1	0
918	康树林	2018	2018-04-04	189344	70.71	38.36	32.35	1.18578	#NULL!		#NULL!	STEMI	2020-10-13	双支，左前降、左回旋	0	1	0	0	1	0	1	64	0	66	0	8.15	0	144	0	0	177	0	1.1	3.77	0	0.62	0	1.1	0	2.07	0	69.91	1	57.2	0	325.7	0	0	1
919	胡宝勤	2018	2018-04-04	18590	69.79	37.26	32.53	1.1454	#NULL!		#NULL!	STEMI	2020-10-13	双支，左前降、右冠	0	1	0	0	1	0	1	61	0	#NULL!	#NULL!	7.81	0	142	0	0	244	0	1.01	3.21	0	1.22	0	1.01	0	1.64	0	16.44	1	76.12	0	209.8	0	0	0
921	杨喜斌	2018	2018-04-05	189497	65.29	37.32	27.97	1.33429	#NULL!		#NULL!	STEMI	2020-10-13	双支，左前降、左回旋	0	1	0	0	1	0	1	60	0	66	0	12.75	1	160	0	0	231	0	1.67	5.12	0	0.55	0	1.67	0	2.71	0	131.22	1	78.66	0	282.5	0	0	1
922	杨金楠	2018	2018-04-05	189517	63.18	39.98	23.2	1.72328	#NULL!		#NULL!	STEMI	2020-10-13	三支	0	0	1	0	1	0	1	33	0	57	0	21.5	1	116	0	1	216	0	1.13	4.15	0	2.33	1	1.13	0	2.18	0	504.86	1	57.4	0	348	0	1	0
926	方文仕	2018	2018-04-08	189676	63.2	38.5	24.7	1.5587	#NULL!		#NULL!	STEMI	2020-10-13	单支，左前降	1	0	0	0	1	0	1	65	0	58	0	5.37	0	147	0	0	171	0	1.34	4.61	0	0.72	0	1.34	0	2.54	0	261.87	1	68.04	0	356	0	0	1
927	刘文明	2018	2018-04-06	189552	70.71	37.92	32.79	1.15645	#NULL!		#NULL!	STEMI	2020-10-13	双支，左前降、右冠	0	1	0	0	1	0	1	51	0	54	0	11.13	1	129	0	1	275	0	0.9	4.68	0	1.48	0	0.9	1	2.88	0	72.74	1	60.47	0	333.4	0	0	1
928	王文革	2018	2018-04-08	189889	64.61	36.5	28.11	1.29847	#NULL!		#NULL!	STEMI	2020-10-13	双支，左回旋、右冠	0	1	0	0	1	0	1	59	0	55	0	11.3	1	138	0	0	291	0	1.35	4.97	0	0.41	0	1.35	0	2.86	0	348.21	1	53.1	0	202.2	0	0	0
931	朱振强	2018	2018-04-11	190452	68.27	41.26	27.01	1.52758	#NULL!		#NULL!	STEMI	2020-10-13	单支，右冠	1	0	0	0	1	0	1	52	0	62	0	11.35	1	153	0	0	184	0	1.66	4.23	0	0.4	0	1.66	0	2.02	0	282.73	1	66	0	314.8	0	0	0
934	李景东	2018	2018-04-12	190608	65.36	37.24	28.12	1.32432	#NULL!		#NULL!	STEMI	2020-10-13	三支	0	0	1	0	1	0	1	48	0	68	0	9.7	1	162	0	0	172	0	1.11	4.29	0	1.1	0	1.11	0	2.43	0	157.43	1	62.1	0	214.9	0	0	0
935	刘福录	2018	2018-04-13	190695	64.52	36.4	28.12	1.29445	#NULL!		#NULL!	STEMI	2020-10-13	单支，左前降	1	0	0	0	1	0	1	66	1	44	0	21.12	1	151	0	0	265	0	1.19	3.52	0	0.43	0	1.19	0	1.82	0	119.27	1	66.77	0	173.3	0	0	0
936	张宝	2018	2018-04-13	190742	66.95	38.35	28.6	1.34091	#NULL!		#NULL!	STEMI	2020-10-13	三支	0	0	1	0	1	0	1	53	0	#NULL!	#NULL!	18	1	172	0	0	273	0	1.08	5.68	1	0.83	0	1.08	0	3.6	1	283.44	1	51.63	0	307.4	0	1	1
937	于光	2018	2018-04-15	190824	71.32	42.22	29.1	1.45086	#NULL!		#NULL!	STEMI	2020-10-13	单支，右冠	1	0	0	0	1	0	1	45	0	57	0	9.48	0	133	0	0	152	0	0.8	4.05	0	1.88	1	0.8	1	2.41	0	72.52	1	90.9	0	364.7	0	1	1
940	宋文祥	2018	2018-04-17	191130	64.66	35.35	29.31	1.20607	#NULL!		#NULL!	STEMI	2020-10-13	单支，左前降	1	0	0	0	1	0	1	70	1	59	0	9.44	0	127	0	1	222	0	1.36	4.28	0	0.39	0	1.36	0	2.3	0	349.48	1	45.77	0	197.5	0	0	0
942	张树军	2018	2018-04-12	190601	73.94	40.36	33.58	1.20191	#NULL!		#NULL!	STEMI	2020-10-13	三支	0	0	1	0	1	0	1	54	0	58	0	9.19	0	144	0	0	287	0	1.05	4.39	0	1.13	0	1.05	0	2.56	0	50.81	1	52.5	0	405.7	0	0	1
943	周志文	2018	2018-04-17	191275	61.24	40.12	21.12	1.89962	#NULL!		#NULL!	STEMI	2020-10-13	三支	0	0	1	0	1	0	1	65	0	56	0	5.65	0	127	0	1	210	1	2.5	3.77	0	0.47	0	2.5	0	0.97	0	121.48	1	65.3	0	277.5	0	0	0
945	黄福	2018	2018-04-18	191423	67.27	39.55	27.72	1.42677	#NULL!		#NULL!	STEMI	2020-10-13	单支，左前降	1	0	0	0	1	0	1	57	0	48	0	7.7	0	135	0	0	165	0	1.42	3.61	0	2.78	1	1.42	0	1.47	0	38.58	1	79	0	293.7	0	1	0
948	高景昀	2018	2018-04-21	191716	63.23	37.9	25.33	1.49625	#NULL!		#NULL!	STEMI	2020-10-13	单支，左回旋	1	0	0	0	1	0	1	44	0	55	0	8.45	0	89	1	1	215	0	1	4.65	0	0.7	0	1	0	2.85	0	389.67	1	55.2	0	256.8	0	0	0
949	张艳芹	2018	2018-04-23	191848	69.27	39.14	30.13	1.29904	#NULL!		#NULL!	STEMI	2020-10-12	单支，右冠	1	0	0	0	1	0	0	47	0	56	0	8.41	0	147	0	0	431	1	1.08	7.35	1	6.83	1	1.08	0	3.69	1	#NULL!	#NULL!	63.5	0	262.7	0	1	0
952	尹建国	2018	2018-04-24	192157	64.01	35.82	28.19	1.27066	#NULL!		#NULL!	STEMI	2020-10-13	三支	0	0	1	0	1	0	1	66	1	63	0	11.38	1	156	0	0	213	0	1.11	4.23	0	1.6	0	1.11	0	2.34	0	222.47	1	75.99	0	227.8	0	0	1
955	白续山	2018	2018-04-25	192294	68.75	39.79	28.96	1.37396	#NULL!		#NULL!	STEMI	2020-10-13	三支	0	0	1	0	1	0	1	75	1	55	0	9.93	1	140	0	0	240	1	1.1	4.41	0	0.5	0	1.1	0	2.6	0	122.88	1	84.81	0	290.6	0	0	1
956	韩兴满	2018	2018-04-25	192383	70.27	40.48	29.79	1.35885	#NULL!		#NULL!	STEMI	2020-10-13	单支，右冠	1	0	0	0	1	0	1	51	0	#NULL!	#NULL!	7.9	0	156	0	0	29	0	1.13	3.19	0	0.52	0	1.13	0	1.6	0	87.96	1	63.42	0	306.3	0	0	1
962	刘伟	2018	2018-04-26	192440	78.06	46.46	31.6	1.47025	#NULL!		#NULL!	STEMI	2020-10-13	单支，左前降	1	0	0	0	1	0	1	33	0	63	0	12.82	1	119	1	1	180	1	1.1	4.88	0	1.62	0	1.1	0	2.86	0	6.36	0	113.61	1	495.1	0	0	1
963	关立成	2018	2018-04-27	192645	59.27	33.77	25.5	1.32431	#NULL!		#NULL!	STEMI	2020-10-13	三支	0	0	1	0	1	0	1	70	1	49	0	16.36	1	152	0	0	233	0	2.1	4.74	0	0.48	0	2.1	0	2.06	0	71.9	1	66.7	0	378.2	0	0	1
964	王书华	2018	2018-04-27	192631	74.6	38.9	35.7	1.08964	#NULL!		#NULL!	STEMI	2020-10-15	双支，左前降、右冠	0	1	0	0	1	0	0	70	1	#NULL!	#NULL!	14.17	1	137	0	0	248	0	1.08	5.88	1	1.41	0	1.08	0	3.7	1	21.17	1	47.1	0	429.84	0	0	1
970	周玉顺	2018	2018-04-28	192748	66.83	36.06	30.77	1.17192	#NULL!		#NULL!	STEMI	2020-10-13	双支，左前降、右冠	0	1	0	0	1	0	1	59	0	39	1	15.54	1	108	1	1	284	0	1.05	4.39	0	1.87	1	1.05	0	2.49	0	45.62	1	64	0	280.3	0	1	1
971	夏桂芝	2018	2018-04-29	192807	66.34	38.53	27.81	1.38547	#NULL!		#NULL!	STEMI	2020-10-15	双支，左前降、左回旋	0	1	0	0	1	0	0	71	1	#NULL!	#NULL!	5.91	0	143	0	0	177	0	1.75	5.65	1	2.25	1	1.75	0	2.9	0	33.37	1	74.6	0	261.29	0	0	0
972	马玉荣	2018	2018-05-02	193114	73.79	43.72	30.07	1.45394	#NULL!		#NULL!	STEMI	2020-10-15	双支，左前降、右冠	0	1	0	0	1	0	0	70	1	#NULL!	#NULL!	7.89	0	147	0	0	189	0	0.88	6.02	1	5.97	1	0.88	1	3.52	1	20.12	1	78.13	0	363.26	0	0	0
973	李金林	2018	2018-05-03	193421	62.86	37.45	25.41	1.47383	#NULL!		#NULL!	STEMI	2020-10-13	单支，右冠	1	0	0	0	1	0	1	54	0	#NULL!	#NULL!	7.42	0	145	0	0	214	0	1.7	3.73	0	0.53	0	1.7	0	1.57	0	18.76	1	63.08	0	223.8	0	0	0
976	高瑞荣	2018	2018-04-30	192814	81.55	42.57	38.98	1.0921	#NULL!		#NULL!	STEMI	2020-10-14	双支，左前降、左回旋	0	1	0	0	1	0	0	66	1	49	0	11.54	1	132	0	0	238	0	0.9	3.87	0	3.18	1	0.9	1	2.06	0	15.58	0	51.7	0	437	0	0	1
979	白小龙	2018	2018-05-03	192189	73.7	43.14	30.56	1.41165	#NULL!		#NULL!	STEMI	2020-10-13	单支，左回旋	1	0	0	0	1	0	1	35	0	47	0	12.61	1	167	0	0	155	0	0.97	3.11	0	2.12	1	0.97	1	1.5	0	7.05	0	72.76	0	338.6	0	1	0
981	张淑芹	2018	2018-05-04	193527	55.69	30.53	25.16	1.21343	#NULL!		#NULL!	STEMI	2020-10-16	双支，左前降、右冠	0	1	0	0	1	0	0	77	1	47	0	6.11	0	164	0	0	394	1	1.21	3.69	0	0.92	0	1.21	0	1.89	0	6.98	0	75.5	0	308	0	1	0
984	刘井武	2018	2018-05-04	193530	68.03	37.02	31.01	1.19381	#NULL!		#NULL!	STEMI	2020-10-13	双支，左前降、中间支	0	1	0	0	1	0	1	67	1	58	0	8.13	0	151	0	0	218	0	1.15	4.52	0	1.29	0	1.15	0	2.57	0	80.55	1	78.29	0	340.4	0	0	1
986	李洪涛	2018	2018-04-21	191760	74.03	45.96	28.07	1.63734	#NULL!		#NULL!	STEMI	2020-10-13	单支，左前降	1	0	0	0	1	0	1	48	0	45	0	3.39	0	141	0	0	229	0	1.1	4.32	0	1.31	0	1.1	0	2.45	0	4.09	0	83.92	0	463.4	0	0	1
987	杨庆林	2018	2018-05-07	191505	74.78	43.92	30.86	1.4232	#NULL!		#NULL!	STEMI	2020-10-13	三支	0	0	1	0	1	0	1	78	1	60	0	7.99	0	159	0	0	169	0	1.03	3.57	0	1.13	0	1.03	0	1.92	0	72.84	1	68.18	0	452.9	0	0	1
989	朱淑珍	2018	2018-05-07	194005	64.5	34.4	30.1	1.14286	#NULL!		#NULL!	STEMI	2020-10-12	双支，左前降、右冠	0	1	0	0	1	0	0	83	1	60	0	10.36	1	155	0	0	282	0	1.05	4.32	0	2.42	1	1.05	0	2.37	0	10	0	76	0	180.8	0	0	1
994	李珍	2018	2018-05-10	194509	62.51	36.35	26.16	1.38953	2018-07-23	UA	1	STEMI	#NULL!	三支	0	0	1	0	1	0	0	48	0	57	0	10.15	1	145	0	0	309	1	1	3.1	0	1.4	0	1	0	1.54	0	33	1	56.2	0	164.1	0	0	0
998	董猛	2018	2018-05-12	194668	77.91	46.23	31.68	1.45928	#NULL!		#NULL!	STEMI	2020-10-13	双支，左前降、左回旋	0	1	0	0	1	0	1	52	0	59	0	8.52	0	160	0	0	219	0	1.88	6.8	1	3.57	1	1.88	0	3.58	1	283.49	1	52.37	0	449	0	1	0
999	高则岗	2018	2018-05-12	194670	64.14	36.94	27.2	1.35809	#NULL!		#NULL!	STEMI	2020-10-18	双支，左前降、右冠	0	1	0	0	1	0	1	54	0	#NULL!	#NULL!	1.19	0	166	0	0	289	0	1.42	5.47	1	1.28	0	1.42	0	3.11	0	71.05	1	78.7	0	316.2	0	1	1
1000	迟桂耀	2018	2018-05-12	194736	74.71	45.53	29.18	1.56032	2018-07-24	陈旧性心梗	1	STEMI	#NULL!	三支	0	0	1	0	1	0	1	45	0	54	0	12.9	1	150	0	0	283	0	0.82	5.45	1	2.25	1	0.82	1	3.48	1	14.55	0	67.6	0	326.4	0	1	1
1001	刘宝军	2018	2018-05-14	194920	66	43.3	22.7	1.90749	#NULL!		#NULL!	STEMI	2020-10-13	三支	0	0	1	0	1	0	1	47	0	42	0	14.75	1	152	0	0	309	1	0.69	4.05	0	1.53	0	0.69	1	2.01	0	150	1	76	0	347	0	1	0
1002	任万林	2018	2018-05-15	195130	69.5	41.7	27.8	1.5	#NULL!		#NULL!	STEMI	2020-10-16	三支	0	0	1	0	1	0	1	63	0	55	0	8.58	0	128	0	1	268	0	1.79	4.52	0	0.68	0	1.79	0	2.12	0	118.04	1	59.4	0	470	0	0	1
1003	殷秀英	2018	2018-05-15	195218	63.65	37.05	26.6	1.39286	#NULL!		#NULL!	STEMI	2020-10-12	三支	0	0	1	0	1	0	0	72	1	61	0	9.91	1	119	0	1	242	0	2.11	6.26	1	0.83	0	2.11	0	3.24	0	124	1	70.9	0	319.9	0	1	1
1004	刘春莲	2018	2018-05-16	195294	62.52	37.85	24.67	1.53425	#NULL!		#NULL!	STEMI	2020-10-12	三支	0	0	1	0	1	0	0	60	0	61	0	4.94	0	139	0	0	173	0	1.15	4.09	0	2.09	1	1.15	0	2.14	0	17	1	45.8	0	407.6	0	0	1
1009	刘汉生	2018	2018-05-19	195735	65	38.92	26.08	1.49233	#NULL!		#NULL!	STEMI	2020-10-13	双支，左前降、左回旋	0	1	0	0	1	0	1	73	1	36	1	12.54	1	155	0	0	184	0	1.79	3.92	0	0.72	0	1.79	0	1.63	0	835.94	1	111.53	1	389.2	0	0	0
1012	池江	2018	2018-05-23	196335	59.69	33.13	26.56	1.24736	#NULL!		#NULL!	STEMI	2020-10-14	双支，左前降、右冠	0	1	0	0	1	0	1	61	0	#NULL!	#NULL!	8.37	0	166	0	0	263	0	1.24	4.13	0	1.05	0	1.24	0	2.21	0	47.48	1	79.2	0	280.1	0	0	1
1017	何万成	2018	2018-05-23	196285	72.99	43.22	29.77	1.4518	#NULL!		#NULL!	STEMI	2020-10-14	三支	0	0	1	0	1	0	1	79	1	48	0	8.51	0	136	0	0	188	0	1.39	3.4	0	0.42	0	1.39	0	1.57	0	54.44	1	81.8	0	274.8	0	0	1
1018	胡玉旺	2018	2015-09-01	75073	67.9	37	30.9	1.19741	2018-05-24		#NULL!	STEMI	2020-10-14	双支，左前降、右冠	0	1	0	0	1	0	1	57	0	53	0	8.11	0	166	0	0	181	0	0.82	3.6	0	1.46	0	0.82	1	2.12	0	27	1	91.32	0	167.4	0	0	1
1019	徐大勇	2018	2018-05-24	196495	76.31	45.21	31.1	1.4537	2018-08-14	UA	#NULL!	STEMI	#NULL!	三支	0	0	1	0	1	0	1	38	0	49	0	9.7	1	151	0	0	222	0	1.5	5.78	1	6.8	1	1.5	0	2.74	0	100.43	1	73.25	0	434.3	0	1	0
1020	屈民	2018	2018-05-26	196704	67.67	40.87	26.8	1.525	#NULL!		#NULL!	STEMI	2020-10-14	双支，左回旋、右冠	0	1	0	0	1	0	1	54	0	56	0	6.84	0	146	0	0	245	0	0.89	3.81	0	5.03	1	0.89	1	1.83	0	3.79	0	69.56	0	257.4	0	1	1
1028	孙凤	2018	2018-06-02	197668	67.08	39.59	27.49	1.44016	#NULL!		#NULL!	STEMI	2020-10-14	三支	0	0	1	0	1	0	1	54	0	46	0	18.63	1	137	0	0	291	0	1.14	4.96	0	1.19	0	1.14	0	2.94	0	23.64	1	33.78	0	313.1	0	0	0
1030	王艳	2018	2018-06-02	197706	74.39	40.58	33.81	1.20024	#NULL!		#NULL!	STEMI	2020-10-14	三支	0	0	1	0	1	0	0	65	0	45	0	13	1	151	0	0	304	1	1.1	4.8	0	3.94	1	1.1	0	2.57	0	20.69	1	58.27	0	261.8	0	0	1
1031	郭金河	2018	2018-06-02	197719	75.53	42.97	32.56	1.31972	#NULL!		#NULL!	STEMI	2020-10-14	三支	0	0	1	0	1	0	1	53	0	46	0	8.42	0	126	0	1	152	0	1.24	3.82	0	0.73	0	1.24	0	1.99	0	217.09	1	64.1	0	223.8	0	0	0
1032	王小娟	2018	2018-06-04	198031	71.55	38.28	33.27	1.15059	#NULL!		#NULL!	STEMI	2020-10-14	双支，左前降、右冠	0	1	0	0	1	0	0	61	0	43	0	24.14	1	169	0	0	355	1	0.87	3.35	0	0.79	0	0.87	1	1.91	0	103.29	1	56.89	0	274.3	0	0	1
1034	马玉芝	2018	2018-06-05	198174	73.42	37.41	36.01	1.03888	#NULL!		#NULL!	STEMI	2020-10-14	单支，左前降	1	0	0	0	1	0	0	82	1	41	0	6.8	0	148	0	0	218	0	1.21	6.01	1	1.57	0	1.21	0	3.68	1	158.94	1	59	0	194	0	0	1
1039	王海涛	2018	2018-06-07	198508	59.69	30.3	29.39	1.03096	#NULL!		#NULL!	STEMI	2020-10-14	三支	0	0	1	0	1	0	1	38	0	63	0	12.13	1	140	0	0	277	0	1.17	4.65	0	5.93	1	1.17	0	2.19	0	181.46	1	92.68	0	487	0	1	1
1042	李冬霞	2018	2018-06-10	198796	73.14	40	33.14	1.207	#NULL!		#NULL!	STEMI	2020-10-12	单支，左前降	1	0	0	0	1	0	0	53	0	57	0	9.5	0	146	0	0	254	0	1.54	7.8	1	1.25	0	1.54	0	4.88	1	19	1	70.2	0	238	0	1	0
1046	张春英	2018	2018-06-09	198680	73.86	42.38	31.48	1.34625	#NULL!		#NULL!	STEMI	2020-10-14	三支	0	0	1	0	1	0	0	48	0	47	0	17.86	1	143	0	0	243	0	1.46	3.89	0	0.66	0	1.46	0	1.88	0	75.56	1	76.91	0	239.1	0	0	1
1050	殷秀英	2018	2018-05-15	195218	63.65	37.05	26.6	1.39286	#NULL!		#NULL!	STEMI	2020-10-12	三支	0	0	1	0	1	0	0	73	1	61	0	9.91	1	140	0	0	242	0	1.84	4.46	0	0.83	0	1.84	0	2.01	0	179	1	36	0	389.9	0	1	1
1052	程爱国	2018	2018-06-13	199312	71.8	42.23	29.57	1.42814	#NULL!		#NULL!	STEMI	2020-10-14	三支	0	0	1	0	1	0	1	43	0	41	0	10.12	1	159	0	0	154	0	1.33	6.35	1	1.74	1	1.33	0	3.84	1	394.32	1	89.87	0	490.4	0	1	1
1058	郑宝国	2018	2017-09-21	163806	60.6	38.1	22.5	1.69333	2018-06-12	UA	1	STEMI愈合期	#NULL!	多支，左主干、左前降、左回旋、右冠	0	0	1	0	1	0	1	58	0	64	0	7.44	0	130	0	0	125	0	0.91	2.5	0	0.47	0	0.91	1	1.1	0	#NULL!	#NULL!	50.1	0	429	0	0	0
1063	齐国恩	2018	2018-06-19	199991	74.04	40.3	33.74	1.19443	2018-08-24	陈旧性下壁、正后壁心梗	1	STEMI	#NULL!	三支	0	0	1	0	1	0	1	70	1	57	0	10.34	1	155	0	0	252	0	0.76	4.09	0	3.72	1	0.76	1	2.29	0	2.7	0	81.63	0	290	0	1	0
1073	麻沛荣	2018	2018-06-25	200861	66.6	39.3	27.3	1.43956	#NULL!		#NULL!	STEMI	2020-10-12	三支	0	0	1	0	1	0	0	72	1	57	0	8.42	0	154	0	0	195	0	0.95	6.27	1	3.44	1	0.95	1	3.91	1	53	1	79.82	0	212	0	0	1
1074	高文来	2018	2018-06-25	200958	73.16	40.67	32.49	1.25177	#NULL!		#NULL!	STEMI	2020-10-14	双支，左回旋、右冠	0	1	0	0	1	0	1	72	1	60	0	6.22	0	170	0	0	168	0	1.02	4.41	0	1.37	0	1.02	0	2.58	0	19.5	1	78.4	0	260.2	0	0	1
1078	郑学义	2018	2018-06-29	201415	68.96	40.56	28.4	1.42817	#NULL!		#NULL!	STEMI	2020-10-14	单支，右冠	1	0	0	0	1	0	1	59	0	59	0	6.68	0	135	0	0	172	0	1.51	5.14	0	0.63	0	1.51	0	2.84	0	154.28	1	88	0	342.3	0	0	1
1081	逯玉球	2018	2018-07-01	201572	69.84	39.55	30.29	1.30571	#NULL!		#NULL!	STEMI	2020-10-14	单支，左前降	1	0	0	0	1	0	1	54	0	43	0	17.14	1	153	0	0	228	0	#NULL!	#NULL!	0	#NULL!	0	#NULL!	1	#NULL!	0	#NULL!	#NULL!	62.98	0	340.7	0	0	0
1095	麻福俊	2018	2018-06-26	201037	68.62	35.21	33.41	1.05388	#NULL!		#NULL!	STEMI	2020-10-14	三支	0	0	1	0	1	0	1	84	1	47	0	13.43	1	145	0	0	153	0	0.93	4.53	0	1.12	0	0.93	1	2.77	0	43.77	1	47.2	0	379	0	0	1
1097	刘强	2018	2018-07-12	203207	63.7	35.9	27.8	1.29137	#NULL!		#NULL!	STEMI	2020-10-14	双支，左回旋、右冠	0	1	0	0	1	0	1	55	0	43	0	10.57	1	136	0	0	279	0	1.1	4.82	0	1.01	0	1.1	0	2.88	0	266.72	1	64	0	382.8	0	0	1
1099	刘井雨	2018	2018-07-12	203277	57.59	33.23	24.36	1.36412	#NULL!		#NULL!	STEMI	2020-10-14	单支，右冠	1	0	0	0	1	0	1	63	0	45	0	10.7	1	145	0	0	173	0	1.18	3.33	0	0.44	0	1.18	0	1.68	0	239.16	1	58.84	0	291.4	0	0	0
1100	杨国玉	2018	2018-07-14	203502	79.21	41.41	37.8	1.0955	#NULL!		#NULL!	STEMI	2020-10-14	双支，左前降、右冠	0	1	0	0	1	0	1	47	0	60	0	9.97	1	156	0	0	149	0	0.94	4.56	0	2.99	1	0.94	1	2.6	0	79.39	1	78.88	0	368.4	0	1	0
1101	刘海明	2018	2018-07-14	203499	62.71	37.73	24.98	1.51041	2018-08-13	UA	#NULL!	STEMI	#NULL!	三支	0	0	1	0	1	0	1	60	0	48	0	7.6	0	135	0	0	142	0	1.04	4.14	0	0.86	0	1.04	0	2.39	0	69.48	1	74.61	0	396.8	0	0	1
1102	范宝成	2018	2018-07-15	203508	65.8	37.17	28.63	1.29829	#NULL!		#NULL!	STEMI	2020-10-14	双支，左前降、左回旋	0	1	0	0	1	0	1	62	0	46	0	9.56	1	156	0	0	235	0	1.29	4.16	0	0.67	0	1.29	0	2.23	0	359.97	1	68.94	0	350.6	0	0	1
1104	张宝山	2018	2018-07-16	203569	61.91	37.34	24.57	1.51974	#NULL!		#NULL!	STEMI	2020-10-14	双支，左前降、左回旋	0	1	0	0	1	0	1	46	0	52	0	7.01	0	178	0	0	230	1	1.14	4.16	0	1.27	0	1.14	0	2.29	0	129.98	1	70.7	0	481.4	0	0	0
1105	张国柱	2018	2018-07-17	203979	63.86	37.59	26.27	1.43091	2019-05-01	UA	#NULL!	STEMI	#NULL!	双支，左回旋、右冠	0	1	0	0	1	0	1	54	0	59	0	6.55	0	133	0	0	177	0	1.11	3.96	0	1.8	1	1.11	0	2.1	0	17.02	1	75.19	0	292.3	0	1	1
1106	张海灜	2018	2018-07-18	204131	68.07	38.53	29.54	1.30433	#NULL!		#NULL!	STEMI	2020-10-14	双支，左前降、右冠	0	1	0	0	1	0	1	60	0	60	0	9.81	1	146	0	0	211	0	0.92	4.33	0	0.91	0	0.92	1	2.64	0	39.15	1	79.39	0	358.6	0	0	1
1108	王海	2018	2018-07-18	204166	64.78	38.42	26.36	1.45751	#NULL!		#NULL!	STEMI	2020-10-14	三支	0	0	1	0	1	0	1	66	1	36	1	13.2	1	157	0	0	2	0	1.21	4.17	0	0.63	0	1.21	0	2.31	0	544.06	1	58.44	0	259.1	0	0	0
1109	孙国利	2018	2018-07-18	204204	69.98	39.33	30.65	1.2832	#NULL!		#NULL!	STEMI	2020-10-14	双支，左回旋、右冠	0	1	0	0	1	0	1	45	0	64	0	11.37	1	157	0	0	290	1	1.08	4.37	0	0.81	0	1.08	0	2.55	0	109.39	1	60.98	0	340.1	0	0	0
1110	李存	2018	2018-07-18	204221	69.45	41.13	28.32	1.45233	#NULL!		#NULL!	STEMI	2020-10-14	单支，左前降	1	0	0	0	1	0	1	49	0	42	0	14.96	1	135	0	0	326	0	1	4.62	0	2.49	1	1	0	2.65	0	391.45	1	48	0	251	0	1	0
1114	王小娟	2018	2018-06-04	198031	71.55	38.28	33.27	1.15059	#NULL!		#NULL!	STEMI	2020-10-14	双支，左前降、右冠	0	1	0	0	1	0	0	61	0	43	0	24.14	1	126	0	1	355	1	1.23	8.41	1	1.48	0	1.23	0	5.6	1	90.17	1	#NULL!	#NULL!	117	0	0	1
1118	胡国青	2018	2018-07-20	204459	62.33	33.31	29.02	1.14783	2018-08-27	UA	1	STEMI	#NULL!	三支	0	0	1	0	1	0	1	58	0	41	0	20.39	1	140	0	0	233	0	0.93	3.68	0	1.38	0	0.93	1	2.06	0	44.26	1	73.49	0	377.1	0	0	1
1124	刘淑珍	2018	2018-07-26	205368	78.2	41.7	36.5	1.14247	#NULL!		#NULL!	STEMI	2020-10-14	单支，左前降	1	0	0	0	1	0	0	60	0	46	0	9.98	1	131	0	0	221	0	0.98	5.85	1	4.58	1	0.98	1	3.44	1	15.73	0	49.6	0	440	0	1	1
1126	孙宝贵	2018	2018-07-28	130	76.4	40.9	35.5	1.15211	2019-03-04	UA	#NULL!	STEMI	#NULL!	三支	0	0	1	0	1	0	1	74	1	43	0	9.92	1	91	1	1	268	0	1.36	3.61	0	1.19	0	1.36	0	1.68	0	41.01	1	50.63	0	378.7	0	0	1
1127	孙秀兰	2018	2018-07-30	205690	75.01	37.88	37.13	1.0202	#NULL!		#NULL!	STEMI	2020-10-14	三支	0	0	1	0	1	0	0	76	1	54	0	18.69	1	128	0	1	477	1	1.24	2.65	0	0.38	0	1.24	0	1.09	0	20.37	1	67.12	0	223.6	0	0	1
1129	吴慧新	2018	2018-07-22	175064	81.72	42.59	39.13	1.08842	#NULL!		#NULL!	STEMI	2020-10-13	单支，左前降	1	0	0	0	1	0	0	68	1	55	0	9.85	1	163	0	0	268	0	1.19	4.47	0	1.61	0	1.19	0	2.46	0	9	0	61	0	322.8	0	1	1
1135	刘月娥	2018	2018-07-28	205596	73.92	40.95	32.97	1.24204	#NULL!		#NULL!	STEMI	2020-10-14	三支	0	0	1	0	1	0	0	63	0	45	0	8.46	0	136	0	0	366	1	1.17	4.07	0	1.44	0	1.17	0	2.18	0	13.05	0	49.7	0	234.2	0	1	1
1142	曹桂林	2018	2018-08-04	206598	76.64	40.55	36.09	1.12358	#NULL!		#NULL!	STEMI	2020-10-14	三支	0	0	1	0	1	0	1	64	0	60	0	14.46	1	155	0	0	253	0	1.08	4.67	0	1.89	1	1.08	0	2.68	0	76.52	1	54	0	343.1	0	1	1
1143	仉翠平	2018	2018-08-05	206678	64.17	35.23	28.94	1.21735	#NULL!		#NULL!	STEMI	2020-10-13	三支	0	0	1	0	1	0	0	52	0	59	0	7.79	0	138	0	0	239	0	1.57	8	1	3.39	1	1.57	0	4.81	1	6	0	82	0	225	0	1	1
1145	刘淑荣	2018	2018-08-06	207012	72.56	41.68	30.88	1.34974	#NULL!		#NULL!	STEMI	2020-10-15	三支	0	0	1	0	1	0	0	58	0	39	1	7.45	0	150	0	0	162	0	0.8	3.61	0	1.56	0	0.8	1	2.09	0	18.05	1	71.66	0	339.6	0	0	1
1148	张彦君	2018	2018-08-07	207190	77.59	47.63	29.96	1.58979	#NULL!		#NULL!	STEMI	2020-10-14	双支，左前降、右冠	0	1	0	0	1	0	1	58	0	48	0	12.61	1	177	0	0	290	1	1.32	4.36	0	1.71	1	1.32	0	2.26	0	17.83	1	57.44	0	271.3	0	1	0
1151	丁军	2018	2018-08-09	207478	67.38	41.07	26.31	1.561	#NULL!		#NULL!	STEMI	2020-10-14	单支，左前降	1	0	0	0	1	0	1	56	0	35	1	1.11	0	157	0	0	182	0	1.12	4.12	0	3.37	1	1.12	0	2.06	0	45.04	1	78	0	638.7	1	1	0
1153	刘秀云	2018	2018-08-09	207342	77.98	44.64	33.34	1.33893	#NULL!		#NULL!	STEMI	2020-10-13	三支	0	0	1	0	1	0	0	70	1	59	0	12.27	1	146	0	0	275	0	1.32	5.68	1	1.76	1	1.32	0	3.31	0	73.37	1	74.74	0	211.6	0	1	1
1155	马宝民	2018	2018-08-11	207654	64.19	40.73	23.46	1.73615	#NULL!		#NULL!	STEMI	2020-10-14	双支，左前降、右冠	0	1	0	0	1	0	1	63	0	53	0	6.79	0	110	0	1	154	0	1.06	5.2	1	2.67	1	1.06	0	3.05	0	129.93	1	47	0	328.6	0	1	0
1156	郭秀兰	2018	2018-08-11	207685	64.66	37.96	26.7	1.42172	#NULL!		#NULL!	STEMI	2020-10-15	双支，左回旋、右冠	0	1	0	0	1	0	0	78	1	48	0	11.48	1	135	0	0	225	0	1.12	4.26	0	2.21	1	1.12	0	2.29	0	19.04	1	67.59	0	219	0	0	0
1157	崔国立	2018	2018-08-13	208030	68.82	42.82	26	1.64692	#NULL!		#NULL!	STEMI	2020-10-14	双支，左前降、左回旋	0	1	0	0	1	0	1	40	0	41	0	16.46	1	168	0	0	316	0	0.81	4.49	0	0.49	0	0.81	1	2.9	0	579.1	1	78	0	249.4	0	1	0
1159	崔书英	2018	2018-08-15	208315	86	44.67	41.33	1.08081	2018-05-03	陈旧性心梗、HF	#NULL!	STEMI	#NULL!	双支，左前降、右冠	0	1	0	0	1	0	0	62	0	60	0	9.89	1	146	0	0	286	0	1.97	6.55	1	0.74	0	1.97	0	3.59	1	748.66	1	63.67	0	261.7	0	1	1
1164	陈桂云	2018	2018-08-18	208710	54.04	29.41	24.63	1.19407	#NULL!		#NULL!	STEMI	2020-10-15	三支	0	0	1	0	1	0	0	62	0	46	0	13.31	1	165	0	0	196	0	1.32	4.96	0	2.35	1	1.32	0	2.68	0	49.58	1	99.16	0	272.1	0	0	1
1165	张文臣	2018	2018-08-20	209036	75.19	44.36	30.83	1.43886	#NULL!		#NULL!	STEMI	2020-10-14	双支，左前降、左回旋	0	1	0	0	1	0	1	54	0	41	0	8.11	0	121	0	1	233	0	1.32	4.66	0	1.01	0	1.32	0	2.57	0	581.97	1	54	0	378.4	0	0	0
1166	乔本兰	2018	2018-08-21	209040	74.91	36.8	38.11	0.965626	#NULL!		#NULL!	STEMI	2020-10-15	单支，左前降	1	0	0	0	1	0	0	83	1	46	0	7.44	0	114	0	1	146	0	1.49	3.81	0	2.11	1	1.49	0	1.65	0	15.83	0	45.9	0	80	0	1	1
1170	崔御	2018	2018-08-21	209109	74.43	41.39	33.04	1.25272	#NULL!		#NULL!	STEMI	2020-10-14	三支	0	0	1	0	1	0	1	66	1	59	0	6.33	0	156	0	0	199	0	0.7	3.86	0	2.07	1	0.7	1	2.32	0	14.09	0	72.01	0	316.8	0	1	1
1173	宁玉莲	2018	2018-08-24	209584	65.18	36.59	28.59	1.27982	2019-03-26	UA	#NULL!	STEMI	#NULL!	单支，左前降	1	0	0	0	1	0	0	45	0	65	0	14.17	1	154	0	0	297	0	0.88	4.08	0	4.09	1	0.88	1	2.15	0	10	0	91.62	0	364.6	0	0	1
1174	范国瑞	2018	2018-08-25	209697	75.89	41.86	34.03	1.23009	#NULL!		#NULL!	STEMI	2020-10-14	双支，左回旋、右冠	0	1	0	0	1	0	1	59	0	38	1	12.31	1	110	0	1	177	0	0.79	4.12	0	0.97	0	0.79	1	2.57	0	154.48	1	44	0	435.4	0	1	0
1175	张凤英	2018	2018-08-26	209724	69.17	38.24	30.93	1.23634	#NULL!		#NULL!	STEMI	2020-10-15	双支，左前降、右冠	0	1	0	0	1	0	0	65	0	48	0	13.44	1	156	0	0	319	0	0.98	2.26	0	0.82	0	0.98	1	0.94	0	15.89	0	61.87	0	336	0	0	1
1176	张福运	2018	2018-08-26	209752	66.35	38.31	28.04	1.36626	#NULL!		#NULL!	STEMI	2020-10-16	双支，左回旋、右冠	0	1	0	0	1	0	1	53	0	57	0	10.17	1	144	0	0	178	0	0.89	4.07	0	0.79	0	0.89	1	2.47	0	37.44	1	71.51	0	379.8	0	0	0
1178	西国海	2018	2018-08-28	210044	69.45	39.95	29.5	1.35424	2019-01-02	UA	#NULL!	STEMI	#NULL!	三支	0	0	1	0	1	0	1	51	0	59	0	7.32	0	160	0	0	175	0	0.66	5.28	1	2.66	1	0.66	1	3.43	1	78.96	1	58.76	0	349.8	0	1	0
1183	徐亚维	2018	2018-08-27	23047	66.51	35.81	30.7	1.16645	#NULL!		#NULL!	STEMI	2020-10-14	单支，左前降	1	0	0	0	1	0	1	60	0	43	0	7.9	0	162	0	0	179	0	0.37	2.76	0	2.78	1	0.37	1	1.63	0	28.51	1	74.62	0	370	0	1	0
1187	付家信	2018	2018-09-01	210644	79.13	43.23	35.9	1.20418	2019-02-15	陈旧性心梗、CABG术后、心衰	#NULL!	STEMI	#NULL!	双支，左前降、右冠	0	1	0	0	1	0	1	77	1	45	0	10.63	1	160	0	0	205	1	0.96	4.41	0	1.71	1	0.96	1	2.59	0	41.73	1	69.79	0	287.7	0	1	1
1189	王利民	2018	2018-09-03	210764	71.8	42.8	29	1.47586	#NULL!		#NULL!	STEMI	2020-10-14	双支，左前降、右冠	0	1	0	0	1	0	1	56	0	41	0	8.94	0	143	0	0	177	0	1.29	4.7	0	0.43	0	1.29	0	2.69	0	209.56	1	66.36	0	203	0	0	1
1190	翁思源	2018	2018-09-03	210904	66.97	37.41	29.56	1.26556	#NULL!		#NULL!	STEMI	2020-10-14	双支，左前降、右冠	0	1	0	0	1	0	1	65	0	47	0	17.32	1	164	0	0	177	0	0.74	4.23	0	3.32	1	0.74	1	2.46	0	135.38	1	47.81	0	364.3	0	1	1
1191	郭金树	2018	2018-09-03	211013	70.84	41.29	29.55	1.39729	#NULL!		#NULL!	STEMI	2020-10-18	单支，左前降	1	0	0	0	1	0	1	63	0	56	0	13.26	1	136	0	0	149	0	0.84	4.62	0	0.88	0	0.84	1	2.94	0	392.4	1	65	0	262.2	0	0	0
1192	李兰英	2018	2018-09-04	211203	62.8	35.87	26.93	1.33197	#NULL!		#NULL!	STEMI	2020-10-15	单支，左前降	1	0	0	0	1	0	0	45	0	49	0	15.58	1	153	0	0	325	0	1.21	4.85	0	1.27	0	1.21	0	2.79	0	12.17	0	57.67	0	382	0	0	1
1194	潘静迎	2018	2018-09-06	128129	79.33	45.84	33.49	1.36877	#NULL!		#NULL!	STEMI	2020-10-14	双支，左前降、左回旋	0	1	0	0	1	0	1	47	0	45	0	6.98	0	146	0	0	252	0	0.71	4.49	0	2.35	1	0.71	1	2.79	0	16.79	1	62.23	0	418.4	0	1	1
1201	蔡国武	2018	2018-09-09	193634	60.11	34.11	26	1.31192	#NULL!		#NULL!	STEMI	2020-10-14	三支	0	0	1	0	1	0	1	58	0	44	0	5.41	0	150	0	0	153	0	1.43	4.28	0	0.64	0	1.43	0	2.22	0	122.44	1	65.5	0	312.2	0	0	0
1202	崔金凤	2018	2018-09-10	211961	75.3	40.8	34.5	1.18261	#NULL!		#NULL!	STEMI	2020-10-15	三支	0	0	1	0	1	0	0	37	0	42	0	9.32	0	154	0	0	325	0	0.95	8.33	1	10.07	1	0.95	1	4.9	1	19.76	1	56.14	0	400.06	0	1	1
1203	任铁立	2018	2018-09-11	212079	73.44	44.23	29.21	1.51421	#NULL!		#NULL!	STEMI	2020-10-14	单支，右冠	1	0	0	0	1	0	1	50	0	62	0	11.16	1	133	0	0	296	0	0.9	2.28	0	0.62	0	0.9	1	1.04	0	26.85	1	152	1	355.7	0	0	1
1206	姚宝军	2018	2018-09-13	212379	71.1	42.1	29	1.45172	#NULL!		#NULL!	STEMI	2020-10-14	三支	0	0	1	0	1	0	1	52	0	46	0	18.07	1	136	0	0	309	1	0.86	3.8	0	1.56	0	0.86	1	2.2	0	25.5	1	55.5	0	463	0	0	0
1210	高永军	2018	2018-09-10	211854	90	45	45	1	#NULL!		#NULL!	STEMI	2020-10-14	三支	0	0	1	0	1	0	1	46	0	47	0	5.61	0	164	0	0	241	0	1.06	5.73	1	2.71	1	1.06	0	2.99	0	22	1	53.96	0	330	0	1	1
1211	何士良	2018	2018-09-13	212329	69.69	41.94	27.75	1.51135	#NULL!		#NULL!	STEMI	2020-10-14	双支，左前降、左回旋	0	1	0	0	1	0	1	53	0	48	0	10.49	1	138	0	0	225	0	1.21	4.59	0	0.75	0	1.21	0	2.63	0	103.51	1	50.11	0	249.6	0	0	0
1212	曹庆发	2018	2018-09-15	212658	58.37	35.53	22.84	1.5556	#NULL!		#NULL!	STEMI	2020-10-14	单支，左前降	1	0	0	0	1	0	1	71	1	48	0	8.87	0	154	0	0	236	0	1.18	3.58	0	0.29	0	1.18	0	1.89	0	26.98	1	83.52	0	271.6	0	0	0
1213	熊立军	2018	2018-09-15	212601	68.17	37.51	30.66	1.22342	2019-05-14	UA	#NULL!	STEMI	#NULL!	三支	0	0	1	0	1	0	1	57	0	52	0	21.61	1	151	0	0	209	1	0.84	4.58	0	0.51	0	0.84	1	2.94	0	88.65	1	69	0	363.7	0	0	0
1215	杜景明	2018	2018-09-18	213090	76.12	43.88	32.24	1.36104	#NULL!		#NULL!	STEMI	2020-10-15	双支，左前降、右冠	0	1	0	0	1	0	1	55	0	47	0	10.71	1	135	0	0	223	0	0.92	4.32	0	1.51	0	0.92	1	2.57	0	30.88	1	48.24	0	352.8	0	0	1
1219	杨柏林	2018	2018-09-21	213402	72.66	43.57	29.09	1.49777	#NULL!		#NULL!	STEMI	2020-10-15	双支，左前降、右冠	0	1	0	0	1	0	1	54	0	57	0	10.89	1	142	0	0	221	0	1	4.33	0	1.03	0	1	0	2.56	0	111.7	1	66.11	0	371.3	0	0	1
1220	张贺文	2018	2018-09-21	213398	62.17	36.26	25.91	1.39946	#NULL!		#NULL!	STEMI	2020-10-15	单支，左回旋	1	0	0	0	1	0	1	53	0	62	0	9.6	1	138	0	0	209	1	1.12	4.17	0	2.16	1	1.12	0	2.22	0	20.77	1	50.69	0	522	1	1	0
1223	张希化	2018	2018-09-21	48028	60.34	33.68	26.66	1.26332	#NULL!		#NULL!	STEMI	2020-10-16	三支	0	0	1	0	1	0	1	75	1	43	0	11.79	1	154	0	0	198	0	0.95	3.85	0	0.84	0	0.95	1	2.24	0	94.56	1	66.89	0	377.8	0	0	1
1226	卢军虎	2018	2018-09-26	213966	78.18	47.43	30.75	1.54244	#NULL!		#NULL!	STEMI	2020-10-15	单支，左前降	1	0	0	0	1	0	1	55	0	55	0	4.87	0	166	0	0	188	0	0.93	4.36	0	1.29	0	0.93	1	2.62	0	19.71	1	66.98	0	231.6	0	0	0
1230	徐学付	2018	2018-09-27	214119	66.83	35.92	30.91	1.16208	#NULL!		#NULL!	STEMI	2020-10-15	单支，左前降	1	0	0	0	1	0	1	55	0	48	0	12.37	1	136	0	0	260	1	1.02	4.03	0	1.42	0	1.02	0	2.27	0	59.96	1	39.59	0	313.4	0	0	1
1232	张云朋	2018	2018-09-26	213911	78.5	43.1	35.4	1.21751	#NULL!		#NULL!	STEMI	2020-10-15	三支	0	0	1	0	1	0	1	63	0	58	0	8.2	0	155	0	0	245	0	1.03	4.87	0	1.7	1	1.03	0	2.9	0	19.64	1	69.82	0	493	0	0	1
1233	谷守全	2018	2018-09-27	214156	82.67	47.78	34.89	1.36945	#NULL!		#NULL!	STEMI	2020-10-15	双支，左前降、左回旋	0	1	0	0	1	0	1	70	1	42	0	10.53	1	136	0	0	182	0	0.86	4.81	0	5.93	1	0.86	1	2.57	0	18.41	1	92.29	0	453.3	0	1	1
1235	李清	2018	2018-09-29	214286	65.95	36.87	29.08	1.26788	#NULL!		#NULL!	STEMI	2020-10-15	双支，左前降、右冠	0	1	0	0	1	0	1	53	0	57	0	14.92	1	176	0	0	255	0	1.13	6.51	1	2.18	1	1.13	0	4.09	1	226.32	1	64.87	0	302.6	0	1	0
1240	闫德宇	2018	2018-10-03	214673	59.87	31.8	28.07	1.13288	#NULL!		#NULL!	STEMI	2020-10-15	双支，左回旋、右冠	0	1	0	0	1	0	1	65	0	#NULL!	#NULL!	8.98	0	173	0	0	25	0	1.07	3.37	0	0.42	0	1.07	0	1.8	0	131.88	1	80.6	0	397.6	0	0	1
1241	舒志强	2018	2018-10-05	214799	85.65	50.72	34.93	1.45205	#NULL!		#NULL!	STEMI	2020-10-15	三支	0	0	1	0	1	0	1	46	0	56	0	7.6	0	148	0	0	279	0	1.04	6.26	1	3.48	1	1.04	0	3.83	1	24.36	1	72.6	0	439.21	0	1	0
1243	王桂侠	2018	2018-10-06	214882	70.64	41.28	29.36	1.40599	#NULL!		#NULL!	STEMI	2020-10-13	单支，左前降	1	0	0	0	1	0	0	59	0	60	0	12.14	1	169	0	0	279	0	1.21	4.61	0	0.49	0	1.21	0	2.67	0	104.12	1	62.6	0	222.2	0	1	1
1244	孙志强	2018	2018-10-07	214964	76.54	44.79	31.75	1.41071	#NULL!		#NULL!	STEMI	2020-10-15	双支，左回旋、右冠	0	1	0	0	1	0	1	34	0	#NULL!	#NULL!	14.36	1	124	0	1	21	0	0.75	4.93	0	2.15	1	0.75	1	3.13	0	557	1	60.7	0	400.79	0	1	1
1245	张凤文	2018	2018-10-07	214998	65.28	37.47	27.81	1.34736	#NULL!		#NULL!	STEMI	2020-10-15	双支，左前降、左回旋	0	1	0	0	1	0	1	70	1	56	0	8.15	0	145	0	0	167	0	1.41	3.04	0	0.4	0	1.41	0	1.26	0	269.33	1	84.8	0	208.1	0	0	0
1246	彭安山	2018	2018-10-10	215766	62.11	36.8	25.31	1.45397	#NULL!		#NULL!	STEMI	2020-10-16	双支，右冠、左回旋	0	1	0	0	1	0	1	62	0	46	0	16.85	1	169	0	0	256	0	0.48	1.29	0	0.52	0	0.48	1	0.6	0	86.4	1	64.9	0	120.15	0	0	0
1249	于广海	2018	2018-10-01	214520	66.56	37.32	29.24	1.27633	2018-12-21	UA	1	STEMI	#NULL!	双支，左前降、左回旋	0	1	0	0	1	0	1	63	0	46	0	7.68	0	148	0	0	183	0	0.84	3.6	0	0.73	0	0.84	1	2.14	0	15.4	0	72.8	0	368.79	0	0	1
1250	刘海轩	2018	2018-09-26	214034	70.71	43.48	27.23	1.59677	#NULL!		#NULL!	STEMI	2020-10-15	单支，右冠	1	0	0	0	1	0	1	43	0	56	0	13.62	1	129	0	1	255	0	0.97	5.14	0	1.81	1	0.97	1	3.16	0	155.15	1	55.93	0	341.5	0	1	0
1251	傅桂芝	2018	2018-10-10	215622	66.1	38.66	27.44	1.40889	#NULL!		#NULL!	STEMI	2020-10-13	三支	0	0	1	0	1	0	0	81	1	55	0	8.23	0	170	0	0	284	0	1.64	5.08	0	0.87	0	1.64	0	2.67	0	20.27	1	67.9	0	347.2	0	1	0
1252	高岳岭	2018	2018-10-13	216059	70.4	40.41	29.99	1.34745	#NULL!		#NULL!	STEMI	2020-10-15	双支，左回旋、左前降	0	1	0	0	1	0	1	36	0	53	0	14.64	1	119	0	1	187	0	0.96	5.29	1	0.56	0	0.96	1	3.41	1	278.74	1	59.6	0	346.36	0	1	1
1254	周永平	2018	2018-10-14	216113	73.98	43.8	30.18	1.45129	#NULL!		#NULL!	STEMI	2020-10-15	单支，左前降	1	0	0	0	1	0	1	63	0	48	0	6.68	0	121	0	1	173	0	1.07	5.95	1	2.65	1	1.07	0	3.64	1	25.61	1	54	0	366.19	0	1	1
1255	吴秀珍	2018	2018-10-16	216530	73.14	39.13	34.01	1.15054	#NULL!		#NULL!	STEMI	2020-10-15	三支	0	0	1	0	1	0	0	81	1	45	0	10.51	1	139	0	0	207	1	1.28	4.94	0	1.82	1	1.28	0	2.6	0	#NULL!	#NULL!	60.7	0	289	0	1	1
1257	朱瑞金	2018	2018-10-08	215372	73.79	39.89	33.9	1.1767	2018-11-06	陈旧性心梗	1	STEMI	#NULL!	单支，右冠	1	0	0	0	1	0	0	50	0	42	0	7.55	0	153	0	0	309	1	1.15	5.3	1	1.11	0	1.15	0	3.21	0	36.55	1	66.2	0	367.56	0	1	1
1259	路建强	2018	2018-10-19	217010	81.15	47.49	33.66	1.41087	#NULL!		#NULL!	STEMI	2020-10-15	双支，右冠、左回旋	0	1	0	0	1	0	1	43	0	56	0	9.16	0	156	0	0	218	0	0.86	5.67	1	2.01	1	0.86	1	3.65	1	18.27	1	63.5	0	443.58	0	1	1
1260	肖方	2018	2018-10-20	217072	82.42	44.58	37.84	1.17812	2018-11-14	陈旧性心梗	1	STEMI	#NULL!	三支	0	0	1	0	1	0	1	49	0	47	0	9.39	0	141	0	0	321	0	0.9	5.64	1	2.5	1	0.9	1	3.54	1	24.08	1	74.9	0	202.22	0	1	1
1261	宁学忠	2018	2018-10-22	62573	64.73	38.64	26.09	1.48103	#NULL!		#NULL!	STEMI	2020-10-15	双支，左回旋、左前降	0	1	0	0	1	0	1	58	0	45	0	11.46	1	156	0	0	228	0	0.83	5.25	1	2.49	1	0.83	1	3.29	0	12.96	0	63.2	0	331	0	1	0
1270	尤凤荣	2018	2018-10-25	217852	77.1	39.8	37.3	1.06702	#NULL!		#NULL!	STEMI	2020-10-15	单支，右冠	1	0	0	0	1	0	0	64	0	47	0	12.95	1	169	0	0	246	0	1.25	6.59	1	2.83	1	1.25	0	3.28	0	4.77	0	76.5	0	231	0	0	0
1271	李文中	2018	2018-10-26	217992	74.49	45.7	28.79	1.58736	#NULL!		#NULL!	STEMI	2020-10-15	双支，左前降、右冠	0	1	0	0	1	0	1	53	0	58	0	12.81	1	137	0	0	153	0	0.68	3.87	0	4.2	1	0.68	1	2.13	0	53.44	1	61	0	301.92	0	1	1
1273	韩春生	2018	2018-10-31	218698	67.85	36.56	31.29	1.16842	#NULL!		#NULL!	STEMI	2020-10-15	单支，左前降	1	0	0	0	1	0	1	69	1	44	0	7.4	0	164	0	0	289	0	1.19	3.86	0	0.75	0	1.19	0	2.06	0	844.03	1	77	0	304.57	0	0	1
1283	刘臣仓	2018	2018-11-05	219126	64.25	36.3	27.95	1.29875	#NULL!		#NULL!	STEMI	2020-10-15	单支，右冠	1	0	0	0	1	0	1	67	1	59	0	6.92	0	178	0	0	201	1	1.28	4.61	0	0.31	0	1.28	0	2.63	0	114.77	1	101.3	0	357.41	0	0	0
1291	靳刚	2018	2018-11-11	220030	73.5	42.11	31.39	1.34151	2018-12-05	STEMI下壁愈合期	1	STEMI	#NULL!	三支	0	0	1	0	1	0	1	60	0	59	0	7.96	0	155	0	0	212	0	0.82	5.22	1	1.94	1	0.82	1	3.33	0	23.78	1	76.6	0	296.82	0	1	1
1294	王鹏飞	2018	2018-11-12	220366	82.28	49.4	32.88	1.50243	#NULL!		#NULL!	STEMI	2020-10-15	单支，左回旋	1	0	0	0	1	0	1	71	1	59	0	10.52	1	143	0	0	268	0	0.81	6.53	1	1.53	0	0.81	1	4.42	1	15.46	0	81.9	0	320.55	0	1	1
1295	陆生	2018	2018-11-13	80534	80.54	43.3	37.24	1.16273	2018-12-03	UA	#NULL!	STEMI	#NULL!	双支，左前降、右冠	0	1	0	0	1	0	1	81	1	48	0	10.21	1	127	0	1	231	0	1.19	5.57	1	1.3	0	1.19	0	3.37	0	19.08	1	65.4	0	351.88	0	1	1
1303	郝长青	2018	2018-11-17	221103	70.73	42.12	28.61	1.47221	#NULL!		#NULL!	STEMI	2020-10-15	双支，左回旋、右冠	0	1	0	0	1	0	1	64	0	48	0	16.52	1	121	0	1	199	0	0.85	2.65	0	0.38	0	0.85	1	1.4	0	335.22	1	58.95	0	260.21	0	0	0
1305	孙卫军	2018	2018-11-18	221141	68.7	42.26	26.44	1.59834	#NULL!		#NULL!	STEMI	2020-10-15	单支，左前降	1	0	0	0	1	0	1	42	0	49	0	10.59	1	128	0	1	219	0	1.11	4.94	0	2.09	1	1.11	0	2.86	0	12.59	0	83.7	0	293.27	0	1	0
1306	董成	2018	2018-11-20	221585	71.38	40.1	31.28	1.28197	#NULL!		#NULL!	STEMI	2020-10-15	三支	0	0	1	0	1	0	1	67	1	58	0	10.37	1	150	0	0	231	0	1.34	5.59	1	1.36	0	1.34	0	3.26	0	99.91	1	68.2	0	297.96	0	1	0
1308	苗贺廷	2018	2018-11-14	220660	69.14	37.28	31.86	1.17012	#NULL!		#NULL!	STEMI	2020-10-19	双支，左前降、左回旋	0	1	0	0	1	0	1	75	1	47	0	5.85	0	154	0	0	206	1	1.16	3.78	0	1.82	1	1.16	0	1.91	0	8.59	0	58	0	265.42	0	1	1
1309	王海彬	2018	2018-11-13	220553	73.52	36.16	37.36	0.96788	#NULL!		#NULL!	STEMI	2020-10-15	三支	0	0	1	0	1	0	1	69	1	64	0	4.69	0	157	0	0	93	0	1.33	3.37	0	0.63	0	1.33	0	1.57	0	115.13	1	72.82	0	266.39	0	0	1
1317	潘海军	2018	2018-11-25	222108	69.75	43.27	26.48	1.63406	#NULL!		#NULL!	STEMI	2020-10-15	双支，左前降、左回旋	0	1	0	0	1	0	1	45	0	41	0	11.72	1	156	0	0	251	0	1.36	6.15	1	3.4	1	1.36	0	3.49	1	593.8	1	108	0	452.89	0	1	0
1319	王克清	2018	2018-11-26	222153	73.01	45.33	27.68	1.63764	#NULL!		#NULL!	STEMI	2020-10-16	三支	0	0	1	0	1	0	1	56	0	39	1	6.39	0	145	0	0	21	0	1.4	4.3	0	1.29	0	1.4	0	2.19	0	467.83	1	56.1	0	266.91	0	0	1
1320	姜国福	2018	2018-11-28	222750	82.23	42.77	39.46	1.08388	#NULL!		#NULL!	STEMI	2020-10-15	双支，左前降、右冠	0	1	0	0	1	0	1	47	0	55	0	10.12	1	133	0	0	392	1	0.82	5.07	0	1.72	1	0.82	1	3.23	0	172.13	1	53.78	0	333.48	0	1	1
1327	孙振才	2018	2018-11-29	222865	67.17	41.93	25.24	1.66125	#NULL!		#NULL!	STEMI	2020-10-15	三支	0	0	1	0	1	0	1	63	0	61	0	9.5	0	161	0	0	207	0	0.76	3.94	0	3.59	1	0.76	1	2.19	0	134.77	1	59.2	0	347.51	0	1	0
1329	马春生	2018	2015-11-02	80839	64.9	40.4	24.5	1.64898	2018-11-28	UA	1	STEMI	2020-10-15	三支	0	0	1	0	1	0	1	52	0	64	0	10.54	1	167	0	0	236	0	0.66	5.82	1	1.26	0	0.66	1	3.49	1	15	0	63.9	0	263.3	0	1	0
1330	苗连金	2018	2018-12-01	223077	66.92	39.95	26.97	1.48128	#NULL!		#NULL!	STEMI	2020-10-15	双支，左前降、右冠	0	1	0	0	1	0	1	59	0	54	0	10.47	1	117	0	1	275	0	1.81	5.75	1	0.51	0	1.81	0	3.1	0	231.84	1	47.78	0	238.23	0	1	0
1331	刘桂兰	2018	2018-11-30	215434	84.79	47.78	37.01	1.291	#NULL!		#NULL!	STEMI	2020-10-13	三支	0	0	1	0	1	0	0	53	0	62	0	6.36	0	143	0	0	164	0	0.56	4.73	0	0.96	0	0.56	1	3.24	0	51.21	1	71.7	0	162.2	0	0	1
1332	崔凤满	2018	2018-12-02	223148	68.45	38.85	29.6	1.3125	#NULL!		#NULL!	STEMI	2020-10-15	单支，左前降	1	0	0	0	1	0	1	67	1	41	0	11.35	1	126	0	1	215	0	1.14	4.07	0	0.44	0	1.14	0	2.3	0	70.07	1	64.5	0	151.6	0	0	0
1333	孔秀兰	2018	2018-12-02	223172	64.47	37.69	26.78	1.40739	#NULL!		#NULL!	STEMI	2020-10-15	三支	0	0	1	0	1	0	0	62	0	42	0	11.41	1	172	0	0	253	0	1.01	4.06	0	1.97	1	1.01	0	2.24	0	55.23	1	67.2	0	297.84	0	1	0
1334	张连生	2018	2018-12-02	223120	68.35	40.47	27.88	1.45158	#NULL!		#NULL!	STEMI	2020-10-15	双支，左前降、左回旋	0	1	0	0	1	0	1	44	0	44	0	7.32	0	144	0	0	179	0	0.77	4.03	0	1.49	0	0.77	1	2.46	0	289.22	1	77.7	0	333.88	0	1	0
1336	陈立发	2018	2018-12-03	223186	58.52	36.34	22.18	1.63841	#NULL!		#NULL!	STEMI	2020-10-15	单支，右冠	1	0	0	0	1	0	1	56	0	62	0	11.18	1	136	0	0	196	0	1.54	4.24	0	0.58	0	1.54	0	2.1	0	270.4	1	65.08	0	538.2	1	0	1
1337	李振华	2018	2018-12-03	223383	73.73	42.43	31.3	1.35559	#NULL!		#NULL!	STEMI	2020-10-13	单支，左前降	1	0	0	0	1	0	0	59	0	56	0	10.79	1	155	0	0	202	0	1.43	4.82	0	1.75	1	1.43	0	2.54	0	9.39	0	81	0	261.6	0	0	0
1339	商桂梁	2018	2018-12-06	223838	71.79	43.65	28.14	1.55117	#NULL!		#NULL!	STEMI	2020-10-15	单支，右冠	1	0	0	0	1	0	1	44	0	55	0	13.79	1	177	0	0	297	0	1.06	6.27	1	2.51	1	1.06	0	3.92	1	348	1	63.8	0	423.75	0	1	1
1342	王洪全	2018	2018-12-07	223982	63.45	36.34	27.11	1.34046	#NULL!		#NULL!	STEMI	2020-10-15	三支	0	0	1	0	1	0	1	55	0	42	0	10.84	1	145	0	0	210	0	1.54	4.04	0	0.46	0	1.54	0	1.95	0	342.22	1	60	0	392.79	0	0	1
1346	逯玉芬	2018	2018-12-07	224030	75.61	45.01	30.6	1.47092	#NULL!		#NULL!	STEMI	2020-10-13	双支，左前降、右冠	0	1	0	0	1	0	0	58	0	55	0	10.18	1	165	0	0	179	0	1.25	3.67	0	0.77	0	1.25	0	1.86	0	11.92	0	62.4	0	256	0	0	1
1347	刘信国	2018	2018-12-08	224116	73.92	43.76	30.16	1.45093	#NULL!		#NULL!	STEMI	2020-10-15	单支，左回旋	1	0	0	0	1	0	1	54	0	54	0	11.27	1	146	0	0	220	0	1.05	4.23	0	1.79	1	1.05	0	2.37	0	331.71	1	73.6	0	251.14	0	1	1
1348	姜海军	2018	2018-12-11	224512	74.76	44.55	30.21	1.47468	2018-12-25	消化道出血	#NULL!	STEMI	2020-10-15	三支	0	0	1	0	1	0	1	43	0	45	0	7.55	0	136	0	0	206	0	1.97	5.4	1	0.73	0	1.97	0	2.67	0	540.93	1	37.5	0	403.56	0	1	0
1349	孙树枝	2018	2018-12-11	140230	60.22	31.81	28.41	1.11968	#NULL!		#NULL!	STEMI	2020-10-16	三支	0	0	1	0	1	0	0	65	0	37	1	16.43	1	148	0	0	42	0	1.16	5.95	1	1.56	0	1.16	0	3.68	1	29.05	1	75	0	350.54	0	1	0
1350	安福德	2018	2018-12-12	224745	67.4	41.2	26.2	1.57252	#NULL!		#NULL!	STEMI	2020-10-15	三支	0	0	1	0	1	0	1	60	0	43	0	8.99	0	145	0	0	185	0	1.37	5.21	1	0.8	0	1.37	0	2.99	0	312.2	1	70	0	269	0	1	0
1353	汪利国	2018	2018-12-02	223153	80.4	47.18	33.22	1.42023	#NULL!		#NULL!	STEMI	2020-10-15	单支，左回旋	1	0	0	0	1	0	1	53	0	48	0	12.41	1	134	0	0	239	0	0.95	6.78	1	3.02	1	0.95	1	4.36	1	187.89	1	43.08	0	307.75	0	1	1
1355	李军	2018	2018-12-05	223737	82.09	49.33	32.76	1.5058	#NULL!		#NULL!	STEMI	2020-10-15	三支	0	0	1	0	1	0	1	36	0	58	0	7.33	0	161	0	0	321	0	0.81	3.09	0	1.68	0	0.81	1	1.66	0	21.19	1	67.9	0	541.37	1	1	0
1356	郑伟	2018	2018-12-15	225176	79.78	47.57	32.21	1.47687	#NULL!		#NULL!	STEMI	2020-10-15	三支	0	0	1	0	1	0	1	51	0	57	0	12.11	1	150	0	0	184	0	1.37	5.01	0	1.7	1	1.37	0	2.74	0	261.16	1	74	0	363.79	0	0	1
1357	陈厶达	2018	2018-12-15	225182	78.84	44.98	33.86	1.32841	#NULL!		#NULL!	STEMI	2020-10-15	单支，左前降	1	0	0	0	1	0	1	37	0	45	0	10.48	1	150	0	0	320	0	1.33	5.95	1	4.87	1	1.33	0	3.21	0	239.85	1	96.8	0	483.73	0	1	1
1358	刘仕合	2018	2018-12-16	225198	68.6	42.91	25.69	1.6703	2019-02-12	HF IV	#NULL!	STEMI	#NULL!	三支	0	0	1	0	1	0	1	56	0	32	1	7.8	0	159	0	0	242	0	0.93	6.58	1	4.2	1	0.93	1	4.1	1	17.46	1	117.6	1	495.48	0	1	0
1359	张国林	2018	2018-12-16	225215	66.11	42.46	23.65	1.79535	#NULL!		#NULL!	STEMI	2020-10-15	双支，左回旋、右冠	0	1	0	0	1	0	1	44	0	66	0	11.61	1	159	0	0	218	0	0.9	3.82	0	2.01	1	0.9	1	2.14	0	11.9	0	95.9	0	554.65	1	1	1
1360	王振东	2018	2018-12-17	225251	75.9	45.9	30	1.53	#NULL!		#NULL!	STEMI	2020-10-15	双支，左前降、右冠	0	1	0	0	1	0	1	53	0	62	0	6.79	0	133	0	0	176	0	1.04	5.83	1	3.12	1	1.04	0	3.52	1	37.41	1	64.68	0	310.86	0	1	1
1362	张国林	2018	2018-12-16	225215	66.11	42.46	23.65	1.79535	#NULL!		#NULL!	STEMI	2020-10-15	双支，左回旋、右冠	0	1	0	0	1	0	1	72	1	66	0	11.61	1	137	0	0	218	0	0.9	3.82	0	2.01	1	0.9	1	2.14	0	11.9	0	57.4	0	554.65	1	1	1
1367	乔立强	2018	2014-08-08	34849	74	49.4	24.6	2.00813	2018-12-19	UA	1	STEMI	#NULL!	单支，右冠	1	0	0	0	1	0	1	35	0	#NULL!	#NULL!	12.3	1	150	0	0	195	0	0.71	4.72	0	1.89	1	0.71	1	3.15	0	9	0	70.8	0	524.6	1	1	1
1368	白东升	2018	2018-12-21	226055	70.58	43.88	26.7	1.64345	#NULL!		#NULL!	STEMI	2020-10-15	单支，右冠	1	0	0	0	1	0	1	55	0	61	0	5.83	0	142	0	0	178	0	0.97	5.73	1	1.9	1	0.97	1	3.62	1	10.1	0	64.7	0	281.16	0	1	0
1370	付德金	2018	2018-12-27	226867	71.65	42.57	29.08	1.46389	#NULL!		#NULL!	STEMI	2020-10-15	单支，左前降	1	0	0	0	1	0	1	54	0	53	0	6.31	0	158	0	0	309	0	1.61	4.25	0	0.38	0	1.61	0	2.07	0	23.1	1	58	0	236.55	0	0	0
1379	王树发	2018	2018-12-30	227265	67.28	41.44	25.84	1.60372	#NULL!		#NULL!	STEMI	2020-10-16	三支	0	0	1	0	1	0	1	59	0	58	0	9.22	0	142	0	0	239	0	1.14	4.69	0	0.57	0	1.14	0	2.78	0	105.05	1	67.5	0	259.56	0	0	1
1380	庞汉阁	2018	2018-12-31	227322	67.74	41.9	25.84	1.62152	#NULL!		#NULL!	STEMI	2020-10-16	三支	0	0	1	0	1	0	1	54	0	56	0	8.47	0	#NULL!	#NULL!	#NULL!	205	0	1.03	5.09	0	0.97	0	1.03	0	3.15	0	87.12	1	#NULL!	#NULL!	478.32	0	0	1
4	全淑娟	2016	2016-01-04	920	73.7	44.3	29.4	1.5068	#NULL!		#NULL!	UA	2020-10-09	左前降支	1	0	0	1	0	0	0	69	1	64	0	6.13	0	141	0	0	246	0	1.16	5.64	1	1.45	0	1.16	0	3.82	1	#NULL!	#NULL!	63.26	0	230.3	0	1	1
7	葛先	2016	2016-01-04	87138	64.3	43	21.3	2.01878	#NULL!		#NULL!	UA	2020-10-09	左前降支	1	0	0	1	0	0	1	55	0	64	0	9.82	1	156	0	0	174	0	1.02	3.93	0	1.29	0	1.02	0	2.11	0	8	0	88	0	457	0	0	0
8	王云峰	2016	2015-12-30	86724	82.4	42.9	39.5	1.08608	#NULL!		#NULL!	UA	2020-10-09	左回旋支	1	0	0	1	0	0	1	60	0	65	0	8.85	0	161	0	0	289	0	0.76	5.51	1	3.47	1	0.76	1	3.17	0	10	0	81	0	444.7	0	1	1
11	李春合	2016	2016-01-06	87428	75.1	42.3	32.8	1.28963	#NULL!		#NULL!	UA	2020-10-09	左前降支	1	0	0	1	0	0	1	47	0	56	0	5.25	0	165	0	0	158	0	1.08	4.88	0	1.44	0	1.08	0	3.15	0	10	0	57.7	0	323.8	0	0	1
13	王军	2016	2016-01-11	88014	77.2	45.9	31.3	1.46645	2017-03-20	UA	#NULL!	UA	#NULL!	左前降支、左回旋支、右冠	0	0	1	1	0	0	1	55	0	51	0	10.53	1	136	0	0	208	0	0.88	5.35	1	5.93	1	0.88	1	1.77	0	7	0	89	0	348.4	0	1	1
14	杨翠	2016	2016-01-06	61953	63.8	37.5	26.3	1.42586	2017-12-26	UA	#NULL!	UA	#NULL!	左前降支	1	0	0	1	0	0	1	73	1	66	0	5.35	0	146	0	0	135	0	0.73	3.17	0	1.47	0	0.73	1	1.44	0	#NULL!	#NULL!	67.01	0	328.5	0	1	1
18	朱仕芬	2016	2106-01-17	88987	70.8	41.3	29.5	1.4	#NULL!		#NULL!	UA	2020-10-09	左前降支、右冠状动脉	0	1	0	1	0	0	0	54	0	63	0	4.95	0	130	0	0	250	0	1.18	4.15	0	1.47	0	1.18	0	2.3	0	10	0	66.5	0	233.1	0	1	1
19	王玉玲	2016	2016-01-20	88492	77.3	43.3	34	1.27353	2016-01-30	UA	1	UA	#NULL!	左前降支	1	0	0	1	0	0	0	58	0	57	0	9.62	1	137	0	0	299	0	1.36	3.91	0	1.91	1	1.36	0	1.68	0	5	0	66.5	0	195	0	0	1
20	赵云来	2016	2016-01-16	88517	58.5	34.2	24.3	1.40741	#NULL!		#NULL!	UA	2020-10-09	左前降支、左回旋支	0	1	0	1	0	0	1	56	0	74	0	4.32	0	138	0	0	169	0	0.9	4.08	0	1.74	1	0.9	1	2.39	0	#NULL!	#NULL!	79.1	0	301	0	1	1
22	兰继华	2016	2014-08-26	36778	71.5	41.3	30.2	1.36755	2016-01-26	UA	1	UA	#NULL!	右冠	1	0	0	1	0	0	1	60	0	70	0	5.51	1	137	0	0	203	0	0.66	3.93	0	4.6	1	0.66	1	1.18	0	14	0	83.1	0	539.2	1	1	0
23	盖士合	2016	2016-01-25	89454	69.1	41.9	27.2	1.54044	#NULL!		#NULL!	UA	2020-10-09	左回旋支、左前降支	0	1	0	1	0	0	1	60	0	54	0	5.7	0	160	0	0	298	0	1.46	4.08	0	1.26	0	1.46	0	2.05	0	20	1	66.8	0	346.6	0	0	1
25	陈宝增	2016	2016-01-28	89764	62.3	36.3	26	1.39615	#NULL!		#NULL!	UA	2020-10-09	左前降支	1	0	0	1	0	0	1	48	0	60	0	5.59	0	141	0	0	228	0	0.83	3.63	0	0.6	0	0.83	1	2.53	0	12	0	72.3	0	338.1	0	0	0
26	杨国瑞	2016	2016-01-21	89122	77.5	43.8	33.7	1.2997	#NULL!		#NULL!	UA	2020-10-16	左前降支、左回旋支、右冠	0	0	1	1	0	0	1	52	0	56	0	7.82	0	173	0	0	188	0	0.81	3.45	0	1.47	0	0.81	1	1.97	0	#NULL!	#NULL!	91.6	0	290.1	0	1	0
27	齐德云	2016	2016-01-26	89575	69.4	42.2	27.2	1.55147	#NULL!		#NULL!	UA	2020-10-09	左前降支	1	0	0	1	0	0	1	44	0	64	0	5.39	0	135	0	0	176	0	1.26	4.01	0	1.29	0	1.26	0	2.16	0	7	0	65.6	0	239.7	0	0	1
33	朱桂英	2016	2016-01-20	90636	73.6	43.7	29.9	1.46154	2016-01-30	UA	1	UA	#NULL!	单支，左前降	1	0	0	1	0	0	0	53	0	64	0	6.44	0	132	0	0	152	0	1.36	3.91	0	1.91	1	1.36	0	1.68	0	5	0	66.5	0	195	0	0	0
35	崔玉芬	2016	2016-02-14	82816	67.6	39.6	28	1.41429	#NULL!		#NULL!	UA	2020-10-09	双支，左前降、右冠	0	1	0	1	0	0	0	65	0	58	0	3.85	0	113	0	1	209	0	1.46	3.64	0	1.75	1	1.46	0	1.38	0	13	0	52.7	0	237.5	0	1	1
36	郭进芝	2016	2016-02-14	90763	81.4	51.3	30.1	1.70432	#NULL!		#NULL!	UA	2020-10-15	三支	0	0	1	1	0	0	0	64	0	#NULL!	#NULL!	7.29	#NULL!	161	0	0	33	0	0.8	4.3	0	3.83	1	0.8	1	2.41	0	13.34	0	50.5	0	239.76	0	1	1
37	李月英	2016	2016-02-10	90834	71.8	39.8	32	1.24375	2018-05-09	UA	#NULL!	UA	#NULL!	双支，左回旋、右冠	0	1	0	1	0	0	0	73	1	63	0	6.91	0	141	0	0	223	0	1.05	2.62	0	1.94	1	1.05	0	0.69	0	13	0	68.92	0	392.8	0	0	1
38	徐庆云	2016	2016-02-05	89933	67.8	37.8	30	1.26	#NULL!		#NULL!	UA	2020-10-16	单支，左前降	1	0	0	1	0	0	0	53	0	53	0	6.81	0	138	0	0	244	0	1.01	3.66	0	2.3	1	1.01	0	1.89	0	6.9	0	61.6	0	343.6	0	0	0
40	李新国	2016	2016-02-13	90580	80.1	44.7	35.4	1.26271	#NULL!		#NULL!	UA	2020-10-09	双支，左前降、右冠	0	1	0	1	0	0	1	58	0	58	0	9.25	0	155	0	0	171	0	1.16	5.98	1	4.75	1	1.16	0	2.66	0	16	0	87.7	0	333.6	0	1	1
41	高玉海	2016	2016-02-14	90738	77.4	46.8	30.6	1.52941	#NULL!		#NULL!	UA	2020-10-09	单支，左前降	1	0	0	1	0	0	1	58	0	77	0	9.2	0	155	0	0	231	0	1.16	3.9	0	0.95	0	1.16	0	2.31	0	15	0	70.9	0	439.4	0	0	1
42	韩凤远	2016	2016-02-15	90922	69.9	41.7	28.2	1.47872	#NULL!		#NULL!	UA	2020-10-09	三支	0	0	1	1	0	0	1	53	0	67	0	6.4	0	140	0	0	205	0	1.04	3.72	0	1.01	0	1.04	0	2.22	0	8	0	74.7	0	432.7	0	0	1
43	杨淑敏	2016	2016-02-02	90093	65.1	40.1	25	1.604	#NULL!		#NULL!	ACS	2020-10-13	三支	0	0	1	1	0	0	0	61	0	52	0	6.6	0	141	0	0	243	0	0.89	3.86	0	0.6	0	0.89	1	2.32	0	31.74	1	57.36	0	324.8	0	1	1
44	张孝	2016	2016-02-14	90726	66.3	38.9	27.4	1.41971	#NULL!		#NULL!	UA	2020-10-09	三支	0	0	1	1	0	0	1	60	0	46	0	8.13	0	152	0	0	180	0	0.74	3.24	0	0.99	0	0.74	1	1.73	0	#NULL!	#NULL!	72.9	0	273.4	0	1	1
47	赵凤荣	2016	2016-02-14	90740	68.7	37.2	31.5	1.18095	#NULL!		#NULL!	UA	2020-10-09	双支，左前降、右冠	0	1	0	1	0	0	0	73	1	69	0	5.76	0	142	0	0	278	0	1.1	5.49	1	0.78	0	1.1	0	3.13	0	#NULL!	#NULL!	81.8	0	210	0	1	1
49	尹桂芹	2016	2016-02-21	91810	69	41.7	27.3	1.52747	2016-02-29	UA	1	UA	#NULL!	双支，左前降、右冠	0	1	0	1	0	0	0	57	0	61	0	9.85	1	163	0	0	279	0	1.3	3.39	0	1.16	0	1.3	0	1.56	0	16	0	74.3	0	339.5	0	1	1
52	孙淑杰	2016	2016-02-17	91348	71.9	39.3	32.6	1.20552	2016-05-25	SAP	0	UA	2020-10-09	三支	0	0	1	1	0	0	0	60	0	65	0	5.58	0	127	0	1	244	0	1	3.19	0	0.78	0	1	0	1.84	0	9	0	58	0	309.1	0	1	0
53	王振海	2016	2016-02-22	91923	70.1	42.3	27.8	1.52158	#NULL!		#NULL!	UA	2020-10-09	单支，左前降	1	0	0	1	0	0	1	49	0	53	0	9.8	1	160	0	0	229	0	0.75	3.16	0	1.96	1	0.75	1	1.52	0	10	0	71.3	0	360.7	0	1	1
57	刘桂英	2016	2016-02-18	91542	70.9	38.1	32.8	1.16159	2018-01-17		#NULL!	UA	2020-10-09	单支，左前降	1	0	0	1	0	0	0	57	0	65	0	6.19	0	128	0	1	181	0	0.97	6.7	1	1.6	0	0.97	1	4.09	1	#NULL!	#NULL!	59.4	0	274.1	0	1	1
58	李库	2016	2016-03-01	93002	71.3	42.7	28.6	1.49301	#NULL!		#NULL!	UA	2020-10-09	单支，左前降	1	0	0	1	0	0	1	57	0	#NULL!	#NULL!	7.75	0	139	0	0	161	0	1.12	2.72	0	0.57	0	1.12	0	1.34	0	12	0	79.3	0	270	0	0	0
60	张军	2016	2016-02-26	92592	71.2	43.5	27.7	1.5704	#NULL!		#NULL!	UA	2020-10-09	三支	0	0	1	1	0	0	1	56	0	55	0	6.81	0	155	0	0	222	0	1.13	4.73	0	1.84	1	1.13	0	2.76	0	7	0	89.3	0	320.4	0	1	1
63	段强	2016	2016-02-26	92512	76.1	47.8	28.3	1.68905	#NULL!		#NULL!	UA	2020-10-09	三支	0	0	1	1	0	0	1	60	0	62	0	7.37	0	150	0	0	283	0	0.93	3.77	0	1.8	1	0.93	1	2.02	0	10	0	77.1	0	439.9	0	1	1
65	唐柏春	2016	2016-03-07	93663	65.1	39.9	25.2	1.58333	#NULL!		#NULL!	UA	2020-10-09	三支	0	0	1	1	0	0	1	63	0	57	0	7.32	0	145	0	0	306	0	0.95	4.21	0	1.37	0	0.95	1	2.22	0	#NULL!	#NULL!	79.4	0	200.7	0	0	0
74	徐忠来	2016	2016-03-10	94225	74.4	44.8	29.6	1.51351	#NULL!		#NULL!	UA	2020-10-09	三支，左前降、左回旋、右冠	0	0	1	1	0	0	1	58	0	56	0	10.1	1	149	0	0	178	0	1.19	3.92	0	1.11	0	1.19	0	2.23	0	16	0	80.2	0	356.4	0	0	1
75	宁素娥	2016	2016-01-27	56141	65.1	38.4	26.7	1.4382	#NULL!		#NULL!	UA	2020-10-13	双支，左前降、左回旋	0	1	0	1	0	0	0	62	0	50	0	10.2	1	126	0	1	241	0	1.43	3.44	0	0.44	0	1.43	0	1.56	0	69	1	45.76	0	162.6	0	1	1
79	梁桂芹	2016	2016-02-14	94903	80.6	41.5	39.1	1.06138	2016-06-20	UA	#NULL!	UA	#NULL!	双支，左前降、右冠	0	1	0	1	0	0	0	58	0	74	0	5.66	0	139	0	0	354	1	1.18	4.34	0	1.92	1	1.18	0	2.29	0	8	0	51.9	0	174.6	0	1	1
80	李文绪	2016	2016-03-14	94651	59.7	33.5	26.2	1.27863	#NULL!		#NULL!	UA	2020-10-09	三支，左前降、左回旋、右冠	0	0	1	1	0	0	1	65	0	62	0	6.42	0	126	0	1	168	0	0.8	2.76	0	0.55	0	0.8	1	1.71	0	#NULL!	#NULL!	65.2	0	247.6	0	1	1
81	崔万同	2016	2016-03-14	94608	87.3	46.2	41.1	1.12409	2018-07-23	UA	#NULL!	UA	#NULL!	单支，左前降	1	0	0	1	0	0	1	52	0	#NULL!	#NULL!	8.44	0	159	0	0	264	0	1.23	3.91	0	1.06	0	1.23	0	2.2	0	19	1	71.7	0	327.4	0	0	1
82	李振江	2016	2016-03-11	94296	69.5	40.5	29	1.39655	#NULL!		#NULL!	UA	2020-10-09	双支，左前降、左回旋	0	1	0	1	0	0	1	54	0	#NULL!	#NULL!	4.9	0	159	0	0	218	0	1.13	4.49	0	1.7	1	1.13	0	2.59	0	5	0	80	0	308	0	0	1
84	杨国强	2016	2016-03-14	94504	80.1	44.5	35.6	1.25	#NULL!		#NULL!	SAP	2020-10-09	单支，左前降	1	0	0	1	0	0	1	53	0	38	1	8.7	0	155	0	0	169	0	1.03	6.28	1	5.93	1	1.03	0	2.55	0	5	0	83.2	0	507.9	0	1	1
88	任福海	2016	2015-10-13	8190	65.2	41.7	23.5	1.77447	2016-03-15	不稳定型心绞痛	1	UA	#NULL!	单支，左前降	1	0	0	1	0	0	1	46	0	68	0	8.55	0	159	0	0	228	0	0.78	4	0	2.01	1	0.78	1	1.96	0	#NULL!	#NULL!	63.4	0	416.1	0	1	1
89	曲忠义	2016	2016-03-15	94748	69.8	38.6	31.2	1.23718	#NULL!		#NULL!	UA	2020-10-09	单支，左回旋	1	0	0	1	0	0	1	58	0	#NULL!	#NULL!	5.37	0	154	0	0	194	0	0.73	3.53	0	2.2	1	0.73	1	1.8	0	9	0	81.9	0	347.9	0	1	1
90	李兰珍	2016	2016-03-21	57435	65.5	38.4	27.1	1.41697	2016-05-25	UA	#NULL!	UA	#NULL!	双支，左前降、右冠	0	1	0	1	0	0	0	64	0	64	0	7.37	0	146	0	0	238	0	0.57	3.14	0	1.98	1	0.57	1	1.48	0	#NULL!	#NULL!	62.6	0	294.2	0	1	1
91	张志民	2016	2016-03-21	95500	75	45.1	29.9	1.50836	#NULL!		#NULL!	SAP	2020-10-09	三支	0	0	1	1	0	0	1	46	0	64	0	6.91	0	148	0	0	198	0	1.06	3.18	0	0.67	0	1.06	0	1.82	0	15	0	81.21	0	331.3	0	0	0
92	宋淑敏	2016	2016-03-18	95232	75.4	40.7	34.7	1.17291	#NULL!		#NULL!	UA	2020-10-15	单支，左回旋支	1	0	0	1	0	0	0	59	0	#NULL!	#NULL!	4.61	0	135	0	0	291	0	1.52	6.09	1	1.38	0	1.52	0	3.52	1	13.34	0	68.4	0	252.24	0	1	1
93	李宗泽	2016	2016-03-22	95714	62.6	38.9	23.7	1.64135	#NULL!		#NULL!	UA	2020-10-09	单支，左前降	1	0	0	1	0	0	1	76	1	#NULL!	#NULL!	5.59	0	154	0	0	181	0	0.9	3.86	0	0.73	0	0.9	1	2.24	0	#NULL!	#NULL!	87.4	0	195.3	0	0	0
95	袁兴学	2016	2016-03-28	96247	63	38.7	24.3	1.59259	#NULL!		#NULL!	UA	2020-10-09	双支，左前降、右冠	0	1	0	1	0	0	1	68	1	57	0	7.38	0	139	0	0	300	0	1.13	5.6	1	0.94	0	1.13	0	3.42	1	#NULL!	#NULL!	64.33	0	249.1	0	1	0
96	杨学良	2016	2016-03-27	96205	75.1	41	34.1	1.20235	2019-03-08	UA	#NULL!	UA	#NULL!	单支，右冠	1	0	0	1	0	0	1	66	1	65	0	4.76	0	121	0	1	156	0	1.11	3.04	0	1.89	1	1.11	0	1.07	0	38	1	115.7	1	350	0	1	1
97	周培萱	2016	2016-03-25	96105	77	48.4	28.6	1.69231	2017-03-28	UA	#NULL!	UA	#NULL!	三支	0	0	1	1	0	0	1	48	0	59	0	9.95	1	153	0	0	261	0	1.46	5.06	0	0.86	0	1.46	0	3.21	0	#NULL!	#NULL!	69	0	294	0	0	0
99	赵素贤	2016	2016-03-21	95588	70.2	41.2	29	1.42069	#NULL!		#NULL!	UA	2020-10-19	单支	1	0	0	1	0	0	0	65	0	60	0	7.4	0	133	0	0	366	1	0.91	3.78	0	3.06	1	0.91	1	1.48	0	7	0	60.86	0	303.3	0	0	0
101	闫志林	2016	2016-03-28	78937	61.7	36.3	25.4	1.42913	2018-11-26	UA	1	UA	#NULL!	单支	1	0	0	1	0	0	1	53	0	57	0	7.18	0	123	0	1	211	0	1.02	3.25	0	1.63	0	1.02	0	1.49	0	13	0	75.6	0	291.7	0	0	0
103	魏桂霞	2016	2016-03-23	95853	80.4	41.1	39.3	1.0458	#NULL!		#NULL!	UA	2020-10-19	单支，左回旋	1	0	0	1	0	0	0	73	1	69	0	7.39	0	147	0	0	167	0	1.05	4.53	0	1.77	1	1.05	0	2.68	0	11	0	46.5	0	189.4	0	1	1
112	孔宪云	2016	2016-03-10	94228	65.3	42.4	22.9	1.85153	#NULL!		#NULL!	UA	2020-10-09	双支，左前降、左回旋	0	1	0	1	0	0	0	66	1	60	0	5.92	0	156	0	0	227	0	1.05	4.46	0	1.33	0	1.05	0	2.81	0	36	1	5.77	0	323.5	0	1	1
114	杨玉兴	2016	2016-04-13	98290	79.4	45	34.4	1.30814	#NULL!		#NULL!	UA	2020-10-09	双支，左前降、右冠	0	1	0	1	0	0	1	53	0	56	0	7.12	0	129	0	1	208	0	1.27	4.15	0	1.14	0	1.27	0	2.36	0	8	0	85.9	0	346.2	0	0	1
115	孙飞	2016	2016-04-12	98160	72.1	43.2	28.9	1.49481	#NULL!		#NULL!	UA	2020-10-09	单支，左回旋	1	0	0	1	0	0	1	28	0	61	0	9.3	0	163	0	0	330	0	0.86	5.68	1	8.1	1	0.86	1	1.14	0	12	0	66.4	0	443.8	0	1	1
118	李德喜	2016	2016-04-14	98438	61.8	35.2	26.6	1.32331	#NULL!		#NULL!	UA	2020-10-09	双支，左前降、左回旋	0	1	0	1	0	0	1	58	0	69	0	12.47	1	153	0	0	231	0	0.56	2.94	0	2.56	1	0.56	1	1.22	0	17	1	70.6	0	316.1	0	1	1
119	吴殿森	2016	2016-04-19	53933	77	44.1	32.9	1.34043	#NULL!		#NULL!	UA	2020-10-09	三支	0	0	1	1	0	0	1	62	0	59	0	6.24	0	161	0	0	198	0	1.25	4.62	0	1.74	1	1.25	0	2.58	0	16	0	53.2	0	233.8	0	1	0
123	张文辉	2016	2016-04-26	99829	71.5	41.1	30.4	1.35197	#NULL!		#NULL!	UA	2020-10-09	单支，左前降	1	0	0	1	0	0	1	57	0	59	0	6.37	0	129	0	1	297	0	1.08	4.9	0	2.54	1	1.08	0	2.67	0	#NULL!	#NULL!	70.5	0	474.4	0	1	1
126	魏淑云	2016	2016-04-25	99670	73.1	37.7	35.4	1.06497	#NULL!		#NULL!	UA	2020-10-09	三支	0	0	1	1	0	0	0	70	1	59	0	5.96	0	119	0	1	220	0	0.84	7.5	1	2	1	0.84	1	5.75	1	11	0	85.4	0	227.6	0	1	1
128	昶建华	2016	2016-04-18	98795	70.6	42.2	28.4	1.48592	#NULL!		#NULL!	UA	2020-10-09	三支	0	0	1	1	0	0	1	61	0	#NULL!	#NULL!	8.45	0	132	0	0	26	0	0.81	3.26	0	2.48	1	0.81	1	1.32	0	11	0	110.2	1	441.8	0	1	1
129	王维海	2016	2016-04-27	12211	74.8	42.5	32.3	1.31579	2016-04-27	UA	1	UA	#NULL!	三支	0	0	1	1	0	0	1	60	0	57	0	5.73	0	149	0	0	165	0	0.82	3.45	0	2.53	1	0.82	1	1.48	0	12	0	70.21	0	306.5	0	1	1
130	周明俊	2016	2016-04-26	99876	64.1	37.1	27	1.37407	#NULL!		#NULL!	UA	2020-10-09	双支，左前降支第一对角质、左回旋支	0	1	0	1	0	0	0	69	1	57	0	7.2	0	131	0	0	311	0	1.34	3.21	0	2.51	1	1.34	0	0.73	0	18	1	59.2	0	223.9	0	0	1
131	沈桂芹	2016	2016-03-21	99697	69.9	38.4	31.5	1.21905	#NULL!		#NULL!	UA	2020-10-09	三支	0	0	1	1	0	0	0	60	0	55	0	7.33	0	127	0	1	173	0	0.71	3.34	0	1.29	0	0.71	1	1.64	0	#NULL!	#NULL!	69	0	250	0	1	1
133	刘永勤	2016	2016-04-25	99728	68.8	37.1	31.7	1.17035	2017-09-27	UA	#NULL!	UA	#NULL!	单支，右冠	1	0	0	1	0	0	1	71	1	69	0	5.69	0	171	0	0	189	0	0.81	4.5	0	2.8	1	0.81	1	2.42	0	18	1	66.8	0	366.1	0	1	1
138	马振和	2016	2016-04-29	100248	75.5	42.2	33.3	1.26727	#NULL!		#NULL!	UA	2020-10-09	单支，左前降	1	0	0	1	0	0	1	65	0	63	0	7.14	0	160	0	0	232	0	1.41	4.18	0	0.7	0	1.41	0	2.45	0	13	0	89	0	303.8	0	0	0
143	李桂华	2016	2016-05-09	101164	79.1	47.6	31.5	1.51111	#NULL!		#NULL!	UA	2020-10-09	单支，左前降	1	0	0	1	0	0	1	51	0	71	0	8.68	0	170	0	0	229	0	1.01	4.57	0	2.05	1	1.01	0	2.63	0	17	1	54.84	0	421.2	0	1	0
150	田铁夫	2016	2016-05-07	101094	72.5	39.7	32.8	1.21037	#NULL!		#NULL!	UA	2020-10-09	三支	0	0	1	1	0	0	1	68	1	55	0	5.24	0	147	0	0	179	0	0.95	4.33	0	2.26	1	0.95	1	2.35	0	9	0	67.9	0	269.2	0	1	0
151	丁宏	2016	2016-05-16	102048	66.7	39.4	27.3	1.44322	#NULL!		#NULL!	UA	2020-10-09	双支，左回旋、右冠	0	1	0	1	0	0	1	58	0	71	0	5.49	0	146	0	0	207	0	0.78	4.91	0	3.01	1	0.78	1	2.76	0	11	0	77.2	0	298.5	0	1	1
154	王学明	2016	2016-05-13	101857	58.9	34.2	24.7	1.38462	#NULL!		#NULL!	UA	2020-10-09	三支	0	0	1	1	0	0	1	56	0	58	0	5.17	0	144	0	0	154	0	0.9	2.93	0	0.89	0	0.9	1	1.63	0	#NULL!	#NULL!	74.5	0	278.8	0	0	0
159	孙秀喜	2016	2016-05-24	103157	64.7	37.2	27.5	1.35273	#NULL!		#NULL!	UA	2020-10-09	双支，左前降、右冠	0	1	0	1	0	0	1	63	0	56	0	6.29	0	160	0	0	227	0	1.04	3.22	0	1.35	0	1.04	0	1.57	0	#NULL!	#NULL!	69.4	0	288.4	0	0	1
161	柳铁成	2016	2016-05-19	7918	61.5	39.5	22	1.79545	#NULL!		#NULL!	UA	2020-10-09	三支	0	0	1	1	0	0	1	50	0	54	0	10.52	1	149	0	0	205	0	0.91	4.74	0	2.66	1	0.91	1	3.12	0	26	1	77.8	0	358	0	1	1
162	王利国	2016	2016-05-09	101243	83.6	46.1	37.5	1.22933	#NULL!		#NULL!	UA	2020-10-09	单支，左前降	1	0	0	1	0	0	1	57	0	#NULL!	#NULL!	6.21	0	171	0	0	153	0	1.17	5.15	0	2.32	1	1.17	0	2.93	0	3	0	71.52	0	412.4	0	1	0
163	张怀起	2016	2016-05-12	101793	74.5	41.2	33.3	1.23724	#NULL!		#NULL!	UA	2020-10-09	三支	0	0	1	1	0	0	1	70	1	63	0	5.77	0	172	0	0	279	0	1.33	4.73	0	2.01	1	1.33	0	3.05	0	15.7	0	81.37	0	670	1	1	1
164	吕清	2016	2016-05-20	102753	75	47.7	27.3	1.74725	#NULL!		#NULL!	UA	2020-10-09	三支	0	0	1	1	0	0	1	62	0	66	0	8.75	0	164	0	0	274	0	1.11	6.03	1	0.94	0	1.11	0	4.18	1	#NULL!	#NULL!	72.5	0	410	0	1	0
169	艾则林	2016	2016-05-30	103895	64.7	40.9	23.8	1.71849	#NULL!		#NULL!	UA	2020-10-09	双支，左前降、左回旋	0	1	0	1	0	0	1	66	1	63	0	6.29	0	144	0	0	177	0	1.26	5.15	0	1.92	1	1.26	0	3.04	0	#NULL!	#NULL!	94.8	0	361.6	0	1	1
170	于凤艳	2016	2016-04-13	104076	72.3	45.4	26.9	1.68773	2017-01-06	UA	1	UA	2020-10-09	双支，左前降、左回旋	0	1	0	1	0	0	0	64	0	71	0	5.44	0	134	0	0	233	0	1.51	6.76	1	1.64	0	1.51	0	4.5	1	11	0	68.7	0	223.4	0	1	1
173	李春芳	2016	2016-06-08	104840	70.7	42.1	28.6	1.47203	2017-10-26	UA	#NULL!	UA	#NULL!	单支,左前降支	1	0	0	1	0	0	1	58	0	60	0	8.17	0	153	0	0	232	0	0.79	3.75	0	1.69	0	0.79	1	2.19	0	#NULL!	#NULL!	56.1	0	271.9	0	1	0
175	孙井兰	2016	2016-03-11	94297	74.6	44	30.6	1.43791	#NULL!		#NULL!	UA	2020-10-09	三支	0	0	1	1	0	0	0	71	1	68	0	7.52	0	129	0	1	154	0	#NULL!	#NULL!	0	#NULL!	0	#NULL!	1	#NULL!	0	#NULL!	#NULL!	#NULL!	#NULL!	#NULL!	#NULL!	0	1
176	康健	2016	2016-05-30	103734	81.6	47.2	34.4	1.37209	#NULL!		#NULL!	UA	2020-10-14	三支	0	0	1	1	0	0	0	64	0	44	0	7.89	0	155	0	0	226	0	0.96	3.84	0	0.66	0	0.96	1	2.24	0	37.15	1	64.77	0	374.7	0	0	0
177	杨学义	2016	2016-05-26	103418	62.2	35	27.2	1.28676	#NULL!		#NULL!	UA	2020-10-09	双支，左前降、左回旋	0	1	0	1	0	0	1	70	1	62	0	5.5	0	141	0	0	266	0	1.2	4.1	0	1.36	0	1.2	0	2.28	0	#NULL!	#NULL!	65.7	0	299.7	0	0	0
178	宋泽民	2016	2016-04-11	97959	66.6	34.3	32.3	1.06192	#NULL!		#NULL!	UA	2020-10-09	三支	0	0	1	1	0	0	1	83	1	63	0	4.86	0	130	0	0	153	0	1	3.72	0	0.78	0	1	0	2.19	0	#NULL!	#NULL!	51.1	0	216	0	0	0
179	陈秀芳	2016	2016-05-24	103173	64.6	35.9	28.7	1.25087	#NULL!		#NULL!	UA	2020-10-14	三支	0	0	1	1	0	0	0	60	0	39	1	9.41	0	115	0	1	24	0	1.46	5.07	0	0.55	0	1.46	0	2.83	0	36.71	1	54.12	0	227.5	0	0	0
181	王成福	2016	2016-05-27	103524	74.5	42.7	31.8	1.34277	#NULL!		#NULL!	UA	2020-10-10	三支	0	0	1	1	0	0	1	64	0	58	0	6.28	0	159	0	0	215	0	1.09	5.72	1	2.63	1	1.09	0	3.43	1	9	0	94.4	0	360.1	0	1	1
183	纪振奎	2016	2016-06-04	104481	69.5	36.3	33.2	1.09337	#NULL!		#NULL!	UA	2020-10-10	三支	0	0	1	1	0	0	1	65	0	70	0	6.38	0	161	0	0	225	0	0.78	3.92	0	3.55	1	0.78	1	1.53	0	#NULL!	#NULL!	83.8	0	351.3	0	1	1
185	李春树	2016	2016-06-13	105310	68.7	39.6	29.1	1.36082	#NULL!		#NULL!	UA	2020-10-10	单支，左前降	1	0	0	1	0	0	1	58	0	66	0	6.27	0	139	0	0	174	0	1.18	3.58	0	0.91	0	1.18	0	1.99	0	29	1	54.6	0	313	0	0	1
190	刘景臣	2016	2016-06-20	106282	78.8	45.2	33.6	1.34524	2018-09-20	UA	1	UA	#NULL!	单支，左前降	1	0	0	1	0	0	1	51	0	54	0	7.21	0	154	0	0	247	0	0.92	4.66	0	2.61	1	0.92	1	2.8	0	#NULL!	#NULL!	63.2	0	329.2	0	1	0
193	孙成柱	2016	2016-06-17	105905	67.5	41.9	25.6	1.63672	2016-12-28	UA	1	UA	#NULL!	三支	0	0	1	1	0	0	1	40	0	60	0	11.25	1	167	0	0	191	0	0.92	3.21	0	2.57	1	0.92	1	1.12	0	#NULL!	#NULL!	78.5	0	309	0	1	1
194	张占国	2016	2016-06-27	107064	85.4	50.1	35.3	1.41926	#NULL!		#NULL!	UA	2020-10-10	双支，左前降、右冠	0	1	0	1	0	0	1	49	0	56	0	9.46	1	158	0	0	261	0	1.11	4.32	0	2.75	1	1.11	0	1.96	0	9	0	72.2	0	386.8	0	1	1
199	冯永昌	2016	2016-06-07	104741	69.1	38.6	30.5	1.26557	2016-08-24	UA	#NULL!	UA	#NULL!	三支	0	0	1	1	0	0	1	77	1	54	0	5.54	0	132	0	0	196	0	1.08	3.07	0	0.62	0	1.08	0	1.71	0	10	0	82.2	0	236.6	0	0	1
201	王福齐	2016	2016-07-01	107582	74.2	41.3	32.9	1.25532	2017-04-25	UA	#NULL!	UA	#NULL!	三支	0	0	1	1	0	0	1	55	0	60	0	6.92	0	143	0	0	297	0	0.77	3.62	0	5	1	0.77	1	0.58	0	8	0	74.4	0	421.7	0	1	1
202	赵桂芝	2016	2016-07-04	107870	71.2	40.8	30.4	1.34211	#NULL!		#NULL!	UA	2020-10-09	双支，左前降、左回旋	0	1	0	1	0	0	0	72	1	59	0	6.72	0	131	0	0	283	0	1.27	3.11	0	1.11	0	1.27	0	1.34	0	#NULL!	#NULL!	57.9	0	208.9	0	1	1
206	张荣合	2016	2016-07-04	107938	63.9	37	26.9	1.37546	#NULL!		#NULL!	UA	2020-10-10	双支，左回旋、右冠	0	1	0	1	0	0	1	64	0	56	0	6.2	0	154	0	0	153	0	1.33	5.15	0	2.28	1	1.33	0	2.77	0	3	0	70.5	0	337.3	0	1	1
207	张文芝	2016	2016-07-04	107955	63.6	38.3	25.3	1.51383	#NULL!		#NULL!	UA	2020-10-09	单支，左回旋支	1	0	0	1	0	0	0	70	1	57	0	6.4	0	124	0	1	233	0	1.16	5.63	1	4.38	1	1.16	0	2.48	0	18	1	58.4	0	249.4	0	1	1
210	付宪珍	2016	2016-07-07	108665	68.5	43.3	25.2	1.71825	#NULL!		#NULL!	UA	2020-10-09	单支，左前降支	1	0	0	1	0	0	0	61	0	70	0	3.71	1	123	0	0	216	0	1.03	3.74	0	2.73	1	1.03	0	1.47	0	13	0	62.41	0	263.6	0	1	0
211	丁志亭	2016	2016-06-29	107305	70.6	37.1	33.5	1.10746	#NULL!		#NULL!	UA	2020-10-10	三支血管病变	0	0	1	1	0	0	1	72	1	69	0	5.63	0	130	0	0	125	0	1.05	3.92	0	0.6	0	1.05	0	2.6	0	6	0	64.8	0	269.3	0	0	0
212	孙桂芬	2016	2016-07-18	109444	72.8	35.9	36.9	0.9729	#NULL!		#NULL!	UA	2020-10-09	单支，右冠	1	0	0	1	0	0	0	53	0	59	0	6.43	0	132	0	0	185	0	1.15	3.67	0	1.6	0	1.15	0	1.79	0	17	1	71.7	0	242	0	1	0
215	李士贤	2016	2016-07-21	110067	61	34.1	26.9	1.26766	#NULL!		#NULL!	UA	2020-10-10	单支，左前降支	1	0	0	1	0	0	1	72	1	#NULL!	#NULL!	9.49	1	137	0	0	217	0	1.04	2.55	0	0.57	0	1.04	0	1.25	0	11	0	49.31	0	291.8	0	0	0
216	蔡文生	2016	2016-07-14	109103	68.9	36.1	32.8	1.10061	#NULL!		#NULL!	UA	2020-10-10	单支，左前降	1	0	0	1	0	0	1	46	0	62	0	5.82	0	133	0	0	174	0	0.99	3.53	0	1.45	0	0.99	1	1.88	0	19	1	66.3	0	395.2	0	0	0
222	王立峰	2016	2016-07-25	110424	79	41.3	37.7	1.09549	#NULL!		#NULL!	UA	2020-10-10	单支，右冠	1	0	0	1	0	0	1	46	0	63	0	9.21	0	144	0	0	235	0	0.83	3.14	0	4.08	1	0.83	1	0.46	0	3	0	104.3	0	541.8	1	1	1
226	王利忠	2016	2016-07-29	111003	72.6	39.4	33.2	1.18675	#NULL!		#NULL!	UA	2020-10-10	三支	0	0	1	1	0	0	1	61	0	70	0	10.7	1	161	0	0	205	0	1.01	4.08	0	3.26	1	1.01	0	1.59	0	18	1	82.5	0	384.3	0	1	1
234	昶彦东	2016	2016-08-09	112271	68.7	41.5	27.2	1.52574	2017-10-27	UA	#NULL!	UA	#NULL!	单支，左前降支	1	0	0	1	0	0	1	33	0	52	0	6.94	0	184	0	0	248	0	1.22	4.9	0	2.23	1	1.22	0	2.67	0	7	0	94	0	688.7	1	1	1
235	李桂珍	2016	2016-08-08	35077	85.5	43.8	41.7	1.05036	#NULL!		#NULL!	UA	2020-10-09	单支，左前降支	1	0	0	1	0	0	0	64	0	61	0	6.26	0	136	0	0	235	0	1.24	4.06	0	1.98	1	1.24	0	1.96	0	#NULL!	#NULL!	63.2	0	220.2	0	0	1
248	崔晓伟	2016	2016-08-17	113297	62.4	36.3	26.1	1.3908	#NULL!		#NULL!	UA	2020-10-10	双支，左前降、左回旋	0	1	0	1	0	0	1	60	0	59	0	15.6	1	128	0	0	189	0	1.26	3.49	0	0.87	0	1.26	0	1.83	0	11	0	98.5	0	334.8	0	0	1
249	刘素云	2016	2016-08-22	113765	72	42	30	1.4	#NULL!		#NULL!	UA	2020-10-09	单支，左前降支	1	0	0	1	0	0	0	63	0	67	0	5.55	0	122	0	1	185	0	0.99	4.86	0	1.65	0	0.99	1	2.95	0	#NULL!	#NULL!	84.2	0	239.9	0	1	0
250	付东超	2016	2016-08-25	114215	70.6	38.9	31.7	1.22713	#NULL!		#NULL!	UA	2020-10-10	双支，左前降、左回旋	0	1	0	1	0	0	1	64	0	65	0	7.1	0	153	0	0	151	0	1.11	3.82	0	2.19	1	1.11	0	1.71	0	9	0	78.2	0	380.4	0	1	0
251	姜素华	2016	2016-08-22	113698	80.3	46.1	34.2	1.34795	#NULL!		#NULL!	UA	2020-10-18	三支	0	0	1	1	0	0	0	55	0	61	0	5.46	0	137	0	0	246	0	1.28	4.43	0	1.34	0	1.28	0	2.54	0	22	1	50.51	0	223.1	0	0	1
254	任杰	2016	2016-08-05	111813	78.4	42.7	35.7	1.19608	#NULL!		#NULL!	UA	2020-10-10	双支，左前降、左回旋	0	1	0	1	0	0	1	60	0	53	0	5.44	0	128	0	1	269	0	1.09	4.93	0	1.88	1	1.09	0	2.99	0	30	1	89.8	0	235.2	0	1	1
256	孙绍清	2016	2016-08-29	51337	70.8	42.3	28.5	1.48421	#NULL!		#NULL!	UA	2020-10-10	单支，左前降支	1	0	0	1	0	0	0	60	0	65	0	8.45	0	125	0	1	316	0	0.98	3.16	0	0.69	0	0.98	1	1.82	0	#NULL!	#NULL!	55.7	0	206.9	0	1	0
257	黄海涛	2016	2016-10-21	114096	77.3	43.7	33.6	1.3006	#NULL!		#NULL!	UA	2020-10-10	双支，左前降、左回旋	0	1	0	1	0	0	1	56	0	65	0	6.86	0	156	0	0	211	0	1.07	3.51	0	1.2	0	1.07	0	1.89	0	14	0	67.5	0	226	0	0	1
260	孟德文	2016	2015-05-13	63386	76.3	40.1	36.2	1.10773	#NULL!		#NULL!	UA	2020-10-10	三支，左前降支、左回旋支、右冠	0	0	1	1	0	0	1	59	0	55	0	8.61	0	150	0	0	299	0	1.41	4.84	0	1.48	0	1.41	0	2.76	0	7	0	83.1	0	381	0	0	1
261	黄本明	2016	2016-09-05	115370	61.6	36.3	25.3	1.43478	#NULL!		#NULL!	UA	2020-10-10	三支	0	0	1	1	0	0	1	57	0	57	0	5.35	0	137	0	0	256	0	0.88	5.1	0	2.72	1	0.88	1	2.98	0	7	0	64.8	0	385.7	0	1	1
262	孟繁斌	2016	2016-09-06	115530	67.8	39.8	28	1.42143	#NULL!		#NULL!	UA	2020-10-10	单支，左前降支	1	0	0	1	0	0	1	54	0	63	0	7.58	0	155	0	0	206	0	1.19	4.72	0	1.42	0	1.19	0	2.88	0	4	0	62.1	0	333.1	0	0	0
263	褚秀华	2016	2016-05-25	115512	72.8	41.1	31.7	1.29653	#NULL!		#NULL!	UA	2020-10-10	双支，左前降、左回旋	0	1	0	1	0	0	0	54	0	56	0	5.81	0	132	0	0	181	0	1.06	4.58	0	1.8	1	1.06	0	2.7	0	32	1	48.6	0	322.8	0	1	0
265	邱忠言	2016	2016-09-11	116037	76.3	42.5	33.8	1.2574	#NULL!		#NULL!	UA	2020-10-10	三支	0	0	1	1	0	0	1	60	0	58	0	4.88	0	140	0	0	201	0	1.16	4.62	0	1.29	0	1.16	0	2.87	0	5	0	66.8	0	436.6	0	0	0
270	赵海永	2016	2016-09-09	115907	74.7	50.7	24	2.1125	#NULL!		#NULL!	UA	2020-10-10	单支，左前降支	1	0	0	1	0	0	1	38	0	#NULL!	#NULL!	7.49	1	167	0	0	218	0	0.99	6.05	1	1.79	1	0.99	1	3.93	1	#NULL!	#NULL!	71.1	0	363.3	0	1	0
271	于祥	2016	2016-09-13	116205	70.9	39.8	31.1	1.27974	#NULL!		#NULL!	UA	2020-10-10	双支，左前降、右冠	0	1	0	1	0	0	1	70	1	74	0	6.38	0	152	0	0	326	0	1.5	3.91	0	0.79	0	1.5	0	2.05	0	#NULL!	#NULL!	63.5	0	251.4	0	0	1
272	王成春	2016	2016-09-18	116585	60.6	40.7	19.9	2.04523	#NULL!		#NULL!	UA	2020-10-10	单支，左前降支	1	0	0	1	0	0	1	53	0	62	0	6.59	0	167	0	0	185	0	0.49	2.24	0	2.62	1	0.49	1	0.83	0	#NULL!	#NULL!	66.5	0	414.5	0	1	1
274	刘秀荣	2016	2016-09-19	116736	74.4	42.7	31.7	1.347	#NULL!		#NULL!	UA	2020-10-10	三支	0	0	1	1	0	0	0	61	0	70	0	7	0	133	0	0	214	0	1.03	5.15	0	5.93	1	1.03	0	1.42	0	4	0	53.3	0	243.9	0	0	1
277	冯志刚	2016	2016-09-18	33327	62.5	40.1	22.4	1.79018	#NULL!		#NULL!	UA	2020-10-10	三支	0	0	1	1	0	0	1	57	0	42	0	8.52	0	153	0	0	202	0	0.71	3.32	0	1.68	0	0.71	1	2.07	0	11	0	65	0	306	0	0	0
281	宋艳春	2016	2016-09-23	117398	66.7	38.8	27.9	1.39068	#NULL!		#NULL!	UA	2020-10-10	单支，左前降支	1	0	0	1	0	0	1	34	0	56	0	7.85	0	166	0	0	287	0	0.89	3.96	0	2.15	1	0.89	1	2.09	0	9	0	103.5	0	502.9	0	1	1
294	刘子荣	2016	2016-08-26	114298	84.1	43.2	40.9	1.05623	#NULL!		#NULL!	UA	2020-10-10	单支，左前降	1	0	0	1	0	0	0	62	0	65	0	6.48	1	140	0	0	436	0	0.96	5.89	1	5.93	1	0.96	1	2.23	0	#NULL!	#NULL!	46.7	0	325.7	0	0	1
298	白玉洁	2016	2016-10-18	119996	81.5	45.3	36.2	1.25138	#NULL!		#NULL!	UA	2020-10-10	三支	0	0	1	1	0	0	0	62	0	61	0	8.5	0	138	0	0	308	0	1.33	5.45	1	2.45	1	1.33	0	3.01	0	47	1	45.1	0	317	0	1	1
301	卜桂芹	2016	2016-10-17	119708	71.3	40	31.3	1.27796	#NULL!		#NULL!	UA	2020-10-10	单支，右冠	1	0	0	1	0	0	0	76	1	66	0	7.6	0	140	0	0	197	0	2.03	4.49	0	1.46	0	2.03	0	1.8	0	#NULL!	#NULL!	57.7	0	311	0	0	1
309	范志国	2016	2016-10-24	120581	64.5	37.1	27.4	1.35401	#NULL!		#NULL!	UA	2020-10-10	三支	0	0	1	1	0	0	1	58	0	66	0	5.53	0	157	0	0	177	0	0.8	3.17	0	4.43	1	0.8	1	0.36	0	#NULL!	#NULL!	68.4	0	454.3	0	1	1
311	张林辉	2016	2016-11-01	117764	58	39.1	18.9	2.06878	#NULL!		#NULL!	UA	2020-10-10	双支，左前降、左回旋	0	1	0	1	0	0	1	59	0	60	0	8.36	0	147	0	0	172	0	1	3.38	0	0.66	0	1	0	1.55	0	#NULL!	#NULL!	53.4	0	211.7	0	0	1
312	刘富民	2016	2016-10-30	121390	66.9	36.9	30	1.23	#NULL!		#NULL!	UA	2020-10-10	三支	0	0	1	1	0	0	1	49	0	72	0	7.3	0	145	0	0	184	0	1.2	3.49	0	1.8	1	1.2	0	1.47	0	10	0	58.7	0	242.3	0	1	1
313	张国财	2016	2016-11-01	121763	84.5	45.5	39	1.16667	#NULL!		#NULL!	UA	2020-10-10	三支	0	0	1	1	0	0	1	55	0	#NULL!	#NULL!	4.68	0	162	0	0	167	0	1.25	6.02	1	1.41	0	1.25	0	4.13	1	3	0	79.2	0	328.6	0	1	0
314	刘晓东	2016	2016-10-17	119673	73.8	38.8	35	1.10857	#NULL!		#NULL!	UA	2020-10-10	多支，左前降、中间支、左回旋、右冠	0	0	1	1	0	0	1	54	0	36	1	8.8	0	174	0	0	171	0	0.8	3.78	0	1.76	1	0.8	1	2.18	0	8	0	100.3	0	698.8	1	1	1
320	缪文玉	2016	2016-11-09	122703	74.5	41.3	33.2	1.24398	#NULL!		#NULL!	UA	2020-10-14	多支，左前降、左前降、左回旋、右冠	0	0	1	1	0	0	0	76	1	44	0	7.62	0	131	0	0	204	0	1.09	5.23	1	2.79	1	1.09	0	3.03	0	32.49	1	73.58	0	320.9	0	1	0
321	张士军	2016	2016-11-08	122657	76.6	42.5	34.1	1.24633	#NULL!		#NULL!	UA	2020-10-10	双支，左回旋、右冠	0	1	0	1	0	0	1	57	0	56	0	8.3	0	167	0	0	222	0	0.85	4.78	0	5.93	1	0.85	1	1.23	0	10	0	85.3	0	325.6	0	1	1
322	孔宪金	2016	2016-11-07	122356	72	39.4	32.6	1.20859	#NULL!		#NULL!	UA	2020-10-10	单支，左前降	1	0	0	1	0	0	0	66	1	55	0	6.15	0	123	0	1	237	0	1.56	4.23	0	0.97	0	1.56	0	2.23	0	14	0	56.4	0	282.2	0	0	1
323	杨广亭	2016	2016-11-08	122564	73.7	38.9	34.8	1.11782	#NULL!		#NULL!	UA	2020-10-10	单支，左前降	1	0	0	1	0	0	1	70	1	71	0	5.15	0	147	0	0	204	0	1.19	4.67	0	2.49	1	1.19	0	2.35	0	14	0	79	0	355.7	0	1	1
329	杨振栓	2016	2016-11-15	123477	73.1	37	36.1	1.02493	#NULL!		#NULL!	UA	2020-10-10	单支，左前降支	1	0	0	1	0	0	1	63	0	#NULL!	#NULL!	5.37	0	141	0	0	263	0	1.04	3.92	0	1.31	0	1.04	0	2.28	0	6	0	144.4	1	583.2	1	0	1
331	任立军	2016	2016-11-11	123025	68.1	37.6	30.5	1.23279	#NULL!		#NULL!	UA	2020-10-10	单支，左前降支	1	0	0	1	0	0	1	45	0	57	0	5.67	0	148	0	0	236	0	1.11	4.26	0	5.13	1	1.11	0	0.82	0	14	0	59.7	0	244.5	0	1	0
336	武仲合	2016	2016-11-21	85747	76.1	43.6	32.5	1.34154	2016-11-21	UA	1	UA	#NULL!	单支，左前降支	1	0	0	1	0	0	1	49	0	66	0	11.27	1	159	0	0	184	0	1.26	5.77	1	1.31	0	1.26	0	3.91	1	9	0	72.4	0	336.3	0	1	1
341	赵子利	2016	2015-09-18	76134	57.4	34.2	23.2	1.47414	#NULL!		#NULL!	UA	2020-10-11	三支	0	0	1	1	0	0	1	51	0	71	0	5.57	0	136	0	0	145	0	0.89	5.85	1	4.96	1	0.89	1	2.71	0	7	0	79.8	0	453.5	0	1	1
346	苗成荣	2016	2016-12-05	125846	71.8	38.6	33.2	1.16265	#NULL!		#NULL!	UA	2020-10-11	三支	0	0	1	1	0	0	1	58	0	66	0	7.61	0	168	0	0	194	0	0.83	4.66	0	2.21	1	0.83	1	2.83	0	9	0	70.6	0	437.5	0	1	0
347	孙桂花	2016	2016-12-05	125767	71.1	42.5	28.6	1.48601	#NULL!		#NULL!	UA	2020-10-14	三支	0	0	1	1	0	0	0	61	0	47	0	4.7	0	144	0	0	239	0	0.93	4.84	0	1.66	0	0.93	1	2.96	0	12.85	0	64	0	248	0	1	1
349	李素荣	2016	2016-08-22	125862	73.1	39.2	33.9	1.15634	2018-03-19	UA	#NULL!	UA	#NULL!	三支	0	0	1	1	0	0	0	48	0	59	0	5.3	0	133	0	0	278	0	1.69	6.42	1	1.81	1	1.69	0	3.91	1	4	0	55.1	0	286.5	0	0	1
352	张淑莲	2016	2016-12-13	127000	74.3	45.5	28.8	1.57986	#NULL!		#NULL!	UA	2020-10-15	双支，左前降、右冠	0	1	0	1	0	0	0	54	0	#NULL!	#NULL!	4.3	0	135	0	0	33	0	0.85	4.79	0	2.99	1	0.85	1	2.85	0	9.18	0	47.5	0	213.42	0	1	1
353	孟庆林	2016	2016-12-10	126587	82.6	43.5	39.1	1.11253	2018-01-09	UA	#NULL!	UA	#NULL!	单支，左回旋	1	0	0	1	0	0	1	71	1	63	0	5.74	0	140	0	0	290	0	1.52	4.08	0	2.31	1	1.52	0	1.51	0	11	0	67	0	256.4	0	1	1
358	刘桂芬	2016	2016-12-09	126501	68.2	38.4	29.8	1.28859	2017-02-06	UA	1	UA	#NULL!	三支	0	0	1	1	0	0	0	67	1	61	0	5.92	0	125	0	1	182	0	1.6	5.06	0	0.91	0	1.6	0	3.05	0	11	0	39.4	0	242.1	0	1	1
359	杨凤英	2016	2016-08-29	127090	73.1	42.3	30.8	1.37338	#NULL!		#NULL!	UA	2020-10-10	单支，左前降支	1	0	0	1	0	0	0	59	0	56	0	4.99	0	139	0	0	208	0	0.96	4.8	0	1.99	1	0.96	1	2.85	0	#NULL!	#NULL!	53.1	0	297.1	0	1	0
360	刘秉德	2016	2016-12-14	127129	68.1	43.3	24.8	1.74597	#NULL!		#NULL!	UA	2020-10-11	单支，左前降支	1	0	0	1	0	0	1	64	0	69	0	8.01	0	151	0	0	206	0	0.91	4.99	0	2.85	1	0.91	1	1.97	0	#NULL!	#NULL!	69.2	0	363.8	0	1	0
362	韩春祥	2016	2016-12-12	126693	67.8	44.2	23.6	1.87288	#NULL!		#NULL!	UA	2020-10-11	三支	0	0	1	1	0	0	1	63	0	51	0	5.66	0	164	0	0	168	0	1.06	5.03	0	1.25	0	1.06	0	2.18	0	28	1	97.2	0	348	0	0	1
364	张景成	2016	2016-12-16	127329	59.9	35.2	24.7	1.4251	2017-02-22	UA	1	UA	#NULL!	多支，左主干、左前降、左回旋	0	0	1	1	0	0	1	52	0	#NULL!	#NULL!	5.8	0	134	0	0	258	0	0.99	3.88	0	0.86	0	0.99	1	2.5	0	12	0	60.9	0	444.2	0	0	0
365	刘向伟	2016	2016-12-07	126148	77.7	41.9	35.8	1.17039	2017-09-12	UA	#NULL!	UA	#NULL!	双支，左前降、左回旋	0	1	0	1	0	0	1	46	0	66	0	6.33	0	145	0	0	260	0	0.79	4.77	0	1.91	1	0.79	1	3.11	0	10	0	73.8	0	468.9	0	1	1
366	王学阁	2016	2016-12-06	31113	63.8	36.1	27.7	1.30325	#NULL!		#NULL!	UA	2020-10-11	三支	0	0	1	1	0	0	1	63	0	62	0	9.3	0	174	0	0	217	0	0.76	2.54	0	1.36	0	0.76	1	1.36	0	#NULL!	#NULL!	114.7	1	371.7	0	1	0
367	刘恩义	2016	2016-12-12	126876	64.9	36.9	28	1.31786	2018-01-15	UA	#NULL!	UA	#NULL!	双支，左前降、右冠	0	1	0	1	0	0	1	48	0	#NULL!	#NULL!	6.95	0	151	0	0	216	0	0.72	5.82	1	6.68	1	0.72	1	2.06	0	10	0	98.7	0	204.2	0	1	0
368	侯忠	2016	2016-12-01	125431	66.1	40.4	25.7	1.57198	#NULL!		#NULL!	UA	2020-10-11	单支，左前降支	1	0	0	1	0	0	1	54	0	67	0	8.2	0	145	0	0	222	0	1.31	3.51	0	0.66	0	1.31	0	1.69	0	16.4	1	96.45	0	343	0	0	0
369	张永功	2016	2016-12-07	66546	66	36.7	29.3	1.25256	#NULL!		#NULL!	UA	2020-10-11	双支，左前降、右冠	0	1	0	1	0	0	1	75	1	60	0	6.54	0	128	0	1	157	0	1.34	4.01	0	0.61	0	1.34	0	2.34	0	13	0	64.2	0	284.2	0	0	1
371	仲寿山	2016	2016-12-20	127863	65.1	39.6	25.5	1.55294	#NULL!		#NULL!	UA	2020-10-11	单支，左前降支	1	0	0	1	0	0	1	59	0	62	0	6.26	0	157	0	0	132	0	1.55	5.09	0	2.05	1	1.55	0	2.61	0	6	0	54.6	0	379.5	0	1	1
372	李成德	2016	2016-12-20	127800	67.7	41.7	26	1.60385	#NULL!		#NULL!	UA	2020-10-11	单支，左前降支	1	0	0	1	0	0	1	59	0	65	0	5.66	0	137	0	0	264	0	0.95	3.78	0	1.86	1	0.95	1	1.98	0	4	0	60.8	0	255.2	0	1	1
374	王森农	2016	2016-12-23	128048	65.9	40.4	25.5	1.58431	#NULL!		#NULL!	UA	2020-10-11	单支，左前降支	1	0	0	1	0	0	1	52	0	58	0	7.13	0	143	0	0	194	0	1.1	2.65	0	0.65	0	1.1	0	1.25	0	13	0	59.7	0	277.8	0	0	0
375	孙东	2016	2016-12-26	128542	63.2	39.5	23.7	1.66667	#NULL!		#NULL!	UA	2020-10-11	单支，左前降支	1	0	0	1	0	0	1	45	0	64	0	5.38	0	145	0	0	265	0	1.31	4.72	0	1.48	0	1.31	0	3.07	0	#NULL!	#NULL!	63.99	0	393.1	0	0	1
376	陶瑞峰	2016	2016-12-22	128132	62.4	37	25.4	1.45669	#NULL!		#NULL!	UA	2020-10-11	三支	0	0	1	1	0	0	1	61	0	64	0	5.57	0	137	0	0	156	0	0.98	3.11	0	1.14	0	0.98	1	1.61	0	#NULL!	#NULL!	57.7	0	349.8	0	0	1
377	王学阁	2016	2016-12-06	31113	63.8	36.1	27.7	1.30325	#NULL!		#NULL!	UA	2020-10-11	三支	0	0	1	1	0	0	1	63	0	62	0	9.3	0	174	0	0	217	0	0.76	2.54	0	1.36	0	0.76	1	1.36	0	#NULL!	#NULL!	114.7	1	371.7	0	1	0
378	刘瑞民	2016	2016-12-23	128203	70.3	43.5	26.8	1.62313	#NULL!		#NULL!	UA	2020-10-11	三支	0	0	1	1	0	0	1	54	0	52	0	6.85	0	149	0	0	172	0	0.9	2.86	0	2.97	1	0.9	1	0.61	0	9	0	52	0	359.5	0	1	1
380	李淑芬	2016	2016-12-26	128429	69.4	38.8	30.6	1.26797	#NULL!		#NULL!	UA	2020-10-10	单支，左前降支	1	0	0	1	0	0	0	46	0	63	0	7.31	0	137	0	0	260	0	0.67	3.92	0	1.38	0	0.67	1	2.4	0	9	0	63.8	0	320.9	0	1	0
387	张守生	2017	2017-01-01	72726	71.6	38.7	32.9	1.17629	#NULL!		#NULL!	UA	2020-10-11	三支	0	0	1	1	0	0	1	63	0	63	0	7.73	0	136	0	0	118	0	0.81	2.14	0	1.79	1	0.81	1	0.52	0	12	0	55.5	0	206.3	0	1	1
389	李亚军	2017	2017-01-02	129261	65.7	42.7	23	1.85652	2017-07-06	UA	1	UA	2020-10-11	单支，右冠	1	0	0	1	0	0	1	43	0	55	0	7.9	0	162	0	0	164	0	0.8	2.68	0	0.93	0	0.8	1	1.47	0	#NULL!	#NULL!	66	0	352.9	0	1	1
390	孙成柱	2017	2016-06-17	105905	67.5	41.9	25.6	1.63672	2016-12-08	UA	1	UA	#NULL!	三支	0	0	1	1	0	0	1	40	0	55	0	7.44	0	183	0	0	173	0	0.92	3.21	0	2.57	1	0.92	1	1.12	0	#NULL!	#NULL!	71.3	0	317.1	0	1	1
392	张锦秀	2017	2016-12-30	99599	76.6	46.4	30.2	1.53642	#NULL!		#NULL!	UA	2020-10-10	三支	0	0	1	1	0	0	0	71	1	57	0	7.54	0	140	0	0	243	0	1.52	4.06	0	2.54	1	1.52	0	1.39	0	46	1	68	0	432.6	0	1	1
394	张保珍	2017	2017-01-03	129369	64.8	38.2	26.6	1.43609	#NULL!		#NULL!	UA	2020-10-11	三支	0	0	1	1	0	0	1	69	1	60	0	6.65	0	142	0	0	184	0	0.89	4.73	0	2.15	1	0.89	1	2.86	0	22	1	69.3	0	221.4	0	1	1
396	卢军	2017	2017-01-03	129488	57.7	34.9	22.8	1.5307	#NULL!		#NULL!	SAP	2020-10-11	双支，左前降、右冠	0	1	0	1	0	0	1	57	0	56	0	5.61	0	155	0	0	199	0	0.89	3.97	0	1.36	0	0.89	1	2.46	0	8	0	65	0	478.4	0	0	1
397	张永平	2017	2016-12-30	129085	71.1	39.5	31.6	1.25	#NULL!		#NULL!	UA	2020-10-10	双支，左回旋、右冠	0	1	0	1	0	0	0	52	0	61	0	8.81	0	113	0	1	211	0	0.86	4.79	0	3.33	1	0.86	1	1.16	0	30	1	59	0	403	0	1	1
402	国文祥	2017	2017-01-09	124361	74.6	45.5	29.1	1.56357	#NULL!		#NULL!	UA	2020-10-11	单支，左前降	1	0	0	1	0	0	1	64	0	59	0	4.59	0	153	0	0	128	0	0.91	3.63	0	1.5	0	0.91	1	2.04	0	15	0	67.9	0	338.6	0	0	0
403	黄秋田	2017	2016-12-27	128672	73.4	40.7	32.7	1.24465	2018-04-28	UA	#NULL!	UA	#NULL!	三支	0	0	1	1	0	0	1	72	1	71	0	7.36	0	171	0	0	189	0	1.26	4.68	0	1.5	0	1.26	0	2.74	0	13	0	76.8	0	372	0	0	1
404	毕成才	2017	2017-01-09	125275	66.7	37.9	28.8	1.31597	#NULL!		#NULL!	UA	2020-10-11	三支	0	0	1	1	0	0	1	80	1	60	0	6.99	0	151	0	0	204	0	1.42	3.22	0	1.53	0	1.42	0	1.1	0	9	0	47.04	0	249.8	0	0	0
405	荣宽	2017	2017-01-04	129633	77.3	43.9	33.4	1.31437	#NULL!		#NULL!	UA	2020-10-11	双支，左前降、左回旋	0	1	0	1	0	0	1	54	0	64	0	9.77	1	151	0	0	216	0	0.56	3.4	0	2.02	1	0.56	1	2.42	0	#NULL!	#NULL!	85.5	0	421.8	0	1	1
410	任铁石	2017	2017-01-15	130917	67.3	38	29.3	1.29693	#NULL!		#NULL!	UA	2020-10-11	三支	0	0	1	1	0	0	1	62	0	53	0	6.67	0	135	0	0	226	0	0.79	3.17	0	0.99	0	0.79	1	1.93	0	20	1	53.4	0	358.5	0	1	1
412	张立志	2017	2017-01-16	131058	72.9	43.7	29.2	1.49658	#NULL!		#NULL!	UA	2020-10-11	三支	0	0	1	1	0	0	1	51	0	73	0	7.34	0	172	0	0	221	0	0.65	4.62	0	4.9	1	0.65	1	2.08	0	#NULL!	#NULL!	75.2	0	432.2	0	1	1
415	纪瑞兴	2017	2017-01-17	131185	80.5	45.4	35.1	1.29345	#NULL!		#NULL!	UA	2020-10-11	三支	0	0	1	1	0	0	1	62	0	66	0	4.95	0	137	0	0	307	0	0.67	3.08	0	2.82	1	0.67	1	1.13	0	13	0	89.5	0	467	0	1	1
418	曲长友	2017	2017-01-16	49578	71.8	44.2	27.6	1.60145	#NULL!		#NULL!	UA	2020-10-11	三支	0	0	1	1	0	0	1	56	0	59	0	7.97	0	155	0	0	203	0	1.04	3.57	0	1.47	0	1.04	0	1.86	0	19	1	57.5	0	280.2	0	0	0
421	陈井雨	2017	2017-01-21	131528	75.1	40.7	34.4	1.18314	#NULL!		#NULL!	UA	2020-10-11	三支	0	0	1	1	0	0	1	65	0	67	0	7.47	0	139	0	0	202	0	0.92	3.61	0	2.68	1	0.92	1	1.47	0	13	0	57.6	0	246	0	1	0
422	谢兰云	2017	2017-01-22	131583	77.2	44.6	32.6	1.3681	#NULL!		#NULL!	UA	2020-10-10	单支，左回旋	1	0	0	1	0	0	0	66	1	78	0	6.29	0	145	0	0	265	0	1.25	4.03	0	2.11	1	1.25	0	1.82	0	23	1	94.7	0	426.6	0	0	1
423	王翠英	2017	2017-01-18	131300	65.3	39.8	25.5	1.56078	#NULL!		#NULL!	UA	2020-10-10	单支，左前降支对角支	1	0	0	1	0	0	0	61	0	64	0	6.41	0	142	0	0	245	0	1.35	4.91	0	1.64	0	1.35	0	2.81	0	17	1	54.4	0	336.5	0	0	1
424	周系龙	2017	2017-01-20	126173	71.8	40.5	31.3	1.29393	#NULL!		#NULL!	UA	2020-10-11	单支，右冠	1	0	0	1	0	0	1	65	0	56	0	6.67	0	148	0	0	211	0	0.75	3.38	0	1.72	1	0.75	1	1.85	0	#NULL!	#NULL!	72.1	0	295.1	0	1	1
425	刘玉忠	2017	2017-01-13	130746	81.1	47.3	33.8	1.39941	#NULL!		#NULL!	UA	2020-10-11	双支，左前降、右冠	0	1	0	1	0	0	1	63	0	59	0	5.97	0	138	0	0	242	0	0.89	4.14	0	3.07	1	0.89	1	1.85	0	7	0	66.3	0	313.2	0	1	1
432	邵桂花	2017	2017-02-05	132727	67.5	38.6	28.9	1.33564	#NULL!		#NULL!	UA	2020-10-10	双支，左回旋、右冠	0	1	0	1	0	0	0	69	1	61	0	4.78	0	118	0	1	253	0	0.99	3.12	0	0.45	0	0.99	1	1.93	0	88	1	63.3	0	275.3	0	1	0
433	胡义芹	2017	2017-01-26	131836	79.3	41	38.3	1.0705	2018-11-13	陈旧性心梗	#NULL!	UA	#NULL!	双支，左前降、左回旋	0	1	0	1	0	0	0	64	0	69	0	4.19	0	133	0	0	84	0	1.04	4.31	0	2.56	1	1.04	0	2.11	0	#NULL!	#NULL!	73.4	0	316.1	0	1	1
437	曹井才	2017	2017-02-03	132515	67.8	38.6	29.2	1.32192	#NULL!		#NULL!	UA	2020-10-11	双支，左前降、右冠	0	1	0	1	0	0	1	62	0	63	0	6.3	0	146	0	0	232	0	1.37	4.42	0	0.51	0	1.37	0	2.82	0	10	0	58.7	0	328.3	0	0	0
438	郑文焕	2017	2017-02-03	132420	63.6	41.2	22.4	1.83929	#NULL!		#NULL!	UA	2020-10-11	三支	0	0	1	1	0	0	1	57	0	63	0	7.74	0	156	0	0	163	0	0.85	3.61	0	1.2	0	0.85	1	2.02	0	#NULL!	#NULL!	74.63	0	439.4	0	0	1
442	姜友	2017	2017-02-07	21631	77.9	43.2	34.7	1.24496	#NULL!		#NULL!	UA	2020-10-11	双支，左前降、右冠	0	1	0	1	0	0	1	73	1	61	0	8.31	0	134	0	0	199	0	1.11	2.19	0	1.32	0	1.11	0	0.48	0	11	0	74.38	0	297.2	0	0	1
444	王世宝	2017	2017-01-25	131774	67.6	39.9	27.7	1.44043	#NULL!		#NULL!	UA	2020-10-11	双支，左前降、右冠	0	1	0	1	0	0	1	72	1	54	0	5.59	0	147	0	0	139	0	#NULL!	#NULL!	0	#NULL!	0	#NULL!	1	#NULL!	0	#NULL!	#NULL!	56	0	229.1	0	0	0
447	张洪山	2017	2017-02-06	132952	68.2	42.2	26	1.62308	#NULL!		#NULL!	UA	2020-10-11	三支	0	0	1	1	0	0	1	53	0	55	0	8.96	0	162	0	0	266	0	0.73	5.3	1	2.97	1	0.73	1	2.75	0	#NULL!	#NULL!	75.85	0	449	0	1	1
449	程玉福	2017	2017-02-14	134246	65.9	40.2	25.7	1.5642	#NULL!		#NULL!	UA	2020-10-11	单支，左回旋	1	0	0	1	0	0	1	57	0	65	0	4.11	0	153	0	0	175	0	1.77	4.07	0	1.22	0	1.77	0	1.75	0	7	0	69.9	0	360	0	0	0
450	刘亚树	2017	2017-02-13	134065	74.6	45.1	29.5	1.52881	#NULL!		#NULL!	UA	2020-10-11	双支，左前降、右冠	0	1	0	1	0	0	1	62	0	64	0	5.7	0	148	0	0	171	0	0.66	4.15	0	2.03	1	0.66	1	2.31	0	#NULL!	#NULL!	76.25	0	324	0	1	0
452	阚宝松	2017	2017-02-21	131995	64.6	37.7	26.9	1.40149	#NULL!		#NULL!	UA	2020-10-11	单支，左前降	1	0	0	1	0	0	1	68	1	69	0	6.8	0	137	0	0	188	0	0.85	3.42	0	2.17	1	0.85	1	1.58	0	7	0	61.2	0	367.2	0	1	1
455	吴利群	2017	2017-02-21	120809	70.6	39.8	30.8	1.29221	2017-11-20	UA	#NULL!	UA	#NULL!	双支，左回旋、右冠	0	1	0	1	0	0	0	64	0	69	0	7.2	0	124	0	1	302	0	1.15	4.43	0	1.7	1	1.15	0	2.51	0	5	0	74.5	0	391.8	0	0	1
457	袁杰	2017	2017-02-14	134250	64.5	40.4	24.1	1.67635	#NULL!		#NULL!	UA	2020-10-11	单支，左回旋	1	0	0	1	0	0	1	43	0	#NULL!	#NULL!	5.38	0	140	0	0	16	0	1.64	4.19	0	1.51	0	1.64	0	1.86	0	14	0	66.5	0	394.1	0	0	1
458	田庆玉	2017	2017-02-17	134759	70.7	36.6	34.1	1.07331	#NULL!		#NULL!	UA	2020-10-11	双支，左回旋、中间	0	1	0	1	0	0	1	57	0	67	0	9.43	0	138	0	0	196	0	0.51	4.17	0	3.18	1	0.51	1	2.21	0	#NULL!	#NULL!	73.82	0	410	0	1	1
460	姜文春	2017	2017-02-11	117631	63.9	33.5	30.4	1.10197	#NULL!		#NULL!	UA	2020-10-11	单支，左主干	1	0	0	1	0	0	1	65	0	63	0	7.65	0	169	0	0	133	0	0.84	3.09	0	1.04	0	0.84	1	1.78	0	22	1	64.2	0	392	0	0	0
461	吴国明	2017	2017-02-21	135239	78.7	46.4	32.3	1.43653	#NULL!		#NULL!	UA	2020-10-11	单支，左前降	1	0	0	1	0	0	1	37	0	55	0	10.29	1	143	0	0	276	0	1.2	5.91	1	2.2	1	1.2	0	3.71	1	8	0	61	0	429.4	0	1	1
462	杜宏	2017	2017-02-21	135234	71.6	42.8	28.8	1.48611	#NULL!		#NULL!	UA	2020-10-11	三支	0	0	1	1	0	0	1	48	0	62	0	9.95	1	176	0	0	220	0	1.16	3.98	0	2.14	1	1.16	0	1.85	0	3	0	90.4	0	247.3	0	1	1
464	闫国民	2017	2017-02-15	134429	67.5	39.9	27.6	1.44565	#NULL!		#NULL!	UA	2020-10-11	多支，左主干、左前降、左回旋、右冠	0	0	1	1	0	0	1	61	0	#NULL!	#NULL!	6	0	115	0	1	19	0	1.22	4.06	0	1.62	0	1.22	0	2.1	0	14	0	63	0	357.1	0	0	1
469	高永强	2017	2017-02-28	58246	57.8	33.6	24.2	1.38843	2017-05-31	UA	1	UA	#NULL!	双支，左前降、右冠	0	1	0	1	0	0	1	54	0	59	0	7.05	0	154	0	0	207	0	0.83	3.34	0	1.07	0	0.83	1	2.02	0	7	0	78.4	0	271.1	0	0	1
470	刘秀新	2017	2017-02-27	70127	71.6	41.1	30.5	1.34754	2018-04-09	UA	#NULL!	UA	#NULL!	双支，左前降、右冠	0	1	0	1	0	0	1	57	0	55	0	7.79	0	140	0	0	183	0	1.12	4.24	0	3.32	1	1.12	0	1.61	0	8	0	50.5	0	386.6	0	1	1
471	尹淑珍	2017	2017-03-01	136217	80.7	44.3	36.4	1.21703	#NULL!		#NULL!	UA	2020-10-15	双支，左前降、左回旋	0	1	0	1	0	0	0	54	0	#NULL!	#NULL!	5.97	0	123	0	1	262	0	1.16	5.02	0	2.66	1	1.16	0	2.82	0	9.81	0	52.4	0	181.51	0	1	1
472	李桂芝	2017	2017-02-27	136007	68.8	34.3	34.5	0.994203	#NULL!		#NULL!	UA	2020-10-10	双支，左前降、右冠	0	1	0	1	0	0	0	49	0	66	0	7.51	0	164	0	0	247	0	1.07	5.55	1	5.24	1	1.07	0	2.1	0	8	0	65.9	0	294.1	0	1	1
473	赵珍	2017	2017-02-28	136087	66.8	37.1	29.7	1.24916	#NULL!		#NULL!	UA	2020-10-11	双支，左前降、右冠	0	1	0	1	0	0	1	62	0	#NULL!	#NULL!	5.1	0	149	0	0	118	0	1.34	4.41	0	0.7	0	1.34	0	2.75	0	14	0	87.9	0	311.2	0	0	0
475	孙宝瑞	2017	2017-02-22	135361	67.1	40.8	26.3	1.55133	2018-02-08	房颤	#NULL!	UA	2020-10-11	双支，左回旋、右冠	0	1	0	1	0	0	1	65	0	57	0	6.45	0	126	0	1	229	0	1.27	4.23	0	1.65	0	1.27	0	2.1	0	#NULL!	#NULL!	58.7	0	259.2	0	0	1
477	池玉环	2017	2017-03-02	136372	72.6	41.9	30.7	1.36482	#NULL!		#NULL!	UA	2020-10-15	双支，左前降、左回旋	0	1	0	1	0	0	0	57	0	#NULL!	#NULL!	7.49	0	153	0	0	26	0	1.2	3.9	0	1.61	0	1.2	0	2	0	24.39	1	79.9	0	223.63	0	1	1
479	郭振江	2017	2017-03-07	137021	73.1	46.7	26.4	1.76894	#NULL!		#NULL!	UA	2020-10-11	双支，左前降、右冠	0	1	0	1	0	0	1	52	0	64	0	6.31	0	126	0	1	163	0	1.01	4.24	0	4.53	1	1.01	0	1.17	0	5	0	84.1	0	373.3	0	1	0
480	刘善维	2017	2017-03-06	136790	60.2	40.9	19.3	2.11917	#NULL!		#NULL!	UA	2020-10-11	单支，左前降	1	0	0	1	0	0	1	61	0	66	0	5.18	0	140	0	0	183	0	1.11	3.19	0	0.64	0	1.11	0	1.74	0	10	0	77.64	0	340	0	0	0
481	董海库	2017	2017-03-02	132607	64.1	36.3	27.8	1.30576	2017-06-26	UA	1	UA	#NULL!	单支，左前降	1	0	0	1	0	0	1	46	0	#NULL!	#NULL!	7.9	0	125	0	1	268	0	1.19	2.59	0	0.93	0	1.19	0	0.98	0	#NULL!	#NULL!	66.5	0	390.7	0	0	0
483	王义	2017	2017-03-06	136821	71	39	32	1.21875	#NULL!		#NULL!	UA	2020-10-11	单支，左前降	1	0	0	1	0	0	1	57	0	62	0	7.15	0	149	0	0	256	0	0.8	5.3	1	1.74	1	0.8	1	3.36	0	#NULL!	#NULL!	70.4	0	495.9	0	1	1
485	李怀保	2017	2017-03-07	137030	71.9	41.7	30.2	1.38079	#NULL!		#NULL!	UA	2020-10-11	单支，左前降	1	0	0	1	0	0	1	48	0	57	0	7.57	0	146	0	0	200	0	0.97	4.43	0	3.23	1	0.97	1	1.99	0	8	0	67.26	0	288.1	0	1	1
487	徐振福	2017	2017-03-13	137798	77	42.5	34.5	1.23188	#NULL!		#NULL!	UA	2020-10-11	双核，左前降、左回旋	0	1	0	1	0	0	1	61	0	58	0	8.65	0	138	0	0	194	0	1	3.44	0	1.53	0	1	0	1.74	0	6	0	46.9	0	308.5	0	0	1
488	冯和平	2017	2017-03-13	111499	79.1	46	33.1	1.38973	#NULL!		#NULL!	UA	2020-10-10	双支，左回旋、右冠	0	1	0	1	0	0	0	70	1	59	0	6.77	0	131	0	0	372	0	1.04	4.21	0	1.64	0	1.04	0	2.42	0	26	1	101	0	247.2	0	1	1
490	董万明	2017	2017-03-12	137661	75.4	45.1	30.3	1.48845	#NULL!		#NULL!	UA	2020-10-11	单支，右冠	1	0	0	1	0	0	1	59	0	65	0	8.98	0	149	0	0	266	0	0.84	3.13	0	1.37	0	0.84	1	1.67	0	10	0	86.5	0	338.2	0	0	1
493	董玉春	2017	2017-03-11	137623	79.8	46.1	33.7	1.36795	#NULL!		#NULL!	UA	2020-10-11	三支	0	0	1	1	0	0	1	52	0	59	0	5.8	0	144	0	0	205	0	0.85	5.76	1	5.48	1	0.85	1	2.42	0	9	0	92.7	0	311.5	0	1	1
497	王绍文	2017	2017-03-19	138676	73.9	41.3	32.6	1.26687	2017-04-20	UA	#NULL!	UA	#NULL!	三支	0	0	1	1	0	0	1	68	1	68	0	7.21	0	142	0	0	154	0	0.74	2.25	0	1.16	0	0.74	1	0.98	0	28	1	72.15	0	301.8	0	1	0
498	刘军	2017	2017-03-20	138840	75	48.1	26.9	1.7881	#NULL!		#NULL!	UA	2020-10-11	双支，左前降、右冠	0	1	0	1	0	0	1	46	0	61	0	6.8	0	149	0	0	263	0	0.93	2.51	0	1.1	0	0.93	1	1.15	0	#NULL!	#NULL!	121.8	1	340.9	0	0	1
499	郭宗辉	2017	2017-03-14	138015	66.9	36.6	30.3	1.20792	#NULL!		#NULL!	UA	2020-10-11	双支，左前降、右冠	0	1	0	1	0	0	1	63	0	61	0	6.99	0	148	0	0	207	0	0.99	4.66	0	2.62	1	0.99	1	2.48	0	#NULL!	#NULL!	77.1	0	304.9	0	1	1
502	魏成安	2017	2017-03-17	138493	65.4	40.2	25.2	1.59524	2017-08-30	心律失常	#NULL!	UA	2020-10-11	单支，左回旋	1	0	0	1	0	0	1	67	1	58	0	8.37	0	156	0	0	214	0	1.14	3.46	0	0.84	0	1.14	0	1.77	0	#NULL!	#NULL!	78.5	0	247.9	0	0	0
510	李祥珍	2017	2017-03-20	450	71.6	42.3	29.3	1.44369	#NULL!		#NULL!	UA	2020-10-11	双支，左前降、右冠	0	1	0	1	0	0	1	62	0	46	0	11.2	1	131	0	0	190	0	1.14	3.62	0	0.91	0	1.14	0	1.89	0	28	1	58.1	0	397.1	0	0	1
511	冯秀云	2017	2017-03-27	139661	72.7	40.5	32.2	1.25776	#NULL!		#NULL!	UA	2020-10-10	三支	0	0	1	1	0	0	0	61	0	62	0	8.57	0	138	0	0	230	0	1.45	4.15	0	1.65	0	1.45	0	1.95	0	4	0	53.3	0	264.7	0	1	1
515	张桂华	2017	2017-03-29	140143	69.7	37	32.7	1.1315	#NULL!		#NULL!	UA	2020-10-10	双支，左前降、中间支	0	1	0	1	0	0	0	49	0	67	0	5.65	0	163	0	0	179	0	1.3	4.33	0	0.8	0	1.3	0	2.67	0	7	0	57.5	0	305.9	0	1	1
517	邹新江	2017	2017-04-05	9258	65.4	36.2	29.2	1.23973	#NULL!		#NULL!	UA	2020-10-12	单支，左前降	1	0	0	1	0	0	1	43	0	65	0	4.52	0	150	0	0	125	0	1.34	3.23	0	0.85	0	1.34	0	1.5	0	#NULL!	#NULL!	71.4	0	306.1	0	0	0
518	李国华	2017	2017-04-05	27198	73	42.6	30.4	1.40132	2017-04-05	UA	1	UA	#NULL!	双支，左前降、左回旋	0	1	0	1	0	0	1	45	0	69	0	6.3	0	134	0	0	154	0	0.78	3.15	0	1.1	0	0.78	1	1.84	0	#NULL!	#NULL!	58.6	0	289.5	0	1	0
519	王会云	2017	2017-04-05	140888	59.5	32.8	26.7	1.22846	#NULL!		#NULL!	UA	2020-10-12	单支，左前降	1	0	0	1	0	0	1	60	0	60	0	6.19	0	128	0	1	224	0	1.39	2.71	0	0.74	0	1.39	0	0.98	0	#NULL!	#NULL!	61.3	0	230.7	0	0	0
520	刘士仁	2017	2017-04-04	140700	56.1	36.9	19.2	1.92188	#NULL!		#NULL!	UA	2020-10-12	单支，左前降	1	0	0	1	0	0	1	71	1	52	0	3.59	0	154	0	0	136	0	1.28	3.62	0	0.69	0	1.28	0	2.11	0	#NULL!	#NULL!	58.3	0	228.9	0	0	0
525	王凌岩	2017	2017-04-11	141711	68.5	43.6	24.9	1.751	#NULL!		#NULL!	UA	2020-10-12	双支，左回旋、左前降	0	1	0	1	0	0	1	54	0	#NULL!	#NULL!	4.95	0	160	0	0	27	0	0.83	3.26	0	1.18	0	0.83	1	1.49	0	#NULL!	#NULL!	69.6	0	246.2	0	0	1
526	杨建轩	2017	2017-04-05	141001	74.6	41.3	33.3	1.24024	#NULL!		#NULL!	UA	2020-10-12	单支，左前降	1	0	0	1	0	0	1	52	0	66	0	5.52	0	165	0	0	297	0	1.1	4.62	0	1.16	0	1.1	0	2.99	0	10	0	54.6	0	281.2	0	0	0
529	傅振和	2017	2017-04-11	141816	75.1	41.2	33.9	1.21534	#NULL!		#NULL!	UA	2020-10-12	单支，左主干-左前降支	1	0	0	1	0	0	1	74	1	58	0	7.89	0	147	0	0	250	0	1.05	3.57	0	3.92	1	1.05	0	0.74	0	14	0	87.9	0	420.2	0	1	1
530	赵凤如	2017	2017-04-10	141642	79.9	43.8	36.1	1.2133	#NULL!		#NULL!	UA	2020-10-12	单支，左前降	1	0	0	1	0	0	1	61	0	61	0	8.31	0	148	0	0	325	0	0.98	2.53	0	0.87	0	0.98	1	1.15	0	18	1	71.4	0	384.6	0	0	1
532	刘贵	2017	2017-04-14	142197	72.1	42.8	29.3	1.46075	#NULL!		#NULL!	UA	2020-10-12	单支，左前降	1	0	0	1	0	0	1	67	1	69	0	5.84	0	179	0	0	236	0	1.32	3.88	0	1.48	0	1.32	0	1.89	0	13	0	78.8	0	295.9	0	0	1
536	范国彬	2017	2017-04-21	143089	73.9	42.3	31.6	1.33861	2018-06-26	UA	#NULL!	UA	#NULL!	双支，左前降、右冠	0	1	0	1	0	0	1	68	1	65	0	4.87	0	163	0	0	165	0	1.15	4.9	0	1.25	0	1.15	0	3.18	0	7	0	70.1	0	326.4	0	0	1
541	王春雨	2017	2017-04-30	144209	71.3	39.3	32	1.22812	#NULL!		#NULL!	UA	2020-10-12	三支	0	0	1	1	0	0	1	47	0	64	0	6.79	0	137	0	0	268	0	1.16	5.54	1	0.56	0	1.16	0	4.13	1	9	0	94.4	0	318.7	0	1	0
542	董金枝	2017	2017-04-25	143595	77.9	40.4	37.5	1.07733	#NULL!		#NULL!	UA	2020-10-11	单支，左前降	1	0	0	1	0	0	0	57	0	57	0	9.11	0	150	0	0	330	0	1.23	4.71	0	1.49	0	1.23	0	2.8	0	17	1	53.14	0	540.7	1	0	1
543	张悦勇	2017	2017-04-26	143777	78	42.6	35.4	1.20339	#NULL!		#NULL!	UA	2020-10-12	双支，左前降、右冠	0	1	0	1	0	0	1	52	0	71	0	5.87	0	162	0	0	231	0	1.24	4.3	0	1.09	0	1.24	0	2.56	0	18	1	71.6	0	242.3	0	0	1
544	于景芝	2017	2017-05-05	144883	73.4	44.5	28.9	1.53979	#NULL!		#NULL!	UA	2020-10-12	单支，左前降	1	0	0	1	0	0	1	62	0	65	0	7.93	0	146	0	0	226	0	1.76	3.81	0	0.92	0	1.76	0	1.63	0	6	0	59.4	0	384.7	0	0	0
548	王树春	2017	2017-04-24	143513	73.2	42.8	30.4	1.40789	#NULL!		#NULL!	UA	2020-10-11	三支	0	0	1	1	0	0	0	62	0	66	0	6.18	0	148	0	0	297	0	0.84	4.26	0	3.71	1	0.84	1	1.73	0	7	0	65.4	0	388	0	1	1
549	王艳民	2017	2017-05-09	145472	73.2	43.3	29.9	1.44816	2017-05-21	UA	#NULL!	UA	#NULL!	双支，左前降、左回旋	0	1	0	1	0	0	1	52	0	60	0	4.9	0	160	0	0	174	0	1.39	3.99	0	0.77	0	1.39	0	2.25	0	11	0	64	0	260.6	0	0	1
550	陈克明	2017	2017-05-05	556	75	44.8	30.2	1.48344	2017-05-05	UA	1	UA	#NULL!	双支，左前降、左回旋	0	1	0	1	0	0	1	51	0	49	0	14.39	1	120	0	1	263	0	1.07	5.44	1	1.37	0	1.07	0	3.78	1	#NULL!	#NULL!	57.2	0	274	0	1	1
551	丁桂芹	2017	2017-05-05	65719	72	37.8	34.2	1.10526	#NULL!		#NULL!	UA	2020-10-11	双支，左前降、左回旋	0	1	0	1	0	0	0	61	0	72	0	7.1	0	148	0	0	225	0	1.26	5.16	0	1.4	0	1.26	0	3.26	0	12	0	63.4	0	29.7	0	1	1
552	郭亚雄	2017	2017-05-04	144761	76.5	45	31.5	1.42857	2018-05-08	UA	1	UA	#NULL!	三支	0	0	1	1	0	0	1	51	0	58	0	4.82	0	113	0	1	240	0	1.12	4.97	0	1.23	0	1.12	0	3.29	0	3	0	51.3	0	420.5	0	0	1
554	陈桂荣	2017	2017-05-03	144708	73.1	38.9	34.2	1.13743	#NULL!		#NULL!	UA	2020-10-11	三支	0	0	1	1	0	0	0	76	1	67	0	7.12	0	116	0	1	364	1	0.99	5	0	2.58	1	0.99	1	2.84	0	364	1	42	0	247.1	0	1	1
555	邸小利	2017	2017-04-27	143898	67.2	39.7	27.5	1.44364	#NULL!		#NULL!	UA	2020-10-11	双支，左前降、右冠	0	1	0	1	0	0	0	67	1	64	0	5.73	0	152	0	0	245	0	1	3.62	0	2.75	1	1	0	2.03	0	14	0	49.7	0	211	0	0	1
556	李军	2017	2017-05-05	144886	72.4	41	31.4	1.30573	2019-03-01	UA	#NULL!	UA	#NULL!	双支，左前降、右冠	0	1	0	1	0	0	1	54	0	54	0	8.1	0	135	0	0	291	0	1.63	6.73	1	1.65	0	1.63	0	4.35	1	8	0	95.2	0	298.1	0	1	0
562	范海银	2017	2017-05-18	146763	79.1	42.7	36.4	1.17308	2018-07-03	UA	#NULL!	UA	#NULL!	单支，左前降	1	0	0	1	0	0	1	54	0	#NULL!	#NULL!	4.25	0	106	1	1	175	0	0.91	3.8	0	0.92	0	0.91	1	2.47	0	6	0	71.9	0	332.1	0	0	0
564	任振刚	2017	2017-05-08	145371	75.3	42.6	32.7	1.30275	#NULL!		#NULL!	UA	2020-10-16	双支，左前降、左回旋	0	1	0	1	0	0	1	48	0	73	0	10.47	1	116	1	1	282	0	0.61	5.16	0	5.93	1	0.61	1	1.85	0	5	0	59.1	0	379	0	1	1
566	赵淑芝	2017	2017-05-12	90938	64.8	37.8	27	1.4	2017-10-13	UA	#NULL!	UA	2020-10-11	三支	0	0	1	1	0	0	0	78	1	68	0	6.3	0	136	0	0	158	0	1.34	5.1	0	0.52	0	1.34	0	2.96	0	186	1	61.4	0	261.2	0	0	1
574	刘桂荣	2017	2017-05-22	36882	65.6	36.6	29	1.26207	#NULL!		#NULL!	UA	2020-10-11	双支，左前降、右冠	0	1	0	1	0	0	0	71	1	65	0	8.9	0	120	0	1	272	0	0.86	3.9	0	1.49	0	0.86	1	2.28	0	17	1	51.8	0	226.1	0	1	1
575	范希琴	2017	2017-05-17	146679	76.3	41.8	34.5	1.21159	2018-01-03	UA	1	UA	2020-10-11	三支	0	0	1	1	0	0	0	59	0	61	0	5.97	0	140	0	0	179	0	1.09	4.73	0	1.9	1	1.09	0	2.72	0	15	0	64	0	285.3	0	1	1
580	王桂芹	2017	2017-05-23	147417	80.4	43.1	37.3	1.1555	2018-03-02	UA	1	UA	2020-10-11	三支	0	0	1	1	0	0	0	64	0	60	0	7.79	0	133	0	0	244	0	1.07	5.05	0	2.37	1	1.07	0	2.95	0	26	1	74.8	0	326	0	1	1
582	繆云虎	2017	2017-05-31	148378	68.9	39.9	29	1.37586	2017-11-06	UA	0	UA	#NULL!	三支	0	0	1	1	0	0	1	57	0	59	0	10.25	1	138	0	0	168	0	0.71	5.31	1	5.93	1	0.71	1	1.9	0	10	0	53.7	0	439.1	0	1	0
583	高玉芬	2017	2017-05-15	146228	68.5	41.6	26.9	1.54647	#NULL!		#NULL!	UA	2020-10-11	三支	0	0	1	1	0	0	0	56	0	66	0	9.13	0	151	0	0	283	0	1.21	5.17	0	1.83	1	1.21	0	2.64	0	27	1	61.86	0	345	0	1	1
584	肖凤岐	2017	2017-06-01	143688	72	41.1	30.9	1.3301	#NULL!		#NULL!	UA	2020-10-12	双支，左回旋支、右冠状动脉	0	1	0	1	0	0	1	68	1	65	0	8.77	0	150	0	0	266	0	0.81	3.41	0	0.95	0	0.81	1	2.17	0	5	0	63.1	0	394.1	0	1	1
585	李如柏	2017	2017-05-30	19822	72.9	42.1	30.8	1.36688	#NULL!		#NULL!	UA	2020-10-12	三支	0	0	1	1	0	0	1	38	0	59	0	5.49	0	150	0	0	284	0	0.74	4.91	0	5.27	1	0.74	1	1.77	0	6	0	69.4	0	313.9	0	1	1
586	王海泉	2017	2017-05-31	148255	75.9	42.2	33.7	1.25223	#NULL!		#NULL!	UA	2020-10-12	三支	0	0	1	1	0	0	1	68	1	66	0	6.23	0	151	0	0	143	0	0.59	3.74	0	5.93	1	0.59	1	0.45	0	7	0	49.95	0	354.3	0	1	1
587	刘景云	2017	2017-05-22	147312	65.2	37.1	28.1	1.32028	#NULL!		#NULL!	UA	2020-10-14	左主干+双支，左回旋支、右冠状动脉	0	0	1	1	0	0	0	71	1	37	1	7.93	0	151	0	0	229	0	1.06	3.19	0	0.57	0	1.06	0	1.65	0	10.44	0	66.1	0	284.7	0	0	1
588	康宝贵	2017	2016-10-25	120840	73.7	39.8	33.9	1.17404	2017-05-31	UA	1	UA	#NULL!	双支，左前降支、左回旋支	0	1	0	1	0	0	1	70	1	65	0	7.8	0	125	0	1	223	0	1.06	4	0	1.89	1	1.06	0	2.08	0	7	0	61.2	0	338.3	0	1	0
589	祁云俊	2017	2017-05-24	147575	69.7	37.5	32.2	1.1646	#NULL!		#NULL!	UA	2020-10-12	三支	0	0	1	1	0	0	1	68	1	64	0	4.53	0	145	0	0	209	0	2.34	5.38	1	0.5	0	2.34	0	2.81	0	11	0	62.3	0	276.8	0	1	0
595	李桂芝	2017	2017-06-05	147755	81.2	45.4	35.8	1.26816	#NULL!		#NULL!	UA	2020-10-14	单支，左前降支	1	0	0	1	0	0	0	53	0	54	0	7.84	0	134	0	0	266	0	0.95	5.38	1	1.84	1	0.95	1	3.36	0	12.67	0	63.18	0	307	0	1	0
598	杨淑云	2017	2017-06-06	142650	79.4	43.6	35.8	1.21788	#NULL!		#NULL!	UA	2020-10-18	三支	0	0	1	1	0	0	0	48	0	#NULL!	#NULL!	7.2	0	113	1	1	4	0	1.18	5.3	1	3.28	1	1.18	0	2.97	0	564.16	1	61.3	0	287.37	0	1	1
599	尤瑞林	2017	2017-05-31	148284	63.4	37.2	26.2	1.41985	#NULL!		#NULL!	UA	2020-10-12	三支	0	0	1	1	0	0	1	49	0	44	0	5.28	0	174	0	0	164	0	0.69	4.99	0	1.94	1	0.69	1	3.42	1	13	0	62.9	0	304.7	0	1	0
601	张文忠	2017	2017-06-10	149731	65.5	37.2	28.3	1.31449	#NULL!		#NULL!	UA	2020-10-12	双支，左前降支、左回旋支	0	1	0	1	0	0	1	72	1	63	0	7.72	0	145	0	0	171	0	0.74	3.68	0	1.23	0	0.74	1	2.38	0	8	0	58.2	0	272.8	0	1	0
603	刘彬	2017	2017-06-09	35453	63.4	39.6	23.8	1.66387	#NULL!		#NULL!	UA	2020-10-11	单支，左前降支	1	0	0	1	0	0	0	57	0	64	0	6.13	0	155	0	0	198	0	1.14	4.3	0	1.61	0	1.14	0	2.43	0	#NULL!	#NULL!	76.3	0	255.4	0	0	0
606	高国富	2017	2017-06-12	134097	74	38.2	35.8	1.06704	#NULL!		#NULL!	UA	2020-10-12	三支	0	0	1	1	0	0	1	64	0	62	0	6.15	0	162	0	0	195	0	0.98	4.61	0	1.51	0	0.98	1	2.94	0	19	1	87.6	0	438.7	0	0	1
613	袁凤梅	2017	2017-06-10	101458	67.5	39.1	28.4	1.37676	#NULL!		#NULL!	UA	2020-10-11	双支，左前降支、右冠状动脉	0	1	0	1	0	0	0	55	0	58	0	8.47	0	175	0	0	242	0	1.55	4.28	0	0.88	0	1.55	0	2.33	0	10	0	74	0	281.5	0	1	1
614	刘晓明	2017	2017-06-17	150683	76.5	44.3	32.2	1.37578	2018-01-17	UA	#NULL!	UA	#NULL!	三支	0	0	1	1	0	0	1	51	0	66	0	8.69	0	151	0	0	224	0	0.69	4.57	0	3.62	1	0.69	1	2.23	0	8	0	95.7	0	569.4	0	1	0
615	郭祥岐	2017	2017-06-19	150884	66.3	40.2	26.1	1.54023	#NULL!		#NULL!	UA	2020-10-12	单支，左前降	1	0	0	1	0	0	1	70	1	57	0	6.61	0	116	0	1	162	0	1.07	3.67	0	1.06	0	1.07	0	1.7	0	#NULL!	#NULL!	51	0	390.6	0	0	1
616	王凤云	2017	2017-06-17	150671	75.7	40.8	34.9	1.16905	2018-09-26	UA	#NULL!	UA	#NULL!	三支	0	0	1	1	0	0	0	55	0	56	0	9.25	0	150	0	0	257	0	1.15	4.89	0	1.1	0	1.15	0	3.4	1	13	0	79.2	0	302	0	1	1
621	陈万忠	2017	2017-06-21	151279	72	43.7	28.3	1.54417	#NULL!		#NULL!	UA	2020-10-12	双支，左回旋、右冠	0	1	0	1	0	0	1	57	0	64	0	4.19	0	135	0	0	173	0	0.73	4.14	0	1.62	0	0.73	1	2.28	0	20	1	44.3	0	367	0	1	0
622	王淑杰	2017	2017-06-26	151808	79.6	45.5	34.1	1.33431	2018-01-08	UA	#NULL!	UA	#NULL!	三支	0	0	1	1	0	0	0	69	1	63	0	6.66	0	149	0	0	290	0	1	3.76	0	3.19	1	1	0	1.31	0	8	0	50.9	0	188	0	0	1
623	宋广林	2017	2017-06-26	151714	66.4	38.5	27.9	1.37993	#NULL!		#NULL!	UA	2020-10-12	单支，右冠状动脉	1	0	0	1	0	0	1	61	0	66	0	7.73	0	157	0	0	173	0	1.4	5.79	1	1.59	0	1.4	0	3.67	1	7	0	66.86	0	344	0	1	0
624	李向生	2017	2017-06-26	151747	78.9	46.4	32.5	1.42769	#NULL!		#NULL!	UA	2020-10-12	三支	0	0	1	1	0	0	1	59	0	59	0	7.81	0	135	0	0	198	0	0.86	2.71	0	1.62	0	0.86	1	1.11	0	19	1	70.5	0	371	0	0	1
625	刘长利	2017	2017-06-23	151516	56.4	33.3	23.1	1.44156	#NULL!		#NULL!	UA	2020-10-12	双支，左前降、左回旋	0	1	0	1	0	0	1	64	0	64	0	8.2	0	157	0	0	190	0	0.81	3.26	0	1.35	0	0.81	1	1.84	0	#NULL!	#NULL!	68.5	0	252.4	0	1	0
626	任鹏	2017	2017-06-27	151966	72.4	42.7	29.7	1.43771	#NULL!		#NULL!	UA	2020-10-12	三支	0	0	1	1	0	0	1	61	0	47	0	5.6	0	120	0	1	149	0	0.82	4.45	0	4.92	1	0.82	1	1.39	0	16	0	49.2	0	341.2	0	1	1
627	杨翠平	2017	2017-06-22	151393	69.2	40.7	28.5	1.42807	#NULL!		#NULL!	UA	2020-10-11	三支	0	0	1	1	0	0	0	57	0	70	0	7.48	0	156	0	0	297	0	0.62	5.87	1	5.93	1	0.62	1	2.55	0	110	1	48.1	0	253.4	0	1	0
630	王志	2017	2017-07-04	152955	69.9	41.6	28.3	1.46996	#NULL!		#NULL!	UA	2020-10-12	单支，左前降	1	0	0	1	0	0	1	52	0	75	0	9.53	1	143	0	0	152	0	1.4	3.64	0	2.09	1	1.4	0	1.28	0	12	0	65.4	0	381.6	0	1	1
633	耿庆生	2017	2017-07-06	153214	77.8	43.9	33.9	1.29499	#NULL!		#NULL!	UA	2020-10-12	三支	0	0	1	1	0	0	1	65	0	61	0	5.39	0	127	0	1	217	0	1.27	3.19	0	0.9	0	1.27	0	1.45	0	6	0	73	0	414.6	0	0	1
634	王莘增	2017	2017-07-06	153280	77.3	43.1	34.2	1.26023	#NULL!		#NULL!	UA	2020-10-12	单支，右冠状动脉	1	0	0	1	0	0	1	65	0	#NULL!	#NULL!	5.11	0	140	0	0	262	0	1.7	5.02	0	1.67	0	1.7	0	2.49	0	8	0	52.4	0	293.4	0	0	0
635	于春茹	2017	2017-07-03	152660	74.7	42.5	32.2	1.31988	2017-11-24	UA	#NULL!	UA	#NULL!	单支，左前降	1	0	0	1	0	0	0	61	0	60	0	5.39	0	135	0	0	209	0	1.33	4.49	0	0.85	0	1.33	0	2.77	0	14	0	77	0	379.1	0	1	1
642	白素云	2017	2017-07-18	154981	70	38.2	31.8	1.20126	#NULL!		#NULL!	UA	2020-10-15	三支	0	0	1	1	0	0	0	69	1	#NULL!	#NULL!	9.49	0	172	0	0	342	0	1.03	2.89	0	1.14	0	1.03	0	1.37	0	14.96	0	88.1	0	208.9	0	1	1
645	管凤云	2017	2017-07-17	154599	73.9	43	30.9	1.39159	#NULL!		#NULL!	UA	2020-10-14	三支	0	0	1	1	0	0	0	57	0	41	0	6.23	0	150	0	0	240	0	1.18	3.94	0	0.72	0	1.18	0	2.14	0	14.34	0	81.75	0	230.9	0	1	1
646	朱亮	2017	2017-07-11	31405	73	43.7	29.3	1.49147	#NULL!		#NULL!	UA	2020-10-12	单支，右冠状动脉	1	0	0	1	0	0	1	56	0	61	0	9.9	1	152	0	0	268	0	0.84	3.47	0	1.94	1	0.84	1	1.91	0	6	0	96.1	0	427.1	0	1	1
647	宋永胜	2017	2017-07-10	153695	68.7	43.3	25.4	1.70472	2017-07-28	UA	#NULL!	UA	#NULL!	三支	0	0	1	1	0	0	1	43	0	#NULL!	#NULL!	6.4	0	131	0	0	212	0	0.88	3.82	0	2.26	1	0.88	1	2.13	0	11	0	72.5	0	346.3	0	1	0
656	冯果芹	2017	2017-07-25	155845	75.9	43.5	32.4	1.34259	#NULL!		#NULL!	UA	2020-10-11	双支，左前降、右冠	0	1	0	1	0	0	0	66	1	69	0	9.18	0	142	0	0	286	0	1.21	4.97	0	1.37	0	1.21	0	3.14	0	4	0	94.1	0	234.9	0	1	1
657	刘金仓	2017	2017-07-19	155080	74.1	41.5	32.6	1.27301	#NULL!		#NULL!	UA	2020-10-12	双支，左前降、右冠	0	1	0	1	0	0	1	78	1	66	0	6.69	0	125	0	1	207	0	1.23	3.27	0	0.91	0	1.23	0	1.54	0	5	0	40.94	0	306.6	0	0	1
658	王素华	2017	2017-07-25	155883	64.8	36.1	28.7	1.25784	2017-11-18	UA	#NULL!	UA	#NULL!	单支，左前降	1	0	0	1	0	0	0	57	0	65	0	6.19	0	144	0	0	183	0	1.1	5.58	1	4.57	1	1.1	0	2.4	0	11	0	74	0	282.2	0	1	1
659	赖兆刚	2017	2017-07-24	155805	79	43.3	35.7	1.21289	#NULL!		#NULL!	UA	2020-10-12	单支，左回旋支	1	0	0	1	0	0	1	45	0	58	0	7	0	158	0	0	230	0	0.79	3.77	0	2.61	1	0.79	1	2.12	0	11	0	64.1	0	378.1	0	1	0
660	张国祥	2017	2017-07-24	155658	78.5	44	34.5	1.27536	#NULL!		#NULL!	UA	2020-10-12	单支，左前降	1	0	0	1	0	0	1	66	1	61	0	7.43	0	145	0	0	289	0	1.15	4.08	0	1.74	1	1.15	0	2.17	0	10	0	66.1	0	371.7	0	1	0
662	刘占群	2017	2017-07-24	155713	60.9	38.1	22.8	1.67105	#NULL!		#NULL!	UA	2020-10-12	三支	0	0	1	1	0	0	1	74	1	67	0	5.55	0	128	0	1	164	0	0.84	3.59	0	1.4	0	0.84	1	1.88	0	16	0	61.2	0	317	0	0	1
665	何付	2017	2017-07-28	156404	70.8	38.7	32.1	1.20561	#NULL!		#NULL!	UA	2020-10-12	单支，左前降	1	0	0	1	0	0	1	62	0	61	0	6.2	0	154	0	0	263	0	1.02	3.12	0	1.47	0	1.02	0	1.53	0	8	0	78.5	0	337.4	0	0	0
666	杨永生	2017	2017-07-28	156389	70.2	36.7	33.5	1.09552	#NULL!		#NULL!	UA	2020-10-12	双支，左前降、右冠	0	1	0	1	0	0	1	59	0	65	0	5.08	0	145	0	0	195	0	0.76	3.97	0	1.8	1	0.76	1	2.39	0	9	0	64.83	0	415	0	1	0
667	钱宝富	2017	2017-07-25	155884	78.3	43.2	35.1	1.23077	#NULL!		#NULL!	UA	2020-10-12	双支，左前降、左回旋	0	1	0	1	0	0	1	63	0	59	0	5.6	0	138	0	0	200	0	1.26	4.14	0	0.89	0	1.26	0	2.22	0	3	0	80.6	0	192.4	0	0	0
670	谭凤有	2017	2017-08-01	157053	75	43	32	1.34375	#NULL!		#NULL!	UA	2020-10-12	单支，左前降	1	0	0	1	0	0	1	57	0	70	0	4	0	154	0	0	161	0	1.4	5.21	1	0.94	0	1.4	0	2.95	0	7	0	99.5	0	505.9	0	1	1
673	张占昌	2017	2017-07-27	156288	63.9	37.7	26.2	1.43893	2018-10-26	7	#NULL!	UA	#NULL!	单支，左前降	1	0	0	1	0	0	1	65	0	57	0	8.2	0	140	0	0	248	0	1.04	4.89	0	3.68	1	1.04	0	2.71	0	11	0	99.6	0	278.3	0	1	0
675	李显增	2017	2017-07-28	156333	62.1	37	25.1	1.4741	2018-08-20	UA	#NULL!	UA	#NULL!	三支	0	0	1	1	0	0	1	71	1	61	0	4.85	0	135	0	0	180	0	1.19	3.95	0	1.17	0	1.19	0	2.09	0	8	0	84.2	0	322	0	0	1
676	王玉	2017	2017-08-02	48842	70.6	38.2	32.4	1.17901	#NULL!		#NULL!	UA	2020-10-12	双支，左前降、左回旋	0	1	0	1	0	0	1	71	1	60	0	4.8	0	136	0	0	163	0	1.49	3.25	0	0.59	0	1.49	0	1.35	0	8	0	74.4	0	406.6	0	0	0
682	潘柏义	2017	2017-08-09	157857	74	42.1	31.9	1.31975	#NULL!		#NULL!	UA	2020-10-12	单支，右冠状动脉	1	0	0	1	0	0	1	60	0	59	0	5.6	0	148	0	0	222	0	2.12	3.95	0	0.57	0	2.12	0	1.41	0	13	0	65.1	0	318.9	0	0	0
683	吕占全	2017	2017-08-02	157193	64.3	38.9	25.4	1.5315	#NULL!		#NULL!	UA	2020-10-12	单支，左前降	1	0	0	1	0	0	1	54	0	68	0	4.34	0	122	0	1	239	0	1.09	4.27	0	1.32	0	1.09	0	2.12	0	#NULL!	#NULL!	71.53	0	277.5	0	0	0
684	杨瑞兰	2017	2017-07-27	156202	79	39.7	39.3	1.01018	#NULL!		#NULL!	UA	2020-10-11	三支	0	0	1	1	0	0	0	69	1	67	0	6.8	0	154	0	0	221	0	0.72	4.45	0	2.9	1	0.72	1	2.21	0	#NULL!	#NULL!	65.9	0	267.8	0	1	0
691	刘德礼	2017	2017-08-08	55098	67	33.1	33.9	0.976401	2018-08-29	陈旧性心梗	#NULL!	UA	#NULL!	双支，左回旋、右冠	0	1	0	1	0	0	1	76	1	73	0	12.19	1	163	0	0	187	0	0.76	6.17	1	1.92	1	0.76	1	4.14	1	13	0	59.8	0	344.7	0	1	1
694	孙国英	2017	2017-08-09	158087	73.8	42.5	31.3	1.35783	#NULL!		#NULL!	UA	2020-10-11	双支，左前降、左回旋	0	1	0	1	0	0	0	56	0	68	0	4.46	0	133	0	0	213	0	1.07	5.28	1	3.32	1	1.07	0	2.7	0	27	1	40.4	0	173	0	0	1
695	徐艳侠	2017	2017-08-15	158844	78.1	44.8	33.3	1.34535	#NULL!		#NULL!	UA	2020-10-11	单支，左前降	1	0	0	1	0	0	0	50	0	64	0	6.31	0	125	0	1	246	0	1.35	6.89	1	2.73	1	1.35	0	4.3	1	9	0	40.4	0	238.9	0	0	1
696	张贵侠	2017	2017-08-11	158365	78.5	44.9	33.6	1.33631	2018-05-07	UA	#NULL!	UA	#NULL!	双支，左前降、左回旋	0	1	0	1	0	0	0	69	1	68	0	6.98	0	166	0	0	314	0	1.48	5.5	1	1.02	0	1.48	0	3.56	1	69	1	72.51	0	222.7	0	1	1
701	杜贺文	2017	2017-08-20	159471	63.4	35.1	28.3	1.24028	#NULL!		#NULL!	UA	2020-10-12	双支，左前降、右冠	0	1	0	1	0	0	1	65	0	64	0	7.77	0	153	0	0	265	0	0.84	3.68	0	0.64	0	0.84	1	2.21	0	8	0	88.53	0	291.2	0	0	0
705	张明山	2017	2017-08-22	159840	73	41.8	31.2	1.33974	2017-11-15	UA	#NULL!	UA	#NULL!	双支，左前降、左回旋	0	1	0	1	0	0	1	53	0	64	0	5.63	0	147	0	0	216	0	1	2.8	0	1.44	0	1	0	1.3	0	10	0	52.6	0	341.8	0	0	1
706	任利香	2017	2017-08-15	158824	83.9	45.1	38.8	1.16237	#NULL!		#NULL!	UA	2020-10-15	单支，左前降	1	0	0	1	0	0	0	63	0	#NULL!	#NULL!	6.58	0	160	0	0	177	0	0.83	2.63	0	1.36	0	0.83	1	1.3	0	7.87	0	83.9	0	211.27	0	0	1
717	雷长和	2017	2017-08-28	125548	72.5	42.3	30.2	1.40066	#NULL!		#NULL!	UA	2020-10-12	三支	0	0	1	1	0	0	1	53	0	60	0	6.74	0	141	0	0	209	0	0.81	2.91	0	1.48	0	0.81	1	1.53	0	16	0	69.1	0	335.6	0	1	1
725	朱广海	2017	2017-09-01	161207	69.9	40.9	29	1.41034	2017-09-20	UA	#NULL!	UA	#NULL!	双支，左前降支、左回旋支	0	1	0	1	0	0	1	51	0	49	0	5.62	0	160	0	0	232	0	1.35	5.55	1	1.64	0	1.35	0	3.2	0	7	0	113	1	316.3	0	0	0
726	孙德志	2017	2017-08-31	161090	69.1	40.5	28.6	1.41608	#NULL!		#NULL!	UA	2020-10-12	三支	0	0	1	1	0	0	1	57	0	#NULL!	#NULL!	5.72	0	140	0	0	216	0	0.74	3.38	0	2.09	1	0.74	1	1.57	0	#NULL!	#NULL!	57.5	0	615.5	0	1	1
727	董俊付	2017	2017-09-06	161780	65.3	41.5	23.8	1.7437	#NULL!		#NULL!	UA	2020-10-12	单支，左前降	1	0	0	1	0	0	1	49	0	62	0	5.56	0	158	0	0	303	0	0.98	4.22	0	0.75	0	0.98	1	2.52	0	3	0	81.2	0	289.1	0	0	0
728	杨学国	2017	2017-09-05	8462	64.9	36.7	28.2	1.30142	#NULL!		#NULL!	UA	2020-10-12	三支	0	0	1	1	0	0	1	70	1	48	0	6.67	0	139	0	0	103	0	1.17	4.04	0	0.79	0	1.17	0	2.22	0	3	0	69.63	0	360.6	0	0	1
730	梁国生	2018	2018-01-02	176813	76.6	43.8	32.8	1.33537	2018-07-30	无症状性心肌缺血	1	无症状性心肌缺血	2020-10-12	三支	0	0	1	1	0	0	1	53	0	68	0	6.3	0	134	0	0	239	0	1.47	6.03	1	2.72	1	1.47	0	3.38	0	11	0	88.2	0	514	0	1	0
733	张井轩	2018	2018-01-02	176844	68.3	43.8	24.5	1.78776	#NULL!		#NULL!	UA	2020-10-12	双支，左前降、左回旋	0	1	0	1	0	0	1	62	0	39	1	4.61	0	141	0	0	182	0	1.1	7.08	1	1.67	0	1.1	0	4.62	1	12	0	58.4	0	200	0	1	1
735	秦永盛	2018	2018-01-03	177130	69.7	44.7	25	1.788	#NULL!		#NULL!	UA	2020-10-12	双支，左前降、左回旋	0	1	0	1	0	0	1	46	0	66	0	7.51	0	155	0	0	239	0	0.88	5.52	1	3.41	1	0.88	1	3.37	0	7	0	64	0	386.2	0	1	1
736	刘伟	2018	2018-01-02	176840	73.4	43.5	29.9	1.45485	#NULL!		#NULL!	UA	2020-10-12	双支，左前降左回旋	0	1	0	1	0	0	1	52	0	70	0	8.5	0	150	0	0	214	0	1.11	4.16	0	2.29	1	1.11	0	2.21	0	7	0	56.7	0	390	0	1	1
737	徐忠	2018	2018-01-04	177255	70.7	45	25.7	1.75097	#NULL!		#NULL!	UA	2020-10-12	三支	0	0	1	1	0	0	1	61	0	64	0	6.6	0	148	0	0	224	0	1.12	5.38	1	2.93	1	1.12	0	3.12	0	10	0	63.5	0	456.7	0	1	1
743	谷景林	2018	2018-01-08	177769	71.4	42.7	28.7	1.4878	#NULL!		#NULL!	UA	2020-10-12	双支，左前降、左回旋	0	1	0	1	0	0	1	80	1	71	0	5.27	0	150	0	0	154	0	0.96	3.37	0	0.62	0	0.96	1	1.87	0	6	0	66	0	264	0	0	0
744	张淑芹	2018	2018-01-09	178024	74.2	46.1	28.1	1.64057	#NULL!		#NULL!	UA	2020-10-14	单支，左前降	1	0	0	1	0	0	0	61	0	54	0	7.31	0	131	0	0	209	0	0.96	3.1	0	2.03	1	0.96	1	1.51	0	19.78	1	56	0	389	0	1	1
747	张建明	2018	2018-01-10	178178	75.2	42.5	32.7	1.29969	#NULL!		#NULL!	UA	2020-10-12	单支，左前降	1	0	0	1	0	0	1	53	0	65	0	5.75	0	135	0	0	285	0	1.29	5.34	1	1.79	1	1.29	0	3.06	0	10	0	77.1	0	372	0	1	0
749	赵海丰	2018	2018-01-10	178233	66	42.1	23.9	1.76151	2019-01-16	UA	#NULL!	UA	#NULL!	双支，左前降、左回旋	0	1	0	1	0	0	1	72	1	68	0	4.84	0	157	0	0	207	0	1.31	3.44	0	0.59	0	1.31	0	1.65	0	6	0	70.7	0	383.6	0	0	1
750	李亚军	2018	2018-01-11	178351	77.9	50.3	27.6	1.82246	#NULL!		#NULL!	UA	2020-10-13	三支	0	0	1	1	0	0	1	43	0	65	0	4.63	0	155	0	0	260	0	1.31	4.96	0	1.39	0	1.31	0	2.78	0	18	1	60.4	0	350.7	0	0	0
755	胡宝山	2018	2018-01-15	178774	70.7	40.4	30.3	1.33333	#NULL!		#NULL!	UA	2020-10-13	三支	0	0	1	1	0	0	1	73	1	64	0	4.75	0	144	0	0	179	0	1.41	5.46	1	0.9	0	1.41	0	2.76	0	#NULL!	#NULL!	71	0	376.1	0	0	0
758	孙谨言	2018	2018-01-15	1613	81.4	45.7	35.7	1.28011	#NULL!		#NULL!	UA	2020-10-13	三支	0	0	1	1	0	0	1	64	0	54	0	5.78	0	132	0	0	224	0	1.14	3.75	0	0.88	0	1.14	0	2	0	11	0	57.8	0	382	0	0	1
763	孙小杰	2018	2018-01-22	179738	74.5	45.7	28.8	1.58681	#NULL!		#NULL!	UA	2020-10-13	单支，左前降	1	0	0	1	0	0	1	53	0	#NULL!	#NULL!	11.67	1	144	0	0	248	0	0.7	3.15	0	1.53	0	0.7	1	1.81	0	6	0	76	0	362	0	1	0
765	韩伟	2018	2018-01-22	4138561	71.4	47	24.4	1.92623	2019-04-22	UA	#NULL!	UA	#NULL!	三支	0	0	1	1	0	0	1	60	0	#NULL!	#NULL!	5.21	0	135	0	0	239	0	0.85	5.93	1	4.05	1	0.85	1	3.66	1	3	0	66.5	0	236.8	0	1	1
767	付金荣	2018	2018-01-24	180168	72.3	43.7	28.6	1.52797	#NULL!		#NULL!	UA	2020-10-14	三支	0	0	1	1	0	0	0	66	1	54	0	7.26	0	160	0	0	232	0	1.4	4.64	0	1.81	1	1.4	0	2.41	0	11.03	0	56	0	334	0	1	0
768	王玉侠	2018	2018-01-24	180144	77.3	46.7	30.6	1.52614	#NULL!		#NULL!	UA	2020-10-15	双支，左回旋、右冠	0	1	0	1	0	0	0	59	0	#NULL!	#NULL!	7.48	0	138	0	0	253	0	1.54	6.64	1	1.59	0	1.54	0	3.92	1	12.71	0	47.9	0	268.46	0	0	1
769	梁淑华	2018	2018-01-25	180318	79.4	43.4	36	1.20556	#NULL!		#NULL!	UA	2020-10-12	双支，左前降、右冠	0	1	0	1	0	0	0	61	0	74	0	5.74	0	149	0	0	279	0	1.11	2.96	0	1.87	1	1.11	0	1	0	21	1	48.9	0	249.4	0	1	1
777	王素霞	2018	2018-01-29	180781	64.17	37.81	26.36	1.43437	#NULL!		#NULL!	UA	2020-10-14	单支，左前降	1	0	0	1	0	0	0	55	0	50	0	3.54	0	148	0	0	177	0	0.89	4.39	0	5.27	1	0.89	1	2.27	0	13.77	0	76.07	0	238.6	0	0	1
778	韩树峰	2018	2018-01-31	181113	65.65	42.68	22.97	1.85808	2018-08-01	UA	#NULL!	UA	#NULL!	单支，左前降	1	0	0	1	0	0	1	57	0	57	0	7.46	0	153	0	0	189	0	1.33	4.07	0	1.3	0	1.33	0	2.06	0	10.18	0	46.97	0	322.2	0	0	1
779	韩世荣	2018	2018-01-26	146692	74	46.8	27.2	1.72059	#NULL!		#NULL!	UA	2020-10-14	三支	0	0	1	1	0	0	0	69	1	50	0	8.45	0	152	0	0	258	0	1.13	4.19	0	3.25	1	1.13	0	2.12	0	15.17	0	54.9	0	192.8	0	0	1
780	于桂平	2018	2018-01-30	181000	70.83	42.5	28.33	1.50018	#NULL!		#NULL!	UA	2020-10-12	双支，左前降、右冠	0	1	0	1	0	0	0	52	0	63	0	6.9	0	136	0	0	270	0	0.93	2.7	0	1.15	0	0.93	1	0.99	0	11	0	77.66	0	238	0	1	1
781	刘启来	2018	2018-01-30	181024	69.03	41.85	27.18	1.53974	#NULL!		#NULL!	UA	2020-10-13	三支	0	0	1	1	0	0	1	57	0	#NULL!	#NULL!	7.24	0	143	0	0	268	0	0.73	3.7	0	1.98	1	0.73	1	2.18	0	2.7	0	67.72	0	369.4	0	1	1
782	杨松岩	2018	2018-01-31	181102	66.87	42.71	24.16	1.7678	2018-06-24	上消化道出血（双抗）	#NULL!	UA	2020-10-13	单支，左回旋	1	0	0	1	0	0	1	49	0	56	0	6.1	0	137	0	0	232	0	1.5	3.77	0	0.49	0	1.5	0	1.77	0	6.81	0	48.4	0	312.9	0	0	1
784	孙现华	2018	2018-01-26	175684	73.95	46.85	27.1	1.72878	#NULL!		#NULL!	UA	2020-10-13	双支，左前降、右冠	0	1	0	1	0	0	1	48	0	54	0	9.8	1	129	0	1	148	0	1	4.1	0	3.24	1	1	0	2.16	0	7	0	47.1	0	272.9	0	1	0
785	姜秀芝	2018	2018-01-23	180040	76.3	46.8	29.5	1.58644	#NULL!		#NULL!	UA	2020-10-12	单支，左前降	1	0	0	1	0	0	0	66	1	67	0	5.86	0	156	0	0	202	0	1.26	4.24	0	0.82	0	1.26	0	2.61	0	200	1	60	0	143.7	0	1	1
792	崔建忠	2018	2018-02-05	181631	75.46	48.07	27.39	1.75502	#NULL!		#NULL!	UA	2020-10-13	双支，左前降、左回旋	0	1	0	1	0	0	1	55	0	57	0	6	0	140	0	0	223	0	1.22	5.49	1	2.16	1	1.22	0	3.2	0	3.86	0	862	1	359.4	0	1	1
797	王得文	2018	2018-02-06	181929	78.9	51.2	27.7	1.84838	#NULL!		#NULL!	UA	2020-10-13	三支	0	0	1	1	0	0	1	60	0	66	0	14.39	1	139	0	0	267	0	2.08	7.53	1	1.34	0	2.08	0	3.73	1	21	1	89	0	277	0	1	1
798	熊宝信	2018	2018-02-08	182089	82.7	44.5	38.2	1.16492	#NULL!		#NULL!	UA	2020-10-13	三支	0	0	1	1	0	0	1	72	1	60	0	5.35	0	110	0	1	187	0	1.06	4.43	0	1	0	1.06	0	2.6	0	7.41	0	92.52	0	138	0	0	1
801	刘蒙成	2018	2018-02-05	181669	62.5	38.9	23.6	1.64831	#NULL!		#NULL!	UA	2020-10-13	双支，左前降、左回旋	0	1	0	1	0	0	1	69	1	#NULL!	#NULL!	4.51	0	159	0	0	23	0	1.05	4.75	0	1.38	0	1.05	0	2.82	0	2.7	0	65	0	275	0	0	0
802	穆建国	2018	2018-02-05	181686	68.4	43.5	24.9	1.74699	#NULL!		#NULL!	UA	2020-10-13	双支，左前降、右冠	0	1	0	1	0	0	1	57	0	60	0	5.91	0	166	0	0	288	0	1.21	3.65	0	1.45	0	1.21	0	1.81	0	9.35	0	68.74	0	302	0	0	0
803	谭起	2018	2018-02-05	173594	73.62	42.77	30.85	1.38639	#NULL!		#NULL!	UA	2020-10-13	双支，左前降、左回旋	0	1	0	1	0	0	1	75	1	57	0	6.97	0	180	0	0	201	0	1.14	4.46	0	3.87	1	1.14	0	2.27	0	12.54	0	71.86	0	273.2	0	1	1
804	冯俊山	2018	2018-02-05	181791	73.19	45.69	27.5	1.66145	#NULL!		#NULL!	UA	2020-10-13	双支，左前降、右冠	0	1	0	1	0	0	1	65	0	73	0	11.46	1	150	0	0	234	0	1.36	4.14	0	2.63	1	1.36	0	1.96	0	19.29	1	69.16	0	436.9	0	1	1
805	齐井海	2018	2018-02-05	181645	73.29	44.66	28.63	1.5599	#NULL!		#NULL!	UA	2020-10-13	双支，左前降、右冠	0	1	0	1	0	0	1	66	1	51	0	7.2	0	150	0	0	169	0	1.32	3.15	0	0.54	0	1.32	0	1.41	0	8.93	0	49.2	0	312.7	0	0	1
806	屈素荣	2018	2018-02-01	181356	75.5	47.3	28.2	1.6773	#NULL!		#NULL!	UA	2020-10-12	双支，左前降、右冠	0	1	0	1	0	0	0	60	0	57	0	9.82	1	144	0	0	236	0	1.61	4.44	0	1.06	0	1.61	0	2.35	0	10	0	73.35	0	222.4	0	1	1
808	彭树堂	2018	2018-01-29	180867	67.81	46.33	21.48	2.15689	#NULL!		#NULL!	UA	2020-10-13	双支，左前降、右冠	0	1	0	1	0	0	1	46	0	#NULL!	#NULL!	8.12	0	137	0	0	22	0	1.39	4.21	0	4.45	1	1.39	0	1.81	0	2.7	0	71.71	0	366	0	1	1
824	张忠民	2018	2018-02-16	182576	68.37	40.5	27.87	1.45318	2018-03-14	UA、房颤	#NULL!	UA	#NULL!	双支，左前、右冠	0	1	0	1	0	0	1	65	0	#NULL!	#NULL!	7.24	0	149	0	0	25	0	1.07	3.39	0	1.53	0	1.07	0	1.7	0	7.46	0	70.9	0	288.1	0	0	0
827	任明	2018	2018-02-18	182717	78.71	44.41	34.3	1.29475	#NULL!		#NULL!	UA	2020-10-13	单支，右冠	1	0	0	1	0	0	1	61	0	64	0	5.72	0	132	0	0	237	0	1.52	3.95	0	0.29	0	1.52	0	1.92	0	19.22	1	57.75	0	370.8	0	0	1
834	王海波	2018	2018-02-22	183206	80.2	48.47	31.73	1.52758	#NULL!		#NULL!	UA	2020-10-13	双支，左前降、右冠	0	1	0	1	0	0	1	46	0	62	0	7.35	0	175	0	0	215	0	1.31	5.17	0	0.88	0	1.31	0	2.8	0	#NULL!	#NULL!	82	0	217	0	0	1
836	梁春民	2018	2018-02-23	183400	64.17	39.15	25.02	1.56475	#NULL!		#NULL!	UA	2020-10-13	单支，左前降	1	0	0	1	0	0	1	53	0	57	0	9.67	1	157	0	0	127	0	0.76	2.96	0	0.67	0	0.76	1	1.69	0	2.7	0	94.13	0	271	0	1	1
839	李占民	2018	2016-07-14	109151	61	40.7	20.3	2.00493	2018-02-24	UA	1	UA	#NULL!	双支，左前降、左回旋	0	1	0	1	0	0	1	52	0	#NULL!	#NULL!	6.56	0	151	0	0	162	0	0.97	2.77	0	0.76	0	0.97	1	1.47	0	9.4	0	66.6	0	437.2	0	0	0
845	王树才	2018	2018-02-25	183769	73.19	42.13	31.06	1.35641	2018-03-19	UA	1	UA	#NULL!	三支	0	0	1	1	0	0	1	55	0	#NULL!	#NULL!	6.67	0	142	0	0	292	0	1.02	4.23	0	1.22	0	1.02	0	2.45	0	12.29	0	69.08	0	505.6	0	0	1
849	梁起堂	2018	2014-11-18	45210	65.7	39.8	25.9	1.53668	2018-02-23	UA	1	UA	#NULL!	双支，左前降、左回旋	0	1	0	1	0	0	1	62	0	49	0	5.33	0	158	0	0	176	0	1.53	4.73	0	0.95	0	1.53	0	2.77	0	13	0	67.26	0	390.6	0	0	0
851	盖春	2018	2018-02-25	183798	72.25	43.35	28.9	1.5	#NULL!		#NULL!	UA	2020-10-13	双支，左前降、右冠	0	1	0	1	0	0	1	49	0	#NULL!	#NULL!	6.47	0	169	0	0	217	0	#NULL!	#NULL!	0	#NULL!	0	#NULL!	1	#NULL!	0	#NULL!	#NULL!	72.74	0	386.1	0	0	0
852	张立民	2018	2018-02-22	183169	77.51	45.96	31.55	1.45674	#NULL!		#NULL!	UA	2020-10-13	双支，左前降、左回旋	0	1	0	1	0	0	1	59	0	#NULL!	#NULL!	4.83	0	150	0	0	163	0	2.19	5.26	1	0.69	0	2.19	0	2.39	0	9.76	0	84.46	0	316.3	0	1	1
853	杨井龙	2018	2018-02-27	146869	71.73	43.66	28.07	1.5554	#NULL!		#NULL!	UA	2020-10-13	双支，左前降、左回旋	0	1	0	1	0	0	1	63	0	63	0	4.3	0	141	0	0	156	0	1.11	4.04	0	1.24	0	1.11	0	2.22	0	7.51	0	55	0	285.1	0	0	0
854	佟桂林	2018	2018-02-28	184361	73.9	43.2	30.7	1.40717	#NULL!		#NULL!	UA	2020-10-13	单支，左前降	1	0	0	1	0	0	1	58	0	64	0	5.63	0	153	0	0	186	0	1.31	3.74	0	1.03	0	1.31	0	1.84	0	4.81	0	50.09	0	402	0	0	0
855	马文礼	2018	2018-02-28	184321	74.25	47.16	27.09	1.74086	2018-08-15	UA	#NULL!	UA	#NULL!	三支	0	0	1	1	0	0	1	61	0	#NULL!	#NULL!	6.16	0	146	0	0	189	0	1.27	4.17	0	3.06	1	1.27	0	2.01	0	9.94	0	75.64	0	246.2	0	1	1
857	李富山	2018	2018-02-26	125415	74.32	46.53	27.79	1.67434	#NULL!		#NULL!	UA	2020-10-13	三支	0	0	1	1	0	0	1	66	1	#NULL!	#NULL!	5.98	0	170	0	0	199	0	1.39	5.1	0	1	0	1.39	0	2.87	0	15.19	0	142.21	1	304.7	0	0	0
865	温秀枝	2018	2018-03-05	184991	80.22	46.23	33.99	1.36011	#NULL!		#NULL!	UA	2020-10-12	单支，左前降	1	0	0	1	0	0	0	58	0	66	0	7.79	0	136	0	0	214	0	1.19	5.92	1	1.56	0	1.19	0	4.02	1	8	0	59.2	0	351.1	0	0	0
866	魏秀荣	2018	2018-03-05	184988	83.6	48.37	35.23	1.37298	#NULL!		#NULL!	UA	2020-10-12	三支	0	0	1	1	0	0	0	53	0	68	0	6.59	0	142	0	0	257	0	0.89	5.72	1	5.93	1	0.89	1	2.13	0	3	0	76.01	0	336.5	0	1	0
867	王凤全	2018	2018-03-06	185211	80.13	45.77	34.36	1.33207	#NULL!		#NULL!	UA	2020-10-13	单支，左前降	1	0	0	1	0	0	1	51	0	61	0	4.5	0	119	0	1	269	0	1.19	5.88	1	0.63	0	1.19	0	3.69	1	7.14	0	82.9	0	268.2	0	1	1
868	李友英	2018	2018-03-05	175631	79.74	43.53	36.21	1.20215	#NULL!		#NULL!	UA	2020-10-12	双支，左前降、右冠	0	1	0	1	0	0	0	78	1	61	0	8.19	0	150	0	0	199	0	1.21	3.77	0	1.63	0	1.21	0	1.82	0	5	0	67	0	318.3	0	1	1
869	张亚南	2018	2018-02-22	33305	70.6	43.7	26.9	1.62454	2019-01-10	UA	#NULL!	UA	#NULL!	三支	0	0	1	1	0	0	1	83	1	64	0	7.7	0	162	0	0	201	1	0.95	2.93	0	1.78	1	0.95	1	1.41	0	3.81	0	75.18	0	370	0	1	0
871	杨文瑞	2018	2018-03-07	124092	67.33	38.84	28.49	1.36329	#NULL!		#NULL!	UA	2020-10-13	三支	0	0	1	1	0	0	1	67	1	70	0	9.42	0	137	0	0	277	0	0.98	3.63	0	0.89	0	0.98	1	2.03	0	9.31	0	100.33	0	344.6	0	0	1
873	于伟宏	2018	2018-03-09	185704	72.01	45.79	26.22	1.74638	#NULL!		#NULL!	UA	2020-10-12	单支，右冠	1	0	0	1	0	0	0	41	0	68	0	6.79	0	157	0	0	232	0	1.13	5.19	0	4.69	1	1.13	0	1.93	0	14	0	65.46	0	187.3	0	1	1
876	王树明	2018	2018-03-08	185504	85.35	47.55	37.8	1.25794	#NULL!		#NULL!	UA	2020-10-13	三支	0	0	1	1	0	0	1	62	0	67	0	7.11	0	129	0	1	202	1	1.03	5.55	1	2.2	1	1.03	0	3.4	1	14.4	0	69.39	0	365.3	0	1	1
877	李国栋	2018	2018-03-10	185885	67.52	39.97	27.55	1.45082	#NULL!		#NULL!	UA	2020-10-13	三支	0	0	1	1	0	0	1	78	1	59	0	7.48	0	135	0	0	143	0	0.82	2.15	0	0.47	0	0.82	1	1.02	0	5.91	0	86.77	0	264.7	0	0	1
879	毛树桐	2018	2018-03-02	184646	83.53	44.33	39.2	1.13087	#NULL!		#NULL!	UA	2020-10-13	三支	0	0	1	1	0	0	1	54	0	#NULL!	#NULL!	8.3	0	162	0	0	275	0	1.86	5.34	1	2.14	1	1.86	0	2.57	0	10.91	0	58.76	0	405	0	1	1
884	赵素艳	2018	2017-06-05	186137	66.1	45.4	20.7	2.19324	#NULL!		#NULL!	UA	2020-10-12	三支	0	0	1	1	0	0	0	59	0	62	0	4.25	0	164	0	0	172	0	0.88	3.56	0	2.2	1	0.88	1	1.68	0	6	0	85.27	0	240.7	0	1	1
885	高国辉	2018	2018-03-12	186051	78.52	45.63	32.89	1.38735	#NULL!		#NULL!	UA	2020-10-13	单支，右冠	1	0	0	1	0	0	1	50	0	69	0	9.13	0	146	0	0	227	0	0.87	4.54	0	5.93	1	0.87	1	2.34	0	5.38	0	66.41	0	460	0	1	1
886	张治华	2018	2018-03-05	185053	82.19	48.12	34.07	1.41239	#NULL!		#NULL!	UA	2020-10-13	三支	0	0	1	1	0	0	1	66	1	64	0	5.12	0	115	0	1	186	0	1.26	6.04	1	2.42	1	1.26	0	3.58	1	9.03	0	59.37	0	390	0	1	0
887	谢淑媛	2018	2018-03-13	186315	77.09	43.11	33.98	1.26869	2018-10-13	UA	3	UA	#NULL!	三支	0	0	1	1	0	0	0	70	1	64	0	7.77	0	164	0	0	302	1	#NULL!	#NULL!	0	2.82	1	#NULL!	1	1.13	0	31	1	63.22	0	#NULL!	#NULL!	1	1
888	卜国祥	2018	2018-03-12	186096	72.67	44.46	28.21	1.57604	2018-04-16	UA	#NULL!	UA	#NULL!	双支，左前降、右冠	0	1	0	1	0	0	1	55	0	64	0	6.69	0	132	0	0	299	0	0.72	3.05	0	3.24	1	0.72	1	1.54	0	4.17	0	93	0	269.4	0	1	0
889	吴海峰	2018	2018-03-06	185306	68.2	40.2	28	1.43571	#NULL!		#NULL!	UA	2020-10-13	三支	0	0	1	1	0	0	1	69	1	69	0	5.4	0	165	0	0	148	0	1.34	2.53	0	1.94	1	1.34	0	0.76	0	4.66	0	71	0	337	0	1	1
890	张淑清	2018	2018-03-15	186684	68.6	40.7	27.9	1.45878	#NULL!		#NULL!	UA	2020-10-13	单支，左前降	1	0	0	1	0	0	1	56	0	60	0	6.67	0	130	0	0	192	0	1.31	4.35	0	2.56	1	1.31	0	2.18	0	10.82	0	44.79	0	406	0	1	0
896	刘保祥	2018	2018-03-19	187156	68.2	42.7	25.5	1.67451	#NULL!		#NULL!	UA	2020-10-13	单支，左回旋	1	0	0	1	0	0	1	50	0	#NULL!	#NULL!	4.22	0	143	0	0	194	0	0.88	3.12	0	0.81	0	0.88	1	1.71	0	13.31	0	62.51	0	302	0	0	1
898	王树才	2018	2018-02-25	183769	73.19	42.13	31.06	1.35641	2018-03-19	UA	1	UA	#NULL!	三支	0	0	1	1	0	0	1	55	0	#NULL!	#NULL!	6.67	0	141	0	0	292	0	1.02	4.23	0	1.22	0	1.02	0	2.45	0	12.29	0	87.47	0	505.6	0	0	1
899	孙国廷	2018	2018-03-21	187492	76.29	45.35	30.94	1.46574	2018-12-05	UA	#NULL!	UA	#NULL!	单支，左前降	1	0	0	1	0	0	1	61	0	51	0	7.4	0	133	0	0	159	0	1.37	4.13	0	1.52	0	1.37	0	2.06	0	9.21	0	40.2	0	533.1	1	0	1
901	孙广宗	2018	2018-03-22	187637	81.29	46.16	35.13	1.31398	#NULL!		#NULL!	UA	2020-10-13	多支，左前降、中间支、左回旋	0	0	1	1	0	0	1	51	0	64	0	7.13	0	168	0	0	206	1	1.52	8.4	1	5.93	1	1.52	0	4.91	1	18.65	1	55.75	0	397.5	0	1	1
905	陈志祥	2018	2018-03-26	188083	67.3	39.8	27.5	1.44727	#NULL!		#NULL!	UA	2020-10-13	单支，左前降	1	0	0	1	0	0	1	55	0	64	0	5.27	0	115	0	1	235	0	1.12	2.47	0	1.24	0	1.12	0	0.96	0	13.84	0	66.8	0	233	0	0	0
909	王振国	2018	2018-03-28	188507	69.1	43	26.1	1.64751	#NULL!		#NULL!	UA	2020-10-13	双支，左回旋、右冠	0	1	0	1	0	0	1	67	1	59	0	5.99	0	127	0	1	201	1	1.17	6.38	1	2.7	1	1.17	0	3.9	1	5.12	0	74.6	0	326	0	1	1
910	孙淑荣	2018	2018-03-28	85040	64.88	37.41	27.47	1.36185	2018-06-21	UA	#NULL!	UA	#NULL!	三支	0	0	1	1	0	0	0	61	0	62	0	5.3	0	137	0	0	222	0	0.91	5.38	1	2.9	1	0.91	1	3.15	0	10	0	63.6	0	405.5	0	1	1
913	刘振海	2018	2018-03-28	188476	69.14	39.6	29.54	1.34056	#NULL!		#NULL!	UA	2020-10-13	三支	0	0	1	1	0	0	1	51	0	55	0	7.6	0	143	0	0	192	0	0.96	5.14	0	2.72	1	0.96	1	3.07	0	11.35	0	76.68	0	242.2	0	1	0
916	李树文	2018	2018-04-02	189171	70.35	43.07	27.28	1.57881	#NULL!		#NULL!	UA	2020-10-13	双支，左回旋、右冠	0	1	0	1	0	0	1	56	0	67	0	6.96	0	160	0	0	242	0	0.87	3.72	0	2.2	1	0.87	1	2.06	0	13.17	0	59.1	0	330.1	0	1	0
917	李淑平	2018	2018-04-02	188966	64	36.93	27.07	1.36424	#NULL!		#NULL!	UA	2020-10-12	双支，左主干、左前降	0	1	0	1	0	0	0	61	0	59	0	5.18	0	132	0	0	157	0	0.74	3.84	0	1.76	1	0.74	1	2.3	0	11	0	63.65	0	304	0	0	0
924	张秀岭	2018	2018-04-07	189648	64.77	36.78	27.99	1.31404	#NULL!		#NULL!	UA	2020-10-13	三支	0	0	1	1	0	0	1	63	0	57	0	5.46	0	160	0	0	58	0	0.98	3.48	0	1.31	0	0.98	1	1.87	0	9.67	0	58.52	0	377	0	0	1
929	王贺先	2018	2018-04-04	189435	75.2	42.2	33	1.27879	2018-07-09	UA	#NULL!	UA	#NULL!	三支	0	0	1	1	0	0	0	55	0	63	0	5.9	0	161	0	0	259	0	1.3	3.82	0	0.87	0	1.3	0	2.12	0	14	0	65	0	292.7	0	1	1
930	张少杰	2018	2018-04-04	189362	71.8	44.7	27.1	1.64945	#NULL!		#NULL!	UA	2020-10-13	单支，右冠	1	0	0	1	0	0	1	52	0	56	0	4.21	0	153	0	0	176	0	1.77	4.14	0	4.21	1	1.77	0	1.48	0	3.98	0	72.2	0	380	0	1	0
932	冯金贵	2018	2018-04-12	190475	66.27	36.84	29.43	1.25178	#NULL!		#NULL!	UA	2020-10-13	单支，左回旋	1	0	0	1	0	0	1	77	1	68	0	6.52	0	143	0	0	208	1	0.96	3.28	0	1.43	0	0.96	1	1.71	0	13.49	0	83.06	0	339	0	0	1
933	张伟民	2018	2018-04-09	190026	74.28	40.81	33.47	1.2193	#NULL!		#NULL!	UA	2020-10-13	三支	0	0	1	1	0	0	1	66	1	64	0	6.2	0	140	0	0	237	0	0.96	3.91	0	1.99	1	0.96	1	2.16	0	9.19	0	63.43	0	320.5	0	1	0
939	张延付	2018	2018-04-12	190539	70.39	38.68	31.71	1.2198	#NULL!		#NULL!	UA	2020-10-13	三支	0	0	1	1	0	0	1	77	1	67	0	5.49	0	135	0	0	220	1	0.71	3.75	0	4.3	1	0.71	1	2	0	9.17	0	58.13	0	347.5	0	1	0
941	武乃一	2018	2018-04-14	186373	57.18	32.9	24.28	1.35502	#NULL!		#NULL!	UA	2020-10-13	单支，左前降	1	0	0	1	0	0	1	61	0	63	0	3.29	0	161	0	0	119	0	1.01	2.61	0	1.62	0	1.01	0	1.12	0	19.87	1	51.26	0	573.2	1	0	0
944	何淑匣	2018	2018-04-16	190887	63.04	39.97	23.07	1.73255	#NULL!		#NULL!	UA	2020-10-15	单支，左前降	1	0	0	1	0	0	0	47	0	#NULL!	#NULL!	5.14	0	141	0	0	211	0	1.04	3.71	0	1.15	0	1.04	0	2.02	0	14.83	0	50.8	0	245.16	0	1	1
946	闫相伍	2018	2018-04-17	191197	61.6	38.2	23.4	1.63248	2018-09-29	UA	1	UA	#NULL!	双支，左前降、右冠	0	1	0	1	0	0	1	57	0	60	0	6.99	0	124	0	1	176	0	0.99	2.79	0	1.87	1	0.99	1	1.25	0	10.83	0	69.11	0	346	0	1	1
947	王长城	2018	2018-04-17	159792	64.15	37.47	26.68	1.40442	2018-06-22	UA	#NULL!	UA	#NULL!	单支，左前降	1	0	0	1	0	0	1	67	1	61	0	4.25	0	152	0	0	140	1	0.93	2.55	0	0.87	0	0.93	1	1.21	0	7.02	0	55.15	0	315.4	0	0	0
953	张玉常	2018	2018-04-20	191601	75.4	43.92	31.48	1.39517	#NULL!		#NULL!	UA	2020-10-13	单支，左回旋	1	0	0	1	0	0	1	55	0	68	0	4.83	0	176	0	0	136	0	1.1	3.6	0	0.94	0	1.1	0	1.91	0	18.95	1	75	0	293.6	0	0	1
957	杨术义	2018	2018-04-24	192109	68.89	42.21	26.68	1.58208	#NULL!		#NULL!	UA	2020-10-13	双支，左前降、右冠	0	1	0	1	0	0	1	62	0	57	0	5.45	0	138	0	0	162	0	1.07	2.6	0	1.01	0	1.07	0	1.12	0	24.23	1	46.1	0	348.6	0	0	0
958	杨玉慧	2018	2018-04-12	76262	76.94	44.18	32.76	1.3486	#NULL!		#NULL!	UA	2020-10-12	三支	0	0	1	1	0	0	0	66	1	70	0	4.83	0	157	0	0	156	0	1.29	4.41	0	0.42	0	1.29	0	3	0	18	1	67.18	0	147.7	0	1	1
960	孟庆慧	2018	2017-10-17	82333	75.5	40.1	35.4	1.13277	2018-04-24	UA	1	UA	2020-10-13	双支，左前降、右冠	0	1	0	1	0	0	1	67	1	57	0	9.26	0	180	0	0	256	0	1.08	3.44	0	2.55	1	1.08	0	1.63	0	5	0	75.85	0	274	0	1	1
961	李振忠	2018	2018-04-24	192150	77.17	46.76	30.41	1.53765	#NULL!		#NULL!	UA	2020-10-13	单支，左前降	1	0	0	1	0	0	1	38	0	#NULL!	#NULL!	7.82	0	163	0	0	286	0	0.72	4.45	0	4.72	1	0.72	1	2.51	0	20.86	1	65.37	0	337.8	0	1	1
965	宋彩琴	2018	2018-04-25	192363	75.41	42.25	33.16	1.27413	#NULL!		#NULL!	UA	2020-10-18	双支，左前降、左回旋	0	1	0	1	0	0	0	68	1	#NULL!	#NULL!	5.71	0	128	0	1	187	0	1.16	4.73	0	0.61	0	1.16	0	2.8	0	33.04	1	52.78	0	239.07	0	1	1
966	孟兆莲	2018	2018-04-25	189805	69	42.53	26.47	1.60672	#NULL!		#NULL!	UA	2020-10-12	单支，左前降	1	0	0	1	0	0	0	60	0	56	0	4.54	0	147	0	0	203	1	1.19	5.27	1	3.82	1	1.19	0	2.33	0	6	0	97.3	0	339.8	0	0	1
967	王淑芬	2018	2018-04-27	192540	68.9	40.8	28.1	1.45196	#NULL!		#NULL!	UA	2020-10-12	双支，左前降、左回旋	0	1	0	1	0	0	0	50	0	67	0	5.16	0	177	0	0	294	0	1.11	4.02	0	0.86	0	1.11	0	2.24	0	11	0	74.58	0	435.7	0	0	1
974	宋海荣	2018	2018-04-23	192006	85.48	48.05	37.43	1.28373	#NULL!		#NULL!	UA	2020-10-14	单支，左主干、左前降	1	0	0	1	0	0	0	50	0	41	0	8.19	0	173	0	0	240	1	0.8	3.54	0	0.81	0	0.8	1	2.11	0	82.46	1	65.11	0	286.8	0	1	1
975	宋立占	2018	2018-04-28	41875	63.49	37.19	26.3	1.41407	#NULL!		#NULL!	UA	2020-10-13	三支	0	0	1	1	0	0	1	55	0	61	0	8.18	0	150	0	0	230	1	1.1	5.04	0	1.21	0	1.1	0	3.03	0	10.4	0	92.01	0	272.3	0	0	0
977	郭秀荣	2018	2018-04-23	152009	85.69	48.79	36.9	1.32222	#NULL!		#NULL!	UA	2020-10-12	双支，左回旋、右冠	0	1	0	1	0	0	0	76	1	63	0	5.34	0	153	0	0	247	0	0.86	3.1	0	1.98	1	0.86	1	1.59	0	12	0	68.52	0	216.6	0	1	1
980	杜武	2018	2018-05-02	193109	70.75	40.05	30.7	1.30456	#NULL!		#NULL!	UA	2020-10-13	单支，右冠	1	0	0	1	0	0	1	61	0	#NULL!	#NULL!	6.31	0	134	0	0	218	0	1.1	5.06	0	3.27	1	1.1	0	2.84	0	5.68	0	59	0	288.9	0	1	0
982	王玉宝	2018	2018-05-02	193014	75.85	45.76	30.09	1.52077	#NULL!		#NULL!	UA	2020-10-13	三支	0	0	1	1	0	0	1	52	0	40	0	6	0	132	0	0	115	0	1.12	4.65	0	0.83	0	1.12	0	2.74	0	10.95	0	81.7	0	439.4	0	0	1
983	王玉馥	2018	2018-05-02	115152	71.46	40.68	30.78	1.32164	#NULL!		#NULL!	UA	2020-10-12	三支	0	0	1	1	0	0	0	73	1	61	0	6.76	0	145	0	0	248	0	1.39	4.5	0	3.68	1	1.39	0	2.12	0	10	0	59.95	0	456.7	0	1	1
985	李国刚	2018	2018-05-04	193504	71.95	41.62	30.33	1.37224	#NULL!		#NULL!	UA	2020-10-13	双支，左前降、左回旋	0	1	0	1	0	0	1	58	0	53	0	7.48	0	153	0	0	216	0	1.18	3.96	0	2.03	1	1.18	0	2.02	0	12.15	0	74.49	0	358	0	1	1
991	徐长国	2018	2018-05-02	193170	68.02	42.45	25.57	1.66015	#NULL!		#NULL!	UA	2020-10-13	单支，左回旋	1	0	0	1	0	0	1	62	0	66	0	6.51	0	165	0	0	179	0	0.94	3.66	0	3.3	1	0.94	1	1.85	0	6.7	0	58.73	0	204.5	0	1	1
995	丁淑枝	2018	2018-05-08	194168	75.8	42.8	33	1.29697	#NULL!		#NULL!	UA	2020-10-15	单支，左前降	1	0	0	1	0	0	0	55	0	#NULL!	#NULL!	7	0	147	0	0	328	0	0.96	3.68	0	2	1	0.96	1	1.98	0	20.69	1	80.66	0	325.16	0	0	1
996	冷雁滨	2018	2018-05-07	30119	67.58	42.24	25.34	1.66693	#NULL!		#NULL!	UA	2020-10-13	双支，左前降、右冠	0	1	0	1	0	0	1	69	1	73	0	5.79	0	135	0	0	214	0	1.04	5.05	0	2.39	1	1.04	0	2.97	0	12.99	0	48.6	0	246.5	0	1	1
997	司凤兰	2018	2018-05-07	193892	77.08	44.52	32.56	1.36732	#NULL!		#NULL!	UA	2020-10-15	三支	0	0	1	1	0	0	0	73	1	#NULL!	#NULL!	5.42	0	175	0	0	28	0	1.18	4.82	0	0.94	0	1.18	0	2.82	0	219.46	1	69.46	0	192.95	0	1	1
1005	陈淑芬	2018	2018-05-14	50856	81.33	44.8	36.53	1.22639	2017-09-25	UA	#NULL!	UA	#NULL!	三支	0	0	1	1	0	0	0	68	1	58	0	6.59	0	157	0	0	229	0	0.68	3.98	0	2.83	1	0.68	1	2.36	0	11	0	102.1	0	316.5	0	1	1
1006	孙秀文	2018	2018-05-08	142413	68.1	42.6	25.5	1.67059	#NULL!		#NULL!	UA	2020-10-13	三支	0	0	1	1	0	0	1	61	0	53	0	6.62	0	150	0	0	175	0	1.16	3.94	0	1.24	0	1.16	0	1.82	0	12	0	70.38	0	429	0	0	1
1007	曾涛	2018	2018-05-04	157891	78.06	43.2	34.86	1.23924	#NULL!		#NULL!	UA	2020-10-13	三支	0	0	1	1	0	0	1	48	0	63	0	6.53	0	156	0	0	247	0	0.96	5.37	1	1.51	0	0.96	1	3.38	0	11.32	0	70.64	0	426.8	0	1	1
1008	钟利	2018	2018-05-17	195520	67.97	43.73	24.24	1.80404	#NULL!		#NULL!	UA	2020-10-13	双支，左回旋、左前降	0	1	0	1	0	0	1	48	0	68	0	8.18	0	167	0	0	221	0	1.29	5.53	1	3	1	1.29	0	3.09	0	13.05	0	101.69	0	425.4	0	1	0
1011	郑文润	2018	2018-05-22	196196	68.71	37.62	31.09	1.21004	#NULL!		#NULL!	UA	2020-10-14	三支	0	0	1	1	0	0	1	74	1	57	0	7.97	0	139	0	0	197	0	0.95	3.07	0	1.29	0	0.95	1	1.57	0	14.06	0	64.48	0	385.8	0	0	0
1013	周云飞	2018	2018-05-21	195930	76.13	43.28	32.85	1.3175	#NULL!		#NULL!	UA	2020-10-14	单支，左回旋	1	0	0	1	0	0	1	53	0	#NULL!	#NULL!	6.86	0	140	0	0	187	0	0.88	3.27	0	1.33	0	0.88	1	1.78	0	10.43	0	59.95	0	298.7	0	0	0
1014	王刚	2018	2015-01-07	27241	69.3	40.2	29.1	1.38144	2016-02-16	UA	#NULL!	UA	#NULL!	双支，左回旋、右冠	0	1	0	1	0	0	1	55	0	#NULL!	#NULL!	7.44	0	167	0	0	248	0	0.67	3.71	0	3.75	1	0.67	1	1.34	0	17	1	85	0	323.1	0	1	1
1015	代国才	2018	2018-05-17	195508	73.9	44.5	29.4	1.51361	#NULL!		#NULL!	UA	2020-10-14	双支，左回旋、右冠	0	1	0	1	0	0	1	65	0	63	0	8.5	0	132	0	0	191	0	1.35	4.17	0	1.28	0	1.35	0	2.13	0	12.37	0	62.66	0	363	0	0	0
1016	白立民	2018	2018-05-22	196103	70.05	43.53	26.52	1.6414	#NULL!		#NULL!	UA	2020-10-14	单支，右冠	1	0	0	1	0	0	1	49	0	59	0	4.75	0	158	0	0	180	1	1.13	4.11	0	1.09	0	1.13	0	2.28	0	19.14	1	91.51	0	166.8	0	0	0
1022	李玉福	2018	2018-05-28	196858	70.76	41.86	28.9	1.44844	#NULL!		#NULL!	UA	2020-10-14	三支	0	0	1	1	0	0	1	60	0	69	0	5.47	0	141	0	0	196	0	1.15	5	0	1.01	0	1.15	0	2.98	0	7.36	0	44.8	0	292.9	0	0	0
1023	张桂玲	2018	2018-03-27	188263	71.7	41	30.7	1.3355	#NULL!		#NULL!	UA	2020-10-12	单支，左前降	1	0	0	1	0	0	0	67	1	71	0	6.1	0	133	0	0	122	0	1.09	4.23	0	1.52	0	1.09	0	2.36	0	52	1	61.94	0	143.1	0	1	1
1024	高利山	2018	2018-05-22	78556	65.7	40.3	25.4	1.58661	#NULL!		#NULL!	UA	2020-10-14	单支，左回旋	1	0	0	1	0	0	1	60	0	68	0	7.25	0	147	0	0	252	0	0.94	4.79	0	2.26	1	0.94	1	2.85	0	13.79	0	43.4	0	344.4	0	1	0
1025	李玉芹	2018	2018-05-24	7623	72.2	39.88	32.32	1.23391	#NULL!		#NULL!	UA	2020-10-12	双支，左前降、右冠	0	1	0	1	0	0	0	75	1	63	0	5.89	0	150	0	0	204	1	1.04	4.42	0	2.44	1	1.04	0	2.46	0	6	0	80.92	0	387.6	0	1	0
1026	胡启树	2018	2018-04-19	191524	66.5	39.7	26.8	1.48134	#NULL!		#NULL!	UA	2020-10-14	单支，右冠	1	0	0	1	0	0	1	68	1	71	0	7.6	0	162	0	0	198	0	0.76	2.29	0	1.86	1	0.76	1	1.04	0	2.7	0	64	0	266.2	0	1	1
1027	汤作清	2018	2018-05-28	196915	71.3	45.1	26.2	1.72137	#NULL!		#NULL!	UA	2020-10-14	三支	0	0	1	1	0	0	1	71	1	61	0	4.97	0	130	0	0	173	0	1.17	4.77	0	1.13	0	1.17	0	2.77	0	18.36	1	55.82	0	403	0	0	1
1035	李生	2018	2018-06-01	197577	72.5	42.9	29.6	1.44932	#NULL!		#NULL!	UA	2020-10-14	双支，左前降、左回旋	0	1	0	1	0	0	1	65	0	62	0	7.32	0	167	0	0	176	0	1.13	3.07	0	0.71	0	1.13	0	1.48	0	21.55	1	69.99	0	218	0	0	1
1036	王志强	2018	2018-05-22	196104	77.13	44.54	32.59	1.36668	#NULL!		#NULL!	UA	2020-10-14	三支	0	0	1	1	0	0	1	57	0	66	0	9.5	0	148	0	0	152	0	1.29	8.08	1	5.48	1	1.29	0	4.88	1	17.17	1	68.32	0	297.3	0	1	1
1037	叶振利	2018	2018-05-31	197409	72.66	41.82	30.84	1.35603	2018-07-18	UA	#NULL!	UA	#NULL!	三支	0	0	1	1	0	0	1	72	1	59	0	5.88	0	158	0	0	213	0	1.03	3.9	0	1.14	0	1.03	0	2.18	0	15.58	0	73.75	0	304.4	0	0	1
1038	董文清	2018	2018-05-24	196454	68.2	40.1	28.1	1.42705	2018-12-12	UA	#NULL!	UA	#NULL!	三支	0	0	1	1	0	0	1	52	0	59	0	5.95	0	157	0	0	160	1	0.83	3.31	0	0.99	0	0.83	1	1.89	0	21.88	1	113.04	1	286.3	0	0	0
1040	宋庆林	2018	2018-06-06	198317	80.35	40.26	40.09	1.00424	#NULL!		#NULL!	UA	2020-10-14	三支	0	0	1	1	0	0	1	78	1	72	0	8.71	0	124	0	1	260	1	0.98	4.51	0	3.44	1	0.98	1	2.48	0	6.79	0	104.77	0	253.3	0	1	1
1043	卢凤利	2018	2018-06-11	198902	75.77	44.21	31.56	1.40082	#NULL!		#NULL!	UA	2020-10-14	双支，左回旋、左前降	0	1	0	1	0	0	1	57	0	#NULL!	#NULL!	6.3	0	161	0	0	235	0	1.88	3.72	0	0.99	0	1.88	0	1.37	0	12.98	0	123.74	1	335.8	0	0	0
1044	谢卫军	2018	2018-06-08	198609	73.69	42.09	31.6	1.33196	#NULL!		#NULL!	UA	2020-10-14	单支，左前降	1	0	0	1	0	0	1	56	0	62	0	8.41	0	131	0	0	217	0	0.84	3.46	0	2.32	1	0.84	1	1.86	0	10.78	0	63.3	0	377.6	0	1	1
1045	杨晓俊	2018	2018-06-09	195084	77.72	45.91	31.81	1.44326	#NULL!		#NULL!	UA	2020-10-12	双支，左前降、右冠	0	1	0	1	0	0	0	67	1	75	0	6.34	0	132	0	0	158	0	0.96	5.46	1	2.01	1	0.96	1	3.4	1	56	1	42.51	0	351.7	0	0	1
1047	郑长满	2018	2018-06-11	198914	75.65	45.09	30.56	1.47546	#NULL!		#NULL!	UA	2020-10-14	三支	0	0	1	1	0	0	1	53	0	#NULL!	#NULL!	7.89	0	146	0	0	195	0	1.16	3.3	0	1.86	1	1.16	0	1.53	0	10.19	0	52.3	0	315.6	0	1	1
1049	张全加	2018	2018-06-12	139349	71.1	43.26	27.84	1.55388	#NULL!		#NULL!	UA	2020-10-14	单支，左回旋	1	0	0	1	0	0	1	63	0	58	0	6.69	0	128	0	1	267	0	1.22	6.62	1	1.16	0	1.22	0	4.2	1	12.01	0	56.6	0	288.5	0	1	0
1053	于占云	2018	2018-06-01	197555	79.25	47.56	31.69	1.50079	#NULL!		#NULL!	UA	2020-10-14	三支	0	0	1	1	0	0	1	65	0	65	0	6.12	0	134	0	0	190	1	1.3	5.76	1	0.88	0	1.3	0	3.48	1	19.18	1	103.95	0	385.5	0	1	0
1054	赵北晨	2018	2018-06-02	2364	71.3	40.5	30.8	1.31494	#NULL!		#NULL!	UA	2020-10-14	三支	0	0	1	1	0	0	1	77	1	56	0	6.42	0	148	0	0	223	0	1.21	4.16	0	2.41	1	1.21	0	2.12	0	10.52	0	54.72	0	471.9	0	1	1
1055	蔡广余	2018	2018-05-31	197397	76.75	44.95	31.8	1.41352	#NULL!		#NULL!	UA	2020-10-14	单支，左前降-第一对角支	1	0	0	1	0	0	1	58	0	65	0	6.81	0	142	0	0	266	0	0.88	3.91	0	3.9	1	0.88	1	2.03	0	12.79	0	73.1	0	350.6	0	1	0
1057	吴国海	2018	2018-06-04	146645	81.01	46.63	34.38	1.35631	#NULL!		#NULL!	UA	2020-10-14	三支+左主干	0	0	1	1	0	0	1	57	0	45	0	6.24	0	138	0	0	118	0	1.52	5.81	1	1.22	0	1.52	0	3.31	0	13.01	0	61.67	0	400.2	0	1	0
1065	孙建华	2018	2018-04-26	192436	74.9	43.4	31.5	1.37778	#NULL!		#NULL!	UA	2020-10-12	单支，左回旋	1	0	0	1	0	0	0	65	0	57	0	6.5	0	160	0	0	342	0	1.09	3.54	0	2.4	1	1.09	0	1.72	0	7	0	81	0	334.7	0	1	1
1066	王振荣	2018	2018-06-19	199814	71.1	42.7	28.4	1.50352	#NULL!		#NULL!	UA	2020-10-14	单支，左前降	1	0	0	1	0	0	1	68	1	58	0	5.93	0	131	0	0	207	1	1.11	4.27	0	1.35	0	1.11	0	2.39	0	7.74	0	58.1	0	399	0	0	0
1069	郝玉茹	2018	2018-06-20	135626	75.6	42.6	33	1.29091	#NULL!		#NULL!	UA	2020-10-15	三支	0	0	1	1	0	0	0	61	0	#NULL!	#NULL!	7.36	0	151	0	0	321	0	1.33	4.63	0	1.2	0	1.33	0	2.52	0	21.48	1	80	0	269	0	1	1
1070	韩振昌	2018	2018-06-20	200180	73.5	41.7	31.8	1.31132	#NULL!		#NULL!	UA	2020-10-16	三支	0	0	1	1	0	0	1	45	0	#NULL!	#NULL!	7.25	0	148	0	0	161	0	1.28	4.83	0	1.42	0	1.28	0	2.7	0	17.26	1	82.2	0	329	0	0	0
1075	董树学	2018	2018-06-26	201074	78.27	42.56	35.71	1.19182	2018-12-04	UA	#NULL!	UA	#NULL!	双支，左回旋、右冠	0	1	0	1	0	0	1	60	0	65	0	5.61	0	130	0	0	187	0	0.99	2.86	0	1.81	1	0.99	1	1.32	0	13.85	0	65.37	0	375.6	0	1	1
1076	高冠合	2018	2018-06-26	201041	73.95	41.9	32.05	1.30733	#NULL!		#NULL!	UA	2020-10-14	三支	0	0	1	1	0	0	1	72	1	61	0	5.5	0	159	0	0	232	0	1.11	4.3	0	1.87	1	1.11	0	2.37	0	15.45	0	79.11	0	335.5	0	1	1
1077	贾立均	2018	2018-06-26	200978	72.38	42.71	29.67	1.4395	#NULL!		#NULL!	UA	2020-10-14	双支，左回旋、右冠	0	1	0	1	0	0	1	47	0	#NULL!	#NULL!	9.48	0	145	0	0	31	0	0.84	2.73	0	1.52	0	0.84	1	1.36	0	11.19	0	72.28	0	460.8	0	0	1
1079	乔志存	2018	2018-06-28	201338	66.7	41.7	25	1.668	#NULL!		#NULL!	UA	2020-10-14	三支	0	0	1	1	0	0	1	58	0	#NULL!	#NULL!	7.71	0	166	0	0	242	0	1.34	4.23	0	1.42	0	1.34	0	2.17	0	14.62	0	67.04	0	399	0	0	0
1080	徐海滨	2018	2018-06-27	201180	83.39	48.38	35.01	1.38189	#NULL!		#NULL!	UA	2020-10-14	双支，左前降、右冠	0	1	0	1	0	0	1	37	0	56	0	5.32	0	154	0	0	247	0	0.79	4.55	0	4.92	1	0.79	1	2.52	0	13.12	0	67.32	0	451.7	0	1	1
1084	王兆伟	2018	2018-07-02	201663	71.19	42.17	29.02	1.45314	#NULL!		#NULL!	UA	2020-10-14	单支，左前降	1	0	0	1	0	0	1	50	0	#NULL!	#NULL!	7.65	0	125	0	1	18	0	0.58	2.79	0	1.19	0	0.58	1	1.65	0	3.63	0	93.33	0	356	0	1	1
1086	孙长山	2018	2018-06-27	201195	65.07	37.88	27.19	1.39316	#NULL!		#NULL!	UA	2020-10-14	单支，右冠	1	0	0	1	0	0	1	63	0	#NULL!	#NULL!	5.29	0	151	0	0	23	0	1.31	3.39	0	1.23	0	1.31	0	1.54	0	19.04	1	65.2	0	433.1	0	0	0
1087	周亚民	2018	2018-07-02	76408	71.05	41.81	29.24	1.42989	#NULL!		#NULL!	UA	2020-10-14	多支，左前降、左回旋、右冠、中间支	0	0	1	1	0	0	1	68	1	64	0	6.57	0	142	0	0	191	0	1.19	2.57	0	0.72	0	1.19	0	0.95	0	9.87	0	97.8	0	219	0	0	1
1092	韩素芹	2018	2018-07-03	201905	69.9	36.6	33.3	1.0991	2019-02-12	UA	#NULL!	UA	#NULL!	双支，左前降、右冠	0	1	0	1	0	0	0	65	0	58	0	6.53	0	134	0	0	239	0	1.25	4.11	0	1.73	1	1.25	0	2.12	0	13	0	94.3	0	250.9	0	0	1
1093	刘素玲	2018	2018-07-04	202017	80.4	43.2	37.2	1.16129	#NULL!		#NULL!	UA	2020-10-12	单支，左前降	1	0	0	1	0	0	0	60	0	66	0	6.22	0	134	0	0	211	0	1.72	6.48	1	0.71	0	1.72	0	3.74	1	219	1	79.83	0	448	0	0	1
1094	马俊信	2018	2018-06-29	201410	75.34	41.04	34.3	1.1965	#NULL!		#NULL!	UA	2020-10-14	单支，左前降	1	0	0	1	0	0	1	61	0	61	0	6.65	0	137	0	0	214	0	0.92	3.17	0	1.13	0	0.92	1	1.69	0	16.37	1	104	0	354.6	0	0	1
1096	张振萍	2018	2018-07-04	202007	71.22	38.78	32.44	1.19544	#NULL!		#NULL!	UA	2020-10-12	单支，左前降	1	0	0	1	0	0	0	63	0	68	0	5.29	0	165	0	0	192	0	0.96	3.32	0	0.51	0	0.96	1	1.84	0	36	1	97.55	0	132.5	0	1	0
1111	常凤书	2018	2018-07-11	203051	67.28	36.07	31.21	1.15572	#NULL!		#NULL!	UA	2020-10-12	单支，左前降	1	0	0	1	0	0	0	52	0	63	0	6.28	0	149	0	0	270	1	1.78	4.95	0	0.71	0	1.78	0	2.47	0	18	1	70.44	0	150	0	0	0
1112	王汉宝	2018	2018-07-16	139860	63.83	38.27	25.56	1.49726	#NULL!		#NULL!	UA	2020-10-14	单支，左前降	1	0	0	1	0	0	1	62	0	64	0	4.2	0	134	0	0	133	0	0.77	3.08	0	4.15	1	0.77	1	1.43	0	20.59	1	37.5	0	369	0	1	0
1113	杨玉荣	2018	2018-07-16	114140	72.5	39.9	32.6	1.22393	#NULL!		#NULL!	UA	2020-10-12	双支，左前降、右冠	0	1	0	1	0	0	0	61	0	69	0	5.78	0	126	0	1	258	0	1.36	4.73	0	0.42	0	1.36	0	2.65	0	214	1	48	0	104.3	0	1	1
1116	王树林	2018	2018-07-15	203518	72.11	42.06	30.05	1.39967	#NULL!		#NULL!	UA	2020-10-14	三支	0	0	1	1	0	0	1	65	0	58	0	5.91	0	136	0	0	173	0	0.97	1.51	0	0.66	0	0.97	1	0.37	0	15.85	0	52.4	0	148.6	0	0	1
1119	周万金	2018	2018-07-23	204959	69.99	40.03	29.96	1.33611	#NULL!		#NULL!	UA	2020-10-14	三支	0	0	1	1	0	0	1	76	1	45	0	7.6	0	128	0	1	131	0	1.13	4.21	0	1.72	1	1.13	0	2.29	0	9.83	0	202	1	388.4	0	1	0
1121	尹淑云	2018	2018-07-23	155710	73.12	38.87	34.25	1.13489	#NULL!		#NULL!	UA	2020-10-12	双支，左前降、左回旋	0	1	0	1	0	0	0	64	0	77	0	7	0	153	0	0	194	0	1.06	4.29	0	1.08	0	1.06	0	2.48	0	168	1	78.62	0	160	0	0	1
1122	刘建兴	2018	2018-07-23	204700	69.18	42.41	26.77	1.58424	2018-08-17	UA	#NULL!	UA	#NULL!	双支，左前降、右冠	0	1	0	1	0	0	1	42	0	67	0	4.69	0	147	0	0	233	0	0.94	4.47	0	1.56	0	0.94	1	2.67	0	7.8	0	52.7	0	346.6	0	0	0
1123	朱凤芹	2018	2018-07-21	204547	78.92	40.4	38.52	1.04881	#NULL!		#NULL!	UA	2020-10-13	双支	0	1	0	1	0	0	0	58	0	65	0	7.15	0	142	0	0	99	0	1.37	5.02	0	1.88	1	1.37	0	2.73	0	14	0	65	0	209.9	0	1	1
1125	武风英	2018	2018-07-27	205446	62.87	35.19	27.68	1.27132	#NULL!		#NULL!	UA	2020-10-13	三支	0	0	1	1	0	0	0	81	1	55	0	5.84	0	145	0	0	195	0	1.37	4.83	0	1.1	0	1.37	0	2.66	0	275	1	92.02	0	252.4	0	0	0
1128	吴承德	2018	2018-07-23	192974	61.46	33.85	27.61	1.22601	#NULL!		#NULL!	UA	2020-10-14	三支	0	0	1	1	0	0	1	64	0	67	0	5.13	0	137	0	0	194	0	1.31	4.02	0	1.02	0	1.31	0	2.07	0	11.28	0	81.2	0	440.4	0	0	0
1130	刘玉山	2018	2018-07-30	205820	77.3	46.4	30.9	1.50162	#NULL!		#NULL!	UA	2020-10-14	双支，左前降、左回旋	0	1	0	1	0	0	1	61	0	62	0	6.42	0	153	0	0	212	0	1.14	5.84	1	2.08	1	1.14	0	3.55	1	14.76	0	78.62	0	400	0	1	1
1131	刘建兴	2018	2018-07-23	204700	69.18	42.41	26.77	1.58424	2018-08-17	UA	#NULL!	UA	#NULL!	双支，左前降、右冠	0	1	0	1	0	0	1	42	0	67	0	4.69	0	163	0	0	233	0	0.94	4.47	0	1.56	0	0.94	1	2.67	0	7.8	0	69.71	0	346.6	0	0	0
1132	姚丙勤	2018	2018-07-17	197078	77.51	43.96	33.55	1.31028	2018-11-20	UA	#NULL!	UA	#NULL!	三支	0	0	1	1	0	0	1	63	0	70	0	6.15	0	117	0	1	206	1	0.96	3	0	1.3	0	0.96	1	1.5	0	12.3	0	74.87	0	261.8	0	0	1
1133	黄金荣	2018	2018-07-13	203355	79.7	40.5	39.2	1.03316	2019-01-11	UA	#NULL!	UA	#NULL!	三支	0	0	1	1	0	0	0	77	1	54	0	7.19	0	127	0	1	230	1	0.74	3.14	0	1.2	0	0.74	1	1.8	0	6.61	0	64.77	0	211.5	0	1	1
1134	金秀林	2018	2018-07-23	204790	64.57	38.13	26.44	1.44213	#NULL!		#NULL!	UA	2020-10-14	双支，左前降、左回旋	0	1	0	1	0	0	1	59	0	63	0	4.89	0	124	0	1	243	0	1.03	4.82	0	1.54	0	1.03	0	2.88	0	13.95	0	43.96	0	535.6	1	0	0
1136	王秀如	2018	#NULL!	203909	80.2	42.3	37.9	1.11609	2018-03-20	UA	1	UA	#NULL!	三支	0	0	1	1	0	0	0	64	0	69	0	4.49	0	162	0	0	228	0	1.2	6.62	1	0.91	0	1.2	0	4.25	1	46	1	87.22	0	251.5	0	1	1
1138	屈敏	2018	2018-07-23	1954	52.17	27.19	24.98	1.08847	#NULL!		#NULL!	UA	2020-10-13	三支	0	0	1	1	0	0	0	64	0	57	0	4.91	0	143	0	0	124	0	0.78	3.63	0	1.77	1	0.78	1	2.1	0	5	0	67	0	442.8	0	1	1
1139	刘超	2018	2016-09-23	117332	69.9	38.5	31.4	1.22611	2019-04-18	UA	#NULL!	UA	#NULL!	单支，左前降	1	0	0	1	0	0	1	63	0	65	0	5.53	0	145	0	0	180	1	1.22	3.11	0	0.98	0	1.22	0	1.41	0	21.68	1	43	0	220	0	0	0
1140	王淑珍	2018	2018-07-27	205471	87	45.17	41.83	1.07985	2019-01-09	CHD 室早	#NULL!	UA	#NULL!	单支，右冠	1	0	0	1	0	0	0	61	0	66	0	6.58	0	134	0	0	234	0	1.78	5.66	1	1.12	0	1.78	0	2.99	0	3	0	47.3	0	203	0	1	1
1141	张素琴	2018	2018-08-01	206249	76.46	42.21	34.25	1.23241	#NULL!		#NULL!	UA	2020-10-13	单支，左前降	1	0	0	1	0	0	0	53	0	57	0	6.24	0	136	0	0	196	0	0.98	4.28	0	1.64	0	0.98	1	2.48	0	16	0	70.44	0	262.9	0	1	0
1154	刘树义	2018	2018-08-08	204971	72.56	43.57	28.99	1.50293	#NULL!		#NULL!	UA	2020-10-14	双支，左前降、右冠	0	1	0	1	0	0	1	55	0	60	0	7.61	0	144	0	0	215	0	0.98	3.09	0	1.42	0	0.98	1	1.55	0	13.48	0	66.73	0	409.8	0	0	0
1160	方小刚	2018	2018-08-10	207606	76.77	47.03	29.74	1.58137	#NULL!		#NULL!	UA	2020-10-14	单支，左前降	1	0	0	1	0	0	1	46	0	63	0	5.24	0	160	0	0	224	0	1.15	3.25	0	0.84	0	1.15	0	1.6	0	13.47	0	89.31	0	265.4	0	0	0
1161	苏浩军	2018	2018-08-02	206367	73.81	40.82	32.99	1.23734	#NULL!		#NULL!	UA	2020-10-14	单支，左前降	1	0	0	1	0	0	1	67	1	63	0	5.28	0	150	0	0	181	0	1.08	5.15	0	1.1	0	1.08	0	3.15	0	14.85	0	63.4	0	370.6	0	0	0
1162	李文兰	2018	2018-08-15	208260	78.75	44.88	33.87	1.32507	#NULL!		#NULL!	UA	2020-10-13	双支，左前降、左回旋	0	1	0	1	0	0	0	62	0	77	0	6.82	0	162	0	0	254	0	0.88	3.18	0	1.27	0	0.88	1	1.71	0	7.49	0	84.46	0	309.2	0	1	0
1163	孙旺	2018	2018-08-13	72525	69.97	38.16	31.81	1.19962	#NULL!		#NULL!	UA	2020-10-14	单支，右冠	1	0	0	1	0	0	1	64	0	62	0	5.6	0	159	0	0	109	1	0.96	4.34	0	1.92	1	0.96	1	2.51	0	9.48	0	54.57	0	366.3	0	1	0
1167	蒋会英	2018	2018-08-20	208901	77.24	44.66	32.58	1.37078	#NULL!		#NULL!	UA	2020-10-13	单支，左前降	1	0	0	1	0	0	0	73	1	62	0	6.63	0	165	0	0	208	1	1.7	3.76	0	1.06	0	1.7	0	1.54	0	15	0	67.47	0	222.2	0	1	1
1169	王桂祥	2018	2018-08-20	208916	72.1	43.8	28.3	1.5477	#NULL!		#NULL!	UA	2020-10-19	三支	0	0	1	1	0	0	0	62	0	62	0	4.52	0	155	0	0	252	0	1.42	4.89	0	1.84	1	1.42	0	2.59	0	11.58	0	71.18	0	443	0	0	1
1171	班成阳	2018	2018-08-15	208238	70.9	42.2	28.7	1.47038	#NULL!		#NULL!	UA	2020-10-14	单支，左前降	1	0	0	1	0	0	1	48	0	69	0	4.87	0	143	0	0	201	1	1.16	5.72	1	1.81	1	1.16	0	2.98	0	#NULL!	#NULL!	37.3	0	427.8	0	1	1
1177	郝英民	2018	2018-08-27	209800	75.08	42.9	32.18	1.33313	#NULL!		#NULL!	UA	2020-10-14	双支，左前降、左回旋	0	1	0	1	0	0	1	63	0	70	0	7.23	0	149	0	0	247	0	0.72	3.21	0	2.98	1	0.72	1	1.69	0	14.6	0	50.57	0	413.8	0	1	1
1180	杨在东	2018	2018-08-28	209190	68.21	43.25	24.96	1.73277	#NULL!		#NULL!	UA	2020-10-14	双支，左前降、左回旋	0	1	0	1	0	0	1	54	0	60	0	5.2	0	170	0	0	180	1	0.92	3.35	0	1.15	0	0.92	1	1.83	0	19.15	1	62.35	0	460.4	0	0	0
1184	王树田	2018	2018-08-27	209985	73.32	41.42	31.9	1.29843	#NULL!		#NULL!	UA	2020-10-14	单支，左前降	1	0	0	1	0	0	1	64	0	75	0	9.3	0	164	0	0	206	1	1.31	3.44	0	0.98	0	1.31	0	1.61	0	20.86	1	72.59	0	389.6	0	0	0
1185	房维献	2018	2018-08-30	210408	69.88	40.41	29.47	1.37122	2019-03-27	UA	#NULL!	UA	#NULL!	三支	0	0	1	1	0	0	1	53	0	53	0	4.69	0	137	0	0	176	0	0.54	3.38	0	4.22	1	0.54	1	1.85	0	19.05	1	71.5	0	479.9	0	1	1
1186	刘殿玉	2018	2014-05-13	25228	69.5	38.7	30.8	1.25649	2018-08-25	UA	1	UA	#NULL!	单支，右冠	1	0	0	1	0	0	1	54	0	69	0	6.7	0	130	0	0	220	1	1.04	4.3	0	2.62	1	1.04	0	2.07	0	21	1	71	0	408.9	0	1	0
1195	张继福	2018	2018-09-01	210675	66.94	39.37	27.57	1.428	#NULL!		#NULL!	UA	2020-10-14	单支，左前降	1	0	0	1	0	0	1	56	0	60	0	6.8	0	152	0	0	171	0	0.97	4.73	0	4.38	1	0.97	1	2.57	0	12.09	0	66.52	0	393.3	0	1	1
1196	张松学	2018	2018-09-06	36946	81.44	48.33	33.11	1.45968	2019-03-04	UA	#NULL!	UA	#NULL!	双支，左回旋、右冠	0	1	0	1	0	0	1	64	0	77	0	5.78	0	125	0	1	155	0	0.94	3.63	0	1.09	0	0.94	1	2.04	0	16.28	1	74.49	0	396.8	0	0	1
1197	金龙	2018	2018-09-05	211267	79.61	47.37	32.24	1.46929	#NULL!		#NULL!	UA	2020-10-14	三支	0	0	1	1	0	0	1	55	0	66	0	7.5	0	136	0	0	310	1	1.12	4.42	0	1.84	1	1.12	0	2.46	0	13.29	0	63.46	0	314.2	0	1	0
1198	刘淑英	2018	2018-09-04	211156	80.5	44.2	36.3	1.21763	#NULL!		#NULL!	UA	2020-10-13	单支，左前降	1	0	0	1	0	0	0	60	0	63	0	3.58	0	142	0	0	121	0	1.37	5.27	1	0.99	0	1.37	0	3.02	0	42.32	1	90	0	373.7	0	0	0
1199	关树堂	2018	2018-09-05	61794	68.1	40.9	27.2	1.50368	#NULL!		#NULL!	UA	2020-10-14	单支，左前降	1	0	0	1	0	0	1	84	1	63	0	5.35	0	158	0	0	143	0	0.75	2.03	0	1.02	0	0.75	1	0.92	0	18.2	1	84.88	0	559	1	1	0
1205	董文荣	2018	2018-09-10	211938	70.2	40.4	29.8	1.3557	#NULL!		#NULL!	UA	2020-10-13	三支	0	0	1	1	0	0	0	62	0	64	0	6.91	0	146	0	0	269	0	1.13	4.66	0	0.9	0	1.13	0	2.73	0	384.42	1	61	0	207.4	0	1	1
1207	吕桂华	2018	2018-09-10	211868	78.06	44.05	34.01	1.29521	2019-01-16	陈旧性心梗	#NULL!	UA	#NULL!	单支，左前降	1	0	0	1	0	0	0	57	0	#NULL!	#NULL!	5.14	0	149	0	0	243	0	1.09	6.26	1	2.46	1	1.09	0	3.89	1	16.97	1	63.91	0	260.35	0	0	1
1208	麻世伟	2018	2018-09-10	211932	72.72	44.33	28.39	1.56147	#NULL!		#NULL!	UA	2020-10-14	单支，左前降	1	0	0	1	0	0	1	58	0	68	0	4.54	0	124	0	1	139	0	0.74	4.33	0	2.51	1	0.74	1	2.62	0	12.22	0	64	0	364.5	0	1	0
1209	张淑芹	2018	2018-08-22	209279	65.76	38.48	27.28	1.41056	#NULL!		#NULL!	UA	2020-10-13	三支	0	0	1	1	0	0	0	64	0	59	0	7.35	0	169	0	0	374	1	0.66	4.26	0	1.59	0	0.66	1	1.94	0	#NULL!	#NULL!	83.6	0	255	0	1	1
1214	高志华	2018	2018-09-16	38483	83.75	50.17	33.58	1.49404	#NULL!		#NULL!	UA	2020-10-16	三支	0	0	1	1	0	0	0	54	0	66	0	7.7	0	152	0	0	279	0	1.18	5	0	2.01	1	1.18	0	2.86	0	2.7	0	62.2	0	411	0	0	1
1216	蔚桂芝	2018	2018-09-17	212910	72.57	42.1	30.47	1.38169	#NULL!		#NULL!	UA	2020-10-13	单支，右冠	1	0	0	1	0	0	0	70	1	68	0	7.15	0	130	0	0	314	0	1.03	5.64	1	0.49	0	1.03	0	3.64	1	673.61	1	78	0	215.8	0	1	0
1217	卢桂云	2018	2018-09-17	10495	74.4	42.8	31.6	1.35443	#NULL!		#NULL!	UA	2020-10-16	双支，左前降、左回旋	0	1	0	1	0	0	0	63	0	60	0	8.38	0	153	0	0	282	0	1.71	6.61	1	2.72	1	1.71	0	3.65	1	2.7	0	69.4	0	289	0	1	0
1218	刘凤千	2018	2018-09-20	213271	73.22	45.94	27.28	1.68402	#NULL!		#NULL!	UA	2020-10-15	三支	0	0	1	1	0	0	1	53	0	#NULL!	#NULL!	4.17	0	138	0	0	25	0	0.98	4.82	0	1.69	0	0.98	1	2.9	0	18.73	1	62.7	0	466.3	0	0	1
1221	李伟	2018	2018-09-17	212932	78.29	48.51	29.78	1.62895	#NULL!		#NULL!	UA	2020-10-15	三支	0	0	1	1	0	0	1	31	0	67	0	8.39	0	121	0	1	251	0	0.61	1.8	0	0.94	0	0.61	1	0.86	0	20.12	1	114	1	348.1	0	1	1
1222	张立新	2018	2018-09-18	213021	63.3	39.4	23.9	1.64854	#NULL!		#NULL!	UA	2020-10-15	多支，左前降、中间支、左回旋、右冠	0	0	1	1	0	0	1	56	0	63	0	5.27	0	150	0	0	175	0	0.95	2.59	0	1.82	1	0.95	1	1.13	0	15.98	0	72.98	0	233	0	1	1
1224	王秀志	2018	2018-09-25	213790	74.03	44.23	29.8	1.48423	#NULL!		#NULL!	UA	2020-10-15	三支	0	0	1	1	0	0	1	54	0	66	0	8.98	0	143	0	0	192	0	0.87	4.63	0	1.16	0	0.87	1	2.89	0	13.37	0	40.7	0	333.6	0	0	0
1225	崔淑兰	2018	2018-09-25	45030	78.5	45	33.5	1.34328	#NULL!		#NULL!	UA	2020-10-15	单支，左前降	1	0	0	1	0	0	0	60	0	#NULL!	#NULL!	9.63	1	166	0	0	235	0	1.14	8.29	1	5.78	1	1.14	0	5.14	1	6.53	0	66.2	0	277.47	0	1	0
1227	温学通	2018	2018-09-25	213685	78.7	46.35	32.35	1.43277	#NULL!		#NULL!	UA	2020-10-15	单支，左回旋	1	0	0	1	0	0	1	45	0	63	0	11.37	1	158	0	0	325	0	0.79	5.94	1	2.26	1	0.79	1	3.89	1	19.9	1	81	0	283.3	0	1	0
1228	李福	2018	2018-09-25	213696	75.4	44.3	31.1	1.42444	#NULL!		#NULL!	UA	2020-10-16	单支，左前降	1	0	0	1	0	0	1	65	0	78	0	6.41	0	126	0	1	222	0	1.07	3.83	0	1.94	1	1.07	0	2.01	0	22.19	1	52.35	0	550	1	1	1
1229	代荣芝	2018	2018-09-25	213762	78.1	43.5	34.6	1.25723	#NULL!		#NULL!	UA	2020-10-13	双支，左前降、右冠	0	1	0	1	0	0	0	50	0	61	0	6.35	0	164	0	0	195	0	0.99	4.74	0	0.76	0	0.99	1	2.92	0	111.84	1	67.68	0	249.6	0	0	1
1231	王秀琴	2018	2018-09-26	77076	71.2	38.6	32.6	1.18405	#NULL!		#NULL!	UA	2020-10-13	双支，左回旋、右冠	0	1	0	1	0	0	0	75	1	60	0	5.4	0	145	0	0	210	1	1.45	5.26	1	1.03	0	1.45	0	2.95	0	202.9	1	75	0	186.5	0	0	1
1236	薄锡军	2018	2018-09-28	209562	70.48	46.82	23.66	1.97887	#NULL!		#NULL!	UA	2020-10-15	双支，左前降、右冠	0	1	0	1	0	0	1	57	0	56	0	6.24	0	147	0	0	208	1	1.15	4.75	0	1.23	0	1.15	0	2.76	0	13.09	0	69	0	394	0	0	0
1237	霍晓岩	2018	2018-09-27	214061	70	43.7	26.3	1.6616	#NULL!		#NULL!	UA	2020-10-15	三支	0	0	1	1	0	0	1	47	0	63	0	8.9	0	135	0	0	303	1	1.3	5.4	1	1.46	0	1.3	0	3.13	0	16.23	1	65.71	0	443	0	1	1
1242	付成江	2018	2018-10-05	214822	75.4	45.18	30.22	1.49504	#NULL!		#NULL!	UA	2020-10-15	单支，左前降	1	0	0	1	0	0	1	61	0	66	0	5.1	0	118	0	1	148	0	0.8	4.82	0	2.85	1	0.8	1	2.93	0	16.27	1	54.43	0	421.32	0	0	1
1247	黄永强	2018	2018-10-08	215202	77.07	46.46	30.61	1.5178	#NULL!		#NULL!	UA	2020-10-15	多支，左前降、中间支、左回旋、右冠	0	0	1	1	0	0	1	46	0	65	0	6.59	0	141	0	0	246	0	1.02	5.37	1	3.02	1	1.02	0	3.18	0	15.42	0	50.7	0	359.03	0	1	1
1248	欧贵	2018	2018-10-07	87249	72.31	42.09	30.22	1.39279	#NULL!		#NULL!	UA	2020-10-15	三支	0	0	1	1	0	0	1	54	0	67	0	5.15	0	126	0	1	146	0	0.9	4.72	0	8.46	1	0.9	1	2.21	0	13.19	0	70.4	0	440.92	0	1	1
1256	褚玉廷	2018	2018-10-12	215984	65.53	36.04	29.49	1.22211	#NULL!		#NULL!	UA	2020-10-15	单支，左前降	1	0	0	1	0	0	1	66	1	60	0	6.52	0	125	0	1	167	0	0.91	3.14	0	0.95	0	0.91	1	1.69	0	16.9	1	73.3	0	326.87	0	0	0
1262	李向东	2018	2018-10-23	59266	73	42.87	30.13	1.42283	#NULL!		#NULL!	UA	2020-10-15	双支，左前降、右冠	0	1	0	1	0	0	1	49	0	65	0	4.96	0	151	0	0	172	0	1.27	5.77	1	1.73	1	1.27	0	3.43	1	15.52	0	63.9	0	378.25	0	1	0
1264	韩振富	2018	2018-10-23	217480	71.4	43.8	27.6	1.58696	#NULL!		#NULL!	UA	2020-10-15	双支，左前降、右冠	0	1	0	1	0	0	1	68	1	66	0	4.25	0	149	0	0	206	1	1.15	3.29	0	0.71	0	1.15	0	1.64	0	12.56	0	86.4	0	321	0	0	0
1265	李庆丰	2018	2018-10-17	216617	72	41.73	30.27	1.37859	#NULL!		#NULL!	UA	2020-10-15	双支，左前降、左回旋	0	1	0	1	0	0	1	69	1	59	0	6.22	0	137	0	0	190	1	0.79	4.28	0	5.34	1	0.79	1	2.26	0	13.11	0	93.8	0	472.73	0	1	1
1266	朱宝山	2018	2018-10-23	217457	75.51	41.98	33.53	1.25201	#NULL!		#NULL!	UA	2020-10-15	双支，左主干、左前降	0	1	0	1	0	0	1	74	1	76	0	6.17	0	159	0	0	220	1	0.9	3.79	0	1.64	0	0.9	1	2.15	0	16.07	1	62.4	0	328.51	0	0	1
1267	单文刚	2018	2018-10-20	217032	79.74	44.38	35.36	1.25509	#NULL!		#NULL!	UA	2020-10-15	三支	0	0	1	1	0	0	1	39	0	60	0	8.94	0	159	0	0	305	1	1.16	8.22	1	9.02	1	1.16	0	4.75	1	11.64	0	76.7	0	448.26	0	1	1
1268	伊井申	2018	2018-10-23	217527	82.3	45.52	36.78	1.23763	#NULL!		#NULL!	UA	2020-10-15	三支	0	0	1	1	0	0	1	69	1	66	0	5.95	0	127	0	1	236	0	0.95	3.03	0	2.41	1	0.95	1	1.42	0	17.64	1	64.33	0	368.69	0	1	1
1269	陈艳萍	2018	2018-10-16	40824	74.73	43.43	31.3	1.38754	#NULL!		#NULL!	UA	2020-10-13	单支，左前降	1	0	0	1	0	0	0	67	1	67	0	7.15	0	196	0	0	275	0	1.08	3.28	0	0.82	0	1.08	0	1.68	0	7.87	0	55.6	0	256.7	0	1	1
1275	闫素云	2018	2018-10-27	218041	78.04	43.79	34.25	1.27854	2019-05-20	UA	#NULL!	UA	#NULL!	三支	0	0	1	1	0	0	0	60	0	66	0	7.96	0	162	0	0	232	0	0.9	3.8	0	3.13	1	0.9	1	2.01	0	7.05	0	66.4	0	405.1	0	1	1
1276	潘喜	2018	2018-10-21	217112	76.07	47.75	28.32	1.68609	#NULL!		#NULL!	UA	2020-10-15	单支，右冠	1	0	0	1	0	0	1	63	0	64	0	7.66	0	152	0	0	224	0	1.37	4.43	0	1.63	0	1.37	0	2.29	0	15.68	0	79.8	0	285.36	0	0	1
1277	李爱军	2018	2018-10-30	218443	70.47	43.21	27.26	1.58511	#NULL!		#NULL!	UA	2020-10-15	双支，左前降、左回旋	0	1	0	1	0	0	1	61	0	55	0	8.8	0	152	0	0	253	0	0.8	3.83	0	1.29	0	0.8	1	2.3	0	12.1	0	68.3	0	479.47	0	1	0
1278	任枫	2018	2018-10-22	217156	74.3	43.1	31.2	1.38141	#NULL!		#NULL!	UA	2020-10-15	双支，左前降、右冠	0	1	0	1	0	0	1	59	0	65	0	5.68	0	161	0	0	227	0	0.93	2.85	0	1.42	0	0.93	1	1.39	0	15.4	0	94	0	325.06	0	0	1
1279	杨振英	2018	2018-10-26	217904	73.5	38.5	35	1.1	#NULL!		#NULL!	UA	2020-10-15	三支	0	0	1	1	0	0	1	64	0	66	0	9.99	1	157	0	0	265	0	1.36	5.49	1	1.74	1	1.36	0	3.13	0	14.99	0	73.2	0	430	0	1	0
1280	辛瑞槐	2018	2018-10-29	218216	70.92	44.37	26.55	1.67119	#NULL!		#NULL!	UA	2020-10-15	三支	0	0	1	1	0	0	1	64	0	71	0	4.96	0	151	0	0	241	0	0.8	3.05	0	1.1	0	0.8	1	1.69	0	27.09	1	39.01	0	252.71	0	1	1
1281	霍瑞芳	2018	2018-10-29	218265	81.2	42.4	38.8	1.09278	#NULL!		#NULL!	UA	2020-10-13	三支	0	0	1	1	0	0	0	74	1	66	0	6.8	0	138	0	0	192	0	0.84	4.22	0	2.22	1	0.84	1	2.48	0	10.03	0	55	0	211.7	0	1	1
1282	莫来凤	2018	2018-10-25	217769	80.8	43.4	37.4	1.16043	#NULL!		#NULL!	UA	2020-10-13	单支，左回旋	1	0	0	1	0	0	0	69	1	69	0	7.4	0	143	0	0	275	0	1.84	5.72	1	3.7	1	1.84	0	2.73	0	5.15	0	75.5	0	241	0	0	1
1284	王明恺	2018	2018-11-05	219316	73.73	43.6	30.13	1.44706	#NULL!		#NULL!	UA	2020-10-15	三支	0	0	1	1	0	0	1	47	0	53	0	13.78	1	140	0	0	243	0	0.69	5.83	1	5.93	1	0.69	1	3.52	1	17.78	1	57.49	0	351.84	0	1	1
1285	侯继凤	2018	2018-11-06	219457	78.24	46	32.24	1.4268	#NULL!		#NULL!	UA	2020-10-13	单支，左前降	1	0	0	1	0	0	0	66	1	59	0	4.3	0	124	0	1	185	0	0.92	5.25	1	2.57	1	0.92	1	3.21	0	11.72	0	51.01	0	340	0	1	0
1286	周玉霞	2018	2018-11-06	15536	73.58	41.76	31.82	1.31238	2018-06-27	高血压病	#NULL!	UA	2020-10-13	三支	0	0	1	1	0	0	0	67	1	70	0	7.36	0	148	0	0	381	1	1.63	6.85	1	1.28	0	1.63	0	4.05	1	92.74	1	76	0	231.6	0	1	1
1287	杜荣	2018	2018-11-05	186730	78.75	49.15	29.6	1.66047	#NULL!		#NULL!	UA	2020-10-15	单支，左前降	1	0	0	1	0	0	1	58	0	68	0	6.56	0	134	0	0	179	0	0.55	2.5	0	3.63	1	0.55	1	1.2	0	9.44	0	52.6	0	449.49	0	1	1
1289	连桂云	2018	2018-11-07	5848	78.74	40.05	38.69	1.03515	#NULL!		#NULL!	UA	2020-10-13	双支，左前降、右冠	0	1	0	1	0	0	0	61	0	56	0	8.23	0	153	0	0	278	0	1.48	4.7	0	0.69	0	1.48	0	2.51	0	122.07	1	62	0	182	0	1	1
1292	韩贺民	2018	2018-11-12	220137	76.37	43.98	32.39	1.35783	#NULL!		#NULL!	UA	2020-10-15	双支，左前降、右冠	0	1	0	1	0	0	1	54	0	60	0	11.26	1	155	0	0	353	1	1.25	4.17	0	1.45	0	1.25	0	2.19	0	26.01	1	77.6	0	374.43	0	0	0
1297	韩天昌	2018	2018-11-12	220301	70.18	43.31	26.87	1.61183	#NULL!		#NULL!	UA	2020-10-15	单支，左回旋	1	0	0	1	0	0	1	54	0	72	0	6.3	0	126	0	1	236	0	0.88	4.8	0	2.89	1	0.88	1	2.85	0	19.28	1	51.79	0	430.57	0	1	0
1298	周凤侠	2018	2018-11-12	220130	78.33	44.6	33.73	1.32227	#NULL!		#NULL!	UA	2020-10-13	双支，左前降、左回旋	0	1	0	1	0	0	0	56	0	65	0	6.7	0	158	0	0	331	0	1.64	4.75	0	0.45	0	1.64	0	2.44	0	113.17	1	84.1	0	232.1	0	0	1
1299	李民	2018	2018-11-14	220671	72.51	43.12	29.39	1.46717	#NULL!		#NULL!	UA	2020-10-15	单支，左回旋	1	0	0	1	0	0	1	51	0	42	0	8.8	0	144	0	0	246	0	1.36	5.41	1	1.1	0	1.36	0	3.13	0	14.84	0	52.95	0	344.15	0	1	0
1300	潘月霞	2018	2018-11-14	220613	82.6	49.9	32.7	1.52599	#NULL!		#NULL!	UA	2020-10-13	双支，左前降、右冠	0	1	0	1	0	0	0	69	1	62	0	6.3	0	141	0	0	178	0	0.99	5.14	0	5.53	1	0.99	1	2.77	0	3.6	0	56.63	0	202.5	0	0	1
1301	狄秀环	2018	2018-11-14	220630	83.09	49.39	33.7	1.46558	#NULL!		#NULL!	UA	2020-10-13	双支，左前降、右冠	0	1	0	1	0	0	0	62	0	65	0	5.96	0	133	0	0	344	0	2.29	5.04	0	1.21	0	2.29	0	2.08	0	30.82	1	51.18	0	239.3	0	1	0
1302	司瑞香	2018	2018-11-09	219862	80	42.4	37.6	1.12766	2019-04-08	CHD	#NULL!	UA	#NULL!	双支，左前降、左回旋	0	1	0	1	0	0	0	51	0	64	0	5.26	0	136	0	0	275	0	1.14	3.43	0	1.59	0	1.14	0	1.67	0	6.6	0	53.3	0	257.2	0	1	0
1307	王秀英	2018	2018-11-21	221690	62.84	35.85	26.99	1.32827	#NULL!		#NULL!	UA	2020-10-13	三支	0	0	1	1	0	0	0	63	0	63	0	11.49	1	143	0	0	179	0	1.64	4.46	0	1.78	1	1.64	0	2.08	0	63.84	1	89.2	0	368.2	0	1	0
1310	王建华	2018	2018-11-16	220924	68.8	41.5	27.3	1.52015	#NULL!		#NULL!	UA	2020-10-15	单支，左前降	1	0	0	1	0	0	1	60	0	69	0	3.53	0	149	0	0	178	0	0.82	3.34	0	0.52	0	0.82	1	1.89	0	7.5	0	49	0	271	0	0	0
1311	孙淑荣	2018	2018-11-21	149526	75.12	44.02	31.1	1.41543	2018-05-30	高血压病	#NULL!	UA	2020-10-13	单支，左前降	1	0	0	1	0	0	0	65	0	66	0	7	0	151	0	0	206	1	1.89	7.59	1	3.84	1	1.89	0	4.18	1	15.25	0	50	0	189	0	1	1
1312	王桂琴	2018	2018-11-19	221280	83.09	48.52	34.57	1.40353	#NULL!		#NULL!	UA	2020-10-16	双支，左前降、右冠	0	1	0	1	0	0	0	61	0	#NULL!	#NULL!	5.5	0	136	0	0	235	0	1.45	5.96	1	0.87	0	1.45	0	3.52	1	18.62	1	36.62	0	185	0	0	1
1313	张素枝	2018	2018-11-17	137738	72.19	41.73	30.46	1.36999	#NULL!		#NULL!	UA	2020-10-13	三支	0	0	1	1	0	0	0	62	0	67	0	5.32	0	159	0	0	220	1	1.44	4.15	0	0.75	0	1.44	0	2.09	0	23.09	1	89	0	151.3	0	1	1
1316	谢伍喜	2018	2018-11-23	221942	69.49	43.69	25.8	1.69341	#NULL!		#NULL!	UA	2020-10-15	单支，左前降	1	0	0	1	0	0	1	51	0	68	0	7.88	0	149	0	0	267	0	0.93	4.06	0	1.98	1	0.93	1	2.31	0	11.84	0	70	0	274.99	0	1	1
1322	邹连春	2018	2018-11-29	222812	80.65	45.3	35.35	1.28147	#NULL!		#NULL!	UA	2020-10-16	单支，左前降	1	0	0	1	0	0	0	44	0	#NULL!	#NULL!	3.86	0	168	0	0	252	0	1.12	6.1	1	1.38	0	1.12	0	3.85	1	11.02	0	96.1	0	206.86	0	0	0
1323	高海波	2018	2018-11-27	222450	74.09	45.44	28.65	1.58604	#NULL!		#NULL!	UA	2020-10-15	双支，左前降、右冠	0	1	0	1	0	0	1	57	0	#NULL!	#NULL!	5.62	0	130	0	0	185	0	0.72	4.36	0	2.66	1	0.72	1	2.65	0	12.6	0	59.96	0	388.27	0	1	1
1326	张树义	2018	2018-11-16	506	73.85	42.69	31.16	1.37003	#NULL!		#NULL!	UA	2020-10-15	双支，左回旋、右冠	0	1	0	1	0	0	1	60	0	#NULL!	#NULL!	8.77	0	127	0	1	22	0	0.63	4.28	0	3.77	1	0.63	1	2.54	0	15.89	0	94	0	450.09	0	1	1
1328	姜瑞清	2018	2018-11-23	221979	68.8	41.58	27.22	1.52755	#NULL!		#NULL!	UA	2020-10-15	单支，左前降	1	0	0	1	0	0	1	57	0	69	0	8.1	0	149	0	0	139	0	0.9	5.27	1	3.53	1	0.9	1	3.14	0	16.3	1	52.2	0	156.22	0	1	1
1335	杨学会	2018	2018-12-02	165419	69.53	41.25	28.28	1.45863	#NULL!		#NULL!	UA	2020-10-15	双支，左前降、左回旋	0	1	0	1	0	0	1	62	0	71	0	6.98	0	162	0	0	199	0	0.85	2.65	0	0.79	0	0.85	1	1.36	0	14.85	0	96.7	0	286.27	0	0	1
1338	庄福新	2018	2018-12-01	223117	63.44	40.74	22.7	1.79471	2019-01-07	UA	#NULL!	UA	#NULL!	双支，左前降、右冠	0	1	0	1	0	0	1	63	0	59	0	8.22	0	153	0	0	155	0	0.95	4.6	0	1.64	0	0.95	1	2.76	0	20.88	1	97	0	279.53	0	0	1
1343	张玉华	2018	2018-12-03	190570	78.89	46.56	32.33	1.44015	#NULL!		#NULL!	UA	2020-10-13	三支	0	0	1	1	0	0	0	59	0	67	0	5.13	0	145	0	0	219	0	1.39	5.19	0	1.37	0	1.39	0	2.9	0	127.39	1	54.31	0	351	0	1	0
1345	孙玉华	2018	2018-12-05	223818	91.99	51.57	40.42	1.27585	#NULL!		#NULL!	UA	2020-10-13	双支，左前降、右冠	0	1	0	1	0	0	0	62	0	57	0	6.66	0	133	0	0	288	0	1.47	3.19	0	1.29	0	1.47	0	1.25	0	8.43	0	52	0	212.6	0	1	1
1352	刘进春	2018	2018-12-11	224515	77.2	44.1	33.1	1.33233	#NULL!		#NULL!	UA	2020-10-15	双支，左前降、右冠	0	1	0	1	0	0	1	61	0	65	0	7.35	0	169	0	0	219	0	1.27	4.31	0	0.93	0	1.27	0	2.34	0	20.09	1	93.4	0	221	0	0	0
1364	王亚男	2018	2018-12-18	225585	74.19	44.18	30.01	1.47218	#NULL!		#NULL!	UA	2020-10-15	单支，左前降	1	0	0	1	0	0	1	35	0	60	0	8.54	0	120	0	1	191	0	0.76	3.99	0	1.93	1	0.76	1	2.39	0	18.06	1	51.59	0	366.63	0	1	0
1365	高艳平	2018	2018-12-17	225500	78.19	42.53	35.66	1.19265	#NULL!		#NULL!	UA	2020-10-13	单支，左前降	1	0	0	1	0	0	0	39	0	56	0	4.34	0	164	0	0	281	0	1.33	4.67	0	1.24	0	1.33	0	2.55	0	97.97	1	56.6	0	337.2	0	1	1
1366	赵险峰	2018	2018-12-12	195402	70.99	45.05	25.94	1.7367	#NULL!		#NULL!	UA	2020-10-15	双支，左前降、左回旋	0	1	0	1	0	0	1	50	0	55	0	5	0	164	0	0	195	0	1.12	4.47	0	3.07	1	1.12	0	2.37	0	2.7	0	79.8	0	246.55	0	1	1
1371	刘文学	2018	2018-12-19	188388	73.8	42.9	30.9	1.38835	#NULL!		#NULL!	UA	2020-10-16	双支，左前降、左回旋	0	1	0	1	0	0	1	60	0	75	0	5.62	0	140	0	0	283	0	1.35	5.32	1	1.58	0	1.35	0	3.02	0	17.81	1	78.8	0	257	0	1	1
1372	曲俊岭	2018	2018-12-22	64540	72.31	39.98	32.33	1.23662	#NULL!		#NULL!	UA	2020-10-16	单支，左前降	1	0	0	1	0	0	1	77	1	60	0	6.47	0	158	0	0	183	0	0.73	3.74	0	1.03	0	0.73	1	2.31	0	7.37	0	65.8	0	336.7	0	1	1
1374	温汉义	2018	2018-12-25	226652	75.39	47.65	27.74	1.71774	#NULL!		#NULL!	UA	2020-10-16	双支，左回旋、右冠	0	1	0	1	0	0	1	51	0	58	0	7.51	0	144	0	0	310	0	1	4.65	0	2.2	1	1	0	2.7	0	11.12	0	69	0	490.08	0	1	1
1375	纪海英	2018	2018-12-25	226590	67.8	39.4	28.4	1.38732	#NULL!		#NULL!	UA	2020-10-16	单支，左前降	1	0	0	1	0	0	1	55	0	60	0	7.3	0	135	0	0	209	0	1.02	3.77	0	0.89	0	1.02	0	2.11	0	8.81	0	75	0	415	0	0	0
1376	王文起	2018	2017-08-15	158901	65.3	38.1	27.2	1.40074	#NULL!		#NULL!	UA	2020-10-16	三支	0	0	1	1	0	0	1	71	1	40	0	6.58	0	125	0	1	226	0	0.98	4.48	0	1.81	1	0.98	1	2.62	0	9.22	0	59.1	0	341	0	1	1
1378	王贺凤	2018	2018-12-25	226688	92.53	48.4	44.13	1.09676	#NULL!		#NULL!	UA	2020-10-15	三支	0	0	1	1	0	0	0	59	0	47	0	7.1	0	154	0	0	265	0	1.19	4.89	0	2.1	1	1.19	0	2.75	0	9.54	0	47.4	0	292.26	0	1	1
846	梁广库	2018	2018-02-27	184253	64.48	36.39	28.09	1.29548	2018-03-21	NSTEMI	1	NSTEMI	#NULL!	三支	0	0	1	0	0	1	1	57	0	59	0	8.71	0	136	0	0	189	0	0.95	4.71	0	0.66	0	0.95	1	2.94	0	97.69	1	72.3	0	326.6	0	0	0
238	尹桂芹	2016	2016-02-21	91810	69	41.7	27.3	1.52747	#NULL!	心脏骤停、猝死	#NULL!	NSTEMI	#NULL!	双支，左前降、右冠	0	1	0	0	0	1	0	57	0	64	0	9.31	0	144	0	0	264	0	1.18	4.79	0	1.11	0	1.18	0	3.11	0	40	1	60	0	230.3	0	1	1
332	梁树全	2016	2016-11-07	122485	58.9	31.2	27.7	1.12635	#NULL!		#NULL!	NSTEMI	2020-10-10	双支，左前降、右冠	0	1	0	0	0	1	1	74	1	45	0	5.73	0	132	0	0	194	0	0.79	2.65	0	0.79	0	0.79	1	1.5	0	4	0	64.7	0	251.6	0	1	0
722	牛宝文	2017	2017-09-06	161815	76	39.5	36.5	1.08219	2018-09-04	三都房室传导阻滞	#NULL!	NSTEMI	2020-10-12	三支	0	0	1	0	0	1	1	65	0	56	0	7.39	0	158	0	0	221	0	0.65	5.45	1	2.25	1	0.65	1	3.62	1	14	0	78.1	0	442.1	0	1	1
831	刘汉国	2018	2018-02-21	182935	70.54	40.23	30.31	1.32728	#NULL!		#NULL!	NSTEMI	2020-10-13	双支，左回旋、右冠	0	1	0	0	0	1	1	68	1	32	1	4.49	0	157	0	0	154	0	1.35	5.94	1	0.6	0	1.35	0	3.61	1	16.17	1	49.87	0	267.2	0	1	0
1258	杨文贵	2018	2018-10-10	215700	68.99	37.96	31.03	1.22333	2018-10-18		#NULL!	NSTEMI	2020-10-15	双支，左前降、左回旋	0	1	0	0	0	1	1	73	1	52	0	7.52	0	165	0	0	154	0	0.79	5.67	1	5.13	1	0.79	1	3.39	0	25.58	1	70.9	0	376.57	0	1	1
1377	张素英	2018	2018-12-28	227044	65	38.4	26.6	1.44361	#NULL!		#NULL!	NSTEMI	2020-10-13	三支	0	0	1	0	0	1	0	71	1	56	0	8.1	0	137	0	0	227	0	0.8	2.85	0	0.53	0	0.8	1	1.59	0	8.29	0	54.7	0	255.6	0	1	0
105	涂亚平	2016	2016-03-27	96221	74.2	38.6	35.6	1.08427	2019-03-11	STEMI	1	STEMI	#NULL!	单支	1	0	0	0	1	0	1	61	0	58	0	10.51	1	130	0	0	246	0	1	4.46	0	5.71	1	1	0	0.86	0	14	0	93.7	0	355.3	0	1	0
145	杨国君	2016	2014-01-31	13797	72.6	41.7	30.9	1.34951	2016-05-13	急性广泛前壁心梗	1	STEMI	#NULL!	单支，左前降	1	0	0	0	1	0	1	48	0	#NULL!	#NULL!	9.14	0	152	0	0	18	0	1.13	4.32	0	1.46	0	1.13	0	2.53	0	14	0	84.2	0	459.1	0	0	0
218	尹素凤	2016	2016-07-18	109572	74.9	41.1	33.8	1.21598	2018-06-04	NSTEMI	1	STEMI	#NULL!	双支，左前降支、右冠状动脉	0	1	0	0	1	0	0	54	0	53	0	14.8	1	137	0	0	281	0	1.5	6.98	1	2.1	1	1.5	0	4.17	1	197	1	45	0	310	0	1	0
363	韩秀勤	2016	2016-12-06	126129	76.2	39.1	37.1	1.05391	2017-12-19	STEMI广泛前壁、右室壁	1	STEMI	#NULL!	三支	0	0	1	0	1	0	1	68	1	56	0	11.8	1	159	0	0	150	0	0.83	4.1	0	2.68	1	0.83	1	2.05	0	22	1	79.9	0	296.5	0	1	1
384	范连满	2017	2017-11-24	171862	74.8	39.3	35.5	1.10704	2018-01-01	NSTEMI	1	STEMI	2020-10-11	三支	0	0	1	0	1	0	1	54	0	45	0	11.8	1	131	0	0	170	0	1.33	4.92	0	0.72	0	1.33	0	2.8	0	300	1	61.3	0	269.9	0	0	0
400	祁成金	2017	2017-01-09	130043	61.3	37.5	23.8	1.57563	2017-12-12	NSTEMI	#NULL!	STEMI	#NULL!	三支	0	0	1	0	1	0	1	54	0	60	0	12.97	1	157	0	0	222	0	2.6	5.01	0	1.66	0	2.6	0	1.66	0	40	1	58.47	0	319.8	0	0	1
489	李革新	2017	2014-07-31	33950	60.9	38.3	22.6	1.69469	2017-03-07	STEMI下壁、右室壁	1	STEMI	#NULL!	三支	0	0	1	0	1	0	1	65	0	60	0	12.84	1	141	0	0	230	0	1.13	5.03	0	2.21	1	1.13	0	2.9	0	30	1	59.6	0	476.6	0	1	1
677	张满利	2017	2017-08-04	157487	62.6	35.9	26.7	1.34457	2018-03-26	NSTEMI	#NULL!	STEMI	#NULL!	三支	0	0	1	0	1	0	1	59	0	46	0	17.44	1	173	0	0	179	0	1.03	3.94	0	1.8	1	1.03	0	2.15	0	606	1	69.1	0	427.2	0	1	1
702	魏宝成	2017	2017-08-21	159595	77.4	45.9	31.5	1.45714	2018-01-26	STEMI下壁	1	STEMI	#NULL!	三支	0	0	1	0	1	0	1	57	0	#NULL!	#NULL!	11.36	1	136	0	0	198	0	1.06	6.17	1	4.35	1	1.06	0	3.65	1	16	0	65.2	0	398	0	1	1
773	刘振武	2018	2018-01-31	181160	65.4	35.6	29.8	1.19463	2018-02-23	STEMI 鼻出血	#NULL!	STEMI	#NULL!	单支，左前降	1	0	0	0	1	0	1	62	0	56	0	6.1	0	151	0	0	125	0	1.44	4.13	0	1.06	0	1.44	0	2.05	0	33.97	1	61	0	239	0	0	1
799	徐世兰	2018	2018-02-07	181881	64.57	35.54	29.03	1.22425	2018-09-03	STEMI	1	STEMI	#NULL!	三支	0	0	1	0	1	0	0	81	1	52	0	9.19	0	122	0	1	260	0	1.12	4.03	0	1.57	0	1.12	0	2.17	0	34.76	1	61.21	0	338.4	0	0	1
862	白云成	2018	2018-03-05	184904	60.21	35.23	24.98	1.41033	2018-03-17	STEMI 广泛前壁	1	STEMI	#NULL!	单支，左前降	1	0	0	0	1	0	1	78	1	57	0	8.14	0	133	0	0	190	0	1.44	4.89	0	0.44	0	1.44	0	2.72	0	192.94	1	60.66	0	268.8	0	0	0
880	张如意	2018	2018-03-13	186395	64.86	38.79	26.07	1.48792	2018-05-31	NSTEMI	1	STEMI	#NULL!	三支	0	0	1	0	1	0	1	60	0	53	0	11.15	1	136	0	0	236	0	0.82	3.28	0	0.34	0	0.82	1	1.93	0	286.94	1	74.49	0	370.2	0	0	0
1062	司瑞民	2018	2018-06-17	199738	62.7	37.31	25.39	1.46948	2018-07-18	NSTEMI	#NULL!	STEMI	#NULL!	单支，左前降	1	0	0	0	1	0	1	66	1	59	0	6.1	0	173	0	0	135	0	1.35	3.84	0	0.8	0	1.35	0	1.91	0	6.03	0	80.55	0	293.2	0	0	0
1204	金仕东	2018	2018-09-11	212173	68	40.4	27.6	1.46377	2018-09-28	STEMI下壁、后壁	1	STEMI	#NULL!	三支	0	0	1	0	1	0	1	51	0	47	0	13.99	1	146	0	0	200	0	0.88	4.57	0	1.97	1	0.88	1	2.76	0	228.47	1	46.28	0	396	0	1	1
1340	迟永海	2018	2015-06-10	66406	61.5	36.3	25.2	1.44048	2018-12-01	NSTEMI	1	STEMI	#NULL!	单支，左前降	1	0	0	0	1	0	1	58	0	#NULL!	#NULL!	17.36	1	165	0	0	17	0	1.16	4.09	0	1.33	0	1.16	0	2.33	0	254	1	97.1	0	297.5	0	0	0
16	勾亚芹	2016	2016-01-13	88543	79.2	47.1	32.1	1.46729	#NULL!		#NULL!	STEMI	2020-10-09	左前降支	1	0	0	0	1	0	0	68	1	57	0	12.17	1	136	0	0	135	0	1.14	5.15	0	2.08	1	1.14	0	3.06	0	449	1	57.9	0	242	0	0	1
142	刘丰瑞	2016	2016-05-11	101686	72.3	38.4	33.9	1.13274	#NULL!	心源性休克，放弃	#NULL!	STEMI	#NULL!	双支，左前降、左回旋	0	1	0	0	1	0	1	74	1	24	1	9.69	1	155	0	0	184	0	1.35	3.15	0	2.53	1	1.35	0	0.65	0	258	1	105.1	0	414	0	1	0
228	丁贵	2016	2016-08-07	111960	67.1	36.1	31	1.16452	#NULL!		#NULL!	STEMI	2020-10-10	双支，左前降、左回旋	0	1	0	0	1	0	1	62	0	70	0	8.95	0	145	0	0	179	0	1.3	3.51	0	2.14	1	1.3	0	1.24	0	12	0	108.3	0	379.6	0	1	1
259	于国田	2016	2016-09-02	115054	57	31.4	25.6	1.22656	#NULL!		#NULL!	STEMI	2020-10-10	单支，左主干	1	0	0	0	1	0	1	63	0	37	1	16.94	1	160	0	0	34	0	1.89	6	1	1.65	0	1.89	0	3.36	0	215	1	88.7	0	333.1	0	1	0
335	李宗义	2016	2016-11-23	124428	79.1	44.5	34.6	1.28613	#NULL!		#NULL!	STEMI	2020-10-11	双支，左回旋、右冠	0	1	0	0	1	0	1	46	0	39	1	15.75	1	162	0	0	232	0	1.17	5.67	1	2.94	1	1.17	0	3.16	0	21	1	60.8	0	381.2	0	1	1
409	刘玉柱	2017	2017-01-13	130767	67.6	37.9	29.7	1.27609	2017-01-13	退院（死亡）	#NULL!	STEMI	#NULL!	多支，左主干、左前降、左回旋、右冠	0	0	1	0	1	0	1	62	0	39	1	1.33	0	134	0	0	246	0	0.91	2.75	0	1.3	0	0.91	1	1.25	0	128	1	112.2	1	354.5	0	0	1
495	戢鹏翎	2017	2017-03-17	138498	59.2	29.2	30	0.973333	#NULL!		#NULL!	STEMI	2020-10-11	三支	0	0	1	0	1	0	1	56	0	41	0	11.81	1	152	0	0	201	0	1.31	5.38	1	1	0	1.31	0	3.62	1	46	1	74.8	0	286.2	0	1	0
572	秦才	2017	2017-05-23	147368	68.9	37.6	31.3	1.20128	#NULL!		#NULL!	STEMI	2020-10-12	三支	0	0	1	0	1	0	1	64	0	53	0	15.27	1	163	0	0	218	0	1.29	4	0	0.94	0	1.29	0	2.28	0	84	1	55.5	0	197.1	0	0	0
608	李成	2017	2017-06-15	150396	65.9	37.7	28.2	1.33688	#NULL!		#NULL!	STEMI	2020-10-12	双支，左冠状动脉主干、右冠状动脉	0	1	0	0	1	0	1	48	0	#NULL!	#NULL!	11.88	1	147	0	0	153	0	0.92	4.33	0	3.57	1	0.92	1	1.79	0	36	1	75.4	0	295.8	0	1	0
746	王金合	2018	2018-01-12	178370	66.7	38.3	28.4	1.34859	#NULL!		#NULL!	STEMI	2020-10-12	三支	0	0	1	0	1	0	1	61	0	58	0	6.62	0	146	0	0	231	0	1.16	3.39	0	0.67	0	1.16	0	1.72	0	88	1	53	0	391.1	0	0	1
812	张国仁	2018	2018-02-10	182248	61.32	36.23	25.09	1.444	#NULL!		#NULL!	STEMI	2020-10-13	多支	0	0	1	0	1	0	1	69	1	#NULL!	#NULL!	14.21	1	139	0	0	273	0	1.18	4.24	0	0.51	0	1.18	0	2.4	0	191.57	1	82.09	0	293.4	0	0	0
858	陈龙	2018	2018-03-03	184790	68.51	37.45	31.06	1.20573	2018-03-04		#NULL!	STEMI	2020-10-13	双支，左前降、右冠	0	1	0	0	1	0	1	60	0	42	0	12.39	1	148	0	0	72	0	1.19	4.06	0	0.98	0	1.19	0	2.2	0	275.52	1	62.92	0	409.6	0	0	1
1115	王桂兰	2018	2018-07-19	204359	62.7	33.61	29.09	1.15538	2018-09-12		#NULL!	STEMI	#NULL!	单支，左前降	1	0	0	0	1	0	0	70	1	41	0	11.11	1	153	0	0	176	0	#NULL!	#NULL!	0	#NULL!	0	#NULL!	1	#NULL!	0	#NULL!	#NULL!	81.22	0	#NULL!	#NULL!	0	0
1239	刘洪振	2018	2018-10-01	214518	61.1	34.5	26.6	1.29699	2018-10-02		#NULL!	STEMI	2020-10-15	多支	0	0	1	0	1	0	1	62	0	#NULL!	#NULL!	12.77	1	126	0	1	321	0	0.97	3.97	0	0.7	0	0.97	1	2.33	0	123.49	1	107.4	0	444.02	0	0	1
86	邵桂英	2016	2016-02-21	94632	66.6	38.2	28.4	1.34507	2016-08-12	NSTEMI	1	无症状心肌缺血	#NULL!	三支	0	0	1	1	0	0	0	66	1	74	0	9.36	0	125	0	1	257	0	0.92	4.71	0	5.93	1	0.92	1	1.09	0	9	0	55.2	0	189	0	1	1
221	曲秀梅	2016	2016-07-18	109490	71.6	39.7	31.9	1.24451	2016-06-13	STEMI广泛前壁	#NULL!	UA	#NULL!	双支，左前降支、左回旋支	0	1	0	1	0	0	0	62	0	60	0	5.84	1	129	0	0	199	0	1.21	4.49	0	1.66	0	1.21	0	2.53	0	9	0	53.8	0	349.5	0	0	1
255	高杰	2016	2014-01-03	11325	74.6	42.1	32.5	1.29538	2016-09-23	STEMI	1	UA	#NULL!	三支	0	0	1	1	0	0	1	48	0	#NULL!	#NULL!	8.93	1	148	0	0	158	0	0.69	3.25	0	4.21	1	0.69	1	2.06	0	#NULL!	#NULL!	93.6	0	391	0	1	0
810	白玉兰	2018	2018-02-07	182006	77.8	44.6	33.2	1.34337	2017-06-04	NSTEMI	#NULL!	UA	#NULL!	三支	0	0	1	1	0	0	0	63	0	56	0	7.45	0	127	0	1	177	0	1.05	5.12	0	3.18	1	1.05	0	2.62	0	8	0	59.11	0	437.2	0	1	1
906	谢淑援	2018	2018-03-13	186315	77.09	43.11	33.98	1.26869	2019-01-21	NSTEMI	1	UA	#NULL!	三支	0	0	1	1	0	0	0	70	1	64	0	7.77	0	134	0	0	302	1	1.08	5.81	1	1.18	0	1.08	0	4.19	1	67	1	57.88	0	339.8	0	1	1
1048	尤志平	2018	2018-06-11	199020	80.46	45.51	34.95	1.30215	2019-04-04	NSTEMI	#NULL!	UA	#NULL!	单支，左前降	1	0	0	1	0	0	0	59	0	#NULL!	#NULL!	7.37	0	144	0	0	218	0	1.86	8.4	1	1.39	0	1.86	0	5.09	1	926.79	1	75.63	0	333.85	0	0	1
203	张桂芬	2016	2016-04-25	107891	83	43.7	39.3	1.11196	#NULL!		#NULL!	UA	2020-10-09	单支，左前降	1	0	0	1	0	0	0	54	0	65	0	6.76	0	138	0	0	212	0	0.85	4.67	0	4.89	1	0.85	1	1.6	0	#NULL!	#NULL!	90.25	0	390.6	0	1	1
219	刘新华	2016	2016-07-13	108964	94.2	38.2	56	0.682143	#NULL!		#NULL!	UA	2020-10-09	三支	0	0	1	1	0	0	0	70	1	55	0	4.64	0	112	0	1	184	0	1.35	4.79	0	1.29	0	1.35	0	2.85	0	78	1	67.8	0	316.8	0	1	1
509	高素芳	2017	2017-03-24	139505	69.8	37.4	32.4	1.15432	2016-11-16	死亡、心律失常、室颤	#NULL!	UA	#NULL!	三支	0	0	1	1	0	0	0	72	1	58	0	4.72	0	149	0	0	245	0	1.07	4.62	0	3.33	1	1.07	0	2.04	0	11	0	74.2	0	301.6	0	1	0
1061	景连友	2018	2018-06-15	199531	71.3	41.9	29.4	1.42517	#NULL!		#NULL!	UA	2020-10-14	单支，右冠	1	0	0	1	0	0	1	72	1	57	0	7.44	0	154	0	0	120	1	0.79	3.8	0	0.92	0	0.79	1	2.32	0	9.92	0	62.68	0	531	1	1	1
1068	李广森	2018	2018-06-19	199904	71.81	42.53	29.28	1.45253	#NULL!		#NULL!	UA	2020-10-14	三支	0	0	1	1	0	0	1	65	0	#NULL!	#NULL!	5.13	0	132	0	0	241	0	1.32	4.15	0	0.93	0	1.32	0	2.17	0	10.61	0	64	0	285.2	0	0	0
1354	马建国	2018	2018-12-11	224602	75.2	45.2	30	1.50667	#NULL!		#NULL!	UA	2020-10-13	双支，左前降、左回旋	0	1	0	1	0	0	0	60	0	64	0	4.88	0	160	0	0	268	0	1.1	3.77	0	0.83	0	1.1	0	2.05	0	30.67	1	72.8	0	158.9	0	0	0
[truncated: 9 more columns]
